# Supplementary material for: Inflammatory pathways are upregulated in the nasal epithelium in patients with idiopathic pulmonary fibrosis
Source: Respir Res. 2018 Nov 26;19:233. doi: 10.1186/s12931-018-0932-7 (PMC6257973; doi:10.1186/s12931-018-0932-7)
Supplement: Supplementary file 2 — Non-normalized data gene counts. (CSV 1995 kb) [file 12931_2018_932_MOESM2_ESM.csv]

	JSMS_NE_028	JSMS_NE_029	JSMS_NE_030	JSMS_NE_031	JSMS_NE_032	JSMS_NE_033	JSMS_NE_034	JSMS_NE_035	JSMS_NE_036	JSMS_NE_037	JSMS_NE_038	JSMS_NE_039	JSMS_NE_040	JSMS_NE_041	JSMS_NE_042	JSMS_NE_049	JSMS_NE_051	JSMS_NE_052	JSMS_NE_054	JSMS_NE_055	JSMS_NE_056	JSMS_NE_057	JSMS_NE_058	JSMS_NE_003	JSMS_NE_004	JSMS_NE_005	JSMS_NE_006	JSMS_NE_007	JSMS_NE_008	JSMS_NE_009	JSMS_NE_043	JSMS_NE_044	JSMS_NE_045
ENSG00000000003	164	1609	83	758	239	227	600	496	240	1481	196	334	322	556	369	2	92	543	636	3084	387	216	229	128	172	254	155	246	626	352	218	49	18
ENSG00000000419	7	387	4	116	68	52	76	111	100	193	50	97	111	63	51	1	3	64	110	170	66	20	40	44	15	36	90	42	59	42	47	17	49
ENSG00000000457	0	108	0	161	40	12	14	81	42	2	7	19	65	56	22	3	29	78	59	0	19	2	84	24	13	28	51	22	18	20	1	2	2
ENSG00000000460	0	43	13	0	12	5	0	13	0	0	4	0	39	0	14	0	0	16	19	1	0	0	0	0	0	11	8	1	1	1	2	0	0
ENSG00000000938	21	6	67	324	74	124	10	20	35	101	82	137	9	1	11	119	60	24	23	4	145	637	42	109	159	30	1332	256	12	80	210	1409	432
ENSG00000000971	84	1021	23	263	189	144	300	384	331	341	194	173	279	413	240	22	30	418	200	1302	204	85	127	105	164	211	44	85	322	121	14	11	12
ENSG00000001036	6	256	10	88	43	23	60	37	108	222	24	145	67	160	57	0	3	92	133	111	51	62	43	10	9	54	30	6	42	49	3	30	1
ENSG00000001084	22	2310	43	457	161	81	497	525	327	558	96	317	218	129	150	13	19	334	513	1821	468	78	204	116	132	257	37	69	491	206	13	38	32
ENSG00000001167	22	181	18	27	26	19	17	11	29	0	1	10	31	86	11	2	11	22	2	0	62	36	1	3	17	19	58	28	27	17	94	28	26
ENSG00000001460	0	28	7	121	19	10	34	21	36	84	10	4	25	41	34	17	11	2	28	55	7	118	8	4	3	15	1	14	5	39	1	7	45
ENSG00000001461	34	1199	43	266	193	149	202	115	278	51	175	97	148	123	110	27	75	325	504	357	257	59	97	98	86	184	84	84	261	108	70	25	89
ENSG00000001497	14	4	2	27	16	13	36	17	43	83	42	33	36	32	11	0	2	37	62	1	75	1	31	12	5	5	1	21	29	2	0	29	0
ENSG00000001561	64	1021	16	309	131	92	166	423	119	381	20	118	185	170	113	0	43	143	278	654	101	70	92	88	67	94	25	77	193	128	186	8	4
ENSG00000001617	0	682	38	157	81	70	106	28	178	2	87	41	120	202	80	5	36	212	143	4	159	266	59	20	9	71	35	27	107	47	75	3	14
ENSG00000001626	0	64	8	55	22	13	10	77	44	0	32	0	5	0	18	0	13	15	79	0	8	19	1	0	4	9	0	5	16	4	0	0	2
ENSG00000001629	17	843	0	232	57	106	104	99	183	83	56	176	104	58	124	4	11	140	141	527	34	118	94	42	51	70	74	70	129	125	132	21	12
ENSG00000001630	0	0	0	0	2	4	0	21	3	0	3	0	6	0	6	0	0	3	1	0	1	0	0	0	6	0	0	0	0	2	0	0	0
ENSG00000001631	68	253	21	143	26	57	61	68	50	25	63	83	34	49	87	7	2	195	113	227	49	2	52	50	40	66	4	24	54	16	6	21	3
ENSG00000002016	1	0	0	2	0	0	0	0	0	0	0	1	7	2	4	0	0	14	62	0	1	0	0	2	0	0	0	0	13	1	0	0	1
ENSG00000002330	3	287	7	23	28	25	79	44	25	54	34	17	85	182	50	0	5	30	34	272	53	25	60	10	38	25	11	31	59	22	0	3	7
ENSG00000002549	32	704	47	339	28	52	227	163	165	52	56	14	114	90	107	1	59	145	164	596	77	99	73	98	212	82	40	95	169	213	52	39	70
ENSG00000002586	35	110	22	79	30	44	78	69	47	97	83	24	58	274	55	17	34	102	201	343	63	35	56	19	24	96	28	47	46	39	2	12	6
ENSG00000002587	41	2355	141	500	327	119	533	216	1078	247	376	475	642	291	240	18	33	556	495	1244	270	503	285	114	200	368	92	210	274	254	26	51	60
ENSG00000002822	1	0	1	63	9	12	18	2	29	0	24	22	7	6	22	0	1	31	6	0	22	0	21	8	11	2	5	11	38	15	1	4	1
ENSG00000002834	284	3273	62	719	505	343	880	482	925	1033	244	594	710	862	382	145	161	844	1697	4864	835	608	725	256	329	566	673	220	948	256	414	872	174
ENSG00000002919	10	20	13	95	24	33	71	21	61	81	26	4	23	59	23	3	16	64	69	107	39	42	83	19	31	29	45	10	23	16	2	66	4
ENSG00000002933	0	0	20	0	0	0	5	0	10	0	12	0	0	0	0	0	0	0	0	0	7	3	0	0	8	0	0	0	3	9	0	0	20
ENSG00000003056	58	131	6	33	55	26	30	123	85	1	80	0	55	79	28	0	3	11	2	193	43	29	21	20	36	70	14	30	42	23	3	31	11
ENSG00000003096	0	0	0	17	0	0	0	1	0	0	0	0	0	0	0	0	0	0	0	0	0	0	0	0	0	9	0	2	2	0	0	0	0
ENSG00000003137	0	58	0	0	4	3	0	0	17	49	0	0	0	0	0	0	0	2	0	0	0	0	0	2	0	0	1	14	1	0	0	0	0
ENSG00000003147	15	431	19	57	73	45	25	123	61	14	39	15	32	37	22	0	26	40	162	526	80	19	30	8	45	31	3	10	104	45	2	2	11
ENSG00000003249	1	104	0	1	1	0	12	1	6	0	0	1	5	35	0	0	0	10	0	0	12	1	0	0	6	16	0	0	3	0	0	0	0
ENSG00000003393	20	217	5	112	31	10	37	56	66	1	25	58	26	1	21	0	1	69	65	1	5	1	6	18	4	12	6	0	58	37	2	7	2
ENSG00000003400	1	273	0	55	23	8	54	37	27	2	10	59	30	4	11	0	7	4	56	99	19	5	83	18	25	18	17	14	39	45	1	6	15
ENSG00000003402	254	1638	201	1848	372	479	605	568	825	814	610	844	206	190	333	168	95	615	437	1765	534	874	215	331	437	304	1565	485	600	507	425	897	472
ENSG00000003436	22	188	2	1	40	8	3	38	36	0	15	63	51	61	6	1	3	10	3	173	26	0	9	19	13	13	0	1	15	4	2	1	1
ENSG00000003509	0	0	7	31	45	14	54	15	2	112	7	3	24	0	14	0	0	56	0	0	26	3	0	14	0	26	1	21	4	8	1	1	1
ENSG00000003756	22	1011	44	717	149	158	239	288	439	392	221	332	337	264	148	24	75	318	743	1218	153	284	320	115	89	183	143	134	392	138	269	108	13
ENSG00000003989	4	0	0	149	4	2	11	124	56	88	10	0	0	1	12	1	17	10	39	440	5	1	1	5	4	5	3	30	1	24	3	2	1
ENSG00000004059	0	0	0	1	0	4	0	0	0	0	0	0	1	0	6	7	0	5	28	0	1	0	3	0	1	0	0	0	0	0	0	4	0
ENSG00000004139	1	142	1	90	64	7	44	11	12	61	1	1	14	0	22	13	12	17	28	481	31	1	34	5	8	8	7	38	23	4	1	5	0
ENSG00000004142	50	442	6	69	52	64	137	112	98	4	30	68	120	277	48	1	4	111	108	760	48	79	123	37	21	109	27	21	143	65	102	17	10
ENSG00000004399	1	137	0	1	22	1	16	8	50	0	3	1	18	0	6	0	2	19	2	1	3	29	9	4	8	4	0	1	15	4	1	5	0
ENSG00000004455	24	594	15	95	71	71	144	246	233	0	136	166	123	103	76	2	19	306	274	610	112	92	137	72	42	117	23	111	218	96	175	30	28
ENSG00000004468	12	0	0	212	5	11	108	85	8	280	0	66	17	1	32	0	0	25	49	236	47	13	1	18	18	18	4	10	32	25	1	9	0
ENSG00000004478	5	569	18	97	26	24	53	75	61	4	16	0	46	112	60	0	3	67	65	254	13	30	36	23	20	49	19	31	40	44	18	6	2
ENSG00000004487	43	316	1	169	44	21	110	56	86	151	66	85	33	115	40	2	4	82	121	788	56	14	94	41	17	36	12	18	117	41	41	13	1
ENSG00000004534	15	379	9	416	159	71	82	127	132	240	93	31	86	129	141	25	18	150	227	508	179	32	13	64	33	66	66	34	134	63	57	44	75
ENSG00000004660	16	1	3	2	18	2	0	9	10	0	0	0	0	0	9	1	1	24	0	0	0	13	0	0	0	3	2	13	20	0	1	11	0
ENSG00000004700	18	83	0	97	21	10	36	56	51	89	44	70	43	76	39	0	1	60	35	3	34	64	1	23	26	21	18	50	28	41	0	12	2
ENSG00000004766	0	122	1	66	42	13	33	56	84	63	26	1	19	114	32	0	2	78	46	163	9	39	0	12	16	13	8	20	49	44	2	1	3
ENSG00000004777	1	0	0	0	2	0	12	0	0	0	0	0	0	0	3	0	0	1	0	0	0	0	0	0	0	6	0	1	0	0	0	0	0
ENSG00000004779	94	931	39	378	164	49	249	430	285	499	210	370	460	405	217	5	41	306	453	2437	199	136	224	112	107	216	28	81	333	141	41	66	80
ENSG00000004799	10	0	6	37	12	2	20	34	39	1	19	1	21	22	13	1	0	17	0	0	13	47	2	16	0	28	1	14	34	1	1	15	0
ENSG00000004809	0	0	0	71	1	0	25	6	6	0	0	0	0	0	0	0	1	0	34	0	0	0	0	7	2	15	0	1	0	14	0	0	1
ENSG00000004838	0	0	1	203	6	13	108	75	5	95	1	74	0	0	33	0	1	17	40	638	32	3	0	11	0	31	1	66	12	69	1	1	3
ENSG00000004848	0	0	0	20	0	0	0	12	0	4	0	1	1	0	0	1	0	11	0	0	0	0	0	0	1	10	0	0	0	0	0	0	0
ENSG00000004864	2	79	1	34	30	13	45	42	79	79	65	25	82	34	24	3	2	105	117	2	16	77	1	28	35	59	11	26	126	21	1	3	1
ENSG00000004866	0	80	3	12	14	3	8	29	11	0	27	0	6	0	3	0	0	11	35	67	11	10	1	1	2	9	0	18	3	10	1	0	0
ENSG00000004897	44	826	18	67	50	83	123	115	115	264	79	150	178	60	66	9	6	178	60	403	68	30	67	51	61	76	26	24	168	85	26	35	4
ENSG00000004961	20	406	5	126	63	70	103	46	88	284	26	3	55	59	73	9	31	83	180	195	27	45	57	36	40	91	21	47	30	76	176	14	1
ENSG00000004975	22	176	0	85	32	31	35	7	71	40	47	1	44	18	40	7	14	48	36	328	60	5	40	23	18	40	26	5	67	25	3	29	2
ENSG00000005001	138	1868	44	475	492	174	567	368	302	1131	205	261	744	359	121	136	245	456	1523	1888	1069	510	1004	88	242	213	375	67	699	214	488	220	46
ENSG00000005007	82	1513	46	730	144	173	347	343	208	352	70	385	94	184	162	32	171	331	624	1912	398	224	292	122	100	145	129	136	325	225	150	230	65
ENSG00000005020	43	8	59	224	5	46	12	10	59	2	55	57	25	20	10	25	0	64	6	0	57	169	3	65	39	17	427	165	23	37	152	357	99
ENSG00000005022	160	1992	13	349	278	231	504	273	493	1092	283	383	441	301	334	28	83	804	654	1617	234	170	434	168	175	477	134	83	554	161	153	89	19
ENSG00000005059	25	274	19	73	30	19	65	35	191	131	157	27	93	40	43	9	0	84	23	446	34	38	61	40	52	39	22	31	86	33	4	29	34
ENSG00000005075	67	39	22	44	25	40	36	30	44	108	29	191	51	75	26	0	24	104	202	270	67	44	11	23	6	59	84	22	41	38	178	57	23
ENSG00000005100	34	209	0	110	43	36	65	100	124	68	49	2	62	51	22	1	1	81	215	468	48	10	9	19	10	46	13	23	98	33	1	2	17
ENSG00000005102	0	0	0	0	2	1	0	0	11	0	2	0	0	0	8	0	0	0	0	0	0	0	9	0	0	0	0	6	0	0	0	0	0
ENSG00000005108	25	393	0	82	13	0	70	13	153	2	3	115	29	89	17	1	28	22	63	0	89	0	16	37	0	0	5	0	158	30	0	1	22
ENSG00000005156	22	270	3	73	45	3	78	21	151	107	40	105	18	24	45	1	2	97	72	133	10	56	11	11	18	41	1	13	23	42	0	1	1
ENSG00000005175	44	594	29	189	64	76	158	187	199	4	114	137	147	102	101	23	17	216	183	355	47	88	50	82	54	69	36	83	85	153	133	93	38
ENSG00000005187	1	0	0	0	0	2	17	0	1	112	0	0	0	0	1	0	0	9	0	0	0	0	4	3	0	0	1	0	0	0	2	3	1
ENSG00000005189	0	0	0	36	0	1	0	11	2	152	7	0	6	0	8	1	0	1	1	144	20	18	0	5	0	0	0	0	1	7	0	4	1
ENSG00000005194	1	27	0	101	22	23	32	60	67	2	46	21	20	42	12	0	4	74	47	8	30	25	4	23	2	1	4	17	19	4	1	0	2
ENSG00000005206	12	378	24	392	56	81	194	152	189	418	48	35	40	105	127	1	8	125	254	283	144	18	79	36	26	66	24	23	97	64	5	45	9
ENSG00000005238	38	37	8	140	39	22	26	5	17	34	16	146	36	40	2	30	25	50	22	1	74	91	13	6	9	29	75	13	29	34	170	55	52
ENSG00000005243	0	0	0	4	1	15	22	1	32	0	5	0	0	0	22	0	0	0	0	0	20	0	0	0	0	3	0	5	16	0	0	6	0
ENSG00000005249	85	1213	8	491	163	210	405	353	409	394	89	160	290	313	186	16	18	757	227	5	168	135	208	205	41	139	56	78	455	110	47	31	14
ENSG00000005302	12	1	35	304	95	51	73	97	102	62	82	102	48	132	21	4	0	46	19	25	36	52	20	60	23	32	188	63	63	18	4	73	6
ENSG00000005339	94	1049	136	488	193	214	114	102	272	31	211	276	132	99	125	59	16	254	247	130	178	238	69	85	91	103	404	158	196	221	4	195	97
ENSG00000005379	0	1	0	150	10	26	76	62	21	155	1	1	13	0	71	0	0	25	137	342	40	9	4	14	12	23	3	16	16	34	29	12	2
ENSG00000005381	0	0	0	0	0	0	0	0	0	1	0	0	0	0	0	0	9	0	1	0	7	31	0	3	1	0	1	0	0	0	0	19	0
ENSG00000005421	0	0	0	0	0	1	0	0	0	0	0	0	0	0	2	0	0	0	0	0	7	26	0	0	0	0	0	0	0	15	0	0	0
ENSG00000005436	0	0	2	21	4	9	22	6	4	38	26	3	0	20	4	0	0	7	18	219	1	21	23	2	6	6	1	20	1	2	1	0	0
ENSG00000005448	19	30	29	354	11	23	222	76	63	314	3	231	1	1	96	1	0	30	173	1032	123	7	8	43	15	28	2	48	25	73	2	5	3
ENSG00000005469	34	670	1	98	124	33	114	85	68	39	110	9	85	154	80	0	3	167	91	273	128	46	116	31	18	84	18	40	198	31	64	1	2
ENSG00000005471	1	0	0	0	5	8	0	0	0	0	0	0	19	0	0	0	0	1	0	0	0	0	1	6	0	0	0	0	1	0	0	0	67
ENSG00000005483	149	1374	289	1100	567	276	308	486	582	274	428	331	397	561	234	67	79	696	440	891	334	543	331	260	207	204	729	352	398	362	182	574	192
ENSG00000005486	118	863	38	305	92	165	274	157	246	478	116	109	210	164	138	1	82	227	313	912	240	222	254	69	52	99	69	89	251	119	84	130	47
ENSG00000005700	24	1686	79	257	405	239	446	416	506	262	154	434	367	325	160	15	30	605	478	1181	198	182	338	178	169	247	139	128	429	266	73	25	30
ENSG00000005801	20	197	0	5	7	24	32	6	48	1	21	112	22	57	19	0	0	62	38	2	45	1	8	15	6	50	8	3	12	14	8	11	1
ENSG00000005810	77	735	34	386	148	95	380	224	291	39	131	53	144	273	226	6	12	260	294	955	146	131	95	56	71	121	79	121	216	120	53	59	20
ENSG00000005812	0	145	15	101	27	18	95	105	70	184	29	4	50	26	25	0	1	63	60	375	61	24	23	20	27	16	15	52	17	22	0	20	3
ENSG00000005844	16	1	16	61	10	44	16	10	1	1	14	25	43	2	5	17	1	3	0	1	17	43	20	4	19	3	95	25	0	25	1	64	32
ENSG00000005882	0	96	0	35	11	4	24	19	44	57	11	0	24	37	7	0	1	16	79	0	10	3	2	1	3	0	0	1	51	16	1	0	1
ENSG00000005884	2	95	0	112	28	33	42	13	34	0	71	0	28	0	19	1	3	79	40	1	2	3	85	13	5	18	5	8	55	15	37	13	6
ENSG00000005889	23	321	0	63	31	49	106	87	112	217	51	139	75	50	70	8	25	111	66	4	55	65	15	40	20	29	34	39	97	47	3	60	1
ENSG00000005893	122	1826	36	689	322	268	457	352	439	477	301	195	514	339	375	44	142	623	672	1070	241	467	318	207	205	422	729	282	428	200	372	538	154
ENSG00000006007	193	3046	108	758	415	406	515	540	642	1201	249	381	761	885	225	4	80	1075	638	952	429	501	535	237	108	360	131	218	966	385	325	290	70
ENSG00000006015	3	261	32	146	23	18	142	67	71	72	27	23	99	30	48	7	31	44	71	391	85	41	63	50	29	65	56	31	76	22	4	10	0
ENSG00000006016	0	1	1	101	9	19	15	70	24	62	4	3	0	0	39	0	0	19	3	461	6	0	2	9	6	5	4	29	17	5	25	19	0
ENSG00000006025	2	3	1	30	9	9	22	46	67	0	13	24	24	3	19	1	9	85	60	172	39	36	72	5	3	17	9	3	45	24	2	18	2
ENSG00000006042	29	964	14	178	47	29	235	251	245	430	31	50	106	43	185	0	40	246	458	643	183	24	127	63	130	197	11	47	60	69	156	17	3
ENSG00000006047	0	0	0	0	0	0	0	0	2	0	0	0	0	30	0	0	1	0	11	0	0	0	0	0	0	0	0	0	0	2	0	0	0
ENSG00000006062	0	46	7	19	4	11	0	19	23	1	18	1	0	0	7	0	0	15	46	0	0	23	2	2	0	0	5	1	28	10	0	21	22
ENSG00000006118	31	84	6	2	9	21	15	0	91	0	30	0	12	17	26	0	0	59	1	54	29	31	20	1	6	20	6	7	33	2	44	2	1
ENSG00000006125	17	142	46	176	22	21	192	182	146	379	42	133	16	12	38	19	14	292	167	835	153	113	108	79	47	50	35	59	47	134	20	101	54
ENSG00000006194	16	190	10	89	21	32	49	50	24	115	9	1	15	10	15	0	11	28	63	238	2	35	0	37	19	35	43	8	50	13	27	25	17
ENSG00000006210	12	104	0	50	20	30	56	31	35	43	2	2	12	1	47	0	10	57	165	199	44	0	85	5	16	6	11	14	3	22	36	1	1
ENSG00000006282	0	327	1	36	8	11	39	37	19	0	20	4	30	72	6	0	11	37	5	219	42	4	4	8	0	4	0	5	28	15	2	25	1
ENSG00000006327	1	266	3	22	64	89	39	51	185	15	56	11	46	137	45	14	42	240	118	311	130	66	155	52	10	13	80	42	105	57	220	110	60
ENSG00000006432	55	173	4	10	16	20	8	25	15	102	10	1	23	0	7	2	0	30	15	0	18	21	53	8	7	37	15	14	63	15	44	3	1
ENSG00000006451	24	937	34	223	175	93	171	87	180	177	193	174	113	184	107	23	77	448	226	121	271	238	170	86	86	80	135	102	435	151	111	102	5
ENSG00000006453	46	738	39	368	124	125	204	231	214	277	107	189	75	113	127	14	63	214	255	1294	238	158	195	73	33	125	57	77	203	134	139	54	1
ENSG00000006459	33	563	7	296	161	142	168	191	162	6	117	101	160	275	148	98	39	367	445	159	117	182	177	67	54	116	44	51	213	100	5	106	8
ENSG00000006468	0	0	3	0	0	0	16	0	1	120	14	0	1	1	7	0	0	39	90	0	2	0	2	0	0	0	9	1	1	8	1	3	0
ENSG00000006530	0	208	0	36	9	4	18	2	31	112	5	0	0	0	8	0	0	24	28	0	10	0	0	4	0	0	3	6	20	15	1	0	0
ENSG00000006534	56	505	72	1014	190	153	479	469	229	1263	74	179	105	372	177	4	51	325	956	3955	287	320	229	157	30	200	25	141	302	350	211	48	10
ENSG00000006555	8	114	0	10	23	7	35	25	32	47	9	68	7	0	14	0	0	30	7	87	50	32	0	4	8	13	4	2	33	21	0	14	1
ENSG00000006576	22	241	6	46	39	26	141	142	76	25	66	60	133	0	31	0	2	239	16	3	124	37	58	39	12	66	18	33	92	58	2	15	4
ENSG00000006606	7	0	0	15	25	0	0	17	1	0	8	0	0	0	0	0	0	18	0	0	2	13	7	0	0	13	32	0	1	0	0	0	0
ENSG00000006607	0	129	4	110	54	55	40	23	48	52	50	115	84	99	14	1	15	107	142	1	39	14	13	7	27	77	21	14	89	37	3	3	49
ENSG00000006611	0	0	39	58	2	0	10	15	1	91	0	0	0	0	0	0	0	10	0	0	11	0	0	11	0	0	0	1	0	0	2	0	0
ENSG00000006625	59	833	14	190	170	65	159	103	288	213	210	196	230	60	170	3	35	443	269	204	58	183	67	66	48	187	32	100	191	170	3	66	31
ENSG00000006634	10	165	1	0	18	39	6	26	24	0	25	6	48	1	21	0	0	54	9	0	18	1	28	22	12	28	23	29	46	23	0	5	2
ENSG00000006652	26	170	43	552	73	198	38	63	139	19	131	125	107	105	26	48	75	106	111	5	160	562	136	142	75	50	415	299	228	134	196	523	126
ENSG00000006695	0	1	0	1	13	5	8	18	27	0	3	41	7	23	33	0	0	27	64	37	6	0	20	9	3	29	2	12	47	14	1	1	1
ENSG00000006704	62	490	0	90	73	34	38	84	78	2	66	43	69	1	41	5	33	133	153	116	18	132	114	19	15	50	9	20	104	62	1	10	4
ENSG00000006712	27	494	33	156	60	50	97	87	87	196	26	43	89	12	57	10	15	37	120	5	65	63	28	46	44	36	113	74	78	47	142	49	5
ENSG00000006715	11	535	24	108	67	48	77	20	121	134	123	3	22	84	31	2	2	110	55	889	27	141	39	28	29	131	69	139	99	72	8	40	24
ENSG00000006740	0	74	6	156	26	13	30	0	24	1	0	0	2	0	2	10	35	38	27	74	7	0	0	12	9	36	0	20	0	0	1	7	0
ENSG00000006744	10	252	21	124	56	13	82	71	37	73	46	3	78	14	53	1	1	71	99	1	1	47	32	45	30	24	4	30	114	28	13	9	1
ENSG00000006747	6	961	7	264	120	76	192	337	211	687	105	64	105	198	84	1	39	176	371	932	100	82	100	92	41	218	11	82	203	114	7	10	7
ENSG00000006756	94	1919	56	625	112	177	540	451	570	236	161	310	171	222	266	7	72	496	573	685	150	109	120	183	68	122	33	81	149	144	75	59	11
ENSG00000006757	0	368	0	49	10	18	81	28	52	91	10	54	38	10	26	0	0	55	50	124	10	1	32	25	1	58	1	1	47	13	0	15	0
ENSG00000006831	11	1502	16	235	126	95	97	259	392	93	128	121	160	244	117	1	35	276	219	102	213	340	246	76	66	102	77	111	279	144	73	78	25
ENSG00000006837	0	0	0	4	0	3	0	0	0	0	8	0	13	0	0	0	0	17	1	11	9	0	0	6	0	2	1	0	26	3	0	0	0
ENSG00000007038	1	0	0	0	0	0	0	0	0	0	0	0	0	0	0	0	0	0	10	0	1	10	0	0	0	0	0	0	1	3	0	0	0
ENSG00000007047	14	230	26	33	36	44	55	0	81	88	17	2	105	17	18	0	0	19	33	26	44	1	35	5	8	7	7	11	31	10	52	13	30
ENSG00000007062	7	425	34	475	41	42	314	298	129	1062	35	330	67	135	225	2	72	125	391	455	141	28	135	50	59	132	20	74	29	127	63	13	19
ENSG00000007080	12	207	11	53	42	35	27	44	60	8	18	4	18	102	55	1	23	57	57	4	41	15	81	21	9	41	4	16	48	65	52	5	2
ENSG00000007129	0	1	2	1	0	0	0	0	0	0	0	27	0	0	0	6	0	0	0	0	0	52	1	0	2	0	13	0	0	2	1	0	0
ENSG00000007168	69	1047	27	245	115	99	256	245	342	336	131	163	278	184	136	0	41	458	252	1761	186	209	147	100	96	186	184	76	184	143	43	67	3
ENSG00000007171	0	40	5	8	6	6	14	7	0	0	18	1	22	50	13	0	0	17	0	128	0	0	25	2	22	77	2	3	1	9	2	1	0
ENSG00000007174	1	0	0	352	4	5	65	179	5	190	0	132	0	0	48	0	21	47	109	536	52	2	0	9	0	20	4	15	1	32	3	1	3
ENSG00000007202	20	535	42	254	98	19	122	97	241	168	63	139	119	150	81	2	7	161	96	68	100	166	115	79	72	96	26	94	231	79	4	13	6
ENSG00000007216	0	85	0	8	6	0	9	12	3	17	3	0	1	3	24	0	3	10	1	288	0	0	5	2	8	1	0	7	19	1	2	0	0
ENSG00000007237	32	23	33	87	5	7	6	37	8	3	12	0	50	96	6	3	12	37	15	133	35	32	20	18	32	5	187	51	17	25	2	45	34
ENSG00000007255	40	143	2	184	30	42	152	69	105	36	55	3	117	41	55	0	24	135	113	632	54	84	62	44	16	81	9	48	41	33	71	24	1
ENSG00000007264	0	0	4	0	0	0	0	1	28	0	6	0	0	0	0	0	0	0	0	0	0	0	0	1	4	0	2	0	0	0	0	0	0
ENSG00000007306	0	103	9	0	0	2	13	6	0	0	3	1	75	0	4	5	17	0	8	0	0	1	0	0	8	0	7	7	0	2	4	0	1
ENSG00000007341	0	13	0	1	15	3	11	6	31	1	2	1	0	1	15	0	0	18	19	0	5	1	1	12	2	2	7	0	6	14	1	2	1
ENSG00000007372	27	163	0	5	44	64	118	35	84	40	4	61	44	115	28	0	0	77	64	0	6	0	12	5	4	50	19	0	12	32	58	39	0
ENSG00000007376	1	42	8	20	6	20	28	2	17	0	26	51	28	1	3	0	0	21	21	0	43	32	35	10	4	1	10	29	37	21	1	12	1
ENSG00000007384	32	302	30	72	78	36	73	63	73	47	8	5	75	76	33	0	13	102	89	338	31	10	152	19	16	29	23	47	200	72	5	1	0
ENSG00000007392	51	500	2	140	89	56	96	86	120	104	51	79	85	147	62	0	2	142	137	126	35	93	59	28	36	41	35	27	66	69	53	33	2
ENSG00000007402	0	0	0	0	3	0	5	0	6	0	0	6	0	0	0	0	0	49	44	103	2	1	8	2	0	2	2	0	0	5	0	0	0
ENSG00000007516	1	2	12	244	4	8	28	50	5	68	0	129	0	1	26	14	2	12	46	513	10	1	11	4	2	18	12	19	0	50	26	25	0
ENSG00000007520	35	1165	58	157	68	62	124	195	208	39	52	5	114	64	104	0	27	207	49	261	178	59	95	58	66	54	65	70	80	102	6	59	3
ENSG00000007541	0	349	0	61	4	5	22	32	1	8	25	0	11	0	8	0	0	65	12	119	29	22	43	12	8	12	10	20	53	27	0	1	0
ENSG00000007545	10	64	8	101	17	9	62	46	88	99	10	30	36	35	13	1	12	67	129	566	71	1	49	12	5	41	13	14	101	24	2	11	0
ENSG00000007866	53	188	2	123	83	45	43	32	63	2	49	83	97	84	32	9	21	122	129	651	20	146	24	22	24	31	13	28	111	31	27	34	49
ENSG00000007923	1	43	0	65	15	3	27	15	27	73	9	42	25	11	18	0	15	37	92	64	63	23	25	7	11	15	2	24	41	30	110	6	1
ENSG00000007933	9	604	1	282	31	5	451	196	182	408	55	50	48	86	87	0	3	181	248	920	125	24	86	69	18	35	34	61	221	144	88	7	0
ENSG00000007944	96	506	29	138	108	115	86	115	131	278	44	270	104	190	58	20	72	153	85	655	120	102	86	38	87	85	209	105	264	101	134	142	106
ENSG00000007952	0	18	0	0	0	0	19	10	0	51	0	61	0	0	2	0	0	2	2	0	0	0	0	1	6	0	0	1	0	0	0	0	0
ENSG00000007968	2	96	0	12	1	2	20	8	47	1	37	0	29	21	1	0	0	2	0	2	34	86	2	5	4	1	1	0	37	1	0	0	0
ENSG00000008018	97	1383	37	556	301	184	456	489	515	490	553	229	382	500	278	54	43	839	536	1599	511	268	298	200	279	328	253	263	532	286	393	245	57
ENSG00000008083	119	1680	183	589	412	311	279	266	683	391	250	264	420	223	175	88	59	510	420	929	453	625	314	182	145	230	483	265	768	250	320	464	104
ENSG00000008086	7	297	26	44	20	21	27	58	28	172	20	3	18	2	22	2	0	28	34	138	18	79	31	7	32	16	92	34	34	33	18	15	4
ENSG00000008128	0	2	0	45	0	0	0	0	5	0	0	26	0	13	0	0	0	1	0	88	1	55	24	3	6	1	23	0	0	0	23	4	0
ENSG00000008130	64	339	9	63	28	35	13	102	3	34	9	20	16	42	60	29	4	33	59	0	71	133	22	40	26	35	90	91	94	40	127	200	75
ENSG00000008196	0	0	0	0	2	1	0	0	0	0	0	0	0	0	0	0	17	0	1	0	0	0	0	0	0	27	0	0	8	11	0	0	10
ENSG00000008197	0	0	0	0	7	0	0	0	0	0	0	0	0	0	0	0	0	0	0	0	0	0	0	0	0	0	0	7	0	0	0	0	0
ENSG00000008226	5	1	0	118	3	0	32	16	0	19	0	0	0	62	15	1	1	22	24	86	35	0	1	2	4	13	1	7	1	0	2	0	11
ENSG00000008256	19	269	3	54	13	35	47	5	59	16	29	4	67	0	18	2	12	93	130	178	45	24	14	23	6	28	33	15	33	18	1	10	1
ENSG00000008282	36	858	9	181	145	102	227	276	259	388	146	37	228	245	198	3	3	259	133	944	187	57	107	66	76	179	57	121	302	127	9	52	21
ENSG00000008283	132	1991	137	1504	297	190	903	905	835	920	366	404	384	524	388	13	59	651	819	2241	450	157	329	250	141	373	87	258	441	417	133	46	24
ENSG00000008294	104	1126	242	924	321	245	192	298	400	216	354	526	208	291	153	93	81	304	268	324	308	973	104	212	251	159	874	498	314	266	191	678	55
ENSG00000008311	0	0	18	46	10	8	31	5	21	0	11	29	6	1	1	0	0	19	13	0	13	0	1	10	0	9	11	0	0	4	0	1	2
ENSG00000008323	1	40	19	12	14	22	29	32	7	98	11	1	8	23	14	0	0	29	82	1	1	9	28	16	6	32	5	4	6	5	0	3	0
ENSG00000008324	0	213	2	71	36	47	80	58	17	2	21	0	43	44	66	0	1	36	92	117	23	30	75	39	19	47	28	20	76	52	0	2	25
ENSG00000008382	2	41	4	17	10	13	23	14	3	30	3	60	14	8	9	10	0	28	23	42	11	57	0	9	4	10	6	20	19	3	0	2	0
ENSG00000008394	22	1558	13	185	136	71	357	202	310	447	86	205	230	161	202	8	100	478	571	2552	222	48	343	110	59	329	24	69	258	105	319	31	27
ENSG00000008405	17	34	1	31	39	28	51	66	14	16	11	0	9	2	31	0	0	42	47	413	0	65	2	9	6	4	14	24	34	34	1	17	3
ENSG00000008438	0	0	0	0	0	0	0	0	0	0	0	0	0	0	0	15	0	0	0	0	0	15	0	1	3	0	16	15	0	5	0	7	0
ENSG00000008441	27	650	14	227	94	36	201	75	164	115	86	205	141	53	188	1	50	246	166	197	60	67	82	35	51	124	6	12	155	99	5	24	5
ENSG00000008513	42	967	47	240	118	65	134	117	146	29	159	113	215	116	64	10	29	171	284	156	188	249	140	64	52	124	271	127	171	91	122	164	93
ENSG00000008516	54	58	129	654	130	147	29	0	121	12	122	326	28	1	9	133	55	77	40	6	166	605	17	178	90	29	1326	418	15	126	446	1625	448
ENSG00000008517	19	2	0	9	0	19	0	0	1	0	11	0	10	0	19	5	6	41	1	0	4	16	57	0	5	0	5	8	2	33	2	0	0
ENSG00000008710	3	96	1	25	23	12	35	21	5	83	13	15	12	44	20	0	0	32	24	48	23	31	42	4	6	21	6	8	5	10	3	5	1
ENSG00000008735	0	0	0	9	0	3	0	0	15	0	10	1	0	0	4	0	0	11	1	0	0	0	17	0	0	0	0	0	0	17	0	1	0
ENSG00000008838	36	1335	35	548	153	124	307	235	448	377	99	323	160	169	136	1	91	284	240	836	149	21	134	93	80	110	33	48	174	151	102	19	17
ENSG00000008853	0	237	0	40	33	15	15	43	67	96	18	65	14	6	34	1	0	111	76	102	26	0	24	7	13	12	13	29	43	39	1	18	1
ENSG00000008869	27	260	8	87	27	47	87	51	68	200	40	26	58	35	47	0	0	78	83	0	51	13	104	9	21	24	5	17	63	19	1	7	3
ENSG00000008952	106	1993	113	834	469	272	681	564	751	650	342	671	533	807	408	27	72	632	760	1941	425	398	270	287	267	467	294	335	602	375	119	266	68
ENSG00000008988	363	9093	285	1988	1283	1062	2987	2509	3956	1819	3081	773	3109	1561	1994	68	325	3759	2571	6642	1310	1236	1269	988	1097	2712	645	1232	2239	1311	1292	724	154
ENSG00000009307	661	8439	362	2291	1365	1062	2303	2193	2513	2017	1383	1614	1805	1515	1462	88	458	2845	2452	6209	1268	1111	1013	804	724	1489	813	918	2471	1203	648	693	314
ENSG00000009335	69	552	25	119	94	119	200	169	262	117	142	121	154	118	114	32	29	272	366	248	122	193	191	66	50	156	46	85	161	98	51	36	14
ENSG00000009413	28	201	19	249	70	40	109	138	66	129	65	93	74	100	23	9	90	155	75	3	64	64	4	44	30	81	57	65	52	58	81	91	13
ENSG00000009709	30	402	2	146	50	29	255	51	276	229	8	92	40	148	82	5	4	282	97	199	101	18	91	56	12	115	14	63	79	90	2	24	1
ENSG00000009765	0	1	0	0	21	3	47	1	8	0	11	0	28	0	3	0	0	8	11	4	10	1	3	7	5	8	4	0	13	11	0	0	0
ENSG00000009780	37	115	0	105	15	30	36	72	55	1	8	18	40	1	51	1	23	61	17	268	64	13	14	7	22	33	10	2	54	42	1	4	0
ENSG00000009790	1	13	33	117	17	5	26	0	23	31	12	1	15	0	6	10	0	19	26	0	15	58	15	8	18	25	89	31	22	10	27	126	53
ENSG00000009830	1	169	7	413	22	34	105	157	112	318	21	67	24	41	86	0	1	136	218	555	129	1	18	52	11	49	13	10	38	68	64	18	13
ENSG00000009844	11	238	15	112	82	37	112	155	138	102	79	77	96	39	96	11	55	134	200	890	112	61	121	53	42	64	45	66	168	61	4	41	3
ENSG00000009950	2	0	0	0	0	1	0	1	0	0	0	0	0	18	0	4	0	1	0	0	3	0	0	0	3	2	1	1	8	0	0	0	0
ENSG00000009954	35	717	20	261	132	64	212	197	248	97	153	184	111	278	145	10	28	189	232	318	122	63	128	66	60	94	105	109	208	88	13	11	4
ENSG00000010017	9	286	9	147	71	85	110	140	99	58	62	2	168	170	54	0	3	87	37	313	40	157	66	24	29	56	87	37	73	63	3	17	5
ENSG00000010030	0	0	0	0	0	0	0	0	0	103	13	0	0	0	0	0	0	21	0	0	2	0	30	0	1	0	5	6	0	12	0	0	0
ENSG00000010072	1	82	0	45	34	2	45	45	59	0	13	62	43	30	10	7	1	59	62	179	60	8	2	13	12	1	29	5	39	32	2	35	6
ENSG00000010165	0	192	7	28	13	21	58	90	34	18	56	3	48	61	45	6	0	79	76	2	13	12	2	23	17	45	1	1	61	20	1	19	3
ENSG00000010219	11	200	0	0	3	8	27	10	21	28	10	1	30	33	16	0	0	45	41	0	48	14	21	15	9	22	0	0	1	10	0	1	0
ENSG00000010244	116	1378	96	595	309	245	411	451	575	548	372	104	386	350	187	11	81	440	536	1268	187	302	324	173	151	333	240	213	429	267	229	158	16
ENSG00000010256	20	441	8	108	74	48	116	10	81	339	116	157	61	98	64	0	13	161	118	134	178	62	128	62	18	71	20	35	190	36	19	48	4
ENSG00000010270	17	201	0	45	19	21	70	36	75	29	24	38	63	0	34	0	46	27	93	388	55	15	33	25	37	41	7	28	64	24	42	20	0
ENSG00000010278	386	4893	34	889	1758	616	1315	1349	1239	2598	1079	1473	1848	2543	1070	140	543	2342	2559	4328	1187	831	2600	421	298	2040	376	463	2362	500	1468	299	202
ENSG00000010292	2	35	1	26	10	23	31	19	44	20	3	1	8	0	11	0	0	19	20	5	11	26	11	7	5	31	1	0	3	10	3	0	1
ENSG00000010295	1	111	4	2	3	4	17	2	19	1	16	0	0	0	0	0	28	13	10	0	2	69	2	10	7	25	21	15	1	13	0	26	0
ENSG00000010310	0	110	0	69	10	25	22	11	20	84	9	0	0	0	25	0	0	26	103	353	30	1	26	4	8	19	3	0	20	21	1	2	0
ENSG00000010318	7	7	0	29	9	7	54	34	3	2	14	1	1	80	30	0	0	31	61	46	9	0	0	10	0	5	17	6	22	18	1	2	1
ENSG00000010322	1	30	9	80	29	30	55	29	91	55	18	54	19	0	47	1	0	44	52	129	52	33	18	14	24	31	13	7	92	36	0	11	4
ENSG00000010327	0	30	1	2	6	3	5	0	7	0	19	0	0	0	6	5	0	1	0	0	14	16	1	1	25	1	8	8	0	11	0	0	0
ENSG00000010361	1	0	3	58	1	12	1	9	2	108	0	0	0	0	5	0	0	6	0	0	0	5	0	5	1	8	20	22	0	0	1	7	0
ENSG00000010404	71	954	51	517	344	189	283	361	242	448	129	281	188	260	197	40	34	331	529	895	214	363	276	118	69	101	566	167	201	140	402	307	44
ENSG00000010438	3	0	18	9	22	22	0	28	23	0	19	0	8	17	9	2	8	28	16	0	1	12	4	5	4	11	15	16	21	30	0	9	2
ENSG00000010539	12	171	18	98	12	39	29	10	58	1	35	54	3	25	4	32	16	53	13	0	8	53	12	19	50	22	258	27	2	40	95	130	61
ENSG00000010610	0	71	0	5	1	1	19	2	17	1	6	39	0	0	0	0	1	19	56	0	1	8	0	3	5	0	6	6	1	0	0	8	0
ENSG00000010626	21	11	26	755	32	54	475	278	53	740	7	194	20	32	153	0	12	114	221	1605	200	10	49	101	10	62	19	120	18	315	6	13	5
ENSG00000010671	1	0	5	20	0	0	0	0	0	0	5	0	0	1	0	8	0	1	1	1	4	11	1	6	0	0	82	1	0	0	17	98	13
ENSG00000010704	0	4	4	24	0	6	4	27	1	23	12	2	1	34	7	0	0	20	18	0	19	3	11	0	10	1	0	0	21	0	1	0	1
ENSG00000010803	16	91	2	14	26	29	109	23	40	53	21	52	9	0	37	8	3	45	25	445	21	2	31	6	5	50	3	7	16	13	3	1	1
ENSG00000010810	1	113	0	54	3	6	17	0	29	0	10	0	25	0	6	0	0	45	37	2	0	1	2	0	0	1	15	9	1	0	0	2	1
ENSG00000010818	26	527	4	180	85	64	70	53	63	105	57	37	48	1	26	1	4	136	124	66	141	84	63	57	117	51	245	113	108	51	188	143	43
ENSG00000011007	2	425	3	71	92	49	131	99	98	344	46	108	30	28	43	0	15	129	221	449	34	24	89	34	42	104	38	42	104	44	80	11	3
ENSG00000011009	125	1719	107	599	251	240	407	288	524	489	283	312	342	358	262	55	124	500	540	3226	411	504	550	193	153	224	166	269	676	297	189	203	29
ENSG00000011021	4	4	13	16	19	7	4	20	1	118	17	16	16	26	1	0	0	34	114	241	7	0	57	1	3	1	52	4	12	19	2	5	1
ENSG00000011028	17	1	10	2	12	6	13	30	82	0	13	3	0	20	34	1	6	138	77	4	27	0	1	0	3	10	0	4	18	19	1	0	0
ENSG00000011105	21	404	9	66	41	34	127	58	151	69	54	10	146	83	79	8	37	232	250	636	73	28	54	22	15	37	7	26	136	15	2	1	1
ENSG00000011114	85	1559	34	411	81	144	220	229	196	275	126	194	134	188	142	26	49	256	202	633	90	90	46	96	96	158	54	149	128	147	44	131	6
ENSG00000011132	0	0	1	4	17	4	8	0	22	0	0	0	13	0	1	0	1	12	42	0	0	0	1	1	0	0	23	0	26	0	2	0	0
ENSG00000011143	1	274	1	67	16	2	86	18	4	144	15	1	10	2	29	0	28	39	129	144	35	13	74	8	11	39	0	14	17	26	2	0	1
ENSG00000011198	29	311	9	153	48	59	55	87	15	32	38	2	15	63	15	35	30	73	65	139	31	138	13	25	32	17	74	50	39	46	46	118	9
ENSG00000011201	17	1	0	0	0	0	1	11	0	1	18	0	0	0	14	0	0	20	0	0	1	0	4	1	0	20	0	0	0	6	0	1	0
ENSG00000011243	22	457	2	245	68	31	78	74	68	98	37	60	52	52	59	8	21	51	125	398	106	124	15	50	39	59	42	51	90	51	43	61	6
ENSG00000011258	7	222	10	55	14	8	29	13	40	123	26	75	0	0	15	16	37	26	50	1	15	73	3	6	15	1	7	19	26	11	14	15	3
ENSG00000011260	2	482	52	170	33	52	57	15	66	66	61	1	30	23	41	0	3	67	42	1	43	16	2	42	18	12	10	50	96	25	2	18	0
ENSG00000011275	14	797	22	148	32	62	78	90	85	42	62	131	66	37	69	0	27	129	259	476	106	73	63	41	25	43	37	59	71	15	3	17	5
ENSG00000011295	46	766	33	320	159	132	346	219	577	514	240	101	177	121	214	30	55	717	298	449	253	179	137	131	67	187	41	123	314	154	14	125	102
ENSG00000011304	110	1568	74	370	234	143	284	261	286	784	276	230	355	359	182	18	119	368	311	900	344	301	217	114	72	206	66	180	340	168	194	172	13
ENSG00000011332	0	0	0	0	0	0	0	1	0	0	4	7	0	1	4	0	7	0	0	94	1	0	0	4	0	0	0	0	1	0	0	0	0
ENSG00000011347	58	263	1	122	52	58	72	80	124	75	8	92	65	80	89	0	73	280	238	229	103	25	81	47	18	37	6	8	54	41	3	49	2
ENSG00000011376	1	83	8	34	0	0	20	24	31	0	27	1	51	39	24	0	0	43	9	183	1	1	18	6	14	5	2	8	17	28	6	6	1
ENSG00000011405	19	689	48	555	233	101	305	395	451	274	229	78	209	175	149	52	30	317	235	697	245	116	91	105	142	219	103	118	429	123	192	99	17
ENSG00000011422	223	652	209	1667	378	608	73	76	337	494	169	2099	91	57	62	649	391	461	136	181	651	2049	185	604	821	174	2242	797	133	273	2509	5882	1949
ENSG00000011426	1	0	0	11	7	0	12	0	13	0	52	0	11	66	11	2	2	21	5	153	0	15	2	20	5	19	6	14	2	15	2	1	1
ENSG00000011451	11	446	1	55	23	44	54	39	96	58	41	1	33	42	65	13	25	80	33	183	46	101	59	23	17	10	1	9	68	26	76	4	0
ENSG00000011454	70	962	69	331	156	146	268	185	282	247	118	173	217	184	151	7	88	325	344	625	123	211	134	85	58	226	63	108	315	121	72	123	59
ENSG00000011465	0	0	0	0	0	16	0	0	37	0	0	0	0	0	1	0	1	23	0	0	1	0	0	0	1	1	0	0	13	0	1	0	0
ENSG00000011478	4	0	0	10	1	2	1	23	11	3	0	0	0	21	0	0	5	0	12	0	1	0	0	3	0	3	0	9	16	0	0	0	0
ENSG00000011485	0	0	0	33	13	13	45	53	55	65	0	1	1	22	12	0	2	22	32	329	8	0	1	6	2	27	5	12	3	6	1	5	0
ENSG00000011523	1	312	0	80	26	9	38	33	43	4	65	0	33	16	25	0	27	47	0	2	8	31	39	13	4	12	19	25	65	4	1	0	2
ENSG00000011566	36	303	19	121	61	39	78	90	113	35	27	67	54	122	31	0	25	75	141	216	63	81	13	28	12	97	35	63	199	20	5	11	2
ENSG00000011600	27	77	84	368	104	106	26	44	75	9	101	295	73	1	41	47	21	108	13	6	125	483	9	125	192	75	1343	415	15	83	212	936	109
ENSG00000011638	18	740	3	137	67	47	89	46	166	49	28	2	188	257	32	9	20	45	187	315	88	81	30	25	49	33	42	25	50	37	35	16	1
ENSG00000011677	0	1	0	2	0	0	31	7	14	0	1	0	11	0	0	0	0	0	76	1	1	0	1	3	0	0	0	1	0	0	0	0	1
ENSG00000012048	1	113	8	72	9	10	15	1	37	1	40	87	11	1	10	8	27	27	3	206	11	62	12	27	11	6	24	36	18	27	3	25	104
ENSG00000012061	9	32	14	99	29	13	16	40	66	87	25	19	34	53	26	11	3	94	27	391	46	16	6	27	3	35	21	19	23	18	35	16	2
ENSG00000012124	0	0	0	0	0	1	0	0	9	0	6	1	3	0	3	4	0	1	0	0	0	0	0	0	5	11	1	0	0	0	0	0	1
ENSG00000012171	0	2	2	6	19	15	2	1	66	36	1	0	6	1	1	0	1	10	0	0	5	13	3	7	0	8	18	18	29	8	5	21	0
ENSG00000012174	6	539	0	6	2	15	59	48	40	12	13	20	41	41	15	0	12	58	14	185	34	55	1	15	12	17	1	12	18	16	1	14	17
ENSG00000012223	0	271	14	0	5	10	26	12	3	1	4	0	10	0	38	0	0	19	1	1	25	63	1	22	11	16	28	42	0	0	31	89	6
ENSG00000012232	0	50	5	55	20	13	22	0	24	125	15	32	3	0	18	5	1	20	85	267	19	36	35	9	11	7	41	21	50	23	3	71	4
ENSG00000012660	42	506	0	194	151	71	207	89	123	532	151	182	37	3	70	22	5	159	173	430	63	266	49	96	53	142	264	98	83	70	94	223	36
ENSG00000012779	15	209	4	60	5	33	0	34	13	45	16	86	0	0	1	2	1	1	2	2	25	65	24	19	12	1	133	12	0	9	47	114	80
ENSG00000012817	0	0	0	7	22	0	0	0	0	199	0	0	0	1	0	0	0	0	0	2	2	19	2	1	9	2	6	0	16	7	0	1	1
ENSG00000012822	0	47	0	48	36	26	45	43	14	3	28	32	12	9	19	0	20	13	27	1	33	24	25	4	18	13	12	63	27	27	1	2	0
ENSG00000012963	17	755	0	105	54	23	41	66	108	73	45	91	106	19	38	1	0	85	58	450	51	87	11	24	4	14	17	13	24	25	5	42	4
ENSG00000012983	20	1043	12	244	129	57	222	167	138	178	98	12	172	144	99	14	58	304	91	293	163	148	113	41	79	120	45	81	222	127	30	63	5
ENSG00000013016	0	165	21	10	5	6	45	1	0	77	18	36	6	2	16	11	0	7	43	77	0	14	1	3	3	16	18	0	42	0	0	0	0
ENSG00000013275	13	354	13	154	83	55	209	89	110	119	70	11	158	95	58	11	16	203	114	499	157	144	285	38	45	123	45	85	206	129	95	82	11
ENSG00000013288	52	351	17	94	52	36	110	77	241	193	22	40	81	124	41	0	1	210	98	334	37	30	67	34	18	65	41	47	122	46	49	78	45
ENSG00000013293	0	0	0	18	0	0	0	0	0	0	0	0	0	0	0	0	0	0	0	0	0	10	0	0	1	3	0	0	0	0	0	0	0
ENSG00000013297	0	0	0	0	2	0	8	0	17	0	0	0	0	1	0	0	0	23	0	0	0	0	1	0	0	0	5	2	2	1	0	11	0
ENSG00000013306	15	323	18	232	102	58	134	120	132	167	102	33	187	129	67	9	3	132	141	733	89	78	116	60	31	183	32	38	162	118	58	34	4
ENSG00000013364	83	790	29	272	143	130	193	180	205	435	159	79	188	113	105	7	36	293	395	1099	179	212	261	63	87	133	236	66	155	130	132	137	68
ENSG00000013374	77	2020	64	599	143	235	380	328	330	148	159	150	323	359	216	30	79	495	386	942	160	155	280	136	170	210	294	129	343	266	125	233	96
ENSG00000013375	10	236	0	100	36	1	55	78	91	76	39	3	34	32	46	0	0	38	113	16	37	1	20	6	19	53	11	13	64	24	0	13	0
ENSG00000013392	0	149	0	22	0	5	2	0	1	133	9	0	3	0	0	1	0	5	0	0	0	0	0	3	0	0	1	0	27	2	0	1	0
ENSG00000013441	27	573	43	424	150	164	312	195	362	145	199	227	163	116	67	72	94	350	668	783	154	539	204	90	146	196	282	308	246	166	220	437	139
ENSG00000013503	13	35	1	40	41	9	45	34	116	67	45	59	50	0	29	1	17	84	30	154	11	0	18	14	24	45	1	4	50	5	43	2	3
ENSG00000013523	1	32	0	8	7	9	10	0	13	66	5	1	11	0	3	0	0	25	29	176	7	0	20	0	0	12	1	0	0	5	1	1	0
ENSG00000013561	17	131	0	146	52	28	130	124	175	168	52	70	85	86	81	15	19	136	124	440	34	5	106	35	28	124	10	30	106	57	31	11	29
ENSG00000013563	11	37	0	102	13	34	28	46	35	5	23	0	28	2	22	0	1	8	20	81	29	7	0	3	3	3	22	8	38	29	1	16	0
ENSG00000013573	1	0	0	45	38	42	8	6	9	20	24	2	39	39	23	1	2	101	1	381	64	20	1	5	3	17	1	1	44	19	0	0	1
ENSG00000013583	5	127	2	34	23	14	72	19	187	1	3	19	44	88	21	3	1	78	40	308	33	37	31	37	30	56	19	6	61	11	58	48	19
ENSG00000013588	129	3250	102	752	658	402	520	512	722	605	616	178	443	658	190	75	44	453	752	952	708	912	481	233	148	289	273	279	987	395	324	204	95
ENSG00000013725	0	146	0	0	0	0	2	0	4	0	0	13	0	0	0	0	0	17	43	0	1	58	11	2	22	0	1	1	0	0	1	0	0
ENSG00000013810	15	69	7	202	56	41	45	18	93	77	25	24	38	68	23	77	50	171	20	344	89	316	117	53	30	46	373	63	50	47	147	407	280
ENSG00000014123	61	891	26	157	109	69	263	177	177	418	160	87	113	124	151	7	25	215	281	1094	158	94	69	83	51	66	15	73	233	81	71	42	3
ENSG00000014138	22	128	0	87	14	5	37	5	36	2	8	0	10	10	32	0	10	41	50	47	60	9	2	13	4	11	0	1	39	17	1	0	0
ENSG00000014164	16	137	0	0	7	7	4	1	1	0	16	0	8	0	7	0	0	5	17	0	28	1	1	6	4	1	13	0	8	4	0	14	25
ENSG00000014216	84	1660	23	337	279	223	426	158	441	370	190	235	257	309	267	52	99	943	540	1199	528	174	442	94	88	165	89	62	367	157	210	109	45
ENSG00000014257	0	0	1	14	22	6	11	12	41	2	16	1	19	16	16	0	30	51	0	80	6	34	21	1	14	13	20	7	31	35	0	43	0
ENSG00000014641	26	505	2	275	154	61	284	359	170	263	162	39	260	113	171	0	64	276	162	273	114	26	112	98	86	198	43	85	163	124	65	22	50
ENSG00000014824	18	359	20	104	88	95	112	191	160	150	97	35	99	161	140	3	2	193	207	146	16	93	39	57	50	133	30	43	162	54	127	58	0
ENSG00000014914	0	0	0	16	0	11	0	8	8	0	0	0	0	0	2	0	1	4	0	0	0	0	0	2	0	0	0	0	0	0	0	1	0
ENSG00000014919	0	1	10	24	31	17	37	26	30	118	24	17	42	82	17	0	2	19	63	63	81	15	54	6	4	21	20	3	23	5	1	7	2
ENSG00000015133	63	434	44	562	118	58	219	267	275	233	119	45	34	70	87	12	60	275	288	933	184	104	85	59	56	41	37	61	156	139	8	44	18
ENSG00000015153	11	177	3	58	21	38	63	70	57	1	16	35	44	77	54	1	0	39	0	109	19	37	1	17	16	16	43	36	63	36	1	8	0
ENSG00000015171	38	685	15	275	80	117	240	214	364	598	232	196	132	128	186	3	9	259	263	991	84	64	5	117	81	132	28	118	337	146	13	12	5
ENSG00000015285	43	146	71	93	36	19	12	4	28	1	38	128	0	0	10	73	10	73	29	112	56	102	14	36	43	8	212	91	26	44	0	199	139
ENSG00000015475	1	225	62	113	39	36	80	83	43	98	63	0	54	10	41	26	27	87	102	1	96	161	65	58	57	26	341	161	58	107	50	167	108
ENSG00000015479	139	1303	102	747	218	196	387	331	421	389	389	324	294	232	302	18	88	534	348	1275	142	312	226	208	108	153	133	152	350	250	89	206	16
ENSG00000015532	2	209	19	48	20	16	55	20	32	8	17	0	17	2	22	1	8	23	50	85	32	11	17	34	14	55	2	4	58	30	3	8	0
ENSG00000015676	22	733	5	121	53	68	173	141	172	301	48	91	102	159	118	7	41	132	201	532	83	56	153	72	37	56	37	80	125	114	139	36	6
ENSG00000016082	11	200	2	61	9	15	55	34	68	82	12	0	2	0	8	0	0	51	30	0	19	14	2	4	3	5	1	31	48	0	2	14	0
ENSG00000016391	29	236	14	24	9	12	21	27	47	0	1	72	5	72	8	0	1	85	29	1	16	0	9	8	6	39	10	12	41	3	0	12	61
ENSG00000016402	2	704	21	284	72	24	92	168	154	166	72	36	82	103	89	0	52	254	231	338	105	74	94	58	32	75	4	48	71	56	77	2	6
ENSG00000016602	48	2	32	280	114	16	130	58	50	1	307	0	46	16	64	12	34	44	26	2	24	187	14	19	42	163	45	102	70	57	214	8	1
ENSG00000016864	3	344	1	93	31	24	101	55	25	29	36	35	60	15	75	0	22	14	134	568	52	3	14	45	9	31	11	11	38	60	98	1	2
ENSG00000017260	61	434	3	126	128	74	139	211	199	467	92	74	155	187	71	1	27	243	246	195	140	48	97	39	83	141	43	58	224	102	49	35	10
ENSG00000017427	16	100	4	64	132	2	43	20	40	1	19	87	60	1	22	0	0	22	29	0	62	48	2	10	16	27	2	24	27	20	3	3	99
ENSG00000017483	1	0	0	0	2	9	0	0	12	0	15	1	0	0	0	0	0	23	19	1	1	0	15	0	1	5	0	3	4	4	0	0	0
ENSG00000017797	79	1333	80	484	256	212	278	155	382	364	227	254	221	254	184	13	4	305	250	974	182	184	148	131	93	137	211	113	248	151	260	221	152
ENSG00000018189	29	313	15	184	99	70	98	221	193	92	101	24	83	230	83	17	34	250	124	632	91	72	60	37	33	103	21	56	94	80	8	24	36
ENSG00000018236	0	0	0	0	9	0	9	0	0	0	0	0	0	0	0	0	0	0	0	0	0	0	0	0	0	2	0	0	0	0	0	0	0
ENSG00000018280	62	217	295	562	106	156	13	15	46	29	168	426	5	1	15	218	64	75	77	3	121	937	34	119	93	51	1422	373	30	134	402	1085	274
ENSG00000018408	31	382	1	62	58	42	103	132	170	191	90	75	85	37	63	0	2	159	7	229	96	69	136	18	41	105	25	49	120	55	67	15	26
ENSG00000018510	6	220	5	33	29	32	42	80	102	142	31	104	23	0	36	0	2	75	108	47	11	36	67	12	20	16	4	38	52	31	4	2	3
ENSG00000018610	0	14	5	52	37	30	34	49	150	92	51	69	26	112	65	0	3	45	49	4	22	39	67	27	19	33	2	37	107	8	1	18	0
ENSG00000018699	0	105	1	30	14	17	21	29	52	0	22	83	22	34	18	0	22	31	14	1	23	23	1	0	3	1	1	15	17	17	2	1	1
ENSG00000018869	0	0	0	22	0	0	0	0	0	0	0	0	0	0	8	0	0	1	16	0	0	0	0	0	0	19	0	1	18	0	0	0	0
ENSG00000019102	81	3625	57	361	417	164	583	439	572	238	113	34	351	509	195	2	196	347	742	1514	547	245	405	183	238	430	94	173	569	372	66	28	17
ENSG00000019144	0	2	0	1	7	1	0	0	21	0	2	0	0	0	0	6	0	18	0	0	2	0	4	4	4	0	0	1	10	0	62	0	0
ENSG00000019186	0	0	0	21	0	10	12	0	21	75	4	0	5	0	7	0	1	53	0	0	2	0	27	0	2	20	0	9	0	2	2	0	1
ENSG00000019485	0	57	0	2	4	0	0	1	15	42	16	0	2	0	1	0	0	0	3	2	0	1	1	7	5	0	1	0	6	3	49	0	0
ENSG00000019549	0	0	1	0	3	14	0	0	25	0	6	1	4	0	19	0	0	65	0	0	1	1	0	0	0	10	0	5	0	0	0	1	0
ENSG00000019582	487	5011	111	750	270	521	1152	514	1290	1313	401	678	660	290	649	6	70	583	1279	1702	893	474	357	460	671	360	243	196	611	528	250	492	53
ENSG00000019991	0	0	0	0	0	0	8	0	0	0	0	37	0	12	11	0	0	1	0	0	2	0	0	0	0	2	0	0	0	0	0	0	0
ENSG00000019995	7	200	57	162	65	34	89	76	134	1	69	1	74	118	25	27	3	57	100	1009	52	149	46	27	36	46	117	59	42	47	31	12	18
ENSG00000020129	1	0	0	0	9	0	0	2	16	0	0	0	0	7	4	0	0	6	21	0	1	0	26	0	0	15	0	1	0	19	0	1	0
ENSG00000020181	1	0	1	0	1	0	0	0	0	0	2	0	0	1	0	0	0	18	0	0	1	0	33	0	0	1	1	0	14	0	0	0	0
ENSG00000020256	0	71	0	37	17	6	34	15	20	171	6	0	3	0	18	24	0	49	1	169	40	17	0	11	7	31	5	9	4	3	2	4	1
ENSG00000020426	2	474	14	114	65	48	114	170	55	90	99	103	61	110	74	0	26	87	48	334	26	31	37	28	20	40	9	44	71	44	2	2	4
ENSG00000020577	0	85	1	112	4	20	2	5	59	0	9	28	2	0	4	0	0	51	12	257	1	9	15	1	9	43	1	23	13	10	3	11	33
ENSG00000020633	72	1076	48	116	58	96	170	108	228	56	228	78	179	78	134	35	50	142	211	90	129	124	5	35	108	191	66	42	257	50	24	158	28
ENSG00000020922	108	447	5	171	70	76	142	160	144	44	57	145	33	185	69	2	5	179	241	79	82	79	53	37	45	60	40	1	172	70	42	28	35
ENSG00000021300	0	0	0	15	0	1	0	17	1	52	0	0	1	0	4	0	0	0	0	1	0	0	0	0	1	24	2	8	1	6	2	0	0
ENSG00000021355	118	1925	191	930	330	452	349	298	624	716	757	485	530	169	197	195	76	489	364	447	394	737	262	208	593	292	3510	650	347	469	525	1084	357
ENSG00000021574	0	194	24	116	47	32	53	88	87	83	57	171	29	28	65	3	0	52	108	296	65	37	3	10	1	34	27	48	118	42	205	78	1
ENSG00000021645	0	0	0	0	1	0	9	29	0	0	0	0	0	0	0	15	0	0	0	245	0	0	0	1	0	2	0	22	0	6	0	1	40
ENSG00000021762	4	296	1	113	31	41	94	26	119	10	39	81	115	101	55	1	22	131	142	293	45	31	47	15	19	43	22	34	25	14	34	12	1
ENSG00000021776	47	319	13	198	96	84	159	49	344	320	62	2	156	108	114	13	7	221	222	558	216	49	40	20	30	72	25	66	108	59	52	10	21
ENSG00000021826	2	1	2	0	2	0	0	27	0	0	2	0	0	6	2	0	2	0	0	2	3	1	0	0	0	0	1	0	0	1	1	0	0
ENSG00000022267	0	0	1	0	0	0	7	0	9	0	0	1	0	1	0	0	0	1	0	1	25	0	1	5	0	0	0	8	4	0	2	0	1
ENSG00000022277	49	565	123	351	132	132	104	121	226	51	204	150	201	149	52	34	10	140	102	344	160	337	76	92	87	116	391	182	144	223	153	392	48
ENSG00000022355	8	3	0	0	8	0	3	0	9	0	0	0	1	1	5	0	0	0	1	0	0	0	0	0	1	0	3	0	0	2	0	11	0
ENSG00000022556	0	0	0	0	1	4	0	0	0	0	9	0	0	0	8	0	0	2	0	0	0	0	0	0	5	0	0	0	3	0	0	0	0
ENSG00000022567	6	227	22	142	81	38	80	83	100	290	23	99	39	20	50	0	53	58	201	364	45	150	141	27	24	25	98	6	66	43	162	138	31
ENSG00000022840	223	1728	165	679	292	262	387	236	462	633	228	248	257	325	166	41	171	652	634	840	635	431	264	170	156	260	506	205	470	282	158	474	180
ENSG00000022976	26	53	0	126	31	9	23	59	91	188	21	92	49	25	2	0	2	82	45	477	96	0	16	16	12	76	13	7	45	1	4	16	4
ENSG00000023041	11	508	5	103	53	24	45	56	143	39	33	9	61	67	25	0	24	25	107	1	29	105	15	25	26	44	27	36	58	40	3	9	1
ENSG00000023171	1	0	1	49	10	38	31	64	49	1	15	0	0	0	11	5	10	29	41	4	14	17	21	20	21	17	1	3	75	32	1	11	0
ENSG00000023191	38	454	4	114	80	50	83	111	193	171	80	39	107	57	70	2	66	132	190	359	168	55	123	38	27	131	34	41	113	19	73	12	5
ENSG00000023228	25	892	22	318	98	85	162	215	176	409	106	104	101	204	155	0	4	212	206	352	64	3	104	68	71	82	49	43	194	107	9	32	15
ENSG00000023287	99	1613	117	924	220	241	349	482	766	518	318	155	566	247	165	36	107	482	334	843	201	419	225	223	169	384	544	359	387	238	105	235	46
ENSG00000023318	61	743	18	132	125	69	146	112	250	153	59	251	184	37	81	2	49	217	204	171	153	113	82	47	42	80	111	43	146	67	63	49	6
ENSG00000023330	33	160	9	73	49	45	45	6	59	169	11	0	103	32	24	0	28	128	145	153	52	1	62	20	22	17	22	7	70	10	1	33	1
ENSG00000023445	12	1197	38	229	58	101	72	199	202	124	84	84	133	45	75	20	10	127	196	133	160	195	98	86	109	83	288	76	121	118	149	67	99
ENSG00000023516	46	396	42	126	90	28	82	188	220	377	45	76	124	292	71	1	5	81	124	222	38	68	82	36	28	58	37	14	138	89	4	42	5
ENSG00000023572	24	80	0	40	30	21	53	22	40	1	33	19	18	0	6	0	0	42	13	1	12	23	0	4	8	15	0	27	23	19	49	0	36
ENSG00000023608	0	59	0	190	24	40	57	109	31	1	14	20	14	1	34	0	2	83	37	570	56	86	28	29	53	30	24	44	57	25	3	70	53
ENSG00000023697	45	195	1	33	99	30	65	33	71	166	25	145	82	51	26	0	0	73	87	1	37	40	55	12	39	77	29	9	111	33	3	5	0
ENSG00000023734	44	1118	6	293	187	138	249	190	284	272	176	223	261	119	130	12	64	341	370	1006	120	143	182	94	64	215	91	103	257	118	390	79	2
ENSG00000023892	0	87	10	68	36	4	10	23	0	106	32	0	21	18	10	0	1	41	9	1	34	49	2	16	20	14	50	13	6	37	0	48	31
ENSG00000023902	35	163	36	182	53	92	39	47	72	69	98	306	63	3	15	64	3	119	2	2	79	309	48	71	91	42	224	51	59	51	148	376	105
ENSG00000023909	102	1263	44	662	207	261	675	565	614	1009	232	435	387	518	315	12	86	684	914	1558	175	236	446	170	123	288	124	194	464	308	28	172	15
ENSG00000024048	70	579	40	366	135	74	69	182	96	152	74	152	97	140	68	36	0	182	210	548	68	167	61	65	60	52	233	200	151	103	48	124	90
ENSG00000024422	13	0	0	13	12	0	0	0	23	0	7	0	0	0	1	0	1	9	0	0	19	0	27	0	1	0	0	1	12	0	0	6	0
ENSG00000024526	3	27	1	0	3	3	3	1	1	0	0	0	0	0	0	0	0	2	0	1	40	0	0	0	0	19	0	0	2	1	1	0	0
ENSG00000024862	29	320	34	303	116	50	213	170	107	112	38	142	49	210	84	0	33	96	189	144	94	64	25	73	35	79	41	50	111	102	101	102	27
ENSG00000025039	9	269	32	220	117	82	180	121	132	117	134	171	75	116	105	0	26	101	126	81	120	110	40	91	85	125	41	64	131	92	27	11	9
ENSG00000025156	34	497	13	161	34	66	235	188	110	256	28	107	120	98	71	6	3	261	71	580	108	109	86	38	14	74	22	41	126	57	173	59	7
ENSG00000025293	0	603	47	176	111	48	91	144	76	191	55	64	90	56	59	10	46	153	133	234	45	160	48	45	74	119	99	82	62	69	5	87	114
ENSG00000025434	0	52	0	1	1	11	5	4	16	0	5	0	0	0	9	0	7	27	16	97	15	0	0	16	5	12	5	0	26	16	1	2	1
ENSG00000025708	116	957	213	809	213	409	182	183	271	202	241	454	181	136	109	117	1	162	196	200	223	596	292	174	249	111	983	448	157	273	522	614	168
ENSG00000025770	11	96	4	113	39	19	62	27	119	83	42	88	56	51	42	0	56	79	130	201	55	82	53	19	32	28	23	28	39	55	3	36	22
ENSG00000025772	36	445	10	271	31	67	246	185	91	180	61	209	106	109	63	1	56	181	211	1697	125	43	145	69	11	68	6	50	96	53	10	6	2
ENSG00000025796	157	1151	52	345	209	174	403	331	392	624	163	132	261	277	227	2	45	559	659	1072	161	52	233	135	127	329	105	111	311	198	18	34	46
ENSG00000025800	93	734	56	494	163	175	361	289	549	148	200	183	310	219	164	37	52	269	447	2425	148	142	181	113	78	147	71	96	454	225	109	49	17
ENSG00000026025	84	547	94	203	50	152	28	18	239	3	63	183	111	112	77	40	9	174	76	10	112	223	27	83	99	135	430	115	115	113	8	198	58
ENSG00000026103	0	0	5	32	1	24	0	2	0	137	10	3	0	0	13	5	0	20	18	0	7	5	23	8	13	8	116	26	11	27	4	44	0
ENSG00000026297	97	899	29	256	81	156	86	110	165	26	62	394	98	66	77	42	17	164	260	909	100	476	68	110	90	112	501	123	205	96	295	765	49
ENSG00000026508	96	1117	157	467	516	236	230	171	739	207	774	184	245	268	193	38	46	549	153	1152	264	562	221	159	278	353	1050	392	358	202	343	700	247
ENSG00000026559	1	0	0	0	0	11	17	0	0	0	3	0	0	14	0	0	1	10	1	1	0	0	0	0	0	0	7	0	0	0	0	0	1
ENSG00000026652	0	0	0	4	12	23	34	6	0	0	31	0	7	0	13	0	0	17	47	3	9	0	15	0	1	0	3	4	5	9	3	4	0
ENSG00000026751	0	1	17	64	25	32	31	3	19	0	22	0	30	27	6	0	0	42	43	1	16	57	41	8	100	1	25	4	15	7	19	40	8
ENSG00000026950	28	119	6	51	34	37	113	5	62	9	6	29	7	74	19	1	0	29	29	440	30	43	1	28	16	25	69	44	33	52	1	59	84
ENSG00000027001	10	73	2	99	37	29	84	80	12	118	17	52	14	2	61	1	10	34	185	324	46	6	36	17	3	44	0	20	53	17	1	2	2
ENSG00000027075	25	123	16	47	40	9	24	32	28	136	12	50	31	0	26	3	4	61	17	0	10	34	3	21	11	30	55	14	62	9	0	33	2
ENSG00000027697	39	848	2	275	64	67	123	89	142	150	65	234	211	183	77	47	68	82	85	117	135	187	104	86	86	77	704	107	146	52	153	253	86
ENSG00000027847	16	169	16	60	13	56	96	68	134	56	36	161	49	2	116	0	1	145	129	672	39	80	27	36	26	52	9	22	95	76	65	21	5
ENSG00000027869	0	0	0	0	3	5	0	1	0	0	2	0	12	0	1	0	0	3	0	0	1	1	26	0	16	17	0	0	1	0	0	0	0
ENSG00000028116	80	414	42	225	74	48	133	131	111	195	92	38	42	164	97	1	0	94	115	368	106	71	76	41	33	127	29	41	97	73	49	85	46
ENSG00000028137	118	730	438	1476	211	405	60	38	230	233	326	705	125	29	61	309	117	107	147	85	234	1240	43	291	743	110	3585	934	97	329	931	2792	1019
ENSG00000028203	3	465	0	51	65	64	117	108	103	436	132	3	82	45	82	0	3	136	65	61	73	25	46	47	76	75	36	32	165	65	45	17	3
ENSG00000028277	25	3	47	72	40	39	17	19	39	3	43	27	19	1	35	22	50	106	23	120	79	41	13	2	35	19	101	68	25	37	146	65	92
ENSG00000028310	26	607	37	185	122	67	126	73	141	218	87	61	104	19	58	0	5	208	116	623	85	165	35	38	43	65	31	97	92	100	51	80	7
ENSG00000028528	85	1002	20	202	176	72	252	194	242	401	85	117	257	135	107	6	26	366	262	178	208	94	125	85	61	214	69	74	221	82	7	139	22
ENSG00000028839	12	90	0	7	6	5	15	2	47	36	12	0	30	20	14	0	1	21	0	0	38	0	0	8	8	28	6	0	14	8	0	22	1
ENSG00000029153	24	62	17	116	60	23	46	69	95	1	83	141	86	62	51	22	30	79	75	425	60	111	35	38	37	34	45	109	60	77	2	7	2
ENSG00000029363	78	1614	76	690	149	173	303	563	451	448	242	453	275	303	290	16	93	385	386	1190	264	239	161	154	150	286	445	153	397	196	76	156	21
ENSG00000029364	3	884	10	221	121	56	153	167	333	286	66	57	217	38	98	1	17	86	226	394	122	100	93	39	29	125	61	43	313	61	2	48	3
ENSG00000029534	1	39	4	7	13	0	17	8	1	0	11	39	3	0	11	0	0	19	25	218	21	13	0	8	1	9	0	6	12	12	0	8	24
ENSG00000029639	0	0	1	10	17	10	8	49	0	90	22	0	13	0	9	12	0	3	13	127	7	0	10	0	1	22	12	3	20	7	0	0	0
ENSG00000029725	13	184	21	204	40	41	126	104	81	86	58	23	62	127	65	0	1	157	149	303	46	70	95	72	33	64	60	66	105	50	2	24	57
ENSG00000029993	24	314	40	44	28	51	114	180	140	33	118	56	84	67	49	3	29	116	130	464	97	34	77	46	78	122	18	39	136	58	2	1	1
ENSG00000030066	17	79	1	27	37	22	32	16	7	145	18	21	66	17	5	0	1	33	131	328	31	80	55	12	0	41	1	8	39	21	86	11	44
ENSG00000030110	1	332	13	38	15	19	108	35	46	33	43	39	88	7	16	7	11	145	19	351	86	85	39	12	21	63	62	28	36	42	91	10	0
ENSG00000030419	119	1030	44	428	335	152	376	522	395	378	210	285	451	428	229	29	96	420	796	1414	319	366	223	113	110	229	59	149	423	209	42	40	16
ENSG00000030582	327	4708	181	1051	561	717	1398	505	1638	534	642	463	818	1035	502	103	172	2266	1395	2316	1528	856	956	620	432	488	574	417	1377	644	392	952	220
ENSG00000031003	16	518	1	122	66	53	104	42	121	34	56	248	97	7	37	0	18	129	64	395	55	48	36	39	64	80	106	51	98	48	37	51	18
ENSG00000031081	0	119	1	0	0	5	23	0	40	0	16	1	5	0	13	0	14	13	12	2	0	42	71	12	6	6	0	3	14	21	1	39	1
ENSG00000031691	0	76	4	33	11	10	46	25	12	46	32	5	40	0	11	0	0	4	51	292	2	39	130	10	10	18	3	4	26	21	3	1	0
ENSG00000031698	59	820	35	192	145	98	144	190	302	5	138	158	127	249	116	8	21	227	100	327	128	32	42	69	19	89	46	108	185	110	7	70	14
ENSG00000031823	17	216	10	111	89	57	54	32	122	20	25	63	63	103	31	0	1	150	138	273	125	87	34	24	8	36	18	9	24	33	38	18	28
ENSG00000032219	40	340	75	349	149	174	161	206	176	197	150	326	77	38	67	24	9	218	198	273	151	308	121	92	82	42	341	206	356	133	121	193	13
ENSG00000032389	8	253	14	77	40	29	54	59	76	22	32	86	20	36	55	0	1	61	112	893	48	20	71	25	11	20	12	30	22	28	43	3	2
ENSG00000032444	3	19	0	50	8	11	8	9	40	1	7	28	5	2	11	0	13	10	13	0	13	1	0	3	2	1	23	13	15	9	0	6	0
ENSG00000032742	1	152	0	483	62	68	80	86	43	140	13	36	5	0	47	5	6	112	82	417	61	23	31	27	5	58	42	70	29	43	6	2	17
ENSG00000033011	13	119	1	62	28	22	47	25	102	1	31	34	47	7	19	0	1	23	3	109	48	0	25	15	4	0	5	19	52	11	1	0	0
ENSG00000033030	1	297	0	100	72	26	58	86	69	79	51	65	64	88	41	2	18	143	104	327	17	87	131	28	46	38	19	28	24	36	12	15	85
ENSG00000033050	1	140	6	60	77	16	115	55	48	1	36	2	36	60	39	0	11	83	40	71	23	10	4	10	4	17	4	46	61	62	2	11	10
ENSG00000033100	15	205	16	83	84	55	88	16	95	184	36	2	37	42	40	0	9	97	40	86	26	33	57	25	18	43	32	28	159	54	44	73	8
ENSG00000033170	15	214	0	18	23	6	45	20	12	0	29	1	10	63	4	6	1	24	23	37	11	43	3	22	11	21	3	11	82	38	1	0	1
ENSG00000033178	92	1522	9	241	340	191	260	270	265	41	276	112	279	254	132	4	21	390	281	1031	223	169	206	105	160	143	122	138	593	213	52	44	47
ENSG00000033327	33	131	68	341	65	103	51	14	100	272	64	82	60	7	52	79	11	99	94	109	44	292	40	68	69	44	388	113	56	70	12	356	224
ENSG00000033627	59	556	40	76	59	57	77	95	56	27	50	0	45	36	25	7	35	79	137	103	47	82	16	13	12	27	24	14	73	22	35	44	59
ENSG00000033800	4	77	30	267	114	60	115	86	131	68	56	178	120	266	131	24	12	245	212	481	106	131	115	59	81	91	262	164	155	89	92	120	42
ENSG00000033867	24	566	20	130	62	108	156	84	255	130	173	3	127	71	74	6	3	114	80	17	77	33	2	63	38	133	45	44	219	72	5	37	1
ENSG00000034152	147	1808	106	725	316	278	417	199	442	391	327	625	530	570	167	262	341	555	758	1632	778	1298	500	300	180	198	638	293	539	274	670	1242	679
ENSG00000034239	13	2	28	420	8	42	201	389	19	445	4	1	2	2	114	1	11	47	270	963	97	3	0	37	1	2	2	55	1	117	8	6	3
ENSG00000034510	330	6664	121	836	753	601	812	1146	1936	1028	1093	651	1856	809	495	63	312	1445	1771	3592	1196	1530	1148	529	1126	849	714	743	1152	779	926	671	204
ENSG00000034533	0	75	0	0	1	0	32	63	11	0	12	0	0	0	2	0	0	5	0	0	1	4	0	8	3	0	1	0	41	3	0	0	1
ENSG00000034677	192	1536	137	569	238	192	242	349	414	329	226	135	376	495	193	2	40	383	392	796	221	283	195	92	100	144	98	187	379	272	159	85	10
ENSG00000034693	0	153	2	4	8	12	73	58	16	146	12	117	19	31	30	0	1	27	62	194	1	20	0	10	11	20	3	14	16	23	0	1	3
ENSG00000034713	42	1239	20	375	166	138	248	391	307	586	112	234	303	471	216	73	161	486	593	1423	371	666	321	120	184	201	225	190	478	198	251	401	68
ENSG00000035115	57	226	6	81	63	48	140	110	156	264	72	55	177	235	150	29	2	212	184	95	16	98	136	86	41	114	18	28	57	69	3	30	12
ENSG00000035141	15	402	3	97	54	43	79	65	125	78	91	52	70	115	69	0	11	150	101	118	64	68	151	43	25	90	24	9	158	33	158	13	3
ENSG00000035403	97	862	28	230	99	113	116	194	295	123	128	38	76	292	75	3	39	212	270	488	93	120	109	72	12	125	57	72	359	126	104	119	4
ENSG00000035499	0	0	0	0	3	0	8	0	1	0	0	0	35	0	3	0	0	0	0	0	0	0	0	0	0	0	0	0	0	2	1	0	0
ENSG00000035664	8	172	0	90	34	46	61	4	20	247	18	79	9	29	7	5	26	165	99	323	52	176	44	18	17	19	61	30	111	28	4	24	63
ENSG00000035681	26	325	41	263	65	87	42	98	79	313	74	140	137	132	37	30	38	139	125	49	30	99	98	95	142	78	404	113	24	35	88	376	73
ENSG00000035687	32	528	59	416	77	109	243	295	315	177	116	209	215	376	164	21	29	454	385	1521	121	265	81	109	60	187	77	109	295	110	173	49	5
ENSG00000035720	10	0	0	40	0	1	13	0	1	72	1	0	12	0	10	0	0	12	12	0	1	2	21	9	5	0	0	0	1	1	0	3	0
ENSG00000035862	74	742	91	272	248	207	110	227	367	275	39	106	101	396	67	48	41	438	266	554	221	232	116	120	56	109	280	142	269	100	257	441	40
ENSG00000035928	27	1037	43	167	90	54	89	161	122	134	68	57	160	111	117	0	26	220	265	928	151	42	137	80	45	117	50	56	201	57	19	49	4
ENSG00000036054	23	167	20	121	56	40	66	46	133	157	47	48	56	67	54	1	3	71	112	187	27	55	47	30	29	79	51	35	105	42	2	29	22
ENSG00000036257	67	572	24	263	179	107	147	237	175	365	128	132	150	147	112	3	1	270	388	280	103	86	37	70	48	158	172	122	295	82	64	104	8
ENSG00000036448	0	0	0	1	1	0	8	0	14	1	3	0	7	0	5	0	1	35	37	337	21	2	4	10	4	32	3	3	16	21	3	5	0
ENSG00000036530	0	0	0	2	0	0	1	0	0	42	0	0	0	0	3	0	0	0	0	0	27	0	0	0	0	8	0	0	1	0	0	1	13
ENSG00000036549	21	85	3	50	55	31	64	70	115	96	60	144	42	71	71	14	18	129	69	921	4	84	44	23	28	38	20	19	44	53	4	32	2
ENSG00000036672	0	0	3	41	4	6	52	53	0	23	0	84	1	0	9	0	2	8	62	256	25	0	0	3	0	25	0	8	1	5	1	1	0
ENSG00000037042	0	0	8	17	0	0	10	16	3	0	3	1	0	0	4	0	0	40	39	0	0	0	0	0	1	0	0	0	0	0	1	0	0
ENSG00000037241	0	130	0	82	31	18	63	114	64	105	71	13	92	198	49	0	0	62	128	131	3	30	19	11	19	42	8	33	75	20	3	9	13
ENSG00000037474	34	563	7	87	52	109	232	124	223	242	80	46	99	56	98	2	32	345	154	776	92	127	81	66	44	111	38	29	193	118	69	22	4
ENSG00000037637	21	90	0	47	42	27	35	17	44	17	5	2	77	119	43	6	2	51	82	565	11	18	11	13	18	42	9	3	72	16	1	3	3
ENSG00000037749	1	111	0	18	6	10	6	26	54	0	4	55	0	0	13	0	1	6	54	2	13	1	28	10	8	21	15	11	65	12	0	0	1
ENSG00000037757	36	59	1	64	48	37	48	8	91	122	21	66	49	22	30	11	0	98	84	2	15	36	76	13	29	45	24	4	45	35	7	20	2
ENSG00000037897	0	159	0	11	18	9	2	23	33	73	7	1	1	0	11	0	0	31	39	384	0	0	39	12	2	13	3	46	21	18	3	19	1
ENSG00000038002	27	340	11	108	48	48	60	90	161	111	115	87	301	204	128	1	22	194	233	245	121	36	60	49	29	132	22	45	136	61	52	37	7
ENSG00000038210	35	308	8	38	42	14	73	28	50	59	36	127	6	11	28	0	0	24	170	42	2	33	14	5	25	50	11	19	53	9	92	17	38
ENSG00000038219	111	1299	329	1282	531	403	352	262	572	316	439	550	303	348	233	96	63	430	433	340	281	612	209	255	163	132	764	695	454	279	121	546	106
ENSG00000038274	31	565	6	119	56	72	117	166	109	84	81	22	110	85	91	21	36	98	151	98	109	54	84	55	63	123	76	62	111	63	66	57	7
ENSG00000038295	7	1	12	0	2	4	1	69	14	148	0	0	0	0	22	0	0	5	6	0	19	0	1	1	3	0	1	8	29	16	0	8	31
ENSG00000038358	0	0	0	0	0	0	0	0	14	0	1	0	0	0	0	0	18	0	0	0	0	0	0	6	0	0	0	0	17	0	0	0	0
ENSG00000038382	45	383	8	50	29	89	34	94	198	13	62	5	86	76	48	15	36	166	163	112	70	110	98	35	40	62	35	54	143	58	62	50	50
ENSG00000038427	1	117	98	99	6	45	1	9	62	125	16	3	0	0	24	3	1	77	1	5	28	11	0	20	4	8	25	60	7	18	4	140	70
ENSG00000038532	1	53	0	24	23	40	30	32	33	17	20	50	20	1	41	1	2	56	48	258	31	11	18	5	13	7	6	15	42	30	3	10	0
ENSG00000038945	30	6	0	0	11	1	10	0	61	0	36	1	37	75	30	1	16	50	2	0	4	54	0	29	37	7	0	12	25	53	0	125	0
ENSG00000039068	333	4438	34	1064	661	462	1216	828	1112	2286	419	705	847	842	660	79	171	1426	1422	3177	763	642	684	311	327	500	205	263	1771	488	241	186	102
ENSG00000039123	37	738	66	541	149	88	178	211	299	129	188	160	160	90	161	1	41	191	219	1275	198	97	131	106	80	164	26	93	246	158	64	62	35
ENSG00000039139	1	108	23	1241	21	45	324	734	134	480	13	38	1	2	119	3	31	170	681	875	113	33	52	35	18	52	8	113	57	138	8	17	5
ENSG00000039319	9	528	56	329	97	80	135	135	123	62	103	113	73	77	58	10	103	172	94	1	110	169	39	87	125	91	362	105	154	83	12	245	49
ENSG00000039523	69	0	9	34	27	17	21	5	47	211	27	0	18	32	16	0	16	26	71	0	1	23	36	11	14	8	48	4	67	10	0	16	1
ENSG00000039560	111	1687	147	247	247	178	399	230	676	801	291	225	660	368	457	47	46	553	539	827	245	130	330	187	149	625	112	86	438	222	203	29	15
ENSG00000039650	0	109	7	22	36	37	16	32	92	6	11	3	39	0	21	20	2	60	21	311	47	13	2	7	5	1	12	29	21	3	0	1	9
ENSG00000040199	0	66	0	16	2	1	0	19	9	0	16	0	0	0	25	0	0	23	14	0	39	20	0	6	4	11	0	4	0	0	0	0	0
ENSG00000040275	46	318	22	35	44	40	32	20	49	45	68	16	32	146	14	1	33	43	34	2	38	5	6	37	4	62	4	30	43	56	1	1	4
ENSG00000040341	25	517	27	281	98	91	201	199	270	129	81	76	191	161	113	7	30	271	223	746	197	131	153	90	91	204	79	90	363	143	29	85	34
ENSG00000040487	0	166	14	8	6	16	1	24	55	1	19	14	29	0	6	0	0	11	96	0	6	1	19	11	5	0	8	16	42	8	0	4	0
ENSG00000040531	7	172	2	52	25	23	72	58	84	2	3	56	41	60	18	0	1	35	64	677	38	34	31	14	6	33	3	2	3	26	41	31	2
ENSG00000040608	0	1	2	0	0	2	13	0	0	0	1	0	0	0	1	0	0	6	0	1	25	0	0	2	8	0	0	0	0	0	0	0	0
ENSG00000040633	22	545	42	37	41	48	43	69	50	11	44	19	102	92	52	5	0	53	52	101	97	118	65	20	57	55	182	59	99	62	102	49	15
ENSG00000040933	9	0	0	27	8	23	7	2	35	0	7	10	24	36	5	17	11	17	7	9	8	31	5	3	6	2	13	0	20	12	52	0	1
ENSG00000041353	39	736	60	136	136	40	209	100	150	48	122	65	244	326	75	1	2	209	240	192	114	88	106	70	43	140	49	20	543	118	104	14	4
ENSG00000041357	163	861	50	343	246	109	202	237	514	385	315	192	395	218	119	3	53	375	258	905	190	204	107	159	157	116	204	157	240	192	110	87	61
ENSG00000041515	0	0	0	0	0	0	0	0	0	0	10	0	0	0	0	0	0	8	0	0	0	0	0	0	0	0	0	0	0	0	0	0	0
ENSG00000041802	40	138	54	460	111	63	111	149	205	252	127	64	140	159	88	13	20	168	180	825	91	51	110	65	55	58	57	23	171	159	6	43	14
ENSG00000041880	42	312	20	81	34	27	85	148	93	386	57	11	40	0	89	0	9	152	39	2	99	8	41	29	13	69	6	30	35	61	3	13	3
ENSG00000041982	44	27	3	19	15	107	8	27	275	44	49	12	2	18	55	22	8	825	1	0	33	38	141	12	2	176	8	29	110	15	19	2	5
ENSG00000041988	2	58	0	82	16	12	36	39	23	1	15	2	29	1	13	0	1	42	29	35	14	47	50	5	18	17	25	4	71	8	6	6	1
ENSG00000042062	10	188	0	39	8	17	41	0	15	67	10	1	20	119	9	0	0	64	0	1	6	0	21	7	16	11	8	5	82	23	0	5	18
ENSG00000042088	5	51	11	107	16	17	48	32	23	198	13	0	12	10	57	0	7	37	160	365	21	21	16	1	23	26	18	6	25	30	55	2	0
ENSG00000042286	0	96	0	48	4	7	51	34	20	2	42	0	11	42	16	1	19	9	14	80	12	1	15	15	14	12	2	6	42	2	3	6	8
ENSG00000042317	0	0	0	38	8	13	15	35	1	0	13	0	6	1	6	0	0	14	30	0	0	0	1	0	0	13	19	13	8	27	0	1	1
ENSG00000042429	0	202	1	25	24	33	40	9	42	0	17	35	21	43	35	10	0	33	31	147	12	10	0	0	3	26	27	38	60	7	2	13	12
ENSG00000042445	97	1470	14	225	236	187	416	230	345	533	255	192	332	333	176	8	61	599	538	258	273	160	200	111	36	245	105	41	358	188	210	52	7
ENSG00000042493	30	257	62	55	75	66	127	136	480	8	200	48	136	124	69	12	5	242	139	119	111	54	93	46	62	62	81	180	167	88	54	286	25
ENSG00000042753	64	509	10	144	69	64	137	123	187	35	104	121	53	87	62	23	19	196	122	248	65	123	30	65	52	90	48	60	147	104	3	67	3
ENSG00000042781	0	0	0	0	1	0	0	11	11	0	0	0	0	0	0	0	0	9	0	0	0	0	0	0	7	0	0	0	0	7	0	1	0
ENSG00000042832	0	0	0	0	1	0	0	0	7	0	5	0	0	0	0	0	0	0	0	0	18	15	0	0	0	7	3	0	5	0	0	2	0
ENSG00000042980	89	958	23	269	131	71	342	185	607	339	259	89	233	70	212	3	15	410	224	375	104	104	67	104	97	185	28	91	195	131	54	24	12
ENSG00000043039	32	11	0	39	8	24	5	23	7	26	21	0	11	28	23	11	0	7	33	0	23	10	78	10	0	11	11	10	14	18	1	0	36
ENSG00000043093	36	146	4	49	42	41	26	72	57	3	31	1	22	18	35	31	1	51	81	109	69	34	24	22	7	20	28	25	123	51	5	48	1
ENSG00000043143	51	399	4	132	20	64	35	112	28	149	26	13	74	20	74	1	4	61	88	285	47	48	31	20	22	56	11	39	77	21	65	32	1
ENSG00000043462	63	18	84	345	137	118	34	34	72	113	74	411	27	2	20	36	59	130	107	5	66	770	56	115	217	36	1196	261	5	78	336	990	255
ENSG00000043514	1	2	14	45	3	16	43	56	21	3	8	151	40	0	46	0	0	104	37	323	16	0	24	6	2	28	1	6	44	32	5	0	9
ENSG00000043591	0	260	2	143	41	31	69	129	22	101	8	98	23	122	47	0	0	98	84	235	25	8	0	20	23	46	5	23	96	67	47	20	4
ENSG00000044090	1	1	0	11	1	5	1	27	1	0	4	34	0	0	4	0	0	9	0	0	0	0	0	0	0	19	0	0	1	8	0	0	0
ENSG00000044115	354	2685	102	904	543	305	838	559	948	968	394	213	515	395	350	50	175	760	762	3072	632	813	543	162	202	264	219	256	1028	486	324	104	39
ENSG00000044446	1	83	0	87	30	27	20	0	45	0	5	0	4	47	13	0	3	65	10	277	27	10	13	15	8	50	19	11	17	23	1	3	1
ENSG00000044459	1	71	11	196	26	37	100	67	33	172	51	71	26	13	29	0	1	53	83	0	4	12	29	19	11	26	33	8	14	11	35	28	11
ENSG00000044574	413	6657	392	2345	1057	585	1609	1683	3371	2671	1328	667	1153	552	979	86	159	1588	1232	5576	749	1053	784	630	701	1269	903	861	1194	1060	610	666	197
ENSG00000046604	41	1028	20	319	190	212	204	280	428	271	215	6	254	351	104	3	31	268	112	1015	78	224	142	139	56	96	52	76	332	125	7	62	7
ENSG00000046647	0	200	0	13	8	8	33	53	59	112	6	0	30	37	19	0	0	40	68	1	11	1	0	9	10	13	11	23	14	20	0	1	0
ENSG00000046651	83	606	6	236	121	70	155	200	234	5	95	40	109	166	103	13	14	184	87	38	116	116	80	55	51	41	36	26	154	85	7	15	4
ENSG00000046653	5	0	2	7	8	1	11	35	19	1	6	0	0	0	7	0	1	33	17	96	33	9	0	10	0	13	6	16	20	8	1	0	2
ENSG00000047056	0	81	12	42	17	7	37	21	2	104	7	30	2	0	19	9	0	73	73	3	1	26	2	8	0	10	33	3	3	10	0	4	1
ENSG00000047188	32	246	14	118	124	50	116	111	172	206	35	226	102	35	97	8	11	182	144	622	105	60	88	60	43	73	60	43	156	38	3	19	6
ENSG00000047230	1	252	0	29	4	12	91	34	37	115	12	37	5	1	2	1	23	19	109	15	1	49	34	14	4	19	2	22	33	11	92	1	2
ENSG00000047249	1	103	1	117	59	23	70	54	187	222	24	5	99	179	52	0	17	194	106	564	102	101	95	24	47	65	49	30	78	25	8	29	0
ENSG00000047315	155	1720	13	436	193	98	271	332	511	743	200	388	341	224	214	30	55	378	585	596	228	209	298	126	119	234	145	121	340	154	111	66	11
ENSG00000047346	57	829	21	378	224	164	251	244	282	313	124	52	212	144	68	30	29	368	385	460	163	134	93	91	82	118	58	29	416	55	42	44	8
ENSG00000047365	98	569	49	325	150	132	272	111	145	333	164	218	230	67	69	23	2	218	133	285	155	148	98	119	103	84	91	58	147	87	51	49	8
ENSG00000047410	127	1187	107	907	296	190	341	342	443	386	315	373	231	287	297	43	60	624	306	1469	269	284	124	158	147	254	682	438	353	241	54	217	84
ENSG00000047457	351	7485	109	1456	530	661	1252	1304	2560	1464	528	1228	1359	496	696	40	213	1575	1793	3938	779	532	536	296	417	968	200	347	1747	445	265	103	69
ENSG00000047578	1	13	16	112	30	24	105	50	10	421	11	57	43	33	15	0	48	75	135	81	53	20	18	15	8	15	20	12	73	67	3	9	47
ENSG00000047579	0	546	20	82	29	30	53	38	36	134	22	0	110	98	44	0	3	78	75	3	87	61	56	15	64	55	74	36	60	22	22	48	1
ENSG00000047597	11	0	0	23	1	0	0	0	1	36	0	87	4	0	4	0	0	0	2	0	0	0	0	1	0	0	0	0	0	8	0	0	1
ENSG00000047621	57	94	11	116	44	21	85	77	45	69	82	25	100	15	54	5	0	144	104	191	6	22	17	23	16	28	67	43	35	18	4	4	1
ENSG00000047634	1	0	1	27	19	1	14	6	9	16	11	0	11	0	12	0	0	16	5	192	14	0	9	2	0	14	0	22	18	0	1	0	28
ENSG00000047644	6	270	24	173	64	39	81	108	131	3	30	41	45	49	61	27	0	117	146	529	50	127	37	21	27	33	113	36	91	27	20	147	84
ENSG00000047648	0	1	8	0	10	0	20	18	22	0	10	0	19	0	12	0	0	11	46	52	11	1	0	1	2	11	10	0	23	8	1	1	1
ENSG00000047849	3	302	27	251	87	78	113	148	281	161	155	79	97	47	54	2	37	230	272	1031	102	149	128	42	14	60	26	83	143	115	11	23	5
ENSG00000047932	27	254	33	165	47	53	150	117	122	80	33	104	88	52	90	11	13	155	134	434	88	77	162	38	55	40	22	65	76	72	44	12	3
ENSG00000048028	0	185	4	58	76	19	60	13	69	2	21	1	35	0	47	1	0	41	15	79	62	2	0	20	4	42	0	10	28	39	97	22	0
ENSG00000048052	12	364	0	28	19	34	73	87	91	138	34	89	72	72	41	0	18	71	54	369	79	31	21	47	53	4	29	5	32	23	2	23	5
ENSG00000048140	48	481	32	50	23	39	140	65	114	1	98	11	49	58	62	0	2	192	60	291	47	6	145	32	59	81	23	33	161	92	55	9	2
ENSG00000048162	22	138	9	15	32	15	35	38	96	22	53	2	55	84	29	2	10	40	36	341	39	33	7	8	7	38	27	44	58	26	32	36	0
ENSG00000048342	10	1	28	143	9	0	63	160	19	290	1	138	0	0	65	0	1	44	40	1022	6	1	43	28	0	20	4	9	4	36	3	4	4
ENSG00000048392	10	754	19	177	50	65	54	147	142	196	46	18	44	73	100	0	34	248	63	285	38	101	46	53	20	65	64	48	111	76	32	70	7
ENSG00000048405	37	211	18	122	28	25	62	61	148	87	107	44	32	19	67	1	2	79	145	4	13	3	4	16	17	22	29	60	70	61	12	23	2
ENSG00000048471	0	255	43	40	10	30	40	11	37	0	12	1	36	9	39	6	62	22	3	517	35	21	15	9	3	18	14	33	31	30	3	32	3
ENSG00000048544	36	709	20	252	114	102	192	172	268	4	136	102	74	85	45	2	5	165	334	491	52	110	60	104	62	83	21	65	198	98	6	44	6
ENSG00000048649	95	1114	160	465	192	197	338	301	297	209	245	464	258	235	183	45	71	498	297	911	268	219	118	150	134	210	194	227	334	162	198	145	46
ENSG00000048707	172	978	76	506	140	152	376	279	208	466	144	226	246	229	168	5	65	459	410	793	176	132	241	81	63	287	158	103	218	177	46	91	98
ENSG00000048740	104	326	99	347	72	180	117	61	163	104	122	199	78	14	69	57	29	147	163	80	99	427	67	101	65	31	488	204	54	65	277	499	175
ENSG00000048828	253	3592	40	1078	446	347	779	1008	1142	694	400	463	402	666	592	60	92	1029	934	1787	518	548	545	276	270	527	350	392	991	511	352	409	118
ENSG00000048991	0	76	0	57	38	5	33	55	73	2	28	2	35	0	6	0	0	58	23	1	33	0	12	13	17	5	5	23	32	24	1	9	12
ENSG00000049089	0	0	0	9	0	12	25	0	6	0	0	0	0	41	7	0	0	10	13	0	0	0	0	3	2	2	3	1	2	9	0	1	0
ENSG00000049130	1	82	1	53	79	10	78	35	63	85	35	3	52	149	14	6	1	91	74	302	2	0	53	20	26	14	6	3	20	8	1	1	2
ENSG00000049167	0	140	0	24	1	0	13	21	3	0	28	0	0	11	0	0	4	18	61	0	20	1	0	6	2	3	1	10	1	2	2	1	6
ENSG00000049192	0	0	0	0	0	2	0	0	1	0	5	2	0	0	0	0	1	10	0	0	1	0	0	0	0	0	0	0	0	10	0	1	26
ENSG00000049239	85	1442	59	303	204	158	233	196	411	292	97	171	156	190	198	38	28	319	774	357	149	124	217	140	116	272	49	71	557	135	124	80	35
ENSG00000049245	0	482	13	100	51	70	45	56	69	3	35	62	39	78	34	17	5	73	96	281	112	146	50	51	33	42	88	58	123	41	44	33	38
ENSG00000049246	20	346	2	244	114	23	65	90	109	85	36	143	52	174	79	0	15	134	131	2	77	28	46	16	8	82	12	56	39	39	128	35	3
ENSG00000049247	2	0	11	0	1	0	0	0	0	0	0	0	0	1	0	0	0	1	11	0	1	1	0	0	4	0	1	0	0	0	2	10	0
ENSG00000049249	0	1	0	0	7	6	0	0	0	0	2	3	1	0	0	8	0	3	0	0	0	34	0	1	6	0	29	3	0	1	0	46	1
ENSG00000049283	34	277	1	84	107	32	142	49	81	382	47	164	63	228	62	0	51	214	220	93	134	87	154	21	22	64	7	16	128	77	2	21	6
ENSG00000049323	3	41	2	48	18	22	57	35	42	0	0	0	20	3	22	17	27	56	64	3	7	11	1	16	1	9	2	32	49	10	3	15	4
ENSG00000049449	15	234	0	6	21	1	43	8	68	1	10	66	34	37	12	0	12	62	68	171	10	29	3	15	9	25	0	38	19	11	1	1	0
ENSG00000049540	0	0	0	0	0	0	0	0	0	0	0	0	0	0	0	0	0	6	0	0	0	0	0	0	0	1	0	6	0	0	0	3	0
ENSG00000049541	0	72	3	11	2	6	9	4	46	9	28	21	34	22	23	9	2	46	58	1	13	35	11	12	1	13	17	20	45	9	2	11	20
ENSG00000049618	47	962	8	410	130	76	147	150	82	193	63	186	207	158	79	2	70	256	134	320	84	53	150	80	40	84	35	115	253	98	61	48	55
ENSG00000049656	161	1246	13	474	212	196	414	301	559	588	221	57	299	329	238	17	82	587	593	1585	267	240	356	146	123	300	83	71	465	168	245	140	13
ENSG00000049759	4	712	27	478	144	130	254	220	266	297	93	293	154	312	90	19	51	320	370	995	183	115	163	106	76	154	35	82	290	156	15	75	53
ENSG00000049769	0	1	0	19	0	0	17	1	5	58	0	0	17	0	1	0	11	5	7	1	46	8	52	0	0	1	1	20	1	24	1	0	0
ENSG00000049860	178	1560	28	132	130	150	314	165	302	866	160	203	252	149	251	6	35	696	342	944	101	193	154	102	93	231	51	78	356	116	304	106	3
ENSG00000049883	0	0	0	23	3	0	0	6	10	0	2	0	0	0	6	1	0	26	27	0	0	0	0	9	0	0	0	4	25	18	0	0	0
ENSG00000050030	0	51	0	79	14	3	10	1	0	64	5	0	1	0	5	0	0	0	85	194	1	0	1	15	2	16	0	5	0	11	0	0	0
ENSG00000050130	23	307	1	92	65	18	139	91	91	192	44	129	58	115	69	0	8	238	213	422	51	29	118	35	17	71	31	32	111	23	2	49	21
ENSG00000050165	0	0	10	0	0	0	0	0	11	0	0	0	4	0	24	0	0	3	0	0	1	0	0	0	0	0	0	0	0	0	0	0	0
ENSG00000050327	28	377	25	70	49	46	76	96	142	161	29	14	40	50	56	0	18	141	100	59	68	107	19	23	42	64	27	39	168	63	52	21	5
ENSG00000050344	8	105	13	65	40	27	19	24	108	0	74	1	69	121	31	0	4	28	23	170	57	1	15	12	16	66	6	4	17	16	31	14	0
ENSG00000050393	8	200	30	174	29	12	24	28	32	107	55	129	103	246	38	0	1	127	107	56	42	164	20	15	29	25	6	12	62	57	1	16	31
ENSG00000050405	314	3420	24	704	555	406	813	716	1160	536	342	496	917	686	595	16	138	1104	1188	1268	426	228	383	270	258	825	139	219	1039	356	185	90	17
ENSG00000050426	0	0	14	28	21	17	60	0	15	1	16	80	45	0	11	0	1	36	24	3	24	12	15	6	5	42	0	6	44	56	1	19	2
ENSG00000050438	0	1	22	131	3	1	49	74	54	0	8	40	1	1	18	8	0	17	26	111	16	0	0	7	1	39	0	8	0	26	1	0	37
ENSG00000050628	0	0	0	0	0	3	0	10	24	0	0	0	0	0	4	0	0	8	0	0	25	0	5	0	0	1	0	0	2	0	16	0	0
ENSG00000050730	34	330	7	76	1	9	9	35	23	4	94	74	35	0	1	8	23	12	0	0	16	23	3	0	73	1	87	2	18	11	21	13	1
ENSG00000050748	0	267	0	75	29	9	70	44	31	74	26	59	48	26	28	0	7	61	52	2	25	1	32	15	16	21	33	15	70	46	3	8	0
ENSG00000050820	19	189	8	107	45	67	139	69	158	319	60	7	113	163	48	0	4	164	299	457	127	126	146	50	31	100	29	53	156	79	45	28	5
ENSG00000051009	8	273	20	114	79	38	87	74	37	97	31	141	15	29	60	1	25	147	152	770	41	37	108	20	20	50	41	41	57	28	45	69	9
ENSG00000051108	81	785	21	297	115	88	206	224	224	267	150	233	111	130	204	3	58	220	408	1476	163	246	215	91	71	173	176	62	145	99	29	159	23
ENSG00000051128	3	799	14	174	72	152	200	135	387	187	158	7	173	283	127	2	52	296	80	77	122	116	245	88	44	313	57	55	280	97	63	28	9
ENSG00000051180	0	0	0	16	0	0	12	0	0	0	7	0	0	0	0	0	0	20	0	0	1	0	0	3	2	8	0	0	2	0	0	13	0
ENSG00000051341	1	0	2	57	16	6	17	37	33	0	9	48	0	14	6	0	0	25	20	1	7	0	0	3	0	17	0	7	0	12	0	0	0
ENSG00000051382	16	199	15	47	33	20	52	79	54	179	49	119	16	52	34	0	59	54	25	272	39	64	51	40	17	46	11	8	38	12	17	11	3
ENSG00000051523	7	665	78	57	61	54	104	120	76	212	60	75	50	28	42	22	1	73	134	68	33	249	20	50	72	78	134	44	62	99	2	145	36
ENSG00000051596	0	174	0	33	39	3	34	9	30	62	21	1	18	7	14	0	0	66	48	101	16	1	47	12	18	30	0	13	51	16	1	5	0
ENSG00000051620	264	3037	144	997	666	325	646	791	834	347	832	460	856	739	392	35	144	754	508	1318	491	427	308	317	300	596	569	458	806	393	186	177	48
ENSG00000051825	0	2	0	29	14	10	11	34	6	60	20	1	34	0	19	0	1	11	0	71	17	0	1	1	12	1	15	3	27	3	0	0	1
ENSG00000052126	53	465	50	319	181	81	209	131	229	158	103	349	147	61	115	15	2	324	187	631	95	113	138	53	35	177	25	37	313	81	8	32	30
ENSG00000052344	56	636	36	275	198	111	153	36	110	91	130	93	255	221	57	35	77	157	148	93	180	243	155	77	55	44	111	101	276	85	95	61	29
ENSG00000052723	5	1	23	41	39	26	55	9	72	1	32	89	90	1	17	6	7	36	20	68	16	61	28	24	27	35	9	14	59	31	2	14	34
ENSG00000052749	10	80	1	58	22	23	70	20	3	24	31	4	12	0	39	20	1	52	38	274	28	0	11	18	3	31	57	8	0	26	20	128	5
ENSG00000052795	85	678	34	86	56	60	162	78	173	45	32	282	27	159	75	3	33	214	345	9	67	90	115	56	45	50	42	41	140	43	4	103	35
ENSG00000052802	5	456	11	103	27	20	201	161	78	258	29	197	84	23	67	1	1	70	101	1073	57	17	37	20	27	76	20	19	101	57	8	10	5
ENSG00000052841	60	495	28	196	110	136	166	161	266	309	101	127	165	36	125	6	3	235	208	292	145	28	109	39	47	48	62	89	250	113	55	36	22
ENSG00000053108	0	0	0	0	1	0	2	0	0	0	0	0	0	1	3	0	0	2	6	0	0	0	1	0	0	11	0	0	0	0	0	0	0
ENSG00000053254	186	1744	33	515	239	170	463	289	307	336	113	405	253	146	182	63	39	531	536	1239	292	464	245	114	54	253	244	125	305	158	131	247	122
ENSG00000053371	26	56	15	186	24	33	105	101	70	30	104	0	56	38	74	0	49	115	212	794	89	30	66	45	36	67	12	101	91	56	12	15	21
ENSG00000053372	17	416	16	125	13	48	15	30	69	38	114	89	91	0	48	1	12	151	65	296	25	110	68	51	41	40	5	54	84	66	152	1	1
ENSG00000053501	1	109	7	50	7	5	0	5	30	0	11	0	10	0	1	1	0	0	70	97	1	13	18	4	3	3	7	20	11	12	1	1	43
ENSG00000053524	0	0	0	6	4	0	2	3	15	0	1	0	0	0	0	0	0	0	0	192	0	0	12	3	0	0	0	0	0	9	0	2	0
ENSG00000053747	0	3	20	15	6	18	8	14	103	1	41	0	1	0	9	1	1	50	0	0	2	14	0	6	0	0	0	35	1	0	0	10	0
ENSG00000053770	1	331	2	50	59	36	49	50	136	14	50	82	44	38	30	3	6	78	48	86	51	51	3	18	9	67	23	42	42	15	3	16	5
ENSG00000053900	0	144	13	116	14	36	37	33	72	102	30	29	63	65	23	1	8	170	67	46	19	3	2	13	18	13	19	10	24	54	142	12	1
ENSG00000053918	19	671	19	67	33	40	90	83	196	250	18	50	122	166	76	1	50	225	228	259	137	96	145	34	17	104	79	28	31	58	46	175	39
ENSG00000054116	88	758	31	225	50	76	97	142	207	118	105	141	192	136	88	3	4	261	251	705	161	79	92	57	47	75	75	84	266	30	134	86	18
ENSG00000054118	46	829	96	474	176	144	328	296	369	364	140	245	127	339	233	28	28	293	133	147	130	273	123	119	90	93	198	79	189	181	190	151	95
ENSG00000054148	1	104	14	51	16	17	39	35	2	187	20	0	24	92	35	0	14	77	117	0	83	1	2	14	14	41	0	37	3	13	0	1	0
ENSG00000054179	1	77	4	15	5	0	4	0	30	0	2	0	0	0	3	0	0	19	13	0	31	0	43	1	0	8	0	0	9	2	1	3	0
ENSG00000054219	6	115	0	94	24	23	42	12	79	84	4	0	17	0	14	1	0	66	91	1	40	13	1	7	9	22	14	16	22	9	58	14	0
ENSG00000054267	88	1317	134	1148	398	251	393	532	441	473	317	452	181	327	170	78	51	539	540	1298	244	582	184	151	259	278	934	394	342	302	239	457	254
ENSG00000054277	24	112	22	75	47	6	2	89	41	0	27	1	26	11	13	0	1	92	17	251	22	18	1	22	22	5	27	6	48	38	0	3	0
ENSG00000054282	1	545	5	168	81	56	90	105	165	59	34	73	62	159	128	8	23	118	151	703	101	82	65	50	49	120	77	78	86	73	33	60	15
ENSG00000054392	1	2	6	98	3	5	18	45	6	93	23	3	11	0	9	0	1	47	54	323	33	0	15	12	4	12	0	5	11	22	2	1	7
ENSG00000054523	34	538	18	213	26	38	81	30	131	311	64	0	77	1	63	17	0	110	76	132	70	118	53	59	49	57	168	84	73	88	139	56	44
ENSG00000054598	114	2278	23	369	332	247	489	541	384	461	149	164	720	575	471	0	155	544	508	553	352	193	244	89	134	253	121	100	807	252	209	127	21
ENSG00000054611	15	188	34	134	69	89	117	120	98	112	109	88	50	1	48	33	29	112	195	369	103	93	58	52	24	45	109	43	186	54	33	17	15
ENSG00000054654	249	2309	208	1981	627	631	586	897	849	646	460	475	500	486	499	41	98	1081	826	1570	428	701	469	223	232	564	409	540	819	530	58	393	171
ENSG00000054690	46	77	0	139	51	38	67	43	80	2	35	1	23	77	27	0	35	73	72	2	25	4	8	1	13	38	2	8	52	15	0	11	3
ENSG00000054793	109	745	29	245	76	36	147	148	129	322	76	182	137	67	107	7	19	373	370	178	154	106	136	56	18	77	16	37	178	147	60	22	2
ENSG00000054965	12	197	0	77	23	5	17	29	35	52	9	105	37	24	23	0	2	67	2	112	30	1	70	20	6	3	23	38	32	13	3	4	4
ENSG00000054967	0	50	15	29	19	33	6	19	3	3	23	1	16	0	8	35	0	49	2	0	45	138	2	32	21	10	106	25	1	16	61	139	85
ENSG00000054983	55	419	19	143	51	32	171	226	168	404	36	140	88	147	72	1	22	234	339	137	106	41	119	58	59	73	171	63	191	125	4	222	7
ENSG00000055044	44	629	40	152	59	35	174	208	125	45	136	170	66	0	118	13	4	190	87	597	85	63	58	56	37	147	24	63	155	98	8	110	5
ENSG00000055070	50	278	17	182	87	71	135	100	203	102	114	42	77	166	120	1	3	244	161	358	116	119	134	60	79	83	83	50	193	75	84	83	30
ENSG00000055130	9	446	20	129	38	19	102	132	113	65	80	29	42	24	95	1	0	123	226	3	50	42	21	34	16	79	42	65	66	58	4	10	23
ENSG00000055147	0	101	21	82	16	14	33	0	17	5	6	1	7	43	23	8	33	72	37	1	9	0	21	6	6	25	1	6	2	6	0	20	1
ENSG00000055163	12	58	17	35	8	40	104	6	46	12	7	63	34	0	50	3	19	143	23	85	54	101	96	47	22	24	47	0	18	33	87	70	20
ENSG00000055208	86	1112	38	260	120	104	180	164	294	308	70	138	154	255	118	12	24	197	206	300	118	212	116	71	59	80	262	102	324	72	34	211	82
ENSG00000055211	18	683	42	166	155	61	115	148	178	83	137	46	181	211	112	0	67	198	157	475	143	50	122	61	84	115	113	91	302	83	56	42	2
ENSG00000055332	64	1040	42	334	149	159	201	366	249	404	81	304	278	177	170	25	40	348	464	1136	200	88	257	83	69	100	168	94	256	97	112	35	97
ENSG00000055483	26	320	25	189	61	82	104	92	202	112	69	175	40	211	47	24	37	254	162	221	163	44	64	70	47	83	35	53	179	119	10	131	82
ENSG00000055609	73	1427	98	805	378	191	329	420	322	439	311	458	219	385	258	46	90	412	620	932	172	546	193	153	152	220	368	358	463	197	135	209	104
ENSG00000055732	0	0	1	40	1	13	0	0	1	1	19	0	4	0	0	8	0	15	0	0	20	8	0	3	0	10	0	7	8	0	1	21	0
ENSG00000055917	67	1092	19	386	133	55	185	282	327	247	97	10	167	238	107	15	41	285	265	487	87	157	62	99	70	185	174	111	227	167	10	63	3
ENSG00000055950	95	457	12	93	117	96	229	131	276	162	60	261	200	140	116	1	3	236	128	1326	99	21	63	55	36	96	28	106	241	127	52	25	4
ENSG00000055955	0	0	0	1	0	0	0	0	0	21	0	0	0	0	0	0	0	0	0	0	0	0	0	0	0	0	0	14	0	0	0	0	13
ENSG00000056050	1	169	3	50	19	26	86	25	26	0	32	2	83	60	29	0	1	100	153	108	4	9	13	16	42	61	5	6	73	36	2	31	2
ENSG00000056097	31	488	18	285	101	112	147	208	241	97	163	16	163	187	91	5	3	192	170	388	63	60	56	77	61	91	57	97	245	132	94	41	0
ENSG00000056277	0	0	1	6	1	8	9	7	8	0	1	0	0	0	0	0	0	2	0	1	19	46	0	3	3	0	0	0	0	0	1	0	0
ENSG00000056558	0	0	0	0	16	11	0	0	0	0	7	1	0	0	0	0	1	0	16	50	9	56	0	5	9	1	19	7	10	14	0	31	42
ENSG00000056586	69	747	36	209	70	56	239	114	61	128	100	75	72	76	124	20	28	292	248	214	115	89	23	39	52	71	50	90	190	46	7	70	4
ENSG00000056972	10	685	33	87	38	23	27	19	120	162	35	76	54	1	15	31	2	108	84	159	55	14	40	23	9	15	48	49	116	16	1	9	25
ENSG00000056998	1	0	7	0	13	5	0	16	8	1	1	1	19	41	6	0	0	44	9	0	19	0	23	3	2	4	0	0	1	0	0	1	2
ENSG00000057019	25	93	0	98	13	26	61	86	79	291	42	46	74	71	86	0	22	83	16	155	7	17	33	27	30	66	4	35	126	59	6	8	1
ENSG00000057149	422	10305	366	1195	1782	620	3765	680	1893	1675	4527	902	3486	1386	1758	157	77	1972	1801	2630	963	1583	1130	472	789	3660	712	790	1299	1324	1532	203	183
ENSG00000057252	42	134	35	176	28	40	159	149	90	47	45	2	63	62	55	3	1	97	98	21	27	23	16	34	34	87	37	31	54	67	53	21	0
ENSG00000057294	25	345	0	90	28	16	63	59	108	33	35	31	40	17	65	1	10	93	55	166	32	93	68	20	8	60	3	25	51	48	48	7	1
ENSG00000057608	43	1440	73	270	218	146	372	197	351	276	232	140	256	293	133	8	53	349	364	866	188	220	76	90	115	254	131	197	234	153	133	199	48
ENSG00000057657	28	524	83	60	94	50	24	71	75	128	41	39	102	159	36	49	22	55	88	573	148	172	43	27	35	43	143	60	190	68	98	50	16
ENSG00000057663	5	157	16	103	54	49	57	46	87	114	55	2	69	23	72	0	1	104	40	309	60	22	6	43	12	75	34	54	79	35	3	18	1
ENSG00000057704	67	94	11	138	70	102	9	40	53	2	94	3	26	102	24	37	24	129	4	62	41	385	35	44	47	30	264	93	61	41	164	308	44
ENSG00000057757	6	119	1	58	46	46	104	87	48	59	29	4	98	97	30	0	27	111	102	253	47	34	143	44	30	91	24	40	59	55	2	63	3
ENSG00000057935	2	187	8	236	104	32	104	113	122	191	100	40	162	88	65	1	28	351	224	503	169	37	121	39	23	96	25	36	166	60	7	19	6
ENSG00000058056	29	0	0	51	5	13	64	12	28	49	1	16	31	0	11	1	1	13	0	0	10	1	43	0	8	2	2	1	2	1	1	5	0
ENSG00000058063	25	343	22	159	73	26	41	81	41	130	83	6	83	35	80	13	27	120	55	332	45	128	70	43	26	59	166	57	105	55	18	75	29
ENSG00000058085	1	105	41	267	39	209	103	106	752	42	147	27	30	26	105	15	1	389	62	337	90	90	143	65	12	37	30	262	170	70	4	32	25
ENSG00000058091	2	219	0	66	11	6	32	2	83	0	0	0	0	0	15	0	0	16	0	1	24	23	1	1	4	15	27	10	28	11	0	5	4
ENSG00000058262	35	1371	30	259	204	164	310	244	686	488	194	200	220	139	145	36	64	727	640	2139	444	325	231	119	106	208	116	159	293	313	272	221	60
ENSG00000058272	29	596	61	313	262	148	175	227	333	217	220	292	173	307	115	66	37	160	181	773	121	241	11	120	90	147	448	238	163	180	190	321	138
ENSG00000058404	0	0	0	0	0	0	0	0	0	0	7	0	0	0	0	0	0	14	0	0	0	0	0	0	0	0	0	0	0	0	0	0	0
ENSG00000058453	25	5	2	326	13	27	41	180	70	146	1	1	0	15	58	2	20	88	155	173	68	2	98	21	16	71	0	0	23	31	2	8	2
ENSG00000058600	29	306	2	46	61	39	56	72	58	12	34	60	60	27	13	14	30	100	137	0	23	13	44	7	16	42	4	0	34	30	0	4	6
ENSG00000058668	97	371	43	376	100	119	315	150	177	253	209	266	126	93	162	15	3	298	176	262	80	12	71	45	55	78	118	150	159	91	11	129	5
ENSG00000058673	63	662	20	374	116	90	217	283	347	236	179	107	128	366	149	38	11	209	323	949	157	268	224	81	63	104	160	203	217	98	131	103	56
ENSG00000058729	19	142	37	27	8	8	72	72	15	64	21	6	47	6	38	0	0	19	62	0	14	25	1	21	14	9	2	20	18	35	2	1	2
ENSG00000058799	11	798	40	58	133	46	130	130	205	66	56	211	84	231	65	8	50	161	87	8	27	78	60	70	46	96	56	77	142	97	50	121	3
ENSG00000058804	23	261	4	36	39	37	64	29	106	0	49	31	80	63	35	1	2	91	35	274	78	41	29	12	18	129	2	2	32	16	2	5	2
ENSG00000058866	0	1	0	18	0	0	1	0	0	0	3	0	0	0	0	1	13	0	2	0	6	0	20	0	0	1	3	0	1	10	0	4	0
ENSG00000059122	0	1	10	25	24	14	11	5	8	116	29	0	12	0	20	0	0	23	50	0	22	30	17	10	1	16	4	0	38	25	0	25	0
ENSG00000059145	0	271	1	52	34	38	45	51	26	6	29	3	74	38	11	0	8	40	45	128	32	25	35	12	12	20	16	20	49	27	1	13	2
ENSG00000059377	3	109	42	81	15	25	10	25	36	3	33	138	26	1	6	47	1	44	53	0	35	226	23	64	44	4	288	53	2	41	103	430	75
ENSG00000059378	1	180	0	59	18	37	90	58	103	71	22	3	35	1	35	1	26	103	149	222	77	29	69	20	37	84	22	14	106	45	3	26	2
ENSG00000059573	0	38	3	73	28	9	57	49	66	86	12	0	62	0	32	0	0	77	131	1	11	6	38	16	8	42	3	7	20	10	2	0	0
ENSG00000059588	13	137	1	90	14	13	52	30	72	85	49	1	39	45	16	0	13	57	55	0	12	10	12	12	13	15	3	10	61	26	0	3	0
ENSG00000059691	0	183	5	55	8	15	38	0	42	0	0	0	17	53	14	0	0	39	0	1	27	0	0	8	7	13	0	56	44	0	1	18	1
ENSG00000059728	318	3071	466	1725	604	652	260	281	431	252	349	1066	608	587	112	422	222	431	616	726	611	2015	290	424	793	249	2571	722	533	618	1307	2322	1250
ENSG00000059758	8	79	0	52	24	30	66	119	51	200	12	60	105	36	34	0	10	78	97	0	45	2	21	10	15	64	57	15	45	37	1	27	1
ENSG00000059769	0	332	6	41	63	21	40	38	64	1	28	1	56	188	50	6	1	30	46	500	37	0	44	13	19	60	35	26	63	30	2	38	0
ENSG00000059804	279	641	620	2435	342	539	40	104	271	455	478	2266	64	41	50	566	157	342	226	196	401	2771	52	445	725	147	5235	1967	148	714	1464	3897	1300
ENSG00000059915	0	23	0	0	0	0	10	5	0	36	0	0	1	0	0	0	0	0	0	0	0	26	0	7	4	0	0	0	0	0	0	0	0
ENSG00000060069	1	340	16	192	67	69	70	99	76	130	37	33	67	148	71	31	83	99	149	290	88	17	178	31	54	67	240	25	107	71	124	40	46
ENSG00000060138	119	1543	109	637	431	286	645	495	1050	753	650	600	588	418	381	54	104	1228	625	2287	502	762	280	198	245	647	344	214	535	433	509	409	93
ENSG00000060140	0	49	0	22	22	9	24	1	69	0	27	0	43	64	36	1	2	7	71	0	27	0	32	8	11	20	19	1	46	0	1	0	1
ENSG00000060237	134	1399	87	751	288	221	321	410	574	510	181	319	240	305	155	19	67	547	418	980	143	250	146	178	75	284	186	218	380	265	134	318	87
ENSG00000060339	51	1471	93	432	266	189	387	425	395	553	374	393	396	161	195	1	59	725	418	1184	258	188	244	129	121	299	93	184	600	183	144	70	19
ENSG00000060491	41	473	48	256	74	131	142	132	144	158	91	100	99	77	82	14	43	196	285	286	293	197	136	42	59	96	173	85	254	121	157	196	142
ENSG00000060558	26	836	51	162	72	134	170	241	293	50	166	123	178	168	126	32	74	86	114	573	172	215	148	74	87	133	124	47	246	94	133	191	79
ENSG00000060642	0	72	0	48	14	2	16	13	18	65	3	11	1	45	14	0	0	22	101	2	21	5	6	13	1	2	6	25	31	17	1	0	1
ENSG00000060656	81	724	18	392	144	172	214	142	258	267	135	116	121	264	140	13	63	450	439	630	294	173	224	99	50	138	45	146	238	151	114	69	7
ENSG00000060688	15	109	0	29	10	16	53	19	72	44	13	0	51	1	37	1	0	4	10	4	4	11	18	25	10	34	15	7	36	9	4	26	0
ENSG00000060718	0	0	0	0	0	0	0	0	0	0	0	0	0	0	0	0	6	0	0	0	0	0	0	0	1	1	0	0	0	10	0	0	0
ENSG00000060749	30	745	2	189	67	36	89	75	147	23	39	14	61	35	86	0	1	104	147	102	59	59	58	31	14	15	23	3	142	19	3	12	4
ENSG00000060762	22	305	8	219	54	56	186	154	100	5	98	43	181	44	73	0	30	118	79	215	108	31	69	67	55	81	48	20	215	67	52	17	4
ENSG00000060971	14	419	19	92	82	54	126	83	55	110	34	104	38	59	30	14	0	164	216	466	85	123	79	49	30	101	44	54	132	74	165	74	28
ENSG00000060982	45	3138	103	196	229	194	416	168	469	48	172	285	451	560	36	44	113	353	465	49	781	96	194	103	140	128	213	169	319	246	9	75	32
ENSG00000061273	176	1634	45	741	447	324	451	236	472	294	310	239	311	467	233	107	165	680	387	223	259	243	326	143	149	206	216	120	853	234	180	278	125
ENSG00000061337	0	60	0	0	0	0	0	0	0	0	0	35	25	0	5	0	0	5	0	0	1	1	21	1	0	0	0	0	0	8	0	4	1
ENSG00000061455	0	1	0	6	0	0	0	0	0	2	0	0	0	0	0	0	0	1	35	0	0	0	0	1	0	1	0	0	2	0	0	0	0
ENSG00000061656	0	0	0	10	2	3	11	0	0	0	0	0	0	0	0	0	0	6	0	0	1	0	0	0	0	0	4	0	0	0	0	1	0
ENSG00000061676	118	848	48	258	108	89	183	160	279	421	151	8	172	263	132	0	17	287	302	1375	132	164	156	19	60	92	42	92	266	88	136	32	12
ENSG00000061794	9	409	6	94	74	31	170	90	107	147	82	56	164	46	74	1	0	144	129	720	25	30	66	47	22	55	7	36	46	48	102	8	2
ENSG00000061918	0	0	0	3	0	6	17	0	18	0	11	0	0	2	0	0	0	0	10	0	0	0	7	10	0	12	0	0	0	16	0	2	0
ENSG00000061936	83	309	63	220	116	111	162	166	137	40	81	49	54	45	61	5	51	137	109	316	91	94	57	67	48	70	42	31	172	37	104	39	22
ENSG00000061938	0	128	0	152	35	27	40	1	24	116	34	1	5	23	49	0	0	49	42	53	3	74	22	16	3	30	46	42	33	9	2	39	1
ENSG00000061987	0	424	1	54	41	51	117	149	69	63	61	85	71	125	25	0	7	221	142	661	119	24	106	29	34	64	38	26	76	47	43	13	5
ENSG00000062038	48	659	6	99	101	171	111	49	483	80	100	208	179	5	110	3	30	265	111	227	251	296	252	57	33	165	48	153	229	59	173	65	6
ENSG00000062194	25	1312	69	550	347	260	342	578	394	526	265	332	383	404	212	37	36	418	471	1881	184	404	252	148	252	246	503	188	436	212	154	358	89
ENSG00000062282	9	31	56	221	43	47	9	0	39	78	66	94	0	0	3	69	14	36	39	2	80	152	6	43	145	21	1096	126	35	38	110	602	223
ENSG00000062370	0	31	0	49	0	2	1	0	0	97	12	0	0	0	14	0	0	3	0	0	0	0	0	2	0	1	4	0	13	0	0	1	0
ENSG00000062485	7	440	2	50	33	44	67	27	55	34	40	4	99	61	35	0	47	122	180	208	18	50	24	22	7	63	38	27	54	30	0	28	3
ENSG00000062524	72	0	0	4	2	4	3	9	9	1	0	0	0	0	0	0	0	0	25	0	8	0	0	4	4	0	1	0	26	3	0	0	0
ENSG00000062582	0	0	0	28	0	0	0	0	1	1	0	0	0	0	0	0	0	8	3	0	0	0	0	0	0	0	3	0	8	10	0	0	1
ENSG00000062598	0	278	1	67	7	17	27	0	30	4	24	19	49	95	1	0	0	64	89	103	42	1	46	2	14	33	7	3	12	25	0	20	1
ENSG00000062650	42	989	39	249	149	112	138	74	127	279	150	297	251	107	104	10	30	188	191	80	141	138	35	56	75	100	184	138	223	161	9	136	20
ENSG00000062716	233	1860	216	1303	607	449	651	784	670	1105	499	296	388	471	312	150	149	420	921	1349	453	1047	117	326	419	494	1700	664	531	590	303	1022	450
ENSG00000062725	47	548	9	170	69	59	125	141	168	283	94	105	107	151	123	26	14	118	190	300	100	126	127	39	35	103	54	45	158	77	6	80	21
ENSG00000062822	0	28	0	6	8	10	13	5	3	0	4	0	0	0	6	0	1	21	2	46	4	6	0	3	0	0	0	3	0	0	0	0	0
ENSG00000063015	0	0	0	0	1	0	0	0	0	0	0	0	0	0	0	0	0	18	0	1	0	20	1	0	0	0	3	11	0	0	0	12	0
ENSG00000063046	26	295	22	131	49	27	97	91	174	17	130	127	29	57	78	0	48	83	147	99	59	63	44	37	37	89	22	25	54	44	56	27	4
ENSG00000063169	1	20	0	13	16	10	11	0	14	0	17	0	2	0	7	0	0	18	24	0	18	46	0	11	0	1	5	2	11	0	0	0	0
ENSG00000063176	11	82	0	28	36	17	13	25	8	75	29	0	28	3	26	5	2	10	7	2	55	3	4	7	5	14	8	1	21	16	1	10	1
ENSG00000063177	324	4658	237	1119	960	675	1449	1007	1826	1719	1116	699	1294	1095	1200	71	212	1683	1258	3916	976	910	992	539	525	1632	445	576	1554	686	467	339	155
ENSG00000063180	0	0	17	27	1	6	5	39	0	0	29	0	7	0	4	0	7	16	7	0	0	0	1	4	6	7	6	0	57	1	0	0	0
ENSG00000063241	2	87	6	55	45	28	53	21	5	31	30	4	23	19	21	0	21	112	103	165	42	22	18	33	10	34	19	30	32	6	26	17	1
ENSG00000063244	41	636	12	414	119	140	305	162	251	306	147	150	125	93	146	8	36	323	378	1032	330	154	274	77	57	154	199	82	310	115	61	186	49
ENSG00000063245	37	279	18	145	55	57	62	49	69	137	42	17	41	51	51	13	4	101	101	268	163	115	77	23	21	47	39	16	73	42	36	115	43
ENSG00000063322	21	221	14	188	70	48	81	81	114	219	12	45	85	152	61	25	30	82	79	85	33	28	39	39	19	39	57	36	124	37	37	36	9
ENSG00000063438	0	0	0	14	7	0	27	2	0	0	2	0	0	0	0	0	0	3	0	0	0	0	1	0	4	12	4	7	6	0	1	0	1
ENSG00000063587	1	81	1	16	21	14	10	28	53	1	23	13	0	0	14	3	0	17	69	541	5	2	32	8	15	15	3	2	33	0	11	0	0
ENSG00000063601	13	190	0	156	79	27	104	76	40	61	41	68	66	78	29	1	15	101	48	99	22	48	61	13	17	65	50	62	91	53	97	22	2
ENSG00000063660	6	429	23	43	97	57	115	101	160	22	141	72	40	233	77	0	43	225	193	304	63	55	180	58	14	33	3	60	197	49	102	42	3
ENSG00000063761	0	64	0	5	7	8	21	0	6	1	9	1	0	0	19	0	1	20	30	164	0	2	18	1	1	15	1	22	5	10	1	7	0
ENSG00000063854	26	594	3	126	82	52	109	145	126	298	47	21	91	170	65	0	50	115	197	553	150	21	125	41	18	54	41	56	138	55	36	59	8
ENSG00000063978	1	134	0	27	30	0	32	1	25	69	19	1	18	29	31	3	1	38	17	128	27	36	40	4	5	7	26	17	67	23	7	17	1
ENSG00000064012	86	260	30	158	56	70	93	33	52	274	43	155	75	46	20	24	2	53	62	512	49	166	95	48	17	83	119	18	102	17	67	41	85
ENSG00000064042	29	639	30	173	127	63	129	138	111	465	62	46	76	79	53	0	25	122	108	192	35	13	14	21	19	58	9	14	111	69	4	7	3
ENSG00000064102	37	209	5	51	34	13	75	34	50	0	25	44	39	0	39	0	2	69	75	2	47	14	19	13	11	10	13	10	36	7	2	13	1
ENSG00000064115	73	274	28	98	120	34	193	166	288	413	46	138	125	328	74	5	4	316	115	1169	151	49	170	95	51	190	18	69	166	68	25	60	18
ENSG00000064195	0	0	0	0	0	19	1	2	27	45	0	0	0	45	1	15	0	16	0	0	15	0	8	0	0	6	2	0	9	0	84	0	0
ENSG00000064199	1	3	19	192	5	11	94	132	15	373	2	82	17	5	35	1	1	46	71	604	14	0	8	18	7	1	3	103	8	53	2	3	4
ENSG00000064201	0	40	0	0	0	4	0	0	0	0	0	1	0	0	0	0	0	0	0	0	0	0	0	0	0	1	0	0	0	0	0	16	0
ENSG00000064205	0	0	0	0	0	0	8	0	0	1	5	0	0	0	0	0	1	3	0	1	1	0	0	0	0	2	0	0	3	0	0	0	21
ENSG00000064225	1	105	6	81	27	35	13	18	46	1	6	0	24	37	10	19	0	52	10	2	22	78	8	0	24	29	60	40	25	27	41	22	14
ENSG00000064270	2	314	13	309	29	21	57	116	117	322	18	230	34	51	91	1	19	92	189	796	63	43	95	13	38	68	17	24	111	84	60	32	5
ENSG00000064300	0	0	0	0	3	3	8	1	3	0	12	3	17	2	3	4	0	14	0	0	0	0	0	0	0	19	0	0	0	0	0	0	0
ENSG00000064309	1	96	0	10	6	0	0	10	16	23	8	0	11	18	17	0	0	4	0	0	1	0	0	0	1	21	1	4	0	0	0	0	0
ENSG00000064313	39	543	1	165	55	41	122	50	116	7	62	31	105	12	57	2	15	110	107	311	73	19	26	33	15	18	33	75	78	28	38	17	2
ENSG00000064393	113	3240	48	558	163	134	359	421	517	497	121	382	434	177	287	12	148	482	704	1107	352	118	234	130	252	334	125	96	605	264	166	58	14
ENSG00000064419	18	571	40	307	154	94	288	218	364	516	134	348	219	142	93	6	34	216	114	524	174	44	136	97	51	115	91	101	206	106	105	88	21
ENSG00000064490	12	163	3	63	21	19	54	27	26	150	20	29	7	12	6	0	0	56	61	345	27	54	28	10	17	8	38	24	16	24	18	82	0
ENSG00000064545	26	360	1	57	19	24	78	11	87	74	30	17	49	43	22	0	10	70	72	99	72	4	46	19	10	30	15	15	46	45	54	43	1
ENSG00000064547	0	13	24	72	21	21	28	79	58	118	30	10	8	1	14	14	0	76	26	1	54	103	6	12	10	13	56	53	26	25	0	103	46
ENSG00000064601	68	951	60	314	199	234	238	118	374	31	192	105	195	328	121	14	36	583	349	355	370	217	157	127	70	184	117	82	262	261	30	186	49
ENSG00000064607	29	630	8	166	85	55	180	156	104	174	47	107	98	166	109	1	33	386	446	1346	127	94	186	38	38	65	16	34	180	83	39	11	20
ENSG00000064651	240	3747	51	598	362	290	578	469	1036	487	315	314	499	773	448	12	119	1242	784	2617	298	351	351	132	211	452	125	257	969	303	309	114	13
ENSG00000064652	2	266	9	12	41	12	91	50	37	2	46	10	59	104	55	0	5	67	93	230	35	34	1	24	4	64	11	8	29	44	78	22	2
ENSG00000064655	76	1161	112	255	118	83	293	86	267	230	91	96	107	138	187	3	63	273	328	558	132	61	150	61	69	164	22	91	210	79	60	17	11
ENSG00000064666	63	565	135	315	106	107	188	36	231	121	93	270	84	90	93	77	74	272	232	278	193	502	234	88	110	109	574	159	71	108	9	550	181
ENSG00000064687	2	228	16	135	19	102	40	66	83	175	15	30	33	133	57	10	0	62	18	276	50	23	48	20	32	37	24	30	43	54	17	23	17
ENSG00000064692	0	0	1	81	3	12	33	11	17	0	0	0	0	0	36	0	0	35	0	3	20	0	33	4	5	14	2	11	0	21	2	1	0
ENSG00000064703	9	48	0	29	32	2	20	15	38	5	16	0	9	30	11	1	3	8	27	83	7	1	4	2	6	6	2	4	36	13	1	10	0
ENSG00000064726	0	1	0	21	17	11	9	3	15	0	18	13	36	68	26	0	0	9	17	161	6	36	4	17	6	11	0	5	41	8	2	3	0
ENSG00000064763	23	3	0	32	5	0	13	0	6	0	2	1	5	1	0	0	0	3	54	0	5	23	1	4	19	4	21	4	21	8	2	17	0
ENSG00000064787	97	2533	144	810	530	254	611	1008	720	346	188	521	439	521	326	15	192	589	1143	3234	488	196	283	148	210	394	41	229	496	400	109	54	18
ENSG00000064886	0	0	0	0	0	0	0	0	29	0	0	0	0	0	0	0	0	0	0	0	13	7	1	0	3	4	13	0	0	5	0	0	0
ENSG00000064932	39	424	32	274	116	172	134	126	310	102	103	96	83	35	58	80	89	134	404	663	281	289	150	58	92	56	770	107	103	119	601	585	277
ENSG00000064933	9	98	7	47	28	15	79	43	28	118	22	4	30	55	36	0	2	88	28	72	25	2	64	10	11	16	8	0	46	38	0	1	0
ENSG00000064961	27	1332	19	227	110	94	380	175	318	344	90	153	237	190	103	9	72	266	312	1488	216	70	115	71	78	138	48	102	346	158	170	92	28
ENSG00000064989	0	0	0	1	0	0	0	0	0	0	6	1	0	0	2	0	1	0	0	0	0	0	22	0	4	27	1	0	0	0	1	0	0
ENSG00000064995	28	518	30	208	122	69	48	199	298	72	91	212	171	33	61	0	1	153	143	233	66	58	93	31	38	110	15	97	42	95	36	68	2
ENSG00000064999	0	101	8	100	9	40	41	7	25	297	26	2	57	11	25	1	11	62	28	152	51	2	29	10	12	29	7	15	54	29	3	24	10
ENSG00000065000	152	1162	61	574	305	201	156	189	304	348	221	171	169	179	141	36	68	304	335	947	165	300	200	113	55	119	153	98	230	165	141	93	9
ENSG00000065029	25	253	7	82	17	23	70	55	87	21	21	37	14	5	35	10	18	97	149	152	101	26	81	19	21	31	3	7	17	51	42	25	1
ENSG00000065054	3	190	0	138	71	65	95	38	204	107	26	25	53	74	38	8	32	63	155	487	23	55	4	32	18	113	11	42	68	93	1	6	0
ENSG00000065057	1	0	1	32	36	21	17	5	35	61	22	12	46	4	16	0	2	8	7	416	9	49	33	23	13	36	17	18	42	47	140	10	0
ENSG00000065060	39	174	1	24	34	10	21	31	75	27	22	0	15	3	33	0	2	11	26	378	63	10	54	5	26	42	0	18	29	11	2	8	0
ENSG00000065135	53	799	134	644	196	241	279	294	439	157	366	455	362	189	76	77	67	274	368	976	359	632	258	168	143	213	828	339	185	166	153	557	98
ENSG00000065150	60	124	33	101	35	36	63	93	108	182	39	29	67	160	84	1	7	96	102	20	37	30	94	24	15	71	10	24	59	30	5	28	2
ENSG00000065154	79	801	4	183	133	107	311	294	415	1533	139	391	355	514	265	6	64	541	556	1648	153	146	251	112	115	345	108	82	358	148	386	48	10
ENSG00000065183	2	203	1	10	18	23	60	78	85	162	112	4	85	8	44	2	2	73	133	269	23	33	66	12	12	56	7	8	30	34	45	4	1
ENSG00000065243	99	1032	50	362	226	96	285	311	268	86	105	203	261	294	97	50	62	189	117	395	95	158	94	87	90	186	231	189	308	117	79	117	4
ENSG00000065268	32	605	11	150	67	30	107	38	217	203	39	83	71	103	26	16	19	168	118	415	54	45	210	39	7	74	22	47	169	69	120	11	2
ENSG00000065308	2	104	0	32	13	14	5	4	22	1	0	23	10	0	8	0	0	43	20	2	24	0	12	6	2	38	2	4	30	0	3	0	1
ENSG00000065320	34	114	0	55	29	35	142	56	99	312	24	57	15	46	46	0	14	220	234	492	80	36	79	57	10	44	3	3	65	55	147	14	3
ENSG00000065328	1	0	1	0	7	10	0	0	7	0	14	0	0	0	0	17	2	12	0	1	1	2	1	1	0	0	1	0	0	0	0	5	0
ENSG00000065357	57	160	0	87	77	48	64	52	145	6	84	1	31	60	63	3	3	210	194	427	146	71	72	10	25	53	27	33	70	56	49	18	4
ENSG00000065361	80	2414	51	711	392	228	352	241	327	59	311	309	342	593	150	36	82	260	421	452	339	586	243	100	150	200	131	153	528	263	142	37	7
ENSG00000065413	1	183	36	96	29	48	21	56	25	2	19	102	75	47	26	14	5	43	67	0	12	147	1	29	47	44	202	68	19	70	14	216	86
ENSG00000065427	24	642	35	271	105	97	175	193	506	105	218	169	140	293	118	3	48	349	144	356	133	150	77	90	90	87	69	75	208	181	238	37	11
ENSG00000065457	50	76	16	115	16	12	60	65	26	71	36	0	42	23	32	5	20	72	271	174	27	84	52	9	8	24	31	31	118	79	2	41	14
ENSG00000065485	0	51	2	64	9	4	37	40	43	1	25	0	41	18	8	22	0	31	53	133	28	0	2	5	0	13	8	7	18	0	4	11	23
ENSG00000065491	13	111	6	21	27	8	37	7	68	54	15	3	3	2	19	0	33	40	12	242	30	24	31	21	10	19	7	21	39	14	3	1	2
ENSG00000065518	127	1425	23	117	195	109	251	184	296	421	107	125	278	317	152	9	27	267	338	767	132	144	165	121	101	328	73	112	397	101	31	58	11
ENSG00000065526	39	1043	84	412	132	89	51	220	326	8	120	204	76	288	169	42	9	167	132	891	164	232	44	60	52	70	45	153	223	62	107	102	38
ENSG00000065534	1	0	19	76	4	41	0	40	102	0	19	25	7	0	15	0	0	45	0	1	1	0	0	6	4	1	12	34	25	1	36	0	1
ENSG00000065548	93	1203	57	724	285	142	388	512	563	310	412	137	256	336	271	16	88	396	267	722	293	336	181	168	133	208	196	267	386	342	29	134	44
ENSG00000065559	45	508	70	83	63	21	69	72	122	140	64	93	48	96	33	12	2	79	110	189	26	55	56	25	42	51	120	84	76	25	114	65	25
ENSG00000065600	0	0	0	0	0	6	19	0	18	1	21	0	4	76	0	0	23	1	8	0	0	7	2	6	16	14	0	0	2	0	0	0	0
ENSG00000065613	343	6238	323	1664	1535	587	1418	1022	1287	547	1257	709	1405	913	633	79	59	1080	964	1914	323	516	436	374	324	795	523	730	1598	620	191	377	28
ENSG00000065615	43	505	23	198	48	54	70	130	88	65	86	91	92	166	44	22	3	138	72	26	45	212	3	63	59	62	254	134	192	77	117	176	19
ENSG00000065618	23	46	13	53	23	115	17	1	521	2	149	3	50	0	46	0	1	359	37	1	20	80	111	39	5	39	10	186	106	43	73	123	19
ENSG00000065621	5	0	1	85	35	1	50	33	15	26	17	0	16	37	8	0	23	71	20	93	47	44	5	6	20	55	11	2	33	18	2	7	0
ENSG00000065665	2	1	0	4	11	12	10	1	17	125	12	88	14	0	29	0	0	39	30	0	2	1	0	12	1	2	21	2	10	17	0	2	2
ENSG00000065717	0	146	1	30	16	16	16	10	34	29	18	1	21	9	10	1	0	39	32	79	52	11	11	7	6	6	4	3	3	0	0	0	1
ENSG00000065802	11	104	10	173	18	36	49	40	172	161	18	33	53	40	41	0	5	85	170	303	57	75	77	17	7	45	7	9	20	52	3	20	0
ENSG00000065809	323	5261	135	1482	852	756	1598	1227	1593	1792	339	599	1247	1189	774	69	241	2051	1740	2862	890	887	771	717	459	898	431	636	2186	763	583	377	83
ENSG00000065833	2	167	1	68	44	37	171	103	181	444	41	1	150	70	48	1	33	71	85	917	52	2	54	19	36	48	7	4	19	72	124	6	4
ENSG00000065882	29	220	46	235	84	82	152	138	128	144	83	209	156	174	107	35	39	208	273	601	216	100	165	81	36	180	130	141	172	116	43	131	40
ENSG00000065883	25	476	73	112	80	57	85	95	111	1	57	0	97	0	35	12	15	64	121	248	32	56	33	32	40	78	49	24	168	58	120	5	0
ENSG00000065911	35	152	27	70	90	61	39	41	183	167	121	30	152	2	59	0	3	208	368	985	42	214	57	21	65	102	173	75	82	66	4	92	17
ENSG00000065923	62	140	11	61	12	41	97	101	117	3	93	137	81	53	62	0	1	85	75	365	77	75	49	44	27	32	3	25	81	70	1	3	4
ENSG00000065970	22	236	3	89	69	68	84	38	104	56	45	4	77	13	26	6	0	56	114	80	20	103	68	30	12	46	18	54	155	75	72	42	26
ENSG00000065978	105	1720	121	372	258	158	421	450	676	297	447	232	313	197	267	13	113	498	188	565	142	167	209	217	139	319	138	170	377	309	118	142	23
ENSG00000065989	0	34	4	51	14	27	48	44	82	0	25	20	5	0	28	4	9	64	79	754	32	1	47	18	3	30	18	11	30	19	3	59	1
ENSG00000066027	52	326	6	101	68	65	64	223	134	120	58	22	162	119	88	14	2	198	203	385	39	75	45	40	47	112	152	30	196	52	248	110	19
ENSG00000066044	71	318	5	168	83	67	176	165	156	642	100	76	104	156	120	0	32	327	320	684	170	242	83	69	57	62	47	47	235	112	62	81	9
ENSG00000066056	0	0	0	0	0	0	0	0	1	0	0	0	0	0	0	18	0	0	1	0	1	1	0	0	0	0	0	0	0	0	0	0	9
ENSG00000066084	1	357	8	146	38	30	69	34	92	94	36	1	75	106	22	1	0	65	148	350	16	51	52	31	30	15	145	30	42	34	146	52	40
ENSG00000066117	14	3	22	97	10	11	29	33	48	168	11	1	16	2	27	0	10	18	63	0	13	10	3	16	8	16	3	5	81	35	1	1	0
ENSG00000066135	1	491	20	225	36	81	126	36	112	138	50	12	47	63	38	6	35	150	164	637	97	35	20	23	20	52	29	26	73	62	7	38	2
ENSG00000066136	18	217	27	48	34	9	48	27	49	2	43	1	64	41	33	3	19	49	104	393	37	24	96	27	13	31	25	10	61	22	64	17	28
ENSG00000066185	0	0	1	1	1	0	0	10	0	0	0	0	18	0	2	0	0	0	0	0	0	0	0	1	0	0	0	0	0	3	0	0	1
ENSG00000066248	0	0	0	0	0	1	10	9	7	0	2	81	0	0	0	0	0	10	62	0	22	2	0	3	0	12	0	6	0	3	0	0	2
ENSG00000066279	1	116	1	29	6	9	0	20	34	0	28	2	16	1	8	0	1	43	0	2	7	0	30	3	0	17	0	0	4	0	1	0	0
ENSG00000066294	1	474	9	26	7	5	6	18	44	0	17	106	52	91	2	0	0	35	9	0	16	91	42	18	37	4	9	17	61	36	32	1	0
ENSG00000066322	36	71	29	271	109	96	184	111	143	63	195	58	95	38	65	8	19	328	106	198	219	177	199	35	34	46	62	114	70	99	229	189	6
ENSG00000066336	2	164	12	47	30	35	2	3	6	4	19	1	29	0	7	43	0	3	17	0	29	164	2	15	42	17	402	39	0	14	161	200	51
ENSG00000066379	0	107	6	21	7	27	36	3	15	52	6	1	43	0	10	0	26	30	27	90	20	25	12	15	5	46	3	8	25	16	89	31	1
ENSG00000066382	0	130	0	28	5	3	0	0	2	0	15	0	15	0	5	20	0	0	30	0	1	41	2	0	4	1	5	2	32	3	38	0	0
ENSG00000066422	33	279	3	59	14	16	58	54	54	112	31	27	33	68	46	0	20	33	61	410	42	57	57	29	26	63	42	30	72	78	158	37	1
ENSG00000066427	0	77	2	173	34	44	127	165	122	6	72	17	151	51	51	5	31	84	253	156	64	37	87	49	26	28	8	44	183	97	70	45	67
ENSG00000066455	43	403	4	108	136	44	60	123	153	434	61	28	111	150	73	2	28	265	76	0	51	18	85	44	47	54	81	84	137	81	157	18	3
ENSG00000066468	9	374	1	37	23	35	52	41	46	1	21	0	24	63	28	0	9	80	73	76	46	76	59	43	22	48	2	7	97	11	30	10	1
ENSG00000066557	8	2	0	20	16	7	39	13	47	2	20	1	0	0	15	0	0	54	104	1	1	1	73	6	15	0	7	3	36	4	0	27	0
ENSG00000066583	0	258	1	26	23	14	35	28	19	108	24	57	28	48	12	0	14	99	154	222	28	11	44	14	17	58	4	20	78	16	58	0	3
ENSG00000066629	0	0	1	122	4	4	0	37	1	54	10	2	0	0	13	38	0	20	6	194	2	0	0	2	13	0	0	0	0	0	2	1	1
ENSG00000066651	32	43	1	44	22	8	27	41	41	72	29	0	8	0	28	0	1	17	49	215	34	5	2	11	21	1	3	10	20	10	2	0	1
ENSG00000066654	31	421	14	145	51	53	124	147	123	0	65	87	100	100	83	1	4	159	221	401	64	106	45	46	63	76	46	21	42	89	8	31	3
ENSG00000066697	6	164	0	36	22	16	72	19	21	0	37	1	36	123	5	3	0	24	16	205	32	29	32	10	13	4	4	6	55	40	3	30	10
ENSG00000066735	0	0	0	0	9	0	0	0	0	0	7	0	0	0	0	0	0	0	0	0	1	0	0	0	0	0	0	0	1	0	0	0	0
ENSG00000066739	14	209	2	122	42	18	78	41	121	121	33	62	52	38	36	0	0	82	47	0	37	12	14	28	11	54	6	31	74	8	3	6	0
ENSG00000066777	71	912	24	500	253	129	273	209	476	63	187	361	307	319	212	17	111	321	274	869	136	151	31	92	106	190	153	136	223	224	237	82	75
ENSG00000066813	0	0	0	14	12	0	0	0	0	0	0	0	0	0	0	12	19	5	0	0	0	0	0	0	0	0	0	0	0	0	0	0	0
ENSG00000066827	0	74	0	70	4	18	25	47	16	0	0	58	1	0	21	6	1	18	36	2	37	41	0	4	8	8	35	9	6	6	38	1	0
ENSG00000066855	28	31	9	31	27	25	54	68	75	55	32	1	39	12	12	7	2	50	23	2	20	23	27	13	11	11	6	24	25	34	2	24	3
ENSG00000066923	0	0	0	15	0	0	0	1	1	0	0	0	1	0	2	0	0	0	0	0	0	0	0	0	0	0	0	15	0	0	0	0	2
ENSG00000066926	1	65	0	16	30	0	53	32	39	115	0	4	36	53	23	0	0	71	47	2	1	50	12	9	7	37	2	13	35	34	1	1	42
ENSG00000066933	33	546	32	71	54	21	92	80	117	2	37	1	71	109	57	10	14	136	184	368	53	20	93	50	27	85	35	22	112	60	4	34	3
ENSG00000067048	1	3	20	104	40	2	1	2	1	210	0	2	1	0	0	1	0	0	1	108	25	150	90	0	30	59	139	129	11	90	39	228	14
ENSG00000067057	5	728	11	84	36	59	87	72	266	194	179	135	93	27	86	5	3	141	177	133	120	65	282	35	26	78	50	45	176	27	35	29	3
ENSG00000067064	37	234	26	99	61	37	80	87	86	169	32	187	52	55	54	31	3	62	130	1044	30	34	20	44	40	45	394	110	71	49	130	239	81
ENSG00000067066	17	909	31	239	129	137	273	201	269	91	89	211	180	231	157	25	28	292	162	349	195	110	99	92	139	118	359	194	195	116	51	181	7
ENSG00000067082	156	2291	349	908	368	224	256	369	602	364	326	818	316	616	127	183	253	784	973	2130	721	1823	353	328	312	258	1024	395	457	304	563	1642	685
ENSG00000067113	0	237	0	50	30	13	29	31	79	0	19	1	60	36	9	18	0	65	111	88	38	23	23	33	8	15	1	23	95	22	2	4	2
ENSG00000067141	62	354	16	87	51	61	164	53	132	231	30	123	123	130	87	13	38	253	287	406	81	91	67	57	60	122	21	41	216	68	7	23	0
ENSG00000067167	126	968	16	303	172	117	223	203	298	491	148	259	181	280	146	16	12	323	399	975	175	134	160	118	106	183	108	104	274	172	138	72	9
ENSG00000067177	30	119	0	13	18	5	53	27	14	108	2	0	9	34	4	0	0	18	71	35	0	41	30	10	3	7	13	1	32	2	1	2	0
ENSG00000067182	79	949	108	473	196	238	153	163	453	363	231	297	168	163	134	104	84	408	266	1363	383	606	203	189	135	183	1227	346	260	250	564	539	146
ENSG00000067191	1	232	0	46	17	60	9	3	12	95	0	42	3	53	17	1	21	35	98	5	29	1	4	10	7	11	0	0	48	6	0	16	2
ENSG00000067208	55	147	47	290	95	65	144	101	253	128	83	42	75	119	122	2	2	107	170	510	52	140	68	42	63	86	48	31	78	48	3	55	14
ENSG00000067221	0	0	0	27	14	31	53	0	37	2	16	0	22	13	21	0	1	65	20	92	29	7	80	5	39	40	12	14	59	11	56	1	17
ENSG00000067225	245	3458	296	803	540	421	580	633	1163	893	717	590	892	992	470	58	201	1250	995	2080	758	505	1141	212	163	510	335	431	1090	587	436	379	79
ENSG00000067248	65	675	20	254	117	71	125	90	130	135	152	3	87	58	91	0	28	242	127	241	87	42	38	79	44	198	26	80	115	101	5	22	8
ENSG00000067334	37	916	214	553	170	135	286	206	309	120	136	309	145	88	159	6	83	159	141	341	113	247	69	175	189	129	565	313	171	113	64	443	105
ENSG00000067365	0	1	4	20	11	13	12	27	1	23	2	1	22	17	0	0	0	38	17	217	1	56	2	1	0	10	24	8	15	3	1	26	4
ENSG00000067369	29	336	16	429	61	69	211	210	133	276	75	148	78	66	117	2	21	159	230	365	137	66	178	72	65	102	81	106	120	128	67	79	64
ENSG00000067445	0	0	0	0	0	6	0	1	1	0	0	1	0	0	10	0	0	9	0	0	0	0	0	0	0	1	0	0	1	0	0	0	0
ENSG00000067533	29	312	7	62	45	27	87	51	158	123	96	26	83	15	81	1	11	152	40	222	35	33	22	44	22	27	29	12	46	72	6	37	4
ENSG00000067560	300	7386	242	1771	1035	651	1615	1678	2455	2275	1082	1130	1697	2014	921	187	362	2104	2606	8452	1409	2142	1668	709	591	1385	1104	812	1866	1039	811	920	130
ENSG00000067596	0	488	3	115	56	25	52	60	125	43	52	142	69	26	21	4	31	94	96	240	45	84	21	8	5	41	75	31	162	34	41	50	5
ENSG00000067601	0	0	0	12	1	0	11	3	0	0	0	0	0	0	5	0	0	0	0	0	0	13	0	0	0	0	0	0	0	0	0	0	0
ENSG00000067606	5	140	9	233	29	33	41	85	31	75	27	94	31	98	8	27	49	21	127	113	59	73	9	18	3	22	36	14	30	17	0	33	3
ENSG00000067646	0	0	0	26	5	0	0	0	1	0	0	0	0	0	0	0	0	0	0	0	24	0	1	0	5	10	10	4	11	9	0	3	0
ENSG00000067704	27	478	7	227	69	43	130	189	209	423	57	381	140	18	145	0	29	286	157	1114	110	84	71	55	58	110	35	52	212	33	30	16	17
ENSG00000067715	1	0	0	0	0	0	20	8	9	0	8	3	10	0	0	0	0	1	0	2	1	21	0	0	1	0	0	0	0	3	0	0	0
ENSG00000067798	0	0	0	0	0	0	0	0	0	0	1	0	0	0	12	0	1	0	0	0	0	0	0	0	0	1	0	1	0	3	0	1	24
ENSG00000067829	7	68	14	32	11	16	26	58	69	32	22	54	5	23	8	0	0	23	10	1	56	1	6	15	12	25	23	7	48	48	32	1	2
ENSG00000067836	9	142	11	121	25	38	85	2	52	17	27	0	45	1	28	0	1	99	49	329	34	39	37	39	10	38	5	41	40	35	4	17	1
ENSG00000067842	0	0	0	0	0	0	0	0	0	0	1	0	0	0	0	0	14	0	0	0	0	0	0	6	0	0	0	0	0	3	0	5	0
ENSG00000067900	134	506	131	726	271	200	317	347	456	307	298	404	213	309	119	46	35	320	235	538	281	355	66	131	132	171	640	347	355	222	256	375	205
ENSG00000067955	71	234	2	72	54	70	107	84	108	0	103	49	112	88	72	11	40	148	68	3	33	125	120	54	50	67	21	39	128	62	2	18	36
ENSG00000067992	30	79	1	24	11	12	12	22	1	3	10	111	7	0	22	0	0	43	44	1	9	84	2	17	6	36	58	40	33	25	0	29	3
ENSG00000068001	6	247	0	12	41	25	45	20	48	74	21	3	20	1	20	0	0	26	38	0	67	0	104	15	22	56	7	9	82	34	1	3	0
ENSG00000068024	0	0	4	84	7	15	19	39	23	0	19	0	1	0	25	1	0	29	45	0	5	18	20	11	23	15	86	28	34	41	0	49	15
ENSG00000068028	11	5	14	17	4	17	31	4	97	27	67	35	35	2	6	0	2	109	113	217	34	69	38	26	29	16	18	7	82	19	2	70	1
ENSG00000068078	15	639	6	84	115	83	130	82	341	110	228	89	287	138	121	1	28	239	6	1	131	138	296	24	16	207	33	67	333	63	12	30	4
ENSG00000068079	2	174	1	49	6	10	70	43	94	1	20	2	62	15	15	0	1	19	34	442	45	51	46	10	21	6	23	4	6	38	54	20	0
ENSG00000068097	13	64	1	115	3	9	15	12	27	1	27	1	43	73	16	0	2	62	35	2	3	77	45	2	2	7	1	1	24	14	97	0	0
ENSG00000068120	28	167	7	55	33	32	70	28	52	4	21	0	40	0	42	8	2	53	43	5	14	48	20	15	4	27	19	15	40	60	2	18	3
ENSG00000068137	25	582	12	119	109	111	180	101	189	262	87	5	128	171	110	0	96	278	277	153	216	119	279	63	37	101	20	46	230	63	118	32	28
ENSG00000068305	19	737	41	300	192	121	197	180	211	216	114	118	129	207	131	21	2	312	241	623	90	195	128	76	52	81	109	90	144	89	8	69	30
ENSG00000068308	104	583	40	390	104	142	189	161	135	288	128	5	73	187	135	39	122	292	255	1264	298	161	178	75	75	117	183	117	176	178	55	195	100
ENSG00000068323	5	378	21	183	52	57	63	34	43	5	90	69	13	70	21	48	15	61	44	8	70	257	40	47	60	27	206	117	45	60	99	288	116
ENSG00000068354	25	109	22	0	35	32	17	37	1	192	5	0	14	98	23	0	5	9	53	1	15	0	50	10	3	8	24	11	18	19	45	17	11
ENSG00000068366	32	327	48	296	74	89	69	76	154	384	92	147	115	2	94	19	0	175	136	119	77	140	65	61	47	82	293	163	69	68	83	108	130
ENSG00000068383	3	494	25	64	83	35	51	25	24	65	55	46	7	63	25	0	1	68	56	88	33	54	60	33	24	49	28	38	77	57	3	30	54
ENSG00000068394	9	22	4	40	34	11	39	9	17	44	5	0	14	4	5	11	0	48	24	105	34	24	1	13	1	8	8	6	61	52	1	1	2
ENSG00000068400	41	818	48	301	168	71	173	162	244	114	167	140	111	118	77	35	38	260	108	729	214	118	90	85	59	134	159	103	267	125	129	133	77
ENSG00000068438	3	68	0	9	26	4	36	41	9	73	34	0	35	0	8	0	0	39	16	1	12	11	10	13	5	7	15	20	64	8	0	10	2
ENSG00000068489	4	213	11	21	5	13	20	1	40	0	5	13	16	2	11	0	17	59	0	3	5	2	0	5	6	10	8	39	2	16	47	1	9
ENSG00000068615	0	0	0	0	0	0	6	0	0	0	0	2	0	0	0	0	0	14	0	0	7	0	0	0	0	4	0	8	0	0	0	0	0
ENSG00000068650	1	274	29	48	27	54	18	13	0	1	47	21	38	0	13	15	4	31	37	91	42	35	43	7	23	52	51	34	69	53	2	78	7
ENSG00000068654	23	62	6	69	29	12	54	14	14	155	30	41	19	38	7	0	15	54	44	162	18	1	118	6	12	1	18	29	104	17	0	10	29
ENSG00000068697	607	9058	217	2585	1295	987	1962	2170	2555	2222	1369	869	2151	1745	1735	167	282	2715	2802	4363	1210	1584	1340	820	759	1410	917	835	3127	1136	841	606	215
ENSG00000068724	0	142	1	41	14	10	53	32	19	1	14	60	9	22	12	0	1	53	49	66	19	21	1	12	3	14	17	24	30	22	18	3	2
ENSG00000068745	46	504	3	232	82	109	179	171	251	439	73	132	222	133	100	3	43	285	359	884	182	73	158	63	71	147	80	72	352	89	152	158	52
ENSG00000068784	2	1	28	36	3	28	25	9	85	54	29	80	30	15	28	9	1	20	60	17	17	62	14	7	10	11	19	14	2	17	78	22	5
ENSG00000068796	37	549	57	351	56	100	253	191	188	193	85	163	136	60	173	1	29	256	163	75	124	122	139	90	30	122	40	167	150	134	7	18	7
ENSG00000068831	5	2	1	75	18	14	0	0	20	6	10	1	11	0	5	19	0	11	15	1	13	78	0	24	4	1	177	27	7	19	1	203	81
ENSG00000068878	5	762	15	243	149	115	181	283	298	207	238	138	255	186	153	6	75	326	188	1250	207	310	75	99	76	103	140	118	233	110	118	151	33
ENSG00000068885	46	217	2	67	27	20	111	80	56	199	10	30	30	0	63	5	16	71	62	481	36	0	9	35	0	43	2	8	27	57	32	15	4
ENSG00000068903	23	177	7	126	45	38	81	53	75	101	26	176	35	38	16	25	8	107	78	299	61	9	45	20	24	36	94	35	110	37	1	24	5
ENSG00000068912	51	920	30	251	130	34	267	143	232	353	65	72	207	115	119	0	26	156	184	1672	160	100	85	38	62	112	25	43	200	111	136	22	4
ENSG00000068971	2	35	0	35	10	5	10	35	1	74	15	1	3	7	3	0	0	37	13	0	42	36	10	10	11	13	11	19	36	12	3	23	0
ENSG00000068976	1	0	0	0	2	0	0	0	0	1	0	0	0	0	0	1	0	0	12	0	0	0	0	0	0	0	8	0	0	0	0	11	0
ENSG00000069011	156	800	125	307	421	219	226	205	274	311	383	201	256	965	177	42	96	515	469	1216	573	560	333	101	119	186	247	206	792	385	179	182	96
ENSG00000069020	50	1040	131	569	194	147	238	178	490	19	329	106	233	164	166	16	96	600	328	378	140	591	185	80	62	165	105	209	230	198	13	76	71
ENSG00000069122	0	0	0	10	0	4	0	0	11	0	0	0	0	0	1	0	0	0	5	0	9	0	18	0	0	0	0	0	0	0	0	0	0
ENSG00000069206	0	0	0	0	0	6	0	0	0	0	0	0	0	0	0	0	0	0	0	0	0	0	0	0	0	0	7	0	0	0	0	0	0
ENSG00000069248	5	295	2	161	47	17	70	48	42	0	35	4	73	24	32	0	18	72	39	143	24	4	75	29	6	34	2	6	80	43	2	20	0
ENSG00000069275	213	4398	193	1562	720	481	1209	1031	1887	984	784	988	896	874	1122	25	157	1622	1523	3706	572	448	854	383	412	845	143	486	1069	673	296	176	50
ENSG00000069329	70	855	83	382	163	110	302	300	308	255	204	180	167	111	151	4	30	198	297	1015	167	192	126	143	75	241	156	199	260	148	120	109	3
ENSG00000069345	14	751	31	199	152	56	89	176	191	173	124	17	222	154	119	20	6	106	125	282	108	110	102	65	48	107	63	189	175	76	65	59	7
ENSG00000069399	239	4798	246	1406	294	413	485	261	546	331	325	539	315	102	195	383	293	543	580	583	902	1319	587	304	464	258	2493	394	532	646	1332	2344	960
ENSG00000069424	3	74	1	46	3	0	2	0	8	44	9	5	2	0	0	14	0	14	0	13	23	28	1	2	7	11	2	0	8	10	2	7	0
ENSG00000069431	0	0	0	0	13	0	1	0	0	0	0	0	0	0	1	0	1	2	0	0	10	0	0	0	0	0	3	0	0	4	0	1	0
ENSG00000069493	0	171	7	145	39	55	130	37	160	231	30	1	21	104	66	0	2	163	147	2	12	23	50	10	27	13	1	3	70	63	2	21	14
ENSG00000069509	20	213	0	143	33	55	94	96	145	65	61	69	72	93	69	0	43	106	124	604	25	27	51	60	31	65	30	48	67	53	124	14	3
ENSG00000069535	0	0	0	61	0	16	74	32	46	43	9	71	0	0	30	0	0	13	34	214	2	0	1	18	0	14	1	0	2	0	0	2	0
ENSG00000069667	16	654	15	136	153	85	117	175	251	111	76	64	96	224	69	5	71	195	105	6	136	72	98	47	26	59	34	78	208	144	1	11	18
ENSG00000069696	0	0	0	0	0	0	0	0	0	0	0	19	1	0	0	0	0	21	0	0	0	0	12	1	0	0	0	0	0	0	0	0	0
ENSG00000069702	2	33	0	97	27	12	12	52	29	183	9	83	0	2	18	2	2	76	8	225	51	1	59	6	0	14	2	14	23	38	0	2	17
ENSG00000069712	1	41	7	11	16	0	40	9	1	104	10	0	0	0	27	0	0	0	0	0	0	1	0	11	0	3	8	0	3	4	0	4	0
ENSG00000069764	3	105	20	41	20	32	66	24	112	81	2	11	19	77	19	0	1	74	133	36	111	1	79	14	6	60	7	1	118	17	1	4	1
ENSG00000069812	8	212	22	68	41	15	15	28	45	0	86	88	25	96	27	9	18	62	6	39	45	126	1	11	3	15	21	10	86	18	13	23	39
ENSG00000069849	125	2417	33	531	587	422	487	551	793	358	821	297	722	578	398	18	191	1115	436	425	217	536	305	170	87	519	214	215	677	336	207	260	44
ENSG00000069869	2	180	0	1	13	11	10	45	2	0	12	120	29	0	4	0	0	15	1	50	8	21	3	3	13	21	10	23	22	1	3	13	1
ENSG00000069943	17	1	18	14	4	0	13	1	6	1	17	1	13	21	2	1	0	22	10	0	2	18	0	7	1	5	46	18	25	1	38	22	2
ENSG00000069956	95	2143	42	218	237	157	322	235	386	88	227	275	190	143	133	26	18	388	280	700	211	149	154	97	169	124	88	144	335	91	150	18	10
ENSG00000069966	11	262	1	46	21	56	22	23	66	105	35	129	62	88	26	2	30	106	144	215	35	98	1	35	38	17	17	21	38	40	37	4	41
ENSG00000069974	27	299	22	233	98	59	96	74	205	326	92	121	155	104	53	16	22	114	183	478	70	82	35	61	49	118	317	155	86	54	66	95	11
ENSG00000069998	0	177	0	39	8	13	26	10	6	0	2	0	24	33	15	6	2	43	43	72	8	3	2	12	18	8	9	12	3	11	30	1	0
ENSG00000070010	2	913	11	148	52	115	143	92	101	103	159	17	111	9	79	16	28	237	122	11	114	1	54	58	30	126	108	82	135	93	160	77	43
ENSG00000070018	1	499	1	39	38	16	79	38	79	9	29	75	77	63	16	1	15	82	55	2	19	1	5	14	11	31	16	25	38	27	32	1	22
ENSG00000070047	69	475	39	106	91	88	103	76	200	175	108	194	141	146	63	1	31	180	198	373	153	73	234	66	34	63	26	58	97	71	61	20	2
ENSG00000070061	2	44	0	61	36	17	47	53	31	191	11	29	14	0	16	0	0	45	28	261	13	2	25	6	14	25	6	20	0	27	22	9	3
ENSG00000070081	170	895	99	2068	267	112	1061	1082	270	1601	161	355	110	134	657	3	24	556	1229	2771	407	153	152	292	240	436	118	475	255	345	32	67	27
ENSG00000070087	68	574	3	332	101	79	376	438	105	1429	58	125	184	234	161	0	38	373	813	2700	208	28	154	98	30	176	34	120	187	100	133	33	7
ENSG00000070159	14	1030	15	228	267	96	191	188	204	311	77	83	188	329	150	0	62	261	577	1248	171	176	242	44	17	202	41	68	450	72	6	32	10
ENSG00000070190	16	1413	47	359	161	183	309	332	221	408	183	252	247	172	165	56	44	172	423	592	214	305	151	131	215	135	636	144	194	121	309	162	98
ENSG00000070214	65	637	13	153	128	74	195	130	275	285	129	133	137	48	93	6	25	326	327	167	142	131	139	72	29	218	32	66	190	71	64	74	30
ENSG00000070269	1	118	1	188	21	12	50	58	30	337	40	80	52	114	46	1	1	142	95	2	46	64	40	16	23	105	39	46	53	49	30	54	8
ENSG00000070366	24	603	3	123	88	29	103	46	121	178	14	48	78	3	62	3	1	139	107	260	68	40	84	13	20	45	19	26	117	49	1	18	11
ENSG00000070367	43	541	1	190	76	42	110	203	222	142	97	153	178	17	111	1	75	145	278	5	23	118	72	25	94	95	31	107	96	56	11	22	1
ENSG00000070371	0	8	0	0	0	0	0	0	3	0	4	0	8	0	0	0	0	0	0	0	1	0	0	3	0	0	4	1	0	0	0	0	0
ENSG00000070388	0	1	0	17	1	0	0	0	11	0	0	0	0	0	1	23	0	0	5	0	0	0	0	1	0	0	0	0	0	1	0	0	0
ENSG00000070404	0	0	0	3	2	5	9	1	25	73	4	0	0	0	1	0	0	12	0	0	13	16	0	2	0	11	18	4	8	1	1	0	0
ENSG00000070413	35	872	16	230	132	187	424	249	275	54	82	358	316	154	181	53	84	491	812	1447	382	262	269	70	53	148	122	64	386	82	481	150	50
ENSG00000070423	16	793	1	118	55	70	135	67	164	3	80	31	66	57	61	18	19	265	266	916	133	57	119	28	43	59	13	3	220	42	37	18	0
ENSG00000070444	55	197	40	48	51	26	66	5	44	31	42	77	18	95	19	1	24	43	55	129	42	89	51	9	16	12	52	17	69	23	4	60	9
ENSG00000070476	17	139	12	112	58	50	23	103	40	83	23	8	34	98	18	18	9	135	104	240	27	60	48	20	26	44	33	37	28	47	0	17	84
ENSG00000070495	17	114	50	117	35	23	7	19	6	154	34	66	34	46	0	11	20	19	81	1	14	87	1	16	28	22	146	26	40	31	0	146	26
ENSG00000070501	3	920	38	253	135	101	137	149	299	128	152	139	322	263	77	36	48	190	98	330	84	269	235	40	108	66	146	188	320	180	141	109	62
ENSG00000070526	10	900	17	325	140	86	277	150	198	568	103	420	85	189	129	1	78	352	448	970	98	96	236	89	60	330	32	53	96	136	5	8	6
ENSG00000070540	62	383	17	123	71	39	99	78	152	41	74	4	60	2	77	0	16	119	73	108	86	85	51	47	8	41	43	50	100	49	63	22	58
ENSG00000070610	3	373	10	136	65	51	105	112	102	74	62	60	42	40	54	6	31	204	109	450	130	48	121	36	17	24	16	14	57	25	5	40	32
ENSG00000070614	35	340	47	80	66	46	123	34	242	263	156	106	73	70	57	15	31	276	179	153	114	7	159	30	19	91	14	36	249	54	37	67	43
ENSG00000070669	2	0	16	26	3	20	16	2	3	1	6	33	0	51	7	5	8	54	9	272	15	9	23	6	3	0	1	1	30	14	0	8	19
ENSG00000070718	0	30	13	216	1	38	43	4	31	177	13	27	12	1	47	1	9	50	64	7	18	0	11	12	1	37	10	15	22	30	2	22	3
ENSG00000070729	0	1	0	9	0	0	0	17	0	0	0	0	0	0	0	1	0	0	0	0	7	13	0	0	0	7	0	20	0	0	0	7	0
ENSG00000070731	5	20	1	195	20	6	118	94	53	124	34	58	16	55	76	0	24	52	99	603	36	40	59	15	10	8	53	58	66	47	7	54	1
ENSG00000070756	685	11443	697	3799	2273	1624	3331	1930	3879	2198	2209	2252	2239	2563	2059	279	454	3210	2498	8848	2200	2913	2075	1182	1065	2392	2204	1463	2789	1749	2218	2241	419
ENSG00000070759	0	78	0	34	14	7	12	16	13	0	21	0	29	0	9	0	19	32	13	0	11	38	23	5	14	10	11	7	8	0	39	23	0
ENSG00000070761	7	82	2	40	27	18	76	33	19	147	7	39	48	133	21	1	1	31	96	326	27	2	21	9	3	58	16	24	53	17	4	10	0
ENSG00000070770	24	716	13	108	93	65	157	116	175	104	85	100	208	55	64	5	42	251	122	257	81	39	66	41	21	101	31	11	225	57	24	42	1
ENSG00000070778	0	98	0	68	14	37	27	6	54	21	1	32	22	0	29	0	1	16	47	16	19	40	42	1	2	25	1	16	59	1	2	16	0
ENSG00000070785	11	35	0	35	12	9	13	3	68	1	26	2	19	0	46	0	0	47	49	149	4	7	38	6	11	12	5	13	12	24	2	0	0
ENSG00000070808	0	0	0	0	0	6	0	0	0	0	0	0	0	0	0	0	0	13	0	0	0	1	1	1	0	1	6	0	0	0	0	0	0
ENSG00000070814	18	171	3	104	62	23	34	4	29	1	51	72	38	1	46	0	6	76	39	86	65	69	14	5	9	20	8	27	55	29	5	29	20
ENSG00000070831	107	1645	67	514	378	282	502	587	456	982	251	714	619	778	314	66	83	629	778	2137	416	612	143	233	231	470	879	228	531	215	286	433	185
ENSG00000070882	73	324	21	171	67	93	101	176	89	176	73	5	54	248	58	0	7	189	162	1184	62	120	16	21	27	72	17	97	110	45	51	39	3
ENSG00000070950	1	59	0	23	7	4	35	9	53	0	50	0	13	42	4	0	1	16	14	2	2	0	2	15	4	3	4	0	1	9	0	6	0
ENSG00000070961	76	1455	145	718	397	252	305	334	368	497	265	598	223	280	122	98	42	476	270	827	270	1480	100	259	312	223	919	480	424	135	406	626	297
ENSG00000071051	69	272	19	143	78	49	121	66	131	124	32	21	158	52	110	7	9	170	246	446	71	79	114	46	11	69	80	27	138	23	168	65	1
ENSG00000071054	69	868	309	696	250	353	321	148	612	137	307	494	293	238	170	127	78	660	401	1005	297	748	184	182	214	171	643	375	411	326	285	455	263
ENSG00000071073	30	418	12	44	85	50	81	85	61	92	45	89	96	74	30	31	1	63	212	19	81	159	79	51	59	66	61	60	19	32	2	30	2
ENSG00000071082	187	3405	104	940	624	513	1103	1008	1156	1366	1285	533	1155	1106	954	27	168	1566	1126	4559	747	994	453	459	533	936	297	584	793	514	297	364	56
ENSG00000071127	54	900	36	369	191	245	348	266	292	628	216	330	389	531	166	34	86	475	399	832	292	349	212	164	152	182	272	140	273	203	181	416	59
ENSG00000071189	21	441	17	87	41	49	131	89	90	69	62	1	144	1	45	1	10	110	168	68	23	72	7	43	46	42	76	102	80	71	2	90	1
ENSG00000071205	4	188	3	31	46	28	31	0	17	1	44	31	80	37	27	13	0	18	41	1	48	103	28	11	3	3	8	35	108	10	2	7	0
ENSG00000071242	1	38	13	176	31	62	74	81	127	144	33	12	14	4	50	4	11	120	142	684	138	75	60	60	27	49	20	26	124	52	7	4	3
ENSG00000071243	20	460	12	246	89	77	99	183	129	8	41	11	61	220	33	6	44	228	183	141	108	54	117	57	68	74	156	45	74	60	28	151	2
ENSG00000071246	0	204	0	0	0	11	22	10	12	0	29	0	10	1	5	1	2	23	24	111	20	19	2	10	7	0	1	0	16	8	0	0	1
ENSG00000071282	6	0	0	55	15	1	44	1	51	51	0	2	28	0	38	0	4	35	78	22	11	0	0	0	0	27	0	1	19	16	3	0	0
ENSG00000071462	103	1012	36	404	167	124	322	352	250	384	258	359	207	336	152	36	73	316	310	1946	272	336	222	153	44	197	72	167	446	284	43	79	41
ENSG00000071537	78	1099	40	552	186	79	202	242	247	255	124	380	236	184	142	33	54	356	199	372	167	96	42	98	79	129	170	114	334	167	235	117	7
ENSG00000071539	0	33	0	24	1	9	15	14	1	0	15	29	32	0	17	0	1	9	55	120	26	1	0	5	0	5	4	7	4	5	1	0	8
ENSG00000071553	87	1145	28	333	117	157	278	149	242	504	131	269	260	182	177	3	36	202	187	344	62	132	122	123	74	116	116	95	286	209	47	60	7
ENSG00000071564	9	303	1	54	41	57	55	41	72	107	35	42	53	9	73	0	14	84	128	245	47	43	82	19	37	45	26	40	110	45	20	30	2
ENSG00000071575	284	5447	117	998	586	643	768	873	1515	896	530	216	1463	436	435	21	175	905	577	178	740	677	482	280	433	492	397	307	1733	430	641	249	58
ENSG00000071626	59	1433	41	364	249	139	414	262	565	214	173	285	375	236	150	55	76	592	566	1122	415	156	342	96	84	270	77	86	516	226	217	108	68
ENSG00000071655	16	230	33	149	46	78	84	76	95	107	45	105	73	15	36	1	31	140	142	137	95	85	61	53	33	34	10	33	82	50	45	80	3
ENSG00000071794	2	3	6	19	12	2	21	55	31	0	21	117	12	2	28	0	30	16	9	0	8	12	9	17	14	84	3	6	34	7	0	0	2
ENSG00000071859	3	11	37	43	54	30	49	43	51	105	16	1	38	56	38	0	3	33	2	163	40	76	83	13	28	4	31	27	72	49	4	25	14
ENSG00000071889	0	19	1	14	31	8	30	19	65	131	40	35	3	0	16	0	16	39	20	51	0	39	58	16	15	35	3	10	31	33	1	8	2
ENSG00000071894	4	94	2	25	13	3	6	23	36	4	4	44	3	61	9	0	3	10	4	2	1	25	10	10	17	3	12	0	49	3	1	3	2
ENSG00000071909	0	1	0	1	0	0	1	0	0	1	0	0	0	0	0	0	0	0	0	2	8	13	0	0	2	8	0	0	0	1	1	12	0
ENSG00000071967	4	70	8	41	7	17	32	8	8	0	1	3	0	3	12	0	0	59	0	0	2	12	9	0	6	64	2	1	3	10	0	26	1
ENSG00000071994	21	278	15	100	46	53	169	64	124	76	65	67	149	80	119	0	13	146	69	163	45	46	79	71	26	56	16	28	67	107	2	8	43
ENSG00000072041	0	0	0	3	0	8	0	0	0	0	4	0	0	0	0	0	0	8	0	0	0	1	0	1	0	0	0	0	0	2	0	0	0
ENSG00000072042	114	281	24	69	82	61	143	88	152	59	85	16	64	143	80	0	41	281	123	821	88	133	72	22	20	41	26	45	130	115	44	36	4
ENSG00000072062	68	1134	57	248	71	142	163	138	348	364	76	127	247	171	132	99	97	605	377	533	339	174	253	105	53	130	153	123	291	130	387	403	73
ENSG00000072071	80	129	17	19	42	27	0	7	43	1	11	0	4	1	3	0	10	43	25	2	29	19	3	7	6	11	7	12	44	12	2	0	1
ENSG00000072110	63	1295	197	843	177	249	171	197	608	303	204	599	273	87	168	185	98	876	323	1044	363	596	406	153	109	168	1304	363	318	182	375	1605	511
ENSG00000072121	0	181	0	53	1	14	22	50	42	0	18	2	20	53	27	0	0	53	37	1	2	30	2	3	10	2	1	13	6	16	0	24	12
ENSG00000072133	0	31	1	19	1	0	18	19	8	0	4	0	1	31	8	0	0	19	1	145	2	0	1	5	2	0	1	3	2	8	0	1	0
ENSG00000072134	50	672	8	166	124	63	174	150	126	217	64	101	53	92	85	1	10	140	276	415	80	81	115	25	30	64	37	25	143	72	4	8	1
ENSG00000072135	24	257	6	137	53	43	105	23	114	128	31	4	23	20	68	6	10	73	133	653	107	58	23	44	47	43	19	14	98	73	3	32	0
ENSG00000072163	0	0	0	2	0	0	0	0	28	0	0	0	0	0	3	0	0	0	0	17	1	0	2	0	0	0	0	0	0	0	0	0	0
ENSG00000072182	0	49	0	0	0	0	0	0	0	0	0	0	0	1	0	0	0	0	0	0	0	1	0	0	0	0	0	0	0	0	24	0	0
ENSG00000072201	0	237	10	64	51	21	38	68	90	1	26	2	95	18	41	1	1	88	88	590	24	120	14	18	13	39	2	11	34	4	5	13	1
ENSG00000072210	139	1243	57	325	253	180	458	454	389	374	153	179	277	500	398	2	60	197	473	1103	79	63	218	200	64	290	83	71	360	147	122	46	10
ENSG00000072274	64	112	25	178	13	66	69	51	215	253	101	114	47	8	35	0	41	152	86	750	110	48	30	68	75	57	68	44	53	53	122	86	15
ENSG00000072310	68	754	6	245	154	87	242	100	136	46	61	104	134	190	58	9	22	218	127	566	180	104	185	27	58	91	107	20	271	85	223	55	36
ENSG00000072364	157	1014	32	544	207	177	200	323	288	408	178	281	220	167	191	51	52	349	490	1213	148	376	69	119	132	135	170	117	334	176	6	188	65
ENSG00000072401	29	661	9	180	87	124	186	157	186	198	71	82	258	71	80	29	12	138	269	127	75	123	107	92	122	92	447	162	294	104	184	183	151
ENSG00000072415	17	580	16	51	126	74	105	76	234	105	87	32	99	161	95	23	28	160	115	526	119	118	112	91	51	40	21	71	96	41	115	2	7
ENSG00000072422	1	56	0	84	2	9	30	26	26	1	11	1	16	33	31	4	0	24	36	0	3	0	1	6	2	21	13	10	3	19	0	1	1
ENSG00000072501	96	489	98	253	154	104	203	104	396	52	173	107	67	164	172	15	27	206	202	668	58	124	109	70	44	52	98	147	57	126	63	39	7
ENSG00000072506	2	276	19	24	47	22	32	63	92	4	16	0	55	67	17	0	1	47	46	440	51	5	32	20	28	37	2	66	50	28	1	8	9
ENSG00000072518	95	1238	73	224	163	155	286	248	429	59	162	306	214	145	181	35	47	343	176	1302	186	219	274	90	85	175	123	95	348	243	215	180	40
ENSG00000072571	1	51	11	1	2	0	23	0	0	0	13	0	0	0	2	0	1	6	20	73	0	23	0	5	0	1	2	2	0	0	1	6	1
ENSG00000072609	18	1	1	110	10	60	27	23	45	82	20	3	51	78	21	2	0	99	67	257	39	69	38	7	19	13	39	14	100	46	33	39	13
ENSG00000072657	0	0	0	0	0	2	0	0	0	0	4	0	6	0	0	4	18	25	30	0	29	47	0	3	4	7	4	12	17	14	0	0	0
ENSG00000072682	24	270	31	167	61	47	110	147	198	138	11	129	37	89	80	22	19	156	317	899	79	88	104	45	16	77	39	51	126	66	129	47	3
ENSG00000072694	11	0	0	15	0	4	1	1	12	0	4	0	9	0	0	0	0	0	1	1	5	10	0	7	11	0	24	2	0	11	0	27	19
ENSG00000072736	14	1	1	67	37	15	28	48	39	3	13	0	28	1	36	0	75	55	16	2	37	37	6	16	1	44	25	12	57	24	1	1	4
ENSG00000072756	13	27	22	32	31	5	16	6	11	128	30	35	3	30	16	6	0	21	32	293	1	5	32	26	8	96	7	6	13	33	2	13	1
ENSG00000072778	8	873	18	138	160	23	165	109	135	298	110	33	110	80	56	12	25	96	92	282	138	108	71	54	54	63	83	56	90	73	52	51	40
ENSG00000072786	24	94	50	133	77	72	14	78	22	0	91	17	74	0	20	22	5	61	32	202	53	364	25	50	65	31	325	150	24	26	4	178	98
ENSG00000072803	69	140	32	115	28	31	57	49	91	36	50	28	55	61	39	6	40	41	93	677	51	37	109	19	36	44	30	18	60	50	5	15	18
ENSG00000072818	1	27	5	45	2	6	0	7	2	11	1	0	8	0	3	0	22	7	1	0	21	39	0	7	16	8	30	16	10	14	0	52	5
ENSG00000072840	0	0	0	0	0	0	0	0	0	3	19	0	26	0	0	0	0	4	10	0	0	1	0	0	0	0	0	0	0	3	0	0	0
ENSG00000072849	31	85	16	64	34	57	73	54	220	137	81	1	51	32	38	1	18	134	90	43	93	14	51	26	36	51	47	60	142	50	1	19	14
ENSG00000072858	0	173	0	49	16	2	0	20	38	75	18	0	5	0	3	0	8	22	13	0	0	0	3	2	0	17	2	13	30	13	1	2	2
ENSG00000072864	31	40	18	152	43	39	21	37	36	260	53	75	24	52	35	8	1	29	6	87	52	93	9	26	15	7	84	6	41	31	3	65	2
ENSG00000072952	3	6	23	101	34	26	0	1	29	50	23	27	6	1	1	39	33	26	2	1	21	115	2	30	17	11	358	65	28	20	40	101	95
ENSG00000072954	11	198	1	22	43	18	66	7	44	22	8	1	59	104	24	0	9	79	73	313	37	4	39	16	0	39	4	19	30	10	3	1	1
ENSG00000072958	1	40	16	53	18	21	28	70	48	0	36	1	18	5	8	14	7	42	45	2	5	7	3	8	5	31	38	36	22	35	37	23	6
ENSG00000073008	16	156	0	51	17	3	19	0	52	0	23	1	43	0	3	0	1	32	14	1	5	4	1	12	1	11	38	7	65	27	3	3	2
ENSG00000073050	0	35	0	21	9	0	2	27	0	4	0	0	0	0	13	0	0	4	16	9	0	0	14	0	0	8	25	0	10	2	1	0	0
ENSG00000073060	0	0	18	12	6	2	7	2	35	0	2	34	0	93	11	0	0	16	29	1	2	2	8	14	6	1	0	0	2	17	3	0	2
ENSG00000073067	0	0	0	23	0	0	0	0	0	0	7	0	0	0	7	0	0	1	0	0	0	0	1	0	0	0	0	0	0	0	1	0	0
ENSG00000073111	42	101	3	45	16	11	8	23	24	1	14	0	21	21	28	0	0	45	38	1	11	11	16	11	9	3	9	5	27	7	3	5	0
ENSG00000073150	1	117	22	100	28	27	53	20	42	127	7	15	27	56	18	24	12	20	134	435	31	14	66	13	12	24	79	11	47	30	15	64	14
ENSG00000073169	0	112	1	0	23	11	8	30	52	15	23	57	5	1	9	0	0	3	1	1	0	1	13	4	0	0	4	8	16	10	0	4	1
ENSG00000073282	0	1	0	14	43	8	8	0	43	1	74	0	5	0	33	1	0	48	0	0	14	8	15	2	1	22	0	12	14	0	1	0	1
ENSG00000073331	7	213	42	397	74	98	118	61	42	103	83	4	84	36	52	28	12	202	99	30	111	119	59	61	29	25	213	72	52	64	34	61	88
ENSG00000073350	102	1873	40	707	428	187	498	395	410	791	235	350	290	433	229	22	86	479	502	1820	446	100	508	153	112	228	114	107	701	171	275	124	45
ENSG00000073417	0	121	0	64	31	6	61	47	57	0	12	55	31	16	24	0	30	45	44	26	20	2	17	8	21	28	2	33	84	9	0	44	3
ENSG00000073464	50	67	0	41	2	8	10	3	13	155	0	18	13	0	2	0	0	7	32	0	1	1	3	1	10	0	5	0	22	1	0	11	3
ENSG00000073536	1	0	2	0	14	0	3	2	22	0	2	0	10	0	0	0	1	8	0	0	1	0	0	0	0	0	0	0	2	7	63	0	0
ENSG00000073578	30	447	21	73	65	39	103	108	104	311	62	178	85	49	84	0	33	230	127	144	137	28	67	45	33	75	29	28	91	18	5	17	8
ENSG00000073584	62	555	22	101	75	66	132	82	135	195	89	11	101	54	68	16	56	202	282	478	55	118	34	45	61	77	14	36	108	49	98	21	33
ENSG00000073605	16	72	0	97	9	16	30	74	66	76	5	3	38	77	52	0	27	55	44	267	55	8	61	38	15	22	2	2	28	14	3	3	2
ENSG00000073614	64	1305	90	689	312	233	326	281	458	368	363	219	248	534	217	56	36	370	166	575	209	435	109	157	125	194	421	194	412	303	295	344	93
ENSG00000073711	32	108	3	90	45	38	56	42	50	43	76	82	74	10	34	6	2	89	56	1	56	18	68	12	5	48	9	49	119	14	1	2	40
ENSG00000073712	8	91	0	56	12	26	17	30	28	4	13	4	13	0	26	3	2	104	44	135	18	1	73	11	7	40	4	13	32	17	61	0	9
ENSG00000073734	15	0	0	0	6	0	2	0	0	0	0	0	0	0	1	0	0	0	5	1	0	0	0	0	0	0	0	11	0	0	0	0	0
ENSG00000073737	154	2724	159	534	626	340	554	843	943	409	523	183	1021	448	263	109	108	370	1160	3637	509	424	443	179	421	505	137	227	527	441	471	58	41
ENSG00000073756	473	1043	583	2145	350	767	133	406	818	245	432	2065	253	8	54	606	96	412	354	291	636	2343	157	716	462	158	1915	1519	103	680	1409	5312	1106
ENSG00000073792	46	150	0	143	48	16	76	77	99	2	38	1	38	71	34	1	1	163	69	389	41	45	35	24	2	26	20	55	118	25	4	47	1
ENSG00000073803	43	1071	21	372	107	85	322	278	181	366	183	242	196	232	114	7	65	396	204	1732	172	341	99	119	92	74	111	113	316	180	74	133	29
ENSG00000073849	106	3557	34	340	630	216	400	493	634	857	289	311	348	432	495	5	54	863	878	975	344	210	441	129	132	599	63	125	601	130	105	55	15
ENSG00000073861	0	0	0	0	0	3	11	0	0	1	4	0	0	0	0	0	0	0	0	0	0	0	0	1	4	0	0	0	0	8	0	0	0
ENSG00000073910	11	20	16	34	40	14	38	8	25	7	30	7	10	0	12	32	1	12	105	32	50	61	0	17	10	13	78	23	5	11	33	71	28
ENSG00000073921	163	1655	79	665	336	298	335	272	483	531	285	455	314	380	231	160	134	717	850	1738	444	983	172	241	207	248	1288	327	508	260	318	979	305
ENSG00000073969	9	438	8	89	132	63	96	80	128	205	55	66	63	200	40	0	6	136	248	422	93	58	168	31	41	107	26	11	173	54	25	29	18
ENSG00000074047	0	48	3	0	0	3	14	38	1	0	0	0	0	27	0	11	0	0	19	0	11	0	1	4	12	0	0	0	1	26	0	1	0
ENSG00000074054	2	357	27	90	44	37	115	109	69	46	35	45	11	135	41	12	3	76	99	675	41	40	84	39	19	81	19	37	126	39	4	38	37
ENSG00000074071	65	244	28	62	42	48	50	80	119	80	84	19	46	149	70	7	7	90	42	97	44	40	48	25	12	78	2	45	130	78	10	24	5
ENSG00000074181	24	194	0	3	15	3	31	11	18	1	22	0	41	40	5	0	3	57	53	1	32	6	13	1	0	10	1	20	46	8	1	0	3
ENSG00000074201	88	866	25	456	115	88	325	217	318	443	139	277	271	188	182	1	42	433	499	1168	188	42	249	135	139	278	33	155	358	203	31	31	93
ENSG00000074211	0	113	0	8	12	1	42	19	0	1	8	0	54	0	0	0	8	5	79	0	0	29	42	2	2	1	7	0	12	13	1	1	0
ENSG00000074219	2	82	0	1	0	0	0	0	44	1	8	1	3	0	5	0	1	50	2	0	2	0	1	0	4	10	0	13	23	0	2	1	0
ENSG00000074266	12	65	6	79	12	43	93	138	49	2	87	3	60	2	41	0	49	86	69	4	67	88	17	29	6	40	46	16	54	64	3	20	1
ENSG00000074319	48	818	27	249	114	90	150	188	117	361	121	195	213	166	78	7	23	178	196	654	83	162	53	83	78	138	91	91	97	89	240	123	5
ENSG00000074356	22	482	50	292	80	64	114	161	231	1	79	3	27	233	88	21	25	96	207	781	9	16	85	74	14	100	23	47	91	86	45	34	3
ENSG00000074370	58	685	29	231	99	65	108	138	136	16	70	175	130	138	55	13	47	91	178	15	102	226	16	52	29	38	66	53	84	49	108	113	125
ENSG00000074410	60	514	5	209	40	68	202	56	314	250	134	169	119	174	140	3	3	688	333	667	99	67	153	84	40	182	11	107	204	101	48	29	1
ENSG00000074416	37	347	34	235	100	69	112	105	111	94	88	85	44	190	94	5	4	276	131	2	118	104	47	63	33	155	20	12	87	42	9	19	24
ENSG00000074527	33	631	2	93	39	41	90	60	99	196	11	23	76	110	67	1	10	49	103	307	47	84	76	19	22	74	43	16	88	44	23	3	0
ENSG00000074582	0	41	0	37	11	1	27	21	15	0	10	1	1	0	2	1	0	56	0	107	3	0	2	8	5	20	1	13	0	1	1	0	1
ENSG00000074590	83	100	7	224	25	54	66	72	133	40	26	41	26	92	10	0	2	127	26	0	4	22	15	13	31	45	20	30	95	31	3	11	2
ENSG00000074603	57	459	2	120	84	58	84	122	69	132	83	85	100	180	81	0	3	157	243	674	72	20	97	51	43	86	31	42	235	66	5	55	5
ENSG00000074621	8	35	0	11	15	15	39	4	17	95	20	0	9	1	15	0	34	17	1	165	7	12	26	9	6	10	2	11	32	21	2	2	0
ENSG00000074657	0	0	27	2	20	52	3	78	66	1	41	0	11	88	17	0	7	80	45	1	25	3	47	28	12	30	1	2	21	16	84	15	1
ENSG00000074660	1	88	0	35	10	14	0	20	10	3	5	60	9	0	9	0	0	21	27	0	4	92	0	4	54	0	154	18	20	19	47	170	105
ENSG00000074695	46	658	10	258	137	77	306	238	226	404	193	82	288	332	174	7	45	408	602	1580	159	121	180	64	89	168	79	73	230	88	136	20	6
ENSG00000074696	42	828	40	229	99	86	230	101	131	523	96	13	151	77	156	12	31	196	342	687	93	67	99	55	39	130	31	41	221	64	94	31	9
ENSG00000074706	22	102	1	24	19	11	1	27	31	45	3	68	0	0	21	0	0	3	51	1	16	1	3	18	8	18	23	31	28	23	124	23	36
ENSG00000074755	46	494	0	245	99	64	74	98	18	448	76	98	22	33	25	16	41	101	133	490	47	48	72	21	15	22	81	46	140	54	6	77	15
ENSG00000074800	133	2087	207	663	388	314	540	470	944	464	1003	327	433	763	508	8	108	1338	1051	2719	742	781	979	294	123	599	566	417	1010	393	780	453	93
ENSG00000074842	70	725	10	102	85	87	96	82	133	295	43	75	96	111	29	20	4	214	98	347	217	113	67	24	36	64	27	51	143	50	93	21	4
ENSG00000074855	6	324	11	64	110	29	70	68	76	18	23	49	17	0	8	0	3	90	100	195	40	146	28	17	6	66	32	10	67	21	1	3	41
ENSG00000074935	0	64	0	12	7	14	8	3	2	0	8	2	11	0	22	5	0	48	56	0	0	0	32	3	8	14	0	0	13	14	30	0	1
ENSG00000074964	28	517	16	71	70	51	61	91	153	181	61	36	113	258	91	6	22	190	177	488	108	96	145	15	35	74	18	28	103	41	6	41	21
ENSG00000074966	0	1	0	13	0	3	0	0	0	0	0	0	0	0	0	0	0	1	0	0	0	0	0	4	6	0	0	0	0	0	0	0	0
ENSG00000075089	21	98	0	178	61	39	105	17	97	36	24	65	117	39	25	0	2	51	5	98	54	56	63	36	16	47	13	59	52	85	20	19	1
ENSG00000075131	0	93	1	22	6	0	20	45	24	0	3	0	1	0	12	0	1	14	31	0	29	1	1	5	2	17	7	1	2	0	0	0	1
ENSG00000075142	37	273	32	332	184	83	465	238	277	398	129	335	235	175	212	15	42	399	755	942	231	119	117	175	72	118	55	57	243	100	96	20	19
ENSG00000075151	96	542	65	596	266	113	162	264	136	380	120	298	181	164	133	2	84	229	228	523	207	92	47	59	59	95	149	136	341	153	119	72	27
ENSG00000075188	2	97	1	13	36	13	58	46	11	98	14	2	50	93	27	0	1	41	107	36	19	8	38	13	10	37	6	10	28	31	0	6	1
ENSG00000075213	35	234	46	145	50	25	110	98	121	13	147	67	61	28	57	0	12	211	41	22	47	17	3	33	19	25	16	102	79	32	1	19	1
ENSG00000075218	0	1	2	0	1	0	0	0	0	0	8	0	9	0	1	0	2	10	0	0	2	0	1	1	0	0	7	0	0	1	0	14	0
ENSG00000075223	54	974	11	261	81	83	258	169	334	390	58	6	65	22	101	0	44	308	282	689	147	34	109	87	61	106	26	131	168	113	9	19	4
ENSG00000075234	0	14	0	15	16	3	2	0	0	1	5	18	1	13	10	0	0	10	9	0	35	47	27	4	4	21	2	2	19	8	0	1	1
ENSG00000075239	26	37	25	97	30	15	31	82	85	52	31	91	32	102	27	6	2	96	43	164	11	29	48	20	25	24	4	24	12	32	74	6	33
ENSG00000075240	7	1	0	0	8	5	3	5	8	1	1	42	3	39	24	0	0	9	33	1	4	16	6	4	3	6	0	1	27	2	0	0	1
ENSG00000075275	1	330	2	74	46	18	70	136	39	0	4	64	1	19	38	0	0	81	92	838	57	39	20	12	11	54	3	15	31	18	4	9	2
ENSG00000075292	69	946	61	464	282	147	323	428	466	280	246	392	209	236	240	13	42	360	194	385	99	73	118	112	102	259	106	116	339	198	151	104	34
ENSG00000075303	0	129	0	48	6	4	13	1	32	0	9	71	28	50	6	0	0	24	29	2	0	22	0	12	3	32	6	0	33	7	0	0	1
ENSG00000075336	9	120	0	55	22	9	29	2	20	27	9	25	8	0	35	4	10	22	0	5	9	2	16	4	12	3	1	0	20	9	0	36	56
ENSG00000075391	56	147	33	148	99	55	93	52	82	116	76	26	75	29	58	15	3	153	35	314	66	102	37	27	16	76	22	59	163	49	4	18	24
ENSG00000075399	48	29	33	10	32	12	35	21	19	23	17	1	26	2	11	1	0	33	0	1	26	27	1	2	19	32	77	30	38	36	52	27	34
ENSG00000075407	9	312	1	128	39	57	94	31	92	72	30	77	71	57	36	0	69	54	46	559	23	26	1	12	28	38	2	16	64	23	3	1	3
ENSG00000075413	27	785	43	247	216	87	301	172	242	398	219	303	151	206	90	7	5	367	279	1083	258	201	198	70	59	119	128	146	328	101	84	103	28
ENSG00000075415	138	1611	54	376	173	173	343	277	544	465	260	306	292	429	191	24	29	511	393	556	282	174	231	131	114	313	131	150	360	163	247	131	11
ENSG00000075420	103	1023	58	326	90	118	105	149	346	239	91	121	137	136	76	6	38	295	320	433	165	228	128	58	130	48	405	140	320	113	97	133	154
ENSG00000075426	152	2252	148	786	380	326	398	191	564	870	221	400	477	332	232	76	189	454	352	698	639	642	523	268	262	216	897	338	973	294	462	780	317
ENSG00000075539	48	516	32	237	160	87	127	173	92	101	44	140	150	129	107	8	26	226	153	335	87	196	68	33	31	64	132	44	154	135	24	51	7
ENSG00000075568	101	561	5	193	104	57	95	97	101	256	22	63	33	19	81	11	54	214	270	813	52	83	80	13	32	53	36	45	80	104	34	28	1
ENSG00000075618	40	401	1	38	48	76	46	3	296	42	146	90	64	133	118	1	1	393	2	273	14	110	102	24	4	80	22	39	101	14	78	63	1
ENSG00000075624	186	3124	268	802	398	394	348	354	783	568	466	768	452	573	289	300	142	775	698	2349	526	1570	363	317	356	348	1852	756	581	435	500	1526	639
ENSG00000075643	15	483	10	129	42	82	191	73	168	345	38	87	57	76	48	9	1	73	111	348	14	5	47	19	25	104	9	63	61	43	4	3	38
ENSG00000075651	21	276	1	61	44	34	53	182	81	158	22	1	45	77	47	5	3	41	90	323	4	60	70	16	13	18	19	6	40	26	4	27	0
ENSG00000075673	54	2176	19	200	329	69	217	129	130	277	282	70	209	58	73	36	14	162	403	1357	297	297	77	60	161	317	81	65	159	171	99	13	30
ENSG00000075711	48	1305	104	560	379	182	184	357	447	707	253	201	245	320	194	10	54	459	495	887	253	352	242	136	90	295	61	190	469	227	35	70	82
ENSG00000075785	155	2061	149	917	347	255	532	482	505	706	227	306	332	381	254	64	83	608	724	1865	386	570	190	279	196	235	631	364	524	333	763	751	95
ENSG00000075790	18	1050	22	214	137	82	127	277	304	225	121	53	213	135	80	4	48	141	175	4	121	32	118	61	112	128	87	56	288	89	31	38	18
ENSG00000075826	1	1	1	24	6	4	19	23	12	0	10	0	6	0	5	0	0	10	42	0	75	18	25	6	3	1	1	0	0	2	0	1	0
ENSG00000075856	17	248	2	96	66	38	141	101	48	5	63	33	22	4	25	0	2	135	115	378	66	52	6	30	18	33	32	19	132	58	45	32	2
ENSG00000075884	21	133	47	85	4	12	9	8	0	34	12	99	0	1	8	1	0	4	1	1	2	70	1	17	20	3	297	20	0	27	1	70	30
ENSG00000075914	6	142	0	55	38	23	19	58	101	44	71	114	79	10	42	1	1	108	133	1	52	0	58	16	3	36	1	5	81	21	4	6	3
ENSG00000075945	1	0	9	58	12	16	35	9	73	227	6	10	11	40	40	0	0	36	16	0	34	5	8	8	32	27	3	7	18	16	1	18	0
ENSG00000075975	0	132	6	21	16	12	21	31	7	56	31	0	38	1	30	0	1	50	59	60	26	2	3	19	7	16	7	30	2	8	100	2	10
ENSG00000076003	1	12	0	26	3	8	12	0	28	45	8	0	18	0	6	0	2	45	0	7	3	4	2	2	0	25	8	5	1	11	55	1	17
ENSG00000076043	53	425	21	74	92	87	151	153	77	9	83	9	90	240	71	1	36	267	218	148	50	156	77	63	24	121	25	37	160	49	5	19	1
ENSG00000076053	7	16	0	57	26	14	20	49	10	0	13	2	35	42	10	1	5	33	19	179	8	45	11	12	11	54	33	45	5	14	2	25	1
ENSG00000076067	2	0	2	82	26	37	38	33	22	20	7	1	30	48	55	10	0	78	31	135	32	55	115	14	9	28	11	1	82	38	22	0	0
ENSG00000076108	78	1065	96	518	215	174	177	204	311	131	225	247	139	363	124	54	16	229	157	1173	181	383	195	121	92	99	376	210	317	176	261	89	90
ENSG00000076201	11	181	2	66	27	21	28	54	33	46	46	43	25	58	9	1	66	53	152	1	67	111	59	35	8	14	9	6	51	16	28	14	2
ENSG00000076242	0	47	0	34	40	7	23	29	56	26	15	73	58	17	51	0	0	136	66	163	3	31	32	18	4	69	7	13	69	25	34	27	1
ENSG00000076248	1	167	7	1	23	20	20	10	85	116	26	1	64	26	32	0	3	45	72	160	26	20	6	9	5	44	17	11	31	32	3	6	0
ENSG00000076258	0	67	0	49	9	3	2	0	10	34	2	1	14	0	3	0	0	20	30	17	1	0	9	1	2	24	1	0	8	25	0	0	0
ENSG00000076321	6	628	11	38	44	14	58	77	25	8	21	20	59	61	60	0	0	156	129	331	55	28	37	18	22	45	1	5	35	17	0	9	1
ENSG00000076351	0	106	13	27	1	0	10	23	34	84	1	13	0	24	16	0	1	4	45	106	6	7	30	13	0	2	4	4	4	11	0	6	0
ENSG00000076356	47	128	1	104	37	46	48	117	83	37	18	82	1	0	81	7	0	160	71	392	9	29	80	19	2	29	14	1	19	70	1	27	22
ENSG00000076382	0	0	0	0	0	8	0	55	0	0	0	0	22	14	0	0	0	1	1	0	1	0	0	1	2	9	0	0	11	4	0	0	3
ENSG00000076513	43	814	115	500	178	182	220	257	366	366	140	71	260	77	174	39	67	285	134	599	196	308	196	78	139	149	307	206	181	168	273	165	27
ENSG00000076554	46	1085	30	176	202	152	251	140	273	88	133	241	186	79	124	1	31	336	177	938	167	130	56	71	75	152	21	48	285	127	97	33	20
ENSG00000076555	0	3	11	29	13	1	59	47	1	1	26	2	1	11	13	21	32	50	54	96	12	23	0	24	3	4	1	11	9	18	61	27	0
ENSG00000076604	102	1799	38	464	230	220	551	452	396	1533	124	194	565	356	202	28	227	712	1188	3193	679	296	568	164	140	285	72	112	853	202	272	72	48
ENSG00000076641	34	88	20	73	21	35	39	14	24	91	40	48	0	0	17	17	1	50	59	3	46	138	58	49	64	15	456	112	40	23	1	120	40
ENSG00000076650	35	42	13	30	9	17	49	5	24	53	18	1	17	67	10	0	4	57	101	81	3	46	97	8	19	27	24	17	17	34	1	8	1
ENSG00000076662	32	138	135	326	93	133	36	28	90	17	101	209	19	7	43	140	22	76	46	133	68	711	67	176	141	62	1585	415	46	114	222	1004	149
ENSG00000076685	85	2247	63	462	370	220	475	361	491	433	262	208	386	440	242	47	79	550	492	636	225	539	211	137	165	200	423	221	492	207	90	204	56
ENSG00000076706	4	2	0	8	6	8	2	3	45	1	68	7	5	7	22	8	15	48	0	190	8	37	38	2	0	1	0	9	1	9	21	8	58
ENSG00000076716	0	222	1	12	1	6	23	0	22	62	0	3	0	0	18	0	1	80	36	168	22	0	44	5	1	16	4	2	9	19	1	2	0
ENSG00000076770	29	98	0	37	21	0	32	9	75	0	25	0	0	10	14	1	0	18	1	2	3	16	4	5	17	38	2	11	44	25	1	0	0
ENSG00000076826	1	183	2	46	17	14	20	47	23	19	8	47	39	11	16	0	30	4	99	270	97	10	1	8	9	21	2	13	56	9	38	2	1
ENSG00000076864	1	183	1	35	40	8	42	62	116	37	10	2	20	134	13	0	15	95	199	319	66	3	37	22	3	34	2	0	53	41	1	2	3
ENSG00000076928	1	33	3	102	32	36	18	52	19	4	5	0	3	3	25	2	12	13	31	218	11	73	39	9	8	26	21	48	45	23	54	40	21
ENSG00000076944	8	4	1	8	21	6	3	18	22	0	6	11	7	0	1	0	1	36	6	0	1	6	13	5	12	2	48	6	48	5	1	16	1
ENSG00000076984	35	731	13	260	139	110	221	118	169	199	97	168	71	138	71	12	42	169	139	395	164	159	247	55	64	125	105	119	192	99	81	70	27
ENSG00000077044	23	117	14	117	35	73	51	23	44	1	3	1	22	1	7	0	2	79	47	144	70	18	2	15	14	58	40	50	66	18	0	73	90
ENSG00000077063	0	0	1	9	8	11	22	3	24	0	14	0	0	0	0	0	0	3	62	0	2	0	0	7	1	15	0	1	2	14	0	0	0
ENSG00000077092	0	180	0	23	10	26	28	48	26	141	17	137	9	129	30	1	0	8	71	107	36	29	9	20	19	30	4	4	75	39	2	3	0
ENSG00000077097	69	973	25	363	205	126	288	212	394	448	171	168	204	131	151	13	44	425	409	663	117	177	177	55	100	154	107	74	290	103	14	49	4
ENSG00000077147	342	6322	197	1371	855	591	1477	1208	1982	1448	915	919	1168	1212	951	24	187	1837	1297	4232	712	490	664	488	597	1174	300	471	1676	691	839	350	50
ENSG00000077150	0	289	14	179	45	43	6	9	70	83	30	98	32	0	10	23	5	9	49	244	37	89	4	7	18	6	382	76	47	36	130	149	85
ENSG00000077152	1	0	0	13	5	0	6	9	22	0	13	41	14	0	7	0	0	28	0	4	1	0	0	4	0	0	0	9	35	7	1	0	1
ENSG00000077157	40	260	20	209	53	37	113	79	145	37	35	73	51	110	47	31	7	172	163	81	105	54	24	35	4	51	76	69	143	56	65	65	57
ENSG00000077232	38	912	55	608	193	37	446	408	315	668	171	285	269	165	181	3	46	292	675	1824	192	162	62	75	126	349	71	142	312	197	13	26	51
ENSG00000077235	8	905	20	237	143	99	173	120	194	175	71	238	121	149	96	6	56	238	403	1424	168	125	145	65	57	77	49	84	169	122	31	24	16
ENSG00000077238	60	1540	104	525	238	268	276	105	417	293	243	323	210	91	131	74	55	369	183	27	424	630	257	159	183	184	1163	332	320	186	260	938	287
ENSG00000077254	94	907	73	356	192	128	235	294	216	122	151	82	198	29	162	5	36	155	62	445	107	147	97	95	92	153	234	151	266	147	39	105	6
ENSG00000077264	0	0	0	0	2	1	1	1	0	0	0	0	0	0	0	8	13	8	0	172	0	26	1	0	0	0	0	11	0	0	0	12	0
ENSG00000077312	36	473	27	74	53	31	72	34	106	158	64	10	85	0	61	1	28	94	123	707	117	168	49	30	22	85	65	54	43	70	6	19	1
ENSG00000077327	9	1	4	461	9	16	129	234	32	81	1	67	0	0	92	0	0	32	110	322	96	1	30	25	1	35	3	50	3	85	6	2	5
ENSG00000077348	2	0	3	0	1	2	9	12	12	0	4	0	38	0	0	0	1	8	36	0	0	0	0	0	4	8	0	2	1	3	0	12	0
ENSG00000077380	53	697	36	217	128	73	197	224	238	241	154	60	192	94	96	21	38	460	488	1110	219	129	180	124	123	126	38	87	146	137	50	39	15
ENSG00000077420	2	4	41	285	10	57	10	0	24	2	52	66	16	1	12	8	1	33	2	1	44	337	9	29	28	21	350	95	33	29	63	222	80
ENSG00000077454	1	0	0	0	21	3	0	0	12	0	3	0	0	57	4	0	0	0	0	66	0	38	1	0	8	17	35	0	28	7	0	16	1
ENSG00000077458	0	386	10	146	55	62	90	34	89	56	56	124	80	28	60	9	27	153	113	526	54	93	23	17	33	19	29	21	102	49	6	37	18
ENSG00000077463	1	426	15	114	46	58	77	36	59	93	35	59	19	1	21	0	4	107	59	191	45	61	59	11	32	34	33	18	56	15	1	55	29
ENSG00000077498	0	1	0	0	1	0	0	0	0	0	0	0	9	0	0	0	1	1	0	1	0	0	0	0	0	0	0	0	0	0	0	0	24
ENSG00000077514	7	241	21	192	58	42	127	149	82	94	57	49	54	155	81	1	9	90	101	121	26	37	3	22	33	11	21	10	98	96	1	32	4
ENSG00000077549	205	3084	85	558	392	153	454	305	563	516	273	362	594	406	257	82	158	726	508	2068	428	481	275	183	192	380	532	201	612	214	110	476	195
ENSG00000077585	4	241	0	36	3	11	20	7	33	25	16	0	0	9	28	0	0	69	33	139	30	1	1	26	7	15	4	1	12	0	1	2	1
ENSG00000077684	9	3	8	198	32	40	37	70	90	89	28	35	51	38	30	1	37	72	70	452	34	48	27	38	3	38	29	89	24	33	9	85	63
ENSG00000077713	0	0	0	0	0	0	2	0	22	0	0	0	0	0	14	0	0	0	1	0	9	0	15	1	1	1	0	0	0	11	0	0	0
ENSG00000077721	43	535	2	84	91	59	124	141	100	172	59	84	122	76	70	0	34	106	119	654	57	104	100	75	58	98	103	111	136	82	239	59	3
ENSG00000077782	7	14	3	73	5	21	14	4	71	1	2	8	0	1	36	0	1	71	81	2	6	37	21	3	2	35	1	2	12	3	2	3	0
ENSG00000077935	0	0	0	0	0	0	0	0	0	0	1	1	0	0	0	0	0	3	0	1	0	0	0	0	6	0	0	0	1	1	0	18	0
ENSG00000077942	7	202	15	27	38	54	88	56	154	186	13	19	12	107	45	0	14	79	124	46	80	1	39	25	6	45	16	35	92	13	0	19	1
ENSG00000077943	0	0	0	0	0	0	0	0	0	0	0	0	0	0	0	0	0	14	1	0	0	0	0	0	0	1	1	0	1	1	8	0	17
ENSG00000077984	2	0	79	142	12	14	0	5	0	4	28	2	4	1	6	5	0	0	0	4	4	34	2	18	52	11	300	64	2	9	17	54	13
ENSG00000078018	0	138	20	60	93	32	44	19	61	4	24	9	36	27	18	0	0	41	4	3	7	77	2	17	11	22	12	86	14	14	1	6	1
ENSG00000078043	0	307	20	104	103	36	121	91	85	128	51	6	61	33	81	5	2	146	138	243	43	46	38	54	22	37	17	39	180	36	30	19	21
ENSG00000078061	4	56	4	63	56	13	39	31	76	131	34	1	12	1	20	0	0	37	114	242	42	26	22	22	5	26	29	2	38	63	1	42	2
ENSG00000078070	0	122	3	65	29	18	36	52	38	70	22	40	18	0	10	1	0	82	38	5	26	20	27	2	6	47	12	6	49	29	51	23	3
ENSG00000078081	0	0	17	0	1	3	6	41	1	0	6	0	26	0	7	0	0	2	50	0	0	0	0	1	0	0	0	1	0	5	0	0	0
ENSG00000078098	0	0	0	0	0	5	0	0	22	1	0	0	0	0	0	11	0	20	0	0	1	0	0	0	0	0	0	2	21	0	0	0	0
ENSG00000078114	59	1650	38	600	292	165	577	342	452	503	107	421	240	496	221	3	41	596	336	2125	289	115	141	163	156	216	27	154	567	202	190	44	18
ENSG00000078124	1	23	3	39	50	28	88	32	40	29	28	8	38	130	45	0	5	78	60	50	11	2	79	27	18	54	30	10	38	35	2	39	20
ENSG00000078140	93	1373	30	357	243	132	280	272	425	168	125	194	301	237	148	4	9	425	412	1494	129	174	139	102	41	129	116	161	279	150	100	97	9
ENSG00000078142	1	305	20	247	145	52	149	165	203	62	67	161	99	67	73	8	26	180	72	173	72	83	60	28	64	93	86	23	139	58	4	36	63
ENSG00000078177	50	245	37	138	32	30	83	109	52	164	43	85	14	93	52	15	1	111	69	198	65	43	6	44	14	73	17	33	155	32	84	81	2
ENSG00000078237	25	283	7	57	21	55	119	61	65	14	16	0	28	55	10	19	0	38	21	133	0	32	5	27	25	0	11	23	161	26	0	3	0
ENSG00000078246	1	92	1	157	45	41	42	33	24	91	31	84	44	52	36	0	32	49	91	81	10	62	30	17	16	14	16	36	40	24	38	6	2
ENSG00000078269	42	278	35	122	84	62	102	238	175	112	72	9	137	115	107	3	10	225	199	1204	105	97	131	73	16	87	32	51	178	78	14	48	3
ENSG00000078295	1	87	11	61	3	12	28	27	13	30	3	2	1	1	44	3	0	19	143	269	35	1	31	9	3	0	2	3	60	13	2	3	4
ENSG00000078304	70	1693	48	574	189	158	438	273	488	192	223	222	311	320	233	30	29	508	501	437	191	204	197	97	157	328	286	143	288	171	48	240	28
ENSG00000078319	0	0	0	1	6	0	0	0	32	0	3	0	0	0	1	0	0	12	8	27	0	0	0	0	0	1	0	0	3	6	0	0	0
ENSG00000078369	100	1270	65	585	189	224	339	219	400	232	205	380	260	299	127	48	38	331	430	315	237	374	200	109	100	199	304	175	456	264	248	263	90
ENSG00000078399	0	0	0	25	0	0	8	0	1	0	0	0	0	0	0	0	0	0	0	0	0	0	0	1	0	0	0	0	0	0	0	0	0
ENSG00000078401	1	1	0	37	12	21	0	26	33	0	25	11	22	0	6	20	1	11	40	0	0	15	12	14	28	3	53	7	1	4	0	86	54
ENSG00000078403	1	469	0	122	47	39	62	82	22	13	52	1	44	0	11	2	8	27	75	444	27	9	64	13	12	30	13	13	66	38	3	20	12
ENSG00000078487	0	25	9	184	16	14	66	48	15	35	0	1	15	0	45	0	13	44	89	388	29	25	11	10	5	18	3	35	11	17	72	5	7
ENSG00000078579	0	0	0	0	0	1	0	0	0	0	0	0	1	0	8	0	0	7	14	0	0	0	0	3	0	0	0	0	0	0	0	0	0
ENSG00000078596	3	1	0	0	2	0	0	1	19	2	2	0	32	0	3	0	0	49	0	2	3	0	1	3	6	8	0	1	1	14	2	0	0
ENSG00000078618	36	564	148	355	110	119	241	94	137	28	115	309	142	114	84	18	45	197	95	186	80	167	112	95	103	145	268	298	215	146	81	111	11
ENSG00000078668	47	35	12	140	55	50	223	241	136	656	153	149	43	62	149	16	2	158	296	683	105	38	52	66	50	79	41	35	147	107	6	97	7
ENSG00000078674	99	1709	95	1374	252	190	827	733	542	897	319	447	278	229	467	22	98	488	380	3680	487	193	333	234	131	306	68	330	413	479	123	129	17
ENSG00000078687	10	334	1	188	44	71	96	29	77	168	41	2	31	56	56	0	59	94	117	10	44	9	60	28	26	50	75	55	145	26	55	32	88
ENSG00000078699	39	284	17	35	36	16	52	42	65	151	53	7	49	24	12	0	45	52	41	0	74	27	2	12	3	10	9	21	44	28	39	16	1
ENSG00000078725	0	1	0	0	7	4	0	0	0	0	0	0	1	0	0	0	0	3	0	0	1	0	5	0	0	0	2	11	1	0	0	0	0
ENSG00000078747	15	227	58	152	82	44	115	144	97	8	20	1	81	57	39	3	10	86	145	686	21	30	39	27	45	65	62	26	142	61	41	35	13
ENSG00000078804	30	588	70	343	326	78	122	147	176	182	93	441	84	176	48	23	108	163	223	102	205	251	76	45	67	70	164	127	246	69	311	178	59
ENSG00000078808	147	4164	67	474	375	430	767	580	974	842	302	698	633	802	452	23	125	959	815	2545	595	332	322	269	292	508	352	289	1010	581	573	287	58
ENSG00000078814	0	1	1	7	0	0	0	0	0	0	0	0	0	0	7	0	0	0	0	1	1	0	1	0	0	0	5	1	1	0	0	0	0
ENSG00000078898	1	29	0	0	1	0	5	1	0	0	1	0	8	1	0	0	1	3	15	335	1	0	0	2	0	1	12	0	0	4	2	0	0
ENSG00000078900	20	0	4	215	6	9	92	74	6	0	1	38	0	0	44	0	9	4	76	282	45	2	0	10	0	12	0	12	1	27	1	1	0
ENSG00000078902	42	561	42	167	72	75	170	92	226	61	135	206	150	150	84	11	37	261	320	190	194	218	244	72	31	135	42	63	231	143	190	76	82
ENSG00000078967	0	97	0	11	18	14	8	14	19	2	4	0	4	66	19	0	1	11	48	160	3	1	6	2	4	7	1	0	2	8	1	0	2
ENSG00000079102	0	72	0	0	0	6	0	0	0	0	0	0	0	0	0	0	0	17	0	1	0	17	0	0	0	1	0	0	0	5	26	0	16
ENSG00000079112	0	0	0	0	0	0	4	0	8	0	0	0	0	0	0	0	0	23	0	0	15	0	1	1	0	0	0	5	0	0	0	0	0
ENSG00000079134	1	297	8	77	16	28	54	23	11	44	90	1	53	0	28	0	2	87	59	425	44	39	61	29	6	31	1	21	112	36	5	44	3
ENSG00000079156	0	1	0	40	16	7	50	80	1	2	11	41	4	0	19	0	1	54	54	52	2	26	0	16	0	10	1	4	50	14	2	1	16
ENSG00000079215	2	0	2	0	5	5	4	0	7	62	5	17	9	0	14	0	0	25	0	2	1	1	2	1	1	0	24	0	0	3	0	2	0
ENSG00000079246	128	1723	65	600	277	226	388	387	559	408	429	269	365	560	309	26	83	498	652	1619	448	315	301	184	180	277	302	236	598	248	147	262	15
ENSG00000079257	0	28	1	20	0	14	47	46	5	137	9	17	39	1	22	0	0	50	36	1	16	39	1	7	15	2	3	0	1	15	2	6	0
ENSG00000079263	1	47	16	45	10	80	55	21	36	1	33	90	11	0	4	13	1	40	0	277	29	27	1	8	24	6	102	77	1	26	23	29	1
ENSG00000079277	1	130	26	116	49	34	19	53	43	0	27	14	46	83	26	0	2	48	43	162	72	108	27	32	46	49	377	68	109	35	151	172	6
ENSG00000079308	58	0	1	59	2	11	16	0	27	142	6	39	0	37	63	0	0	112	138	1	14	1	0	8	1	20	2	1	26	3	0	21	1
ENSG00000079313	9	30	4	3	0	25	16	0	46	0	0	0	6	4	5	0	2	11	41	2	41	26	0	1	2	0	5	11	42	15	6	3	0
ENSG00000079332	41	859	55	74	126	95	254	132	119	79	123	104	113	61	76	41	42	169	156	447	174	148	74	56	127	76	84	126	125	108	174	141	17
ENSG00000079335	37	1	7	58	11	7	6	26	8	161	12	0	0	0	7	0	0	12	12	27	13	17	0	6	7	0	4	7	14	44	1	15	0
ENSG00000079337	0	214	20	38	13	10	49	18	16	0	42	21	12	25	8	1	5	10	112	329	15	23	22	2	5	1	12	17	28	26	2	0	1
ENSG00000079385	22	302	14	58	51	34	61	25	57	75	46	3	52	188	19	28	34	48	66	1	69	102	107	13	26	15	24	17	46	68	23	28	108
ENSG00000079387	1	68	22	45	24	38	70	16	57	2	62	2	74	26	43	0	21	57	33	4	37	12	59	16	35	29	15	36	32	30	3	20	2
ENSG00000079432	13	145	2	70	23	23	18	78	65	19	27	18	37	61	22	8	0	101	71	1	30	39	12	22	9	32	47	12	38	56	51	66	9
ENSG00000079435	15	48	4	80	27	17	65	18	12	88	7	77	45	71	14	8	0	23	24	84	29	1	28	18	7	6	17	1	79	26	1	3	0
ENSG00000079459	72	291	41	115	66	57	156	143	99	439	75	112	130	57	122	1	15	269	300	2025	153	113	197	53	44	144	58	93	181	114	144	18	2
ENSG00000079462	1	142	1	8	1	11	2	0	18	0	1	0	5	29	9	0	1	10	0	240	9	1	0	6	0	0	18	20	29	17	1	9	0
ENSG00000079482	1	1	11	25	15	4	37	55	12	30	4	0	24	0	39	0	12	31	63	74	42	0	11	13	0	9	0	21	61	44	0	9	0
ENSG00000079616	10	96	0	41	32	33	54	26	8	0	29	59	61	8	20	0	0	49	51	2	57	6	4	12	14	46	10	10	28	47	1	15	9
ENSG00000079691	3	402	39	227	67	119	148	86	141	66	106	166	163	66	76	4	32	223	32	330	80	31	28	37	39	50	33	12	156	97	4	35	8
ENSG00000079739	14	185	0	3	23	16	41	38	64	121	31	1	31	10	21	0	3	40	84	194	26	10	10	16	6	32	16	2	48	10	20	30	1
ENSG00000079785	116	1266	25	670	253	151	446	257	537	74	431	365	397	266	193	0	52	469	273	937	197	113	124	157	98	185	64	262	263	191	144	66	31
ENSG00000079805	25	702	38	224	90	99	74	150	82	171	110	157	37	105	43	24	15	200	152	961	114	100	48	41	46	68	160	34	311	103	161	132	27
ENSG00000079819	1	17	14	0	32	16	49	11	68	1	18	86	21	1	32	0	1	54	12	0	30	0	1	9	14	16	6	24	8	2	0	0	1
ENSG00000079841	0	298	16	112	72	14	119	151	138	2	65	85	33	106	115	0	22	91	263	256	32	11	1	23	18	121	13	30	41	70	3	26	3
ENSG00000079950	25	606	6	262	79	56	60	70	104	153	65	95	150	108	39	31	22	134	175	802	67	139	15	54	52	83	126	56	182	43	59	100	55
ENSG00000079974	40	246	23	854	45	47	290	520	134	696	17	173	73	2	148	1	27	147	504	1946	204	36	19	59	25	59	23	47	46	176	11	12	4
ENSG00000079999	55	1664	46	133	114	67	148	146	202	177	56	120	222	184	107	1	66	197	266	783	166	103	131	43	61	139	41	52	217	108	151	45	6
ENSG00000080007	0	0	0	0	0	1	0	0	2	112	0	0	0	0	7	0	0	0	2	0	6	26	0	4	0	8	0	2	0	1	0	9	0
ENSG00000080031	1	114	4	80	43	29	22	30	19	1	18	17	66	0	19	22	15	17	32	154	18	0	41	13	38	12	16	18	36	12	0	1	1
ENSG00000080166	5	0	3	8	5	0	0	3	0	1	5	3	143	3	2	1	0	25	0	7	17	1	6	0	1	23	5	2	14	1	4	0	1
ENSG00000080189	1	162	2	128	54	53	69	51	84	200	28	61	60	70	65	0	9	129	118	219	93	31	67	30	50	48	16	54	99	36	20	51	2
ENSG00000080200	11	141	17	135	76	54	118	110	75	121	58	1	48	21	52	1	0	90	118	184	34	104	20	26	43	48	22	32	137	71	2	4	4
ENSG00000080298	2	143	6	454	18	46	282	300	39	508	21	70	17	2	153	0	2	122	217	1060	108	56	17	72	9	97	28	73	21	89	6	42	1
ENSG00000080345	88	1356	20	282	159	96	212	108	407	526	156	207	139	82	129	0	52	261	104	687	108	100	137	122	77	99	74	84	132	113	155	46	41
ENSG00000080371	82	486	21	185	148	82	102	88	195	90	159	72	133	23	122	20	53	263	141	514	71	362	67	78	147	80	378	111	193	90	149	193	85
ENSG00000080493	3	175	16	133	43	26	151	101	190	203	104	104	77	36	106	0	53	133	301	941	80	44	27	33	24	132	7	1	66	48	5	7	4
ENSG00000080503	94	1300	107	947	251	175	384	411	526	417	234	491	362	341	309	21	33	553	461	1840	337	246	240	211	120	330	198	281	337	253	13	122	46
ENSG00000080546	32	72	10	144	16	11	51	60	16	89	7	2	10	19	37	0	1	69	179	169	0	53	7	23	4	29	16	27	40	29	5	43	3
ENSG00000080561	1	1	0	0	16	2	5	16	0	0	0	1	0	0	4	0	0	0	33	1	0	0	0	3	0	1	4	0	0	0	0	0	0
ENSG00000080572	0	1	7	6	2	4	39	11	0	45	0	82	0	0	6	0	8	5	70	1	3	6	8	0	0	28	1	3	1	26	0	0	0
ENSG00000080573	0	0	11	0	0	0	0	0	30	124	0	0	2	0	0	0	0	0	0	0	0	0	43	0	0	0	1	1	37	0	0	0	0
ENSG00000080603	55	645	69	295	154	65	103	160	181	60	168	147	182	172	43	3	19	110	65	245	126	156	49	62	54	37	53	28	145	109	93	70	30
ENSG00000080608	32	580	30	186	71	80	180	195	222	100	215	43	153	263	120	1	3	187	258	568	121	124	28	78	63	157	16	81	197	71	62	22	1
ENSG00000080802	2	530	3	211	71	28	80	37	127	82	50	1	33	40	40	18	22	104	149	540	90	63	23	27	49	70	26	1	155	40	4	20	0
ENSG00000080815	54	630	51	150	90	148	148	199	144	149	122	264	73	77	125	26	42	212	93	25	80	133	78	69	117	142	231	97	301	109	3	171	99
ENSG00000080819	0	57	1	19	22	21	21	5	11	0	23	14	23	1	7	0	0	32	37	157	10	8	17	2	3	45	8	3	29	11	3	0	1
ENSG00000080822	4	50	1	14	25	22	14	39	23	93	17	22	24	0	15	6	1	37	67	106	36	55	37	8	14	21	24	17	51	26	0	18	38
ENSG00000080823	10	246	13	440	14	12	122	261	16	171	42	91	31	2	63	5	3	38	89	1148	64	4	68	58	6	35	18	39	46	33	5	15	3
ENSG00000080824	914	11336	846	7297	2287	1570	3277	4867	3982	3122	3454	2046	2809	2249	2498	118	442	3984	3177	15847	1988	2795	945	1345	1005	1812	1953	2700	2511	3195	596	1144	207
ENSG00000080839	1	63	13	8	2	15	17	41	40	1	22	1	38	1	3	0	1	13	9	3	21	16	12	0	4	9	7	7	8	7	0	12	1
ENSG00000080845	15	109	17	53	56	33	65	40	45	40	33	34	65	5	31	1	0	64	3	141	31	21	20	27	3	17	20	18	55	25	38	10	1
ENSG00000080947	0	0	0	18	7	0	0	0	0	0	0	0	0	0	0	0	0	0	0	0	0	0	0	1	0	0	0	0	0	0	0	0	0
ENSG00000080986	2	10	0	17	17	0	5	0	8	0	15	0	22	0	15	0	6	4	0	2	27	1	0	4	4	0	0	18	3	4	0	0	1
ENSG00000081014	3	107	0	47	33	11	29	86	97	132	34	3	15	190	15	8	20	95	24	184	36	37	19	21	4	2	21	21	45	13	1	7	11
ENSG00000081019	30	246	37	96	56	50	68	77	81	5	40	17	65	99	66	12	66	117	100	532	32	55	26	49	35	92	175	38	97	41	110	44	35
ENSG00000081026	131	1184	67	279	256	141	302	217	179	266	91	5	280	183	116	6	69	188	112	603	93	104	150	89	89	119	40	150	316	143	165	9	4
ENSG00000081041	14	411	57	89	75	39	56	65	79	139	28	362	108	0	32	42	66	96	109	183	173	188	3	90	205	27	217	47	4	162	125	322	122
ENSG00000081051	2	1	3	0	3	0	1	1	0	1	3	0	0	0	0	0	1	2	0	6	6	0	4	0	0	4	0	2	2	0	5	0	0
ENSG00000081059	3	0	0	116	23	16	31	23	2	2	4	0	23	1	29	0	3	2	36	146	10	1	0	10	6	28	1	48	16	13	0	1	2
ENSG00000081087	9	535	28	83	41	38	36	38	100	46	46	3	91	48	16	41	15	98	40	307	53	77	61	42	35	25	50	23	85	79	4	64	38
ENSG00000081138	0	0	0	0	0	0	0	0	0	0	0	0	0	0	0	0	15	0	0	0	1	0	0	0	0	0	0	0	0	4	0	0	12
ENSG00000081148	0	0	0	0	7	1	0	12	0	0	9	0	6	5	0	0	0	0	0	0	0	28	0	3	0	0	0	0	0	0	0	0	0
ENSG00000081154	28	700	15	221	110	81	111	149	208	218	147	2	120	354	149	8	31	222	196	234	84	133	63	84	19	142	65	118	229	113	5	62	6
ENSG00000081177	3	183	0	3	23	1	18	19	38	99	7	0	21	55	9	0	1	10	55	47	20	1	11	4	0	27	16	9	40	27	1	10	0
ENSG00000081181	11	103	0	44	17	19	9	20	8	0	19	32	6	29	25	0	0	26	22	117	0	55	25	15	18	40	17	6	87	14	0	22	0
ENSG00000081189	32	135	32	90	18	29	1	1	51	1	40	13	0	0	17	35	2	24	55	2	24	183	4	23	15	17	77	94	8	19	1	123	1
ENSG00000081237	127	757	595	1829	347	488	116	122	280	22	409	1311	164	50	74	415	35	369	109	546	323	1583	77	569	432	138	5108	1654	80	394	733	3006	636
ENSG00000081277	0	243	7	81	89	27	63	7	177	1	177	4	80	3	55	39	18	214	104	36	147	247	43	17	1	97	48	88	62	35	67	48	21
ENSG00000081307	0	209	3	64	32	19	96	52	45	94	27	71	77	0	72	0	2	63	86	934	4	6	1	16	9	55	7	3	54	60	177	21	0
ENSG00000081320	45	554	109	399	167	96	148	80	239	134	97	147	203	48	52	53	29	169	134	325	125	342	127	154	64	109	413	150	127	92	215	407	111
ENSG00000081377	0	52	2	95	46	30	52	38	89	28	14	237	72	67	35	12	5	79	107	472	40	3	21	19	6	9	1	18	25	26	7	2	2
ENSG00000081386	0	0	1	38	1	0	11	6	3	0	7	1	10	0	12	0	18	16	1	1	0	0	21	15	1	1	0	0	3	9	0	0	0
ENSG00000081665	23	319	0	68	17	15	55	50	57	1	30	62	13	1	8	1	14	60	21	86	9	31	7	6	7	23	27	24	81	16	1	4	2
ENSG00000081692	8	120	10	82	20	14	10	59	37	59	31	82	35	123	19	0	1	34	39	203	37	43	33	35	2	12	12	1	54	5	42	2	4
ENSG00000081721	1	9	0	22	7	7	37	16	31	6	6	2	68	58	3	0	1	64	1	214	3	21	0	3	17	11	1	14	35	12	7	8	19
ENSG00000081760	1	193	17	152	100	59	69	64	189	71	26	1	28	2	35	2	33	70	87	322	43	60	172	32	17	73	35	72	79	33	0	6	30
ENSG00000081791	22	269	0	117	75	12	59	42	104	93	27	25	40	4	20	1	25	67	68	2	68	49	47	42	16	36	31	26	46	67	3	38	2
ENSG00000081803	21	603	16	114	65	22	58	65	164	35	28	14	22	78	50	1	4	82	95	112	15	74	7	28	16	68	20	24	73	53	2	1	6
ENSG00000081870	4	192	2	74	61	34	65	102	43	255	43	109	79	37	43	0	0	60	186	430	66	54	21	26	23	54	15	34	77	37	6	9	1
ENSG00000081913	44	90	17	157	60	21	106	59	85	3	66	1	26	1	35	2	0	32	24	2	35	99	47	22	18	28	37	20	117	40	4	25	54
ENSG00000081923	52	895	23	215	183	81	216	138	247	494	100	284	143	129	123	1	82	162	291	1414	88	59	165	71	60	170	40	67	214	84	49	6	16
ENSG00000082014	0	1	6	9	1	1	0	10	20	2	3	0	0	0	1	0	0	19	0	0	16	35	0	0	6	0	23	1	0	0	0	16	3
ENSG00000082068	51	455	3	52	47	62	88	64	73	29	35	3	58	55	50	18	1	72	90	43	88	142	10	20	43	82	10	13	36	34	1	20	2
ENSG00000082074	114	266	352	930	138	293	58	91	151	36	215	411	80	36	37	130	13	135	101	696	172	798	84	250	291	83	2345	873	38	188	370	619	184
ENSG00000082146	0	0	0	44	0	15	11	50	0	50	1	0	8	44	10	0	0	2	11	0	0	0	0	1	14	4	8	7	33	21	0	0	0
ENSG00000082153	203	1089	168	325	400	237	370	269	483	234	320	468	400	365	169	34	72	394	242	452	348	489	208	179	160	234	362	179	559	227	173	242	55
ENSG00000082196	0	0	0	0	12	0	9	10	4	0	9	0	16	0	9	0	0	0	0	0	32	0	0	0	0	0	0	0	0	1	0	0	0
ENSG00000082212	4	165	1	57	40	18	18	10	87	170	43	33	14	59	45	0	10	64	53	104	22	23	32	7	17	66	28	39	12	29	1	13	23
ENSG00000082213	36	702	24	148	40	39	105	122	103	114	55	53	202	154	93	0	36	158	154	9	31	20	61	57	27	62	7	43	134	34	3	55	2
ENSG00000082258	43	673	8	99	66	53	90	143	92	168	88	158	107	140	51	0	31	97	189	330	28	34	81	42	37	116	35	15	214	75	33	24	22
ENSG00000082269	47	397	1	109	47	51	82	136	99	64	73	4	118	88	33	0	19	123	93	2	100	77	99	40	63	154	56	53	77	31	86	23	4
ENSG00000082293	0	0	0	0	0	0	0	0	0	0	3	0	0	0	0	0	33	0	0	0	0	0	0	0	0	0	0	0	0	0	0	0	24
ENSG00000082397	2	84	20	36	6	15	4	1	1	51	24	0	12	1	2	0	6	0	25	0	8	26	1	1	0	0	4	0	1	9	8	27	0
ENSG00000082438	18	326	4	157	58	93	130	107	113	405	61	43	149	47	77	0	18	172	150	563	27	59	67	49	30	131	20	67	147	72	8	24	4
ENSG00000082458	22	836	66	455	226	98	365	336	359	231	157	226	237	213	145	0	4	414	312	1164	245	204	203	122	53	242	38	143	353	163	57	44	7
ENSG00000082482	1	0	0	0	0	0	0	0	0	14	0	56	0	1	0	0	2	10	65	65	0	0	0	9	1	1	0	1	1	10	0	0	0
ENSG00000082497	4	607	2	221	89	4	139	117	171	174	78	7	89	77	109	14	5	272	258	204	59	26	161	37	10	186	18	36	220	24	84	18	68
ENSG00000082512	1	0	0	0	0	0	2	28	2	1	7	1	1	0	7	4	2	74	67	170	10	1	32	4	11	13	15	17	0	29	1	0	16
ENSG00000082515	47	398	0	43	40	47	48	44	114	35	31	4	100	79	70	0	26	99	94	426	71	37	84	37	13	50	23	21	66	38	81	2	1
ENSG00000082516	8	138	0	3	21	0	23	12	26	55	12	1	0	38	11	0	1	10	11	1	1	51	0	10	0	1	13	0	23	0	0	0	0
ENSG00000082641	39	674	40	372	113	96	213	200	350	199	129	161	139	162	154	4	34	228	220	972	175	118	159	71	39	182	25	60	202	163	138	62	4
ENSG00000082701	10	596	20	219	48	37	109	75	155	64	69	84	114	127	105	20	4	227	219	55	92	100	92	66	56	103	102	75	121	39	1	60	8
ENSG00000082781	83	775	58	205	62	92	87	97	305	275	96	131	85	56	95	24	6	332	62	185	75	58	139	56	24	109	26	65	347	103	5	60	14
ENSG00000082805	38	210	45	219	74	59	163	74	79	162	115	199	88	0	68	18	3	121	148	653	117	40	61	67	38	62	39	87	45	81	6	36	17
ENSG00000082898	3	321	78	128	74	49	100	182	175	124	115	106	131	76	70	3	3	108	106	529	86	130	41	78	15	50	73	65	247	63	92	20	2
ENSG00000082996	119	448	29	284	106	85	75	146	122	75	120	174	171	84	63	48	7	107	148	109	24	273	68	51	61	66	409	209	113	90	190	124	7
ENSG00000083067	0	0	0	0	0	7	0	0	0	2	2	0	0	0	0	20	0	3	0	1	0	0	0	3	0	2	0	13	0	3	46	0	21
ENSG00000083093	0	180	10	32	33	22	31	47	80	28	35	0	54	20	35	0	0	38	33	3	31	0	65	22	6	5	9	0	15	27	80	19	2
ENSG00000083097	41	1020	12	227	65	65	149	196	151	73	17	56	94	168	49	1	27	175	111	1	77	23	56	46	43	67	8	34	166	45	94	25	3
ENSG00000083099	86	300	56	295	103	71	278	275	292	82	220	97	183	155	124	3	90	360	180	892	160	245	102	60	55	116	15	124	194	186	5	46	26
ENSG00000083123	0	231	0	2	3	2	7	0	19	0	16	78	6	0	2	0	0	36	6	0	0	0	0	0	0	0	2	5	5	0	2	0	1
ENSG00000083168	35	788	126	641	122	187	173	167	253	397	161	164	209	155	117	39	16	258	269	974	147	355	131	157	37	91	475	142	305	111	108	158	23
ENSG00000083223	73	1261	201	807	303	292	206	188	359	298	320	380	95	165	150	103	54	377	462	502	232	1043	64	185	144	212	550	370	263	243	150	394	144
ENSG00000083290	0	9	0	36	20	11	19	58	8	136	10	0	14	0	15	0	9	16	10	55	1	0	1	8	3	1	14	14	2	7	3	5	0
ENSG00000083307	24	910	17	144	138	71	253	89	243	276	70	157	145	67	145	0	39	185	431	355	98	44	38	62	35	127	15	43	138	37	4	13	6
ENSG00000083312	88	2151	80	631	350	253	323	347	603	234	388	237	436	504	220	29	21	493	461	1265	254	336	201	182	185	276	262	255	517	371	95	157	22
ENSG00000083444	2	116	23	17	17	36	17	0	22	0	18	3	11	1	22	0	2	37	23	2	38	25	0	16	19	12	3	21	54	31	0	113	1
ENSG00000083457	0	3	0	5	9	9	19	60	69	76	22	2	36	34	34	0	1	39	40	21	18	25	43	16	17	4	13	3	51	28	72	7	19
ENSG00000083520	40	776	55	227	95	107	132	184	262	25	128	55	207	79	101	34	2	232	177	480	81	165	60	87	64	122	101	130	196	95	9	44	32
ENSG00000083535	1	355	8	256	47	49	101	80	30	3	25	280	35	35	55	0	1	83	49	203	6	37	3	12	41	45	2	41	36	42	17	6	4
ENSG00000083544	3	211	0	76	12	11	95	54	86	96	66	2	44	56	48	0	14	58	108	2	18	0	26	22	19	35	7	24	69	17	2	21	1
ENSG00000083635	0	100	0	0	18	14	7	22	28	96	2	39	6	32	12	1	1	49	22	0	7	56	36	6	12	13	1	0	36	16	0	11	1
ENSG00000083642	52	515	9	136	71	62	108	101	166	2	90	40	130	107	115	13	0	106	117	77	71	60	44	57	59	53	87	85	154	84	2	63	3
ENSG00000083720	10	12	1	33	2	61	2	54	33	0	22	101	12	16	18	0	16	66	51	1	7	14	0	8	1	50	0	2	25	26	0	0	0
ENSG00000083750	0	0	7	28	1	0	0	24	3	6	2	22	7	1	17	0	1	26	11	0	18	0	0	1	7	13	4	1	32	6	0	2	0
ENSG00000083799	55	2310	101	543	128	197	193	339	438	472	162	311	258	197	189	35	85	445	261	1042	267	500	61	125	182	285	544	193	347	163	264	281	53
ENSG00000083807	0	0	0	0	0	1	1	0	6	0	1	9	0	0	1	0	0	0	0	15	0	1	0	0	0	3	0	13	0	0	1	0	0
ENSG00000083812	9	266	5	13	13	9	1	3	0	3	14	0	0	19	2	1	0	38	67	0	0	0	1	0	4	0	9	0	14	2	1	25	0
ENSG00000083814	0	0	0	0	0	0	0	0	1	1	0	0	0	0	0	0	0	0	35	0	0	0	0	0	2	0	6	0	0	0	0	0	0
ENSG00000083817	0	0	0	0	1	7	8	18	0	0	0	0	0	0	7	0	0	0	7	0	0	0	0	0	0	1	8	8	20	0	0	0	0
ENSG00000083828	0	34	0	7	2	14	22	0	0	0	0	0	1	1	4	0	0	8	9	152	2	7	1	0	1	0	8	0	4	6	0	5	0
ENSG00000083838	0	23	1	67	7	5	51	45	12	63	10	2	0	0	17	0	1	2	21	241	32	1	8	2	10	14	7	9	35	1	2	1	1
ENSG00000083844	60	78	4	183	64	53	115	104	83	123	16	21	57	9	54	11	31	70	200	166	89	5	5	38	36	16	41	63	29	56	1	13	31
ENSG00000083845	142	1842	182	430	352	248	501	551	530	337	838	449	504	686	415	32	85	932	489	1648	378	609	267	252	272	654	193	510	558	401	495	202	55
ENSG00000083857	86	1377	7	131	102	66	106	103	351	316	79	120	179	166	72	1	27	124	93	137	73	67	62	36	49	44	22	69	278	62	78	33	8
ENSG00000083896	183	1548	162	731	432	337	355	372	679	313	290	320	270	356	226	96	145	415	282	1143	293	655	195	144	165	270	271	242	382	352	176	331	129
ENSG00000083937	112	690	22	326	192	111	295	281	321	106	136	53	328	226	144	18	78	216	209	284	228	255	156	130	151	156	226	118	288	79	213	101	6
ENSG00000084070	91	113	317	733	138	190	99	126	119	59	85	532	99	142	49	164	54	142	84	20	134	382	142	231	76	89	972	283	71	157	421	967	214
ENSG00000084072	8	131	23	38	25	19	53	64	37	1	31	55	41	45	28	0	1	68	65	245	38	32	15	18	16	43	10	18	118	11	2	2	1
ENSG00000084073	68	425	9	104	105	51	110	83	70	329	53	109	241	51	87	18	14	82	45	382	34	74	154	102	35	25	24	26	84	55	14	82	31
ENSG00000084090	198	2415	77	709	330	310	650	745	961	956	321	375	540	514	383	11	141	1029	740	1112	371	424	203	247	229	437	128	220	660	278	244	100	48
ENSG00000084092	32	69	0	1	6	0	55	20	33	220	6	79	36	20	30	0	0	45	1	157	9	1	0	16	11	21	1	12	23	32	1	3	2
ENSG00000084093	70	1094	66	307	148	175	230	250	300	262	183	85	132	368	138	1	4	218	215	413	118	260	78	113	74	128	82	96	260	150	5	48	18
ENSG00000084110	12	43	7	28	0	2	0	25	0	0	7	0	1	0	0	0	0	0	26	0	0	34	0	9	8	4	18	3	0	1	28	60	2
ENSG00000084112	81	82	25	198	61	57	40	55	151	136	74	134	74	4	53	17	19	148	311	251	140	82	29	40	21	67	79	84	75	29	160	74	45
ENSG00000084207	481	12750	647	3980	1967	1361	3498	3425	5735	3021	2970	1516	2292	2086	2069	136	790	6217	3317	15458	2977	3276	2304	1910	1266	2408	617	2457	3104	2131	1753	670	282
ENSG00000084234	500	5183	273	2151	870	747	1305	1057	1828	1407	685	980	959	2367	877	51	255	2144	1964	2523	914	1033	1135	556	361	865	505	606	1862	766	347	670	163
ENSG00000084444	2	0	0	11	16	8	1	0	7	0	0	0	0	0	0	0	0	9	0	1	0	0	1	0	0	0	3	0	1	0	1	0	1
ENSG00000084463	23	490	28	346	116	87	238	180	236	392	117	58	169	78	157	2	46	217	200	941	99	86	76	80	47	133	73	129	254	145	210	80	28
ENSG00000084623	49	265	61	218	45	46	100	130	139	247	130	62	146	117	108	3	2	179	122	63	107	73	138	55	49	167	95	58	102	77	33	22	28
ENSG00000084636	1	0	0	18	0	5	0	0	10	4	7	1	0	1	2	2	8	34	0	133	0	0	15	1	0	2	4	6	5	1	2	1	0
ENSG00000084652	7	637	27	222	53	83	86	10	173	61	111	57	59	234	84	1	2	63	106	372	65	40	198	57	32	134	28	18	66	50	26	2	13
ENSG00000084674	9	2	11	0	7	0	0	7	0	68	4	0	0	2	0	2	9	6	2	5	9	2	6	0	2	2	5	11	7	2	8	1	1
ENSG00000084676	9	177	76	172	103	37	89	94	81	100	48	69	91	30	37	29	16	93	118	2	143	251	79	44	54	67	243	107	157	70	2	150	52
ENSG00000084693	0	41	0	74	4	30	27	26	52	3	3	33	21	25	30	0	30	45	103	122	11	1	3	15	1	3	1	19	39	26	3	6	0
ENSG00000084731	0	0	0	5	1	0	2	8	0	0	0	0	0	0	0	0	0	0	0	1	16	0	0	2	0	10	0	0	2	0	0	10	0
ENSG00000084733	185	1247	20	383	270	164	260	281	648	595	366	254	522	407	188	27	23	470	338	953	173	302	336	125	143	309	222	148	303	181	278	109	21
ENSG00000084754	44	1240	91	279	154	112	220	244	257	306	269	235	136	278	151	12	35	326	213	32	155	108	179	87	88	150	130	115	297	202	71	73	39
ENSG00000084764	0	0	0	9	14	5	1	51	22	120	0	31	0	1	4	0	0	3	50	0	54	1	8	0	4	3	1	8	3	1	0	2	5
ENSG00000084774	6	94	5	1	7	18	21	27	31	0	8	3	10	0	4	10	1	21	40	115	0	4	20	11	17	22	1	50	22	10	39	1	1
ENSG00000085063	176	3800	174	2087	619	619	1156	1766	1571	1386	1010	838	605	1021	865	51	81	1449	1556	3729	694	987	648	371	337	755	392	584	1132	723	655	278	167
ENSG00000085117	390	6154	287	2105	795	642	1230	910	1924	1703	815	825	1105	1325	750	164	403	2595	2102	3609	1270	1536	1607	464	605	784	763	633	1264	716	894	1535	425
ENSG00000085185	0	23	0	9	1	7	6	7	26	1	3	69	16	0	1	0	0	35	38	0	5	0	18	0	3	2	8	0	2	10	0	31	4
ENSG00000085224	176	1723	113	1120	332	219	667	786	597	428	361	206	345	448	391	79	42	679	413	829	345	297	186	279	187	319	333	311	761	231	22	387	31
ENSG00000085231	9	295	0	54	28	3	63	134	48	80	37	2	52	146	12	0	1	49	47	1	12	45	6	14	24	64	7	11	28	20	1	11	2
ENSG00000085265	0	2	33	45	7	8	1	0	1	1	5	6	1	0	4	38	0	1	0	0	28	84	1	13	45	2	88	1	2	1	1	171	64
ENSG00000085274	0	103	1	36	28	13	21	16	31	70	44	2	58	1	20	0	0	59	11	119	7	2	4	3	25	24	23	26	59	2	1	8	3
ENSG00000085276	44	920	36	318	147	107	214	219	380	366	92	33	165	149	117	9	28	280	297	1308	135	83	77	92	100	190	24	55	181	85	61	22	8
ENSG00000085365	4	258	8	255	150	68	195	127	301	352	79	7	94	77	129	1	17	194	208	627	113	4	77	82	49	105	38	123	206	90	5	95	3
ENSG00000085377	2	139	4	37	53	15	44	49	75	196	10	48	8	35	16	0	15	64	80	149	52	9	17	20	21	28	4	8	88	20	79	4	1
ENSG00000085382	24	0	0	0	24	5	12	13	2	48	6	0	43	54	5	0	0	0	20	59	0	1	1	8	3	18	0	0	9	0	2	0	0
ENSG00000085415	29	150	0	19	26	8	25	19	39	27	11	2	25	0	25	7	29	54	40	310	39	14	28	10	12	36	9	12	21	11	9	3	25
ENSG00000085433	0	13	1	18	15	18	80	53	27	247	37	0	30	42	31	0	28	29	31	0	6	0	8	9	7	26	21	27	42	14	4	40	10
ENSG00000085449	74	1005	30	121	111	102	256	190	206	46	121	88	165	90	108	1	8	200	149	469	39	53	61	78	127	169	50	68	274	98	111	22	4
ENSG00000085465	0	0	0	18	9	10	0	2	1	64	0	1	0	1	4	0	0	12	3	0	0	1	0	7	0	15	1	0	1	0	0	2	0
ENSG00000085491	99	797	15	172	114	70	205	157	197	239	131	127	164	325	99	7	80	186	167	435	98	169	75	74	96	182	52	41	244	86	65	9	5
ENSG00000085511	28	304	18	203	67	85	89	42	123	125	95	4	132	47	35	1	40	162	144	634	51	68	97	42	22	83	3	52	203	49	6	20	3
ENSG00000085514	24	15	24	52	14	15	0	20	46	1	17	44	0	0	0	16	0	34	5	0	43	168	3	24	24	20	121	28	0	31	26	130	133
ENSG00000085552	1	181	0	62	41	39	49	22	55	1	28	5	22	10	21	1	1	109	52	132	36	6	29	11	4	17	2	6	58	21	0	7	2
ENSG00000085563	0	4	0	0	0	0	5	0	1	0	7	0	10	0	0	0	0	7	21	0	1	0	0	0	0	0	0	6	0	8	0	0	0
ENSG00000085644	0	0	0	0	0	6	0	0	2	58	0	0	1	10	11	0	0	9	0	0	12	0	1	2	0	0	6	11	8	0	0	1	0
ENSG00000085662	153	725	18	497	215	265	125	136	483	131	150	91	381	314	39	27	64	289	306	373	206	1135	373	79	47	183	89	289	1134	282	203	217	6
ENSG00000085719	54	930	92	333	170	102	327	219	291	21	195	286	156	296	130	19	22	262	454	884	137	113	94	94	66	259	36	90	149	137	62	46	11
ENSG00000085721	27	395	8	96	63	17	97	93	95	215	31	57	76	40	52	2	32	302	192	743	83	13	64	28	15	52	7	6	77	39	171	5	8
ENSG00000085733	219	4254	47	710	588	392	885	537	1152	1235	380	524	756	533	456	57	203	1433	1877	2975	950	391	853	245	183	664	118	192	1012	276	586	87	76
ENSG00000085760	19	338	43	138	124	56	149	34	113	101	86	92	76	60	56	21	24	122	90	222	50	52	64	31	24	67	24	84	105	68	4	6	2
ENSG00000085788	0	71	3	36	21	21	14	35	20	38	22	2	28	111	29	0	7	57	101	0	35	7	15	3	4	29	1	0	23	17	1	2	0
ENSG00000085831	34	619	10	93	63	31	85	25	107	178	19	123	101	51	29	1	102	160	189	451	55	14	41	31	36	75	40	14	144	93	2	7	5
ENSG00000085832	11	483	46	101	59	63	41	126	141	91	78	102	58	117	72	11	0	112	83	275	132	88	40	18	39	71	65	50	69	24	4	37	8
ENSG00000085840	0	0	0	5	0	0	0	0	1	0	0	0	3	0	0	0	0	13	0	1	1	0	0	0	9	0	0	3	0	0	0	0	0
ENSG00000085871	77	1489	21	287	184	125	419	285	401	198	242	113	380	487	298	17	38	400	357	1664	159	99	192	91	130	281	74	84	440	134	24	31	10
ENSG00000085872	10	342	1	115	72	38	128	140	167	228	63	33	110	75	37	0	42	113	118	129	39	78	150	22	10	77	42	32	75	41	91	77	24
ENSG00000085978	12	310	1	33	51	14	149	58	79	141	16	1	38	59	32	1	0	84	113	1	53	4	39	31	18	42	9	2	54	26	4	4	1
ENSG00000085982	39	1066	13	191	104	54	58	123	158	308	57	34	65	81	59	1	25	91	212	826	63	16	132	21	24	89	18	34	77	37	9	18	1
ENSG00000085998	19	64	0	35	4	1	25	2	19	14	13	26	5	1	17	1	19	10	23	0	3	0	0	2	4	0	1	10	0	1	3	0	2
ENSG00000086015	28	108	0	54	20	26	34	37	68	2	12	2	9	0	27	0	0	65	43	1	32	60	1	17	13	1	1	15	31	31	0	4	2
ENSG00000086061	82	1260	82	513	284	200	313	587	417	507	186	293	384	160	239	38	73	395	507	1784	274	424	261	210	237	261	509	284	333	256	430	341	59
ENSG00000086062	495	4656	124	1150	837	765	1113	770	1519	1665	489	1209	959	959	501	59	177	1852	1497	3356	844	916	702	538	334	787	481	340	2167	565	466	679	188
ENSG00000086065	87	1570	7	347	247	150	556	343	308	616	184	481	468	478	283	91	113	708	872	2986	262	230	378	187	179	362	147	133	519	202	97	182	86
ENSG00000086102	39	440	18	324	111	79	135	205	176	248	56	18	143	38	113	4	4	216	144	833	143	49	27	84	55	105	27	71	180	33	43	11	5
ENSG00000086159	0	100	0	0	10	0	1	7	0	1	1	0	4	0	6	0	0	2	0	0	8	1	1	1	1	0	0	0	0	0	0	0	0
ENSG00000086189	0	61	1	30	7	22	26	56	65	16	10	7	74	0	42	0	0	55	21	149	18	56	52	27	5	29	2	9	26	20	1	1	0
ENSG00000086200	26	216	10	122	24	12	53	95	32	34	11	18	37	42	14	1	0	45	63	75	23	18	23	21	3	11	4	3	31	2	2	7	3
ENSG00000086205	0	41	0	0	9	0	11	0	8	0	0	0	34	0	0	0	0	0	0	1	3	0	1	3	0	5	0	0	6	0	0	0	0
ENSG00000086232	71	1030	21	339	101	93	206	204	322	170	90	18	83	114	121	0	30	241	347	792	48	151	47	67	50	105	53	101	217	98	11	16	6
ENSG00000086288	13	0	0	0	6	6	0	0	0	0	0	0	0	0	0	0	0	0	0	0	0	0	0	1	0	1	44	0	0	0	0	16	0
ENSG00000086289	0	45	0	109	2	12	13	0	2	12	1	1	11	51	24	0	1	45	35	1	21	0	25	1	2	8	1	0	30	7	2	2	0
ENSG00000086300	56	133	20	102	44	14	7	22	22	114	27	103	0	1	2	27	0	20	67	0	73	120	30	20	133	4	461	192	57	45	55	217	77
ENSG00000086475	26	268	6	108	57	51	127	154	116	454	48	10	85	17	41	3	2	171	180	209	53	11	59	42	29	43	14	16	120	24	35	34	3
ENSG00000086504	29	182	15	38	36	39	59	45	82	56	50	7	77	26	49	9	4	60	106	234	48	35	18	22	17	45	48	25	79	28	79	29	2
ENSG00000086544	24	544	7	153	109	67	105	117	88	227	61	70	88	111	8	3	17	85	207	424	191	281	76	34	23	29	130	67	141	66	90	17	3
ENSG00000086548	246	6445	154	748	922	574	1042	589	967	1162	275	320	965	2483	442	26	174	545	1110	1847	404	495	526	213	300	760	285	213	1117	484	83	134	28
ENSG00000086570	28	123	4	25	54	21	42	8	87	30	72	3	51	120	41	9	15	260	30	274	23	35	30	1	3	65	1	9	13	0	19	0	5
ENSG00000086589	74	981	36	245	129	90	249	189	152	193	100	142	138	277	145	2	55	194	219	854	124	254	98	72	67	114	138	130	218	91	60	155	16
ENSG00000086598	23	964	22	148	126	77	200	135	288	392	211	39	204	147	138	10	46	227	169	731	101	127	145	85	87	150	94	96	189	130	73	36	3
ENSG00000086619	29	160	0	33	46	24	52	87	68	191	46	7	37	25	39	1	12	82	29	9	29	45	31	13	45	56	27	14	53	57	0	76	0
ENSG00000086666	128	890	54	463	238	172	340	460	286	336	230	37	364	249	136	22	84	416	526	857	203	300	57	153	123	165	300	172	388	224	66	137	36
ENSG00000086696	0	32	1	0	0	0	0	0	17	0	11	0	0	0	5	2	1	15	16	0	1	1	1	0	0	15	20	0	4	4	0	4	10
ENSG00000086712	0	296	8	20	2	21	29	52	75	18	12	46	83	1	46	2	8	45	64	180	18	2	30	25	2	12	2	17	32	28	1	4	1
ENSG00000086730	4	3	7	69	24	39	0	0	33	1	16	177	1	0	6	11	39	21	0	1	24	123	26	37	17	7	229	45	0	20	54	334	104
ENSG00000086758	21	774	100	682	183	159	335	416	412	239	260	117	191	233	180	25	52	338	308	731	197	347	148	98	126	116	96	147	383	236	116	97	17
ENSG00000086827	6	372	12	66	38	16	35	24	84	3	61	4	46	5	80	0	28	131	88	133	89	66	61	11	13	133	12	15	49	44	2	25	1
ENSG00000086848	3	108	0	1	1	12	9	0	0	1	4	0	2	0	2	5	0	20	33	0	5	0	0	1	2	0	0	0	0	0	1	16	1
ENSG00000086991	0	0	0	0	1	14	0	0	0	0	1	1	0	0	0	0	0	16	0	0	0	0	0	0	0	0	0	7	2	5	81	0	0
ENSG00000087008	1	502	9	202	58	84	60	40	51	264	36	1	10	29	35	0	5	58	139	219	91	67	13	36	41	20	10	23	120	25	7	5	0
ENSG00000087053	3	55	0	95	12	21	43	63	84	242	9	43	44	32	28	0	2	39	73	1	35	51	1	9	10	31	19	21	62	53	3	6	1
ENSG00000087074	97	1364	379	981	369	309	200	351	263	385	195	965	174	270	58	441	366	217	550	2565	740	1170	386	295	803	107	1675	413	361	385	1689	2579	696
ENSG00000087076	0	0	0	0	0	0	0	0	0	0	0	0	0	26	0	0	0	11	0	0	0	8	0	0	1	0	0	0	0	0	0	0	1
ENSG00000087077	11	519	2	34	64	61	132	131	229	206	74	26	193	180	97	1	32	168	378	524	196	147	77	22	37	108	34	65	181	22	20	27	1
ENSG00000087085	0	0	0	0	0	0	0	0	0	0	0	0	0	0	0	0	0	3	6	0	0	0	0	0	0	0	1	8	0	0	0	0	0
ENSG00000087086	291	4736	277	1784	612	791	1137	1103	1535	1991	694	1066	714	1380	618	245	175	991	1698	6379	1011	2374	640	1030	1678	705	4954	1193	1285	916	1169	3365	416
ENSG00000087087	37	473	33	317	150	109	104	74	258	65	116	74	130	133	83	18	18	131	294	154	111	101	12	46	43	80	72	62	149	186	25	68	30
ENSG00000087088	4	25	0	28	23	36	39	23	43	70	17	8	11	40	16	14	35	343	216	172	117	77	136	17	24	33	24	14	24	12	129	282	7
ENSG00000087095	13	44	4	100	21	11	1	70	65	102	19	1	6	51	22	0	1	13	41	0	42	8	13	17	6	42	5	23	19	32	1	1	3
ENSG00000087111	31	596	30	121	92	86	96	136	83	71	66	31	86	108	65	20	27	196	122	329	45	30	22	52	23	80	15	51	148	72	40	82	1
ENSG00000087128	0	442	52	263	126	30	16	117	46	316	88	0	22	72	31	12	39	10	111	464	110	441	45	33	38	29	79	50	111	14	124	56	9
ENSG00000087152	44	1124	54	229	79	127	258	126	445	339	142	78	365	335	153	32	50	337	517	820	216	224	308	87	57	140	160	81	343	161	207	281	127
ENSG00000087157	33	0	10	40	15	27	4	12	7	2	22	70	1	18	12	1	2	10	49	7	34	4	14	31	24	21	276	34	35	26	2	102	45
ENSG00000087191	73	584	60	221	119	107	301	216	272	133	188	27	186	108	108	4	25	327	249	1134	198	160	153	80	47	126	25	145	192	146	88	105	6
ENSG00000087206	22	153	20	59	68	46	22	50	55	34	17	87	63	0	50	2	34	13	28	237	8	15	37	20	6	24	103	49	53	37	103	40	77
ENSG00000087245	0	0	0	7	1	0	0	0	18	0	0	0	0	0	7	0	0	30	0	0	1	0	1	0	0	0	0	0	9	0	1	0	0
ENSG00000087250	0	59	0	11	5	0	73	17	0	98	1	0	1	0	31	0	0	47	39	1	0	1	27	10	0	14	1	31	1	3	3	1	1
ENSG00000087253	37	94	10	50	31	10	59	23	59	0	25	10	68	75	14	15	29	61	31	3	43	61	50	13	17	22	211	30	44	11	1	71	3
ENSG00000087258	0	0	0	0	0	0	0	0	0	0	0	0	0	0	0	0	0	3	0	0	0	1	0	0	0	0	0	0	21	6	0	0	0
ENSG00000087263	28	356	12	62	53	43	103	86	120	171	100	38	53	70	37	0	25	107	28	1	49	73	26	24	8	49	9	31	137	54	3	1	2
ENSG00000087266	44	456	136	99	56	95	98	29	176	83	118	157	79	254	37	13	29	183	116	626	96	471	63	69	97	56	215	106	221	87	89	140	35
ENSG00000087269	50	279	35	123	79	25	88	57	203	53	70	89	37	55	105	3	0	126	83	361	84	42	49	40	13	83	15	32	134	76	3	6	1
ENSG00000087274	16	377	10	261	91	70	120	138	140	165	65	71	67	188	74	18	38	175	278	657	141	59	60	66	29	56	114	39	180	76	113	70	35
ENSG00000087299	1	11	0	39	23	30	66	11	39	124	11	1	19	30	5	0	1	45	128	387	33	49	0	9	1	40	2	18	3	61	1	29	0
ENSG00000087301	2	5	0	44	2	23	8	22	30	0	19	21	6	0	6	1	1	11	0	83	23	28	2	1	8	21	2	2	57	2	52	1	1
ENSG00000087302	142	719	63	118	104	86	265	301	331	557	138	105	233	125	122	3	64	209	210	1303	314	130	177	110	73	162	119	138	224	86	7	50	35
ENSG00000087338	18	638	13	190	57	34	136	94	81	229	29	80	87	37	49	5	50	137	289	21	63	85	75	48	34	69	38	15	132	84	6	53	47
ENSG00000087365	88	1786	201	1103	306	213	334	285	708	587	352	447	393	300	300	11	96	368	432	2620	286	381	275	165	138	230	220	215	491	417	31	166	87
ENSG00000087448	1	233	1	51	23	53	40	71	87	1	68	28	62	106	74	0	12	120	158	186	51	47	15	13	13	68	1	59	69	18	1	2	6
ENSG00000087460	97	1146	27	419	295	176	302	387	361	351	163	336	243	279	171	11	36	379	436	1127	139	261	246	131	89	222	174	160	327	164	117	93	56
ENSG00000087470	88	468	41	282	81	69	146	154	241	134	164	52	189	192	138	2	35	214	57	5	15	94	55	76	42	105	47	95	148	78	2	57	2
ENSG00000087494	0	0	3	0	15	7	5	0	60	1	45	3	24	2	9	0	0	87	0	0	10	0	14	2	0	1	4	58	0	3	0	0	0
ENSG00000087495	0	0	0	1	0	0	1	1	0	0	0	0	0	1	0	0	18	0	0	0	0	0	1	14	0	1	0	0	8	0	0	0	0
ENSG00000087502	20	297	21	259	157	77	158	154	124	229	78	111	157	166	62	33	63	119	120	797	104	54	100	61	34	47	106	53	94	124	10	52	32
ENSG00000087510	51	580	30	122	117	106	168	155	123	268	45	191	111	189	50	8	44	173	238	5	83	161	109	14	25	77	41	60	85	66	89	17	1
ENSG00000087586	1	47	0	20	10	2	0	11	29	0	13	1	64	0	6	2	0	18	28	2	4	0	0	10	9	18	12	0	78	14	3	64	33
ENSG00000087589	1	81	9	186	58	42	0	1	15	2	27	88	4	0	0	18	10	34	1	0	28	88	2	39	3	3	187	95	1	48	45	208	48
ENSG00000087842	0	215	0	118	56	3	51	12	28	44	9	33	33	18	29	0	0	64	1	1	23	0	6	10	15	28	1	38	16	28	0	20	0
ENSG00000087884	0	142	18	58	36	16	73	42	176	83	48	34	29	97	39	1	15	153	35	75	26	18	82	16	23	78	14	40	75	17	29	16	2
ENSG00000087903	2	114	1	178	20	22	83	98	39	0	21	90	1	1	43	24	4	29	72	918	13	45	70	41	14	14	101	11	0	43	12	43	65
ENSG00000087995	1	165	3	40	21	7	16	45	79	58	44	104	21	45	33	1	0	23	61	357	68	37	11	24	32	20	8	13	17	28	17	0	29
ENSG00000088002	0	8	0	9	16	2	0	17	12	0	18	1	3	0	0	1	0	8	0	0	1	43	1	4	0	11	3	7	0	8	0	0	7
ENSG00000088035	0	148	0	18	36	1	48	32	24	28	29	2	37	58	4	1	2	87	62	1	15	63	2	6	8	40	9	22	68	3	1	22	13
ENSG00000088038	13	135	0	18	26	20	16	35	23	98	22	0	10	26	7	15	11	29	61	0	47	1	19	13	21	1	8	5	32	7	70	6	28
ENSG00000088053	0	0	0	0	1	0	0	0	0	0	0	0	0	0	0	0	0	0	0	0	32	0	0	4	0	0	7	0	1	2	0	0	0
ENSG00000088179	15	46	9	92	4	23	53	89	31	114	18	92	50	1	43	2	0	69	51	0	3	1	0	15	8	28	1	9	42	21	3	30	4
ENSG00000088205	71	499	2	270	119	106	258	228	252	315	195	264	254	205	177	1	87	362	235	152	69	180	162	83	74	163	113	107	251	140	48	241	33
ENSG00000088247	129	2338	78	732	348	308	706	365	674	365	352	268	404	385	402	25	107	573	750	1207	498	329	272	202	150	391	189	273	947	377	172	124	89
ENSG00000088256	56	989	43	593	99	139	259	165	320	408	74	171	181	204	159	1	52	326	413	902	253	211	373	83	88	128	45	136	281	109	135	28	35
ENSG00000088280	0	53	1	49	31	15	42	1	35	3	13	120	1	0	23	0	1	84	37	0	23	0	50	2	11	40	14	6	49	12	2	0	3
ENSG00000088298	0	60	0	21	27	13	22	0	5	74	5	0	5	0	14	0	1	40	1	1	5	9	3	2	0	21	28	3	35	2	1	9	1
ENSG00000088305	2	1	1	0	6	0	2	2	0	0	13	1	4	0	1	0	0	3	0	0	1	1	1	1	0	1	0	12	6	1	4	0	0
ENSG00000088320	0	0	0	5	0	0	7	0	0	1	0	0	0	0	0	0	0	8	0	0	3	0	0	0	0	1	0	0	0	0	0	0	0
ENSG00000088325	2	143	1	1	13	1	0	1	11	125	59	1	27	38	16	0	0	11	0	3	8	5	0	2	0	16	1	21	9	8	34	1	0
ENSG00000088340	23	30	1	210	20	30	27	31	13	0	36	16	3	27	2	0	1	18	75	241	55	9	68	12	4	11	1	2	51	46	2	1	1
ENSG00000088356	0	179	9	35	16	24	35	0	40	5	30	2	3	24	2	6	0	86	163	250	43	15	16	6	2	16	20	15	1	64	3	42	3
ENSG00000088367	37	1237	56	486	232	184	261	154	369	536	153	142	168	208	157	1	128	490	289	630	214	162	153	188	89	266	25	107	449	230	159	8	9
ENSG00000088386	0	0	1	22	22	13	45	20	24	0	18	0	0	0	1	0	0	2	16	0	15	28	3	1	9	7	15	0	0	10	33	0	0
ENSG00000088387	26	265	6	82	136	17	85	64	27	102	63	28	94	135	119	11	51	123	307	379	33	23	89	18	30	69	8	34	207	28	48	8	3
ENSG00000088448	6	338	25	151	84	64	124	63	87	4	48	79	88	153	94	0	25	171	180	55	40	49	49	41	22	55	52	39	131	88	214	68	3
ENSG00000088451	1	0	1	78	9	0	7	6	23	78	11	75	2	30	8	0	0	34	29	1	2	0	18	6	3	11	2	6	4	11	59	0	1
ENSG00000088538	1	105	0	0	1	0	2	14	1	1	2	0	0	0	2	13	0	8	1	0	0	1	1	5	0	1	0	0	0	0	0	0	0
ENSG00000088543	0	0	0	0	0	2	0	14	0	0	0	0	0	0	0	0	0	0	6	0	0	0	0	1	0	0	6	0	0	3	1	0	0
ENSG00000088682	25	68	0	101	8	16	14	48	31	45	28	5	38	3	31	0	1	62	42	101	30	31	10	17	13	33	6	12	88	24	2	4	1
ENSG00000088726	0	136	62	146	82	12	60	30	57	23	134	0	37	50	10	6	17	31	60	130	36	107	6	11	23	3	29	52	6	6	30	6	71
ENSG00000088727	1	34	26	197	11	25	141	203	19	245	15	68	41	78	102	1	2	116	159	1358	119	13	51	55	15	31	3	31	28	64	5	15	17
ENSG00000088756	0	1	0	9	0	0	0	0	8	0	0	0	0	0	0	0	0	0	0	0	1	0	13	0	0	0	0	0	27	0	1	0	0
ENSG00000088766	32	296	5	85	73	40	103	157	73	113	56	34	60	128	70	0	1	117	207	166	16	3	59	39	29	49	31	27	71	36	27	4	4
ENSG00000088808	6	234	0	12	20	43	62	18	64	63	13	1	62	26	28	1	7	62	42	1	38	1	82	8	18	89	6	2	37	7	1	5	2
ENSG00000088812	14	257	4	140	76	27	121	48	112	356	56	26	26	202	22	2	24	273	137	332	113	40	147	52	33	38	15	25	71	30	92	7	4
ENSG00000088826	0	94	1	0	0	0	7	0	0	38	7	0	11	4	3	0	2	3	0	1	6	8	0	5	1	13	7	29	29	11	5	39	0
ENSG00000088827	0	0	0	0	0	0	0	5	24	0	0	16	0	0	0	0	0	3	29	0	2	0	0	0	10	1	0	0	0	0	0	0	0
ENSG00000088832	38	970	61	222	207	162	259	217	395	582	194	43	259	368	200	40	27	251	342	1534	220	241	222	110	120	171	419	101	244	213	130	287	34
ENSG00000088833	36	835	64	271	68	84	137	108	157	230	101	182	113	46	85	7	43	136	180	780	140	160	141	53	28	112	67	141	136	104	4	60	3
ENSG00000088836	113	1897	81	639	597	360	402	471	777	1062	352	293	259	323	444	16	124	640	1233	1146	591	255	550	88	68	279	60	70	619	287	346	76	17
ENSG00000088854	18	94	10	163	66	15	38	104	79	0	31	100	53	64	20	4	1	75	82	143	36	24	59	22	10	64	7	12	67	20	0	23	2
ENSG00000088876	1	0	0	0	19	11	12	0	7	0	6	0	0	65	0	0	1	11	22	0	1	0	2	4	0	1	0	0	39	20	0	0	5
ENSG00000088881	5	1	0	35	22	1	34	20	19	1	3	0	0	0	11	1	1	4	16	121	4	15	1	5	2	0	4	15	4	12	0	0	0
ENSG00000088882	0	0	0	1	0	2	0	0	32	0	1	0	0	0	0	0	0	0	1	0	12	1	0	0	9	1	2	0	0	0	4	0	0
ENSG00000088888	115	1284	104	766	270	166	479	338	432	437	256	301	238	353	191	16	107	479	814	837	213	331	349	134	113	322	47	158	376	228	22	52	11
ENSG00000088899	10	175	11	96	22	56	34	104	86	1	18	1	12	37	23	0	25	80	85	125	55	1	8	26	20	75	3	41	29	38	1	5	3
ENSG00000088930	54	629	104	617	218	154	86	216	226	279	242	94	133	114	147	53	20	287	117	147	108	144	17	101	68	125	561	219	134	107	122	191	137
ENSG00000088970	0	0	8	55	9	18	3	46	5	57	1	20	22	3	15	0	0	44	21	246	12	1	2	0	8	1	32	29	11	20	3	7	1
ENSG00000088986	150	2742	25	1114	404	216	1041	1095	871	2097	257	456	615	493	594	9	100	902	1475	3707	567	352	417	297	202	674	119	315	720	409	313	120	22
ENSG00000088992	0	0	0	16	1	1	0	2	8	0	3	0	2	0	4	1	0	0	0	2	1	1	16	2	0	1	3	10	1	13	1	7	0
ENSG00000089006	125	682	21	178	118	78	155	288	363	256	188	22	174	211	169	14	27	285	187	441	176	168	131	90	93	166	21	67	235	137	57	65	71
ENSG00000089009	92	1267	34	130	141	89	219	262	410	139	326	171	288	122	300	3	47	445	501	1896	326	225	185	101	103	314	56	122	182	128	123	95	15
ENSG00000089012	0	0	0	0	0	0	0	0	0	0	0	1	0	0	0	0	0	6	0	0	0	8	0	0	0	0	0	0	0	0	0	0	0
ENSG00000089022	15	229	2	59	33	37	35	50	40	61	50	53	33	93	35	0	1	45	112	154	57	16	61	19	7	29	3	22	63	2	2	10	0
ENSG00000089041	0	6	2	32	5	4	13	2	25	0	0	0	10	0	4	4	0	4	22	0	4	24	5	7	11	2	1	0	2	34	92	11	25
ENSG00000089048	44	339	18	272	107	72	144	135	211	51	177	52	70	38	131	2	38	183	142	460	84	76	83	83	46	106	8	100	281	72	7	45	6
ENSG00000089050	0	120	0	46	17	23	70	77	72	33	23	83	26	50	36	0	0	85	44	0	11	18	6	14	7	35	2	11	124	50	1	1	33
ENSG00000089053	34	259	13	446	154	134	326	219	208	165	116	164	106	197	190	0	54	354	422	840	139	99	230	69	32	137	46	55	252	143	163	36	16
ENSG00000089057	20	135	11	78	46	44	63	22	23	130	12	14	42	33	45	0	15	107	139	306	60	7	28	14	8	13	17	26	56	34	2	32	1
ENSG00000089060	82	316	0	143	61	43	56	38	51	3	30	152	21	90	29	21	22	122	103	1	84	34	114	18	15	30	15	1	72	9	1	41	1
ENSG00000089063	5	202	3	78	39	42	53	53	53	127	25	42	102	1	67	4	4	119	253	485	61	48	71	46	23	97	5	4	166	21	3	38	3
ENSG00000089091	0	0	0	82	18	1	29	32	53	48	11	31	0	83	13	0	0	21	82	245	32	0	0	9	3	1	0	1	56	3	1	0	1
ENSG00000089094	19	301	12	101	45	48	102	4	86	140	67	54	39	10	36	1	10	132	53	346	37	39	44	13	11	69	13	47	81	45	0	20	1
ENSG00000089101	0	0	0	55	0	0	5	17	0	0	0	0	0	0	0	0	0	9	12	8	35	0	8	1	1	2	0	3	0	9	0	0	0
ENSG00000089123	0	102	0	70	15	5	26	12	1	1	6	0	21	0	1	0	0	52	12	1	6	3	16	2	7	23	1	17	5	4	1	0	1
ENSG00000089127	75	1334	38	344	323	223	241	151	317	229	229	93	326	241	133	6	232	263	318	14	342	584	196	107	151	135	306	116	339	306	21	125	64
ENSG00000089154	21	451	8	233	103	48	144	77	226	103	75	19	55	90	28	10	17	200	98	467	56	78	60	35	49	44	10	39	139	63	83	14	3
ENSG00000089157	1443	19605	680	3185	2480	2092	5992	3988	7378	5221	4531	3566	6343	3279	3628	147	870	8475	6494	15495	3322	2178	3809	2278	2046	5711	925	1948	5610	2692	2543	1266	345
ENSG00000089159	106	1275	67	775	285	270	379	265	526	629	148	359	196	203	157	246	68	823	896	2647	507	522	322	178	154	238	958	203	527	182	580	926	435
ENSG00000089163	0	0	0	0	1	4	0	13	0	71	1	0	1	0	0	0	0	0	1	1	0	0	1	2	0	1	0	0	0	5	1	1	0
ENSG00000089177	26	446	0	109	33	4	49	27	69	27	22	240	59	34	52	0	7	38	30	257	34	25	39	38	27	40	15	72	104	39	8	1	3
ENSG00000089195	65	242	10	72	16	40	125	163	152	325	56	117	81	10	53	4	13	200	69	267	35	47	22	55	7	30	26	48	46	65	4	15	1
ENSG00000089199	0	0	0	0	0	1	0	0	0	0	0	0	0	0	0	0	0	0	0	0	0	0	0	0	0	1	0	0	1	0	62	10	0
ENSG00000089220	218	3539	106	1396	588	526	1440	1213	1090	1755	402	959	535	483	740	5	229	1422	1511	3551	736	397	707	467	183	707	79	360	818	514	189	163	48
ENSG00000089234	1	86	10	136	33	47	57	26	80	0	30	1	46	34	15	2	0	40	31	60	11	27	39	16	20	12	30	42	19	18	65	16	22
ENSG00000089248	97	1699	158	590	160	173	562	498	605	555	191	156	319	552	250	29	38	468	356	726	304	272	386	147	113	280	112	108	404	292	77	44	43
ENSG00000089250	0	0	0	0	0	1	0	0	0	0	0	0	0	0	0	0	0	0	0	1	3	0	0	1	0	0	0	2	0	11	43	0	40
ENSG00000089280	117	1984	143	768	412	362	606	357	729	345	399	353	386	451	277	41	160	757	774	2221	345	684	261	154	179	262	689	242	606	194	194	534	187
ENSG00000089289	2	324	26	148	108	71	64	137	179	57	89	45	191	31	55	5	5	93	96	532	39	107	5	56	41	105	41	88	102	59	6	51	1
ENSG00000089327	6	42	0	57	14	10	13	1	31	1	11	4	25	25	3	0	0	71	22	5	0	39	75	3	2	2	15	3	33	16	0	122	0
ENSG00000089335	3	206	0	18	20	22	34	84	44	2	25	1	13	49	37	0	50	22	84	109	55	8	1	10	7	27	1	16	32	5	1	1	2
ENSG00000089351	3	55	12	90	10	9	0	3	10	2	14	0	17	1	20	21	0	37	20	4	16	20	6	16	59	6	190	33	2	11	2	170	81
ENSG00000089356	378	5818	148	1545	1120	787	1935	2090	2084	1836	1612	684	1787	1918	771	56	269	1786	2194	10250	1306	738	1341	592	531	1343	632	706	1969	873	688	332	51
ENSG00000089472	0	0	0	3	6	0	0	0	0	0	13	0	0	0	0	0	0	15	0	0	21	1	7	2	0	3	0	0	0	0	0	0	0
ENSG00000089486	17	92	0	5	10	9	24	3	1	1	9	39	3	10	12	1	0	32	37	1	2	15	1	6	2	0	16	8	18	18	1	1	2
ENSG00000089558	0	0	0	14	0	0	0	0	0	0	0	0	0	0	0	0	0	0	0	0	20	0	0	0	0	0	7	0	0	0	0	0	0
ENSG00000089597	347	3155	104	1009	486	433	1096	694	1498	771	351	738	864	527	615	58	179	1115	1140	3192	575	277	380	318	268	514	188	295	1111	554	297	233	71
ENSG00000089639	20	97	63	91	28	89	54	35	75	55	31	70	39	35	2	11	3	20	28	0	26	119	31	24	39	10	171	61	29	51	85	87	116
ENSG00000089682	1	177	18	106	31	31	56	61	48	98	29	1	42	57	33	0	9	45	2	0	22	75	7	20	17	44	7	16	19	81	1	9	0
ENSG00000089685	0	120	0	0	3	1	3	0	0	0	19	0	35	3	0	0	0	53	0	2	6	2	0	5	0	36	1	1	3	7	1	0	0
ENSG00000089692	0	0	0	0	0	0	0	0	10	0	0	0	13	0	1	0	0	9	13	0	4	12	0	0	2	0	1	0	0	2	0	0	0
ENSG00000089693	22	268	7	98	91	51	117	124	189	135	52	91	72	99	51	2	2	156	164	597	64	221	126	41	30	90	98	65	190	77	24	100	15
ENSG00000089723	0	58	0	25	20	0	1	0	0	0	21	1	6	14	8	0	10	7	12	0	17	71	7	1	9	20	5	0	31	8	59	10	1
ENSG00000089737	62	1716	109	444	165	196	328	306	304	120	281	270	150	148	179	7	25	297	134	1139	150	222	279	125	80	207	87	136	309	258	52	75	54
ENSG00000089775	0	23	0	92	3	3	25	64	26	0	8	21	2	25	4	0	0	43	0	2	10	11	1	12	0	4	0	1	15	12	1	0	0
ENSG00000089818	0	184	2	28	34	23	10	113	21	10	11	2	25	166	8	2	0	52	23	65	10	20	1	20	32	12	10	9	38	28	60	38	0
ENSG00000089820	2	166	32	156	32	57	46	38	102	40	52	44	66	1	14	11	1	48	16	228	75	131	11	20	35	7	170	67	26	47	69	201	27
ENSG00000089876	69	538	1	241	96	36	191	163	99	243	62	4	99	243	45	9	21	101	141	3	66	90	104	42	35	102	28	42	197	115	67	5	3
ENSG00000089902	49	484	111	245	153	113	95	270	242	82	256	79	78	129	81	27	32	202	118	532	121	220	66	87	58	93	152	156	177	88	176	159	41
ENSG00000089916	24	491	36	244	101	102	171	160	107	107	115	49	100	38	42	3	1	264	39	197	49	129	55	20	69	111	118	70	95	75	60	79	14
ENSG00000090006	2	0	13	27	42	26	73	19	72	10	35	0	32	11	26	1	11	34	49	1	45	1	37	15	15	29	0	31	136	14	1	1	4
ENSG00000090013	15	671	11	185	120	69	193	176	171	84	160	156	115	145	126	4	59	354	208	601	145	114	86	105	78	167	55	92	111	114	119	66	19
ENSG00000090020	28	198	14	71	51	36	45	9	52	23	7	28	45	44	38	14	0	89	183	405	73	80	1	3	27	58	30	1	70	19	65	47	6
ENSG00000090054	0	283	13	66	25	4	28	28	78	0	18	21	14	3	5	0	23	66	60	0	7	62	1	6	10	34	44	19	60	29	2	1	0
ENSG00000090060	336	2072	80	1065	364	212	636	621	781	515	357	343	448	358	348	33	43	817	666	3042	488	441	318	233	207	349	498	297	635	418	237	313	56
ENSG00000090061	5	419	6	115	78	70	131	97	174	77	71	148	86	11	106	1	61	125	153	829	112	102	35	36	26	114	56	36	109	59	39	63	23
ENSG00000090097	4	81	0	26	26	42	48	4	63	68	6	1	12	1	23	0	0	113	20	232	30	1	75	11	1	39	1	0	78	14	3	9	0
ENSG00000090104	0	99	28	9	30	29	8	0	18	25	45	4	35	59	12	11	1	31	1	0	51	164	23	34	3	12	34	15	8	31	0	63	0
ENSG00000090238	16	769	67	281	106	112	78	47	165	53	40	200	63	108	45	60	18	92	193	904	101	245	117	38	52	40	264	66	189	78	143	283	91
ENSG00000090263	5	268	17	183	71	60	149	297	38	395	118	173	103	127	83	0	33	147	152	696	110	34	137	58	53	88	31	74	92	91	166	7	12
ENSG00000090266	58	919	40	183	100	86	184	296	277	424	159	72	159	106	174	4	65	391	344	856	134	162	163	76	123	214	26	127	200	139	36	51	7
ENSG00000090273	60	662	57	300	86	67	267	241	117	190	101	218	91	130	207	6	8	173	311	987	141	73	16	45	45	94	30	101	132	170	3	29	4
ENSG00000090316	28	453	37	288	66	60	127	143	180	100	129	180	123	122	54	23	95	158	134	128	163	280	81	64	25	103	218	105	195	101	54	194	17
ENSG00000090339	13	28	13	110	13	39	14	1	34	3	14	35	25	1	4	25	4	22	14	1	106	65	21	23	92	11	356	50	8	50	81	343	50
ENSG00000090372	7	141	1	49	39	15	51	28	37	1	17	54	60	3	28	16	1	29	34	274	54	1	26	5	16	10	26	12	53	16	97	30	1
ENSG00000090376	122	1218	64	188	59	97	191	169	387	110	124	212	199	147	101	14	51	297	288	679	108	230	46	83	184	109	311	131	175	186	2	95	25
ENSG00000090382	89	527	74	219	239	182	205	229	334	666	150	380	189	248	187	30	16	359	406	2489	273	584	145	164	253	228	188	343	90	162	108	917	12
ENSG00000090432	60	463	18	82	38	40	69	68	160	58	63	77	61	25	31	0	2	118	94	417	102	71	92	19	15	54	11	53	84	114	3	45	1
ENSG00000090447	0	22	2	51	0	0	42	38	11	0	11	72	38	0	6	0	0	16	64	173	3	9	1	10	0	14	0	0	1	4	2	3	6
ENSG00000090470	69	152	11	64	34	45	88	47	93	61	50	67	43	132	42	11	2	139	129	94	59	2	39	23	17	43	5	22	138	21	3	20	1
ENSG00000090487	94	610	22	108	38	43	151	63	99	132	34	82	59	148	84	6	4	143	239	316	141	31	113	38	33	98	130	45	223	44	62	42	10
ENSG00000090512	0	0	0	0	7	0	0	0	0	0	16	0	0	0	0	0	0	0	0	0	0	13	0	1	0	12	0	0	0	0	0	0	0
ENSG00000090520	111	1528	26	399	240	131	381	315	741	269	294	195	256	98	190	1	75	678	281	1520	167	288	167	119	91	258	110	117	330	197	229	122	65
ENSG00000090530	10	21	0	3	10	5	26	1	28	51	9	1	5	1	3	0	1	30	0	0	0	1	14	11	2	0	3	23	0	1	0	1	0
ENSG00000090554	11	92	0	1	9	0	0	0	1	0	0	0	6	0	0	0	0	0	0	0	0	1	1	0	0	0	0	0	0	0	1	1	2
ENSG00000090565	0	0	0	21	1	13	12	19	0	58	31	0	30	0	9	20	0	53	18	0	18	9	1	2	1	11	1	0	45	16	0	6	2
ENSG00000090581	19	226	6	143	57	38	66	27	32	139	19	73	76	237	34	9	2	127	56	227	79	60	105	49	15	34	30	41	91	50	2	30	52
ENSG00000090612	0	392	0	4	13	15	28	28	24	5	21	2	60	30	30	0	22	88	10	158	13	43	19	4	14	10	1	7	35	14	0	9	12
ENSG00000090615	39	1000	43	264	161	142	332	221	401	436	107	182	244	224	124	0	71	436	398	1135	232	166	244	74	56	140	59	121	304	125	113	56	24
ENSG00000090621	103	1116	57	438	289	151	260	345	505	280	209	17	142	304	181	17	71	532	567	1259	198	283	170	165	62	234	71	197	354	90	226	107	3
ENSG00000090659	14	5	0	0	5	5	9	0	4	0	16	23	0	0	0	0	0	1	0	0	6	3	0	0	5	0	0	0	5	1	0	0	1
ENSG00000090661	2	0	0	24	16	3	3	0	0	0	0	0	0	44	10	2	0	9	8	0	33	42	3	9	7	12	5	2	1	6	0	0	1
ENSG00000090674	5	16	3	9	15	12	36	2	11	1	5	1	23	12	5	9	1	51	13	91	16	112	42	2	7	0	73	29	4	22	21	68	16
ENSG00000090686	45	623	124	340	152	117	155	204	348	111	137	171	108	161	162	3	18	445	194	233	145	78	78	115	45	148	133	112	161	144	5	130	8
ENSG00000090776	0	333	2	65	27	33	26	24	25	109	77	4	85	37	66	0	0	148	143	23	48	6	69	8	5	15	14	19	62	14	59	34	24
ENSG00000090857	26	525	5	109	38	5	90	131	97	44	87	101	121	5	28	11	1	158	71	201	65	47	75	14	25	78	8	66	195	23	28	2	48
ENSG00000090861	21	225	2	37	74	14	68	61	44	22	32	33	3	56	12	1	6	47	97	265	34	1	96	24	2	72	3	0	21	28	3	3	2
ENSG00000090863	69	910	115	227	160	93	192	162	190	213	70	239	266	289	142	7	15	214	208	952	99	176	257	67	63	64	79	69	199	109	40	41	44
ENSG00000090889	1	0	0	0	10	0	23	0	18	1	0	2	1	0	6	1	0	33	0	0	2	0	1	1	0	13	0	0	0	4	28	0	1
ENSG00000090905	14	946	41	464	284	129	302	251	352	161	161	169	270	325	169	32	60	426	440	920	160	79	230	89	72	120	55	71	387	106	62	52	102
ENSG00000090924	0	42	32	70	19	9	24	10	1	2	27	0	0	0	6	27	9	31	8	1	8	41	1	2	13	14	43	11	24	2	0	55	2
ENSG00000090971	2	126	0	223	9	12	35	22	12	125	2	22	29	1	34	0	9	22	30	301	35	27	1	10	10	16	18	26	32	60	3	0	1
ENSG00000090975	1	0	0	0	4	2	0	1	4	0	1	0	0	1	1	11	0	7	1	0	0	11	0	6	1	7	1	0	1	0	0	1	0
ENSG00000090989	116	1011	10	489	284	156	306	309	349	455	258	89	301	175	243	16	42	460	392	885	170	265	180	120	127	126	77	107	247	236	144	132	84
ENSG00000091009	0	373	0	17	52	20	82	7	30	180	22	115	88	22	20	1	0	82	26	533	35	25	27	35	20	50	27	24	64	54	2	9	1
ENSG00000091039	74	968	70	443	199	200	154	250	287	359	179	379	276	281	182	68	39	322	211	1124	172	459	63	128	132	186	510	249	230	179	279	570	208
ENSG00000091073	181	2993	139	722	374	318	836	664	1171	794	363	330	519	221	394	49	186	931	1192	2556	754	529	748	286	245	447	277	158	1605	508	286	323	67
ENSG00000091106	2	0	36	106	3	11	0	0	1	0	0	0	0	0	2	3	0	0	0	1	0	76	15	8	4	2	119	64	0	0	1	79	0
ENSG00000091127	1	16	1	16	2	21	7	0	11	0	8	1	0	0	10	0	0	43	45	76	1	0	0	19	3	18	1	6	32	8	3	9	1
ENSG00000091128	0	0	0	0	11	0	0	6	0	0	0	0	0	0	7	0	0	0	0	0	2	0	0	0	0	0	1	0	0	0	0	0	0
ENSG00000091129	0	0	0	0	0	0	17	0	6	1	1	0	5	0	0	0	0	2	0	0	0	1	1	0	0	2	9	1	1	0	0	0	0
ENSG00000091136	40	107	4	1	21	14	1	0	47	0	14	2	0	1	25	0	2	59	15	1	8	1	43	9	0	35	2	14	9	5	6	5	1
ENSG00000091137	45	3011	1	35	238	2	141	176	743	50	131	375	324	98	25	1	131	10	154	1	263	81	4	8	757	234	142	25	146	109	20	9	4
ENSG00000091140	120	767	31	211	163	72	198	144	288	452	173	268	222	170	115	18	3	164	228	327	115	134	121	103	50	172	49	124	210	110	94	54	26
ENSG00000091157	1	63	6	46	36	16	33	4	36	3	30	25	28	0	23	2	0	75	62	0	33	130	2	31	16	32	10	42	48	27	0	0	0
ENSG00000091164	22	869	8	77	114	53	81	64	147	178	54	67	125	189	75	0	45	99	126	745	95	73	55	30	72	185	31	43	167	41	6	14	3
ENSG00000091181	41	1	22	75	3	4	48	55	0	79	0	49	0	0	19	0	2	0	1	276	10	0	0	2	0	16	1	2	0	4	1	3	0
ENSG00000091262	0	0	0	3	1	6	10	0	0	0	0	0	0	1	1	0	0	0	0	1	0	0	0	0	0	0	0	10	0	0	0	0	0
ENSG00000091317	288	4141	481	2806	750	847	1027	849	1539	1832	869	1377	1059	1311	870	241	111	1671	1626	2961	950	1775	702	635	806	1279	3205	1098	1496	801	1221	2016	482
ENSG00000091409	90	499	54	421	90	162	142	100	464	168	522	50	216	116	152	2	5	477	134	14	99	76	103	100	16	139	54	258	182	80	6	142	26
ENSG00000091436	1	47	10	40	10	34	58	114	21	18	44	66	15	45	45	1	12	42	72	3	49	10	67	19	27	59	127	23	51	60	37	63	32
ENSG00000091482	1	0	3	12	1	2	0	6	1	0	0	0	22	0	4	0	9	5	2	0	0	0	0	0	0	0	0	3	1	9	0	0	0
ENSG00000091483	2	166	16	42	38	17	101	24	60	21	33	25	71	0	8	0	0	63	129	127	59	7	4	12	16	48	2	12	37	33	49	10	1
ENSG00000091490	142	673	24	375	110	118	270	180	367	375	46	218	150	84	150	0	38	547	792	1414	296	84	189	158	87	183	69	59	237	202	106	21	11
ENSG00000091513	4	129	2	0	9	20	5	2	6	0	27	211	19	1	11	0	2	43	28	2	39	5	16	2	4	8	4	25	46	1	2	31	5
ENSG00000091527	169	1342	83	691	185	229	351	315	618	701	306	420	201	390	332	63	76	552	501	773	261	294	228	198	148	267	191	161	382	286	261	178	44
ENSG00000091536	0	55	0	1	0	0	1	0	0	28	0	0	0	13	0	9	0	1	0	0	0	6	0	2	3	0	0	7	0	2	1	15	30
ENSG00000091542	19	512	11	204	78	41	214	181	156	315	58	244	84	83	82	2	41	247	251	1006	204	83	332	62	45	54	55	50	193	111	195	51	42
ENSG00000091592	1	174	29	192	32	48	46	68	57	42	8	88	26	1	20	15	44	39	30	434	23	30	30	25	9	16	116	50	9	43	32	86	16
ENSG00000091622	3	465	1	184	75	68	83	186	83	176	89	165	70	73	67	0	27	157	160	612	81	48	48	33	12	62	9	61	113	7	7	14	7
ENSG00000091640	66	1058	24	459	121	108	365	512	436	537	234	182	326	176	274	25	50	524	615	1956	160	363	259	145	177	172	148	188	395	183	102	143	94
ENSG00000091651	1	59	1	6	3	3	27	1	43	0	44	0	0	0	1	0	1	43	0	1	1	0	0	0	0	1	1	1	0	2	0	0	1
ENSG00000091656	2	1	0	69	1	4	25	0	19	24	1	1	13	1	0	0	26	41	25	200	19	2	0	1	2	1	0	14	2	7	0	0	1
ENSG00000091732	0	39	1	63	2	4	28	14	49	34	7	1	24	79	1	0	33	18	19	2	23	0	42	1	0	6	0	19	18	12	8	16	0
ENSG00000091831	3	11	13	9	16	11	27	8	1	37	25	0	0	0	22	0	1	32	60	1	29	2	12	5	0	2	2	13	9	5	0	0	1
ENSG00000091844	0	17	1	0	14	7	19	13	0	1	6	52	0	0	9	0	0	30	63	0	5	0	0	2	3	24	0	19	1	6	1	0	18
ENSG00000091947	12	213	14	18	43	41	79	33	149	104	36	72	63	45	28	2	7	130	101	73	67	31	46	43	22	57	24	34	63	41	107	6	24
ENSG00000091986	233	2330	195	826	533	483	615	1044	655	1119	159	1082	203	826	834	9	105	756	1243	1574	807	177	664	289	236	316	59	416	1263	514	36	117	48
ENSG00000092010	185	2313	97	391	209	223	374	429	441	435	224	231	401	199	276	30	48	565	406	1345	246	253	254	258	253	183	590	295	468	311	180	245	155
ENSG00000092020	4	709	63	273	83	73	116	136	145	6	87	198	109	48	94	14	29	285	104	4	113	64	105	113	36	138	142	80	113	189	158	102	47
ENSG00000092036	0	44	13	33	24	12	33	37	27	0	16	4	7	14	18	1	15	55	33	147	19	18	46	8	17	55	38	7	8	3	1	0	1
ENSG00000092067	0	2	0	2	1	0	0	1	0	0	18	0	0	0	0	0	0	0	0	0	0	29	0	0	1	2	13	8	0	0	0	8	0
ENSG00000092068	3	92	2	87	23	38	174	29	220	91	9	48	100	82	102	2	24	196	164	725	132	64	71	32	32	80	12	65	48	58	45	18	12
ENSG00000092094	0	197	0	51	12	12	20	46	31	221	19	2	13	54	9	0	12	36	24	301	22	7	35	10	21	9	14	14	31	22	2	2	0
ENSG00000092096	0	0	0	0	7	0	1	0	0	0	0	0	0	0	0	0	0	0	6	0	0	0	32	0	0	0	0	0	0	0	0	15	0
ENSG00000092098	0	0	10	4	0	0	0	0	0	0	0	0	0	0	0	0	0	0	0	6	0	0	0	4	0	0	0	0	0	0	0	0	0
ENSG00000092108	54	319	26	207	117	60	121	229	203	236	93	71	146	103	98	1	8	173	186	449	93	89	95	62	73	127	36	43	133	131	5	22	5
ENSG00000092140	13	3	6	13	49	43	72	67	48	258	75	3	22	0	13	0	14	67	53	369	36	69	1	13	20	43	10	23	30	11	4	39	0
ENSG00000092148	175	2547	82	1554	709	355	781	677	647	1092	515	698	579	266	394	47	163	872	770	1971	418	417	362	303	263	428	211	309	981	454	184	179	19
ENSG00000092199	161	1804	112	945	308	292	452	424	530	403	404	372	556	152	238	78	43	370	303	1227	299	410	129	285	254	304	610	425	356	307	241	255	155
ENSG00000092200	0	0	0	23	0	0	0	0	0	0	1	0	0	0	0	0	0	0	0	0	0	0	0	0	0	0	17	0	0	0	0	0	0
ENSG00000092201	63	1039	83	415	313	102	264	465	451	255	335	191	281	231	228	2	83	400	280	472	162	315	209	127	73	249	49	126	295	191	105	103	13
ENSG00000092203	86	588	90	209	183	131	243	106	303	287	134	274	163	123	118	28	35	262	238	424	221	358	200	85	69	144	189	159	149	164	4	213	109
ENSG00000092208	1	53	0	25	1	2	6	17	11	0	2	33	20	1	6	0	0	25	4	9	9	0	20	5	0	0	0	3	22	0	2	0	1
ENSG00000092295	0	30	11	50	22	4	37	11	24	171	72	3	21	24	18	0	22	128	103	106	51	28	34	19	3	6	9	38	15	25	0	2	61
ENSG00000092330	19	295	5	71	33	22	13	34	11	1	62	46	90	54	15	1	17	108	98	192	88	46	2	7	4	33	77	34	64	36	85	56	0
ENSG00000092377	0	0	0	9	0	0	0	0	0	0	0	0	0	0	0	0	0	0	0	0	0	0	0	0	8	3	0	3	0	5	0	0	0
ENSG00000092421	1	0	3	0	6	11	0	29	10	0	10	34	5	0	3	1	0	15	0	0	1	0	0	0	0	14	5	5	0	0	52	1	1
ENSG00000092439	2	193	4	136	99	59	153	185	144	148	104	4	47	49	100	5	1	161	228	135	66	130	55	58	45	81	38	37	179	64	7	19	5
ENSG00000092445	0	13	15	10	49	8	19	26	21	1	4	0	4	28	20	17	8	41	23	76	45	0	26	9	7	19	3	4	28	21	0	0	25
ENSG00000092470	0	65	1	16	1	2	8	0	24	0	8	0	0	0	14	0	0	26	0	2	4	0	1	1	1	4	1	0	3	0	0	1	0
ENSG00000092531	7	486	14	192	64	97	184	147	127	228	48	46	171	53	94	1	15	106	148	17	42	126	19	27	59	98	177	74	111	95	34	173	128
ENSG00000092621	19	17	1	32	1	1	11	0	16	0	9	0	0	2	1	0	2	9	40	1	0	0	0	5	0	3	1	1	3	0	0	0	0
ENSG00000092758	2	1	0	2	2	0	2	4	0	0	0	0	0	0	18	5	2	2	0	4	1	26	1	0	2	1	13	0	2	3	0	15	0
ENSG00000092820	572	7650	438	3782	1625	1186	2115	2145	1967	2806	1393	1724	1476	2550	1157	46	295	1913	2649	8361	1799	1877	1109	844	327	1068	662	902	2400	1739	637	406	250
ENSG00000092841	250	4115	267	1831	745	600	738	1224	1513	724	1019	607	1231	1107	494	148	154	798	946	3513	631	1579	404	546	615	917	1450	1322	1022	686	608	1054	141
ENSG00000092847	6	394	26	95	43	30	65	67	63	223	40	81	60	67	29	0	0	103	82	2	15	30	40	35	27	41	56	33	31	7	10	25	28
ENSG00000092850	1	0	2	110	1	0	22	16	0	46	0	0	0	0	0	1	0	12	10	98	5	0	0	6	0	1	0	4	0	0	0	11	0
ENSG00000092853	1	64	3	0	16	2	4	2	3	0	27	0	14	1	2	0	0	31	0	0	18	11	0	1	4	8	1	11	2	8	0	11	0
ENSG00000092871	44	243	19	117	54	38	66	25	51	250	91	58	59	164	14	1	1	41	131	265	46	64	31	31	31	43	89	36	56	12	2	65	21
ENSG00000092929	2	184	17	129	14	19	2	14	26	0	53	22	25	4	1	50	2	21	0	1	39	73	18	16	25	1	87	26	21	14	46	61	20
ENSG00000092931	18	111	21	82	34	84	81	23	106	92	25	59	63	0	55	2	7	118	105	452	77	90	61	13	54	61	34	47	104	20	2	2	18
ENSG00000092964	1	3	5	8	2	0	0	2	102	0	12	1	45	2	38	0	2	41	2	2	5	19	42	5	1	8	17	13	2	0	29	34	0
ENSG00000092969	4	380	5	32	38	30	71	66	86	0	28	22	41	0	30	23	2	126	194	3	28	27	35	35	1	39	23	31	220	42	2	8	1
ENSG00000092978	11	624	15	226	61	35	158	108	85	131	65	223	55	100	62	1	1	112	52	682	15	21	38	35	8	44	19	27	71	77	2	61	2
ENSG00000093000	135	646	70	592	174	203	288	225	325	616	178	136	332	192	130	0	8	240	216	962	301	256	52	82	56	159	160	148	237	188	161	130	8
ENSG00000093010	30	774	3	159	52	53	140	77	138	122	60	10	128	295	83	30	17	246	451	1291	174	104	273	39	38	107	46	55	184	54	8	47	4
ENSG00000093072	13	72	12	3	2	12	46	36	40	0	19	13	65	10	9	0	0	35	37	127	12	14	45	6	23	16	0	24	3	4	0	1	1
ENSG00000093134	24	102	29	297	31	59	19	208	66	1	61	190	1	0	25	34	19	19	87	39	114	299	1	48	68	12	377	142	44	69	94	207	112
ENSG00000093144	63	489	17	231	93	106	135	228	257	387	106	94	125	126	75	22	7	152	167	3	64	77	24	89	48	105	123	67	151	97	72	180	1
ENSG00000093167	76	233	33	81	156	132	158	191	165	243	165	79	183	199	83	38	3	163	206	378	131	168	48	111	38	89	52	65	199	99	2	61	41
ENSG00000093183	3	72	7	3	1	40	43	12	8	65	7	2	15	9	28	0	1	91	92	1	8	42	43	13	5	27	21	24	2	21	1	3	2
ENSG00000093217	0	0	0	24	2	0	0	0	2	0	4	0	6	46	10	4	1	7	2	0	1	0	1	0	0	1	0	3	17	0	1	0	0
ENSG00000094631	3	206	1	93	78	20	58	96	116	1	50	83	76	12	22	19	28	109	97	220	79	61	26	23	27	59	20	22	74	61	145	7	25
ENSG00000094755	34	3266	30	517	573	171	564	373	353	620	329	182	165	347	293	5	115	853	1158	1340	419	419	376	101	125	775	58	131	363	153	193	59	11
ENSG00000094804	0	196	3	26	20	5	21	14	2	95	17	0	0	0	1	0	1	2	0	0	4	15	12	0	2	14	11	31	4	1	1	1	0
ENSG00000094841	56	166	0	70	41	15	40	63	62	124	31	148	42	52	51	0	7	75	51	170	18	4	1	26	26	42	2	42	38	24	1	7	3
ENSG00000094880	0	126	3	53	30	11	46	53	95	105	3	1	56	94	38	1	1	67	103	253	27	34	50	12	16	45	4	5	134	31	1	6	0
ENSG00000094914	2	0	0	44	6	4	17	28	6	0	10	0	0	0	12	0	0	18	21	0	0	0	0	8	0	1	6	0	0	7	0	0	3
ENSG00000094916	83	658	17	394	133	75	356	216	223	293	81	332	90	196	147	0	101	247	196	1546	136	39	107	75	39	180	10	77	176	49	14	17	9
ENSG00000094963	1	426	26	202	159	52	389	78	266	249	249	56	61	6	270	22	25	71	36	3	69	252	58	47	73	372	63	110	101	77	40	23	7
ENSG00000094975	3	561	59	179	75	70	193	211	261	136	70	150	124	161	107	9	27	241	350	190	72	159	57	58	95	77	193	86	111	69	6	76	3
ENSG00000095002	1	249	2	31	22	34	37	9	11	46	32	1	26	0	33	0	32	66	11	3	20	11	39	3	8	23	2	9	4	1	3	1	0
ENSG00000095015	88	1007	51	255	125	134	164	231	220	347	123	71	129	259	136	12	13	236	231	761	29	354	142	61	98	118	252	138	242	192	126	204	89
ENSG00000095059	6	116	1	40	5	30	15	5	57	59	16	4	26	39	18	0	2	35	3	20	18	35	5	9	4	15	9	22	25	17	0	14	4
ENSG00000095066	10	318	2	193	67	44	59	100	49	36	50	1	54	82	46	10	14	92	104	553	108	181	164	30	29	61	51	46	132	6	64	20	3
ENSG00000095139	55	744	44	136	92	53	193	135	174	314	118	73	132	38	103	0	25	196	338	278	66	123	68	35	34	73	48	73	195	110	123	28	12
ENSG00000095203	0	261	4	325	60	73	152	202	162	311	35	76	84	206	24	2	11	90	200	496	37	2	147	44	64	91	28	33	112	62	6	11	2
ENSG00000095209	2	11	2	14	15	16	10	17	14	52	5	2	0	0	12	1	0	37	31	79	28	37	33	9	4	2	5	22	5	3	1	2	0
ENSG00000095261	13	270	2	44	30	20	81	30	48	139	60	4	86	94	38	0	15	72	72	347	74	9	38	22	16	15	16	9	132	31	2	2	1
ENSG00000095303	0	0	8	1	1	10	0	0	32	0	9	0	0	0	0	2	1	18	0	0	4	5	0	0	17	0	26	28	10	0	0	35	0
ENSG00000095319	1	210	1	16	54	7	25	19	72	1	39	1	14	2	8	1	0	119	84	72	57	25	7	16	14	49	3	7	116	34	16	7	36
ENSG00000095321	1	175	1	27	10	16	13	4	21	1	28	29	2	25	19	2	0	39	20	41	22	0	26	22	20	39	3	4	18	2	0	0	1
ENSG00000095370	1	0	3	40	1	0	3	0	0	163	0	0	0	0	0	13	0	0	0	1	1	8	17	0	9	1	13	2	0	3	0	85	28
ENSG00000095380	17	635	16	231	105	35	143	169	259	66	100	104	91	77	61	12	50	223	264	877	181	70	9	74	60	195	100	78	125	131	71	58	34
ENSG00000095383	21	304	5	35	25	21	38	4	146	1	28	43	10	58	22	2	0	82	9	57	21	41	30	23	8	4	4	6	24	24	1	22	0
ENSG00000095397	2	89	1	30	5	26	17	13	1	115	1	0	0	35	7	1	1	19	46	29	35	0	28	6	0	10	7	7	12	29	1	2	1
ENSG00000095485	2	43	0	5	7	8	11	18	2	39	6	44	3	83	16	0	0	24	68	0	22	0	18	16	12	3	4	6	72	15	0	8	2
ENSG00000095539	0	41	0	9	0	5	0	2	1	0	0	0	0	1	13	0	35	8	0	1	9	0	0	0	0	0	4	0	17	0	0	0	0
ENSG00000095564	63	414	20	184	50	68	167	55	152	146	59	80	39	53	55	2	2	94	51	238	59	19	14	15	40	66	15	39	113	47	2	23	3
ENSG00000095574	19	59	0	35	38	29	62	45	1	3	4	128	11	7	18	0	0	56	47	63	1	35	18	28	20	36	10	14	48	14	1	20	5
ENSG00000095585	13	146	2	22	38	2	51	45	73	44	14	0	34	35	12	0	0	32	92	0	7	6	21	5	5	34	15	5	36	14	1	4	0
ENSG00000095587	0	0	0	0	0	1	0	0	0	0	6	0	0	0	0	5	0	0	0	0	0	0	0	1	0	0	4	0	0	0	39	1	1
ENSG00000095596	1	177	0	4	86	31	15	45	6	225	17	0	25	4	34	0	1	49	13	31	26	3	3	10	3	30	1	4	44	20	1	9	0
ENSG00000095627	0	0	0	10	2	3	6	0	0	49	0	3	0	0	0	7	0	12	2	0	0	0	9	5	0	10	0	0	0	4	0	0	0
ENSG00000095637	1	0	0	0	1	20	10	0	27	69	7	1	0	0	6	0	0	15	15	84	16	0	0	1	2	1	4	0	9	16	1	1	1
ENSG00000095739	13	259	0	83	21	35	77	69	40	71	1	95	22	10	11	13	10	96	46	31	25	0	20	10	6	25	10	1	19	40	2	0	24
ENSG00000095752	1	99	1	0	1	22	0	0	6	0	0	0	15	0	0	0	8	23	0	1	0	41	23	0	0	0	0	9	0	6	1	14	0
ENSG00000095787	92	866	166	655	278	192	374	346	442	468	317	380	275	339	203	76	71	430	621	908	438	380	222	194	178	299	763	285	402	179	222	482	75
ENSG00000095794	23	6	37	376	84	97	43	38	87	230	70	349	32	72	39	69	57	141	80	2	67	433	22	124	186	84	753	342	98	76	219	797	161
ENSG00000095906	13	593	2	38	52	69	90	44	113	59	40	97	94	217	30	7	48	149	76	319	53	93	43	25	24	40	37	35	143	82	136	12	2
ENSG00000095951	2	445	19	231	49	114	156	43	153	11	72	1	95	76	48	4	15	154	112	167	95	154	56	53	52	56	153	41	26	22	3	84	8
ENSG00000095970	37	202	0	13	5	31	17	0	31	0	25	2	4	109	19	0	2	35	1	0	66	122	33	24	47	2	11	14	1	12	3	38	0
ENSG00000096006	0	0	0	0	0	13	0	0	0	0	0	0	20	0	0	0	0	0	0	1	7	1	0	0	9	0	0	16	0	0	0	9	8
ENSG00000096060	4	166	36	126	31	33	44	55	19	84	50	42	21	73	26	11	2	76	87	674	41	110	69	94	22	74	143	37	46	46	90	130	76
ENSG00000096063	57	280	43	211	67	60	155	106	142	278	113	143	56	128	83	6	35	232	152	76	47	154	48	53	41	80	225	107	148	56	39	78	77
ENSG00000096070	1	58	1	64	44	40	67	22	31	164	25	0	5	8	18	36	45	34	99	478	35	28	20	9	8	2	3	4	43	11	3	23	7
ENSG00000096080	14	556	28	54	69	47	81	80	155	50	144	33	71	103	46	1	19	116	26	232	75	50	70	38	32	39	27	72	165	64	36	58	18
ENSG00000096092	3	18	1	79	73	18	179	166	159	397	31	40	182	147	83	2	6	238	273	1141	67	24	158	29	24	130	4	37	144	61	3	3	2
ENSG00000096093	15	116	2	603	45	26	258	214	15	393	29	50	2	62	85	0	1	96	180	765	126	3	30	35	4	63	15	30	41	101	5	7	1
ENSG00000096384	586	9680	490	3743	1249	953	2724	2713	4572	2680	2539	1437	1626	1383	2070	111	353	3743	3748	9423	2286	1540	1684	1002	498	1520	503	1254	1984	1785	1388	585	172
ENSG00000096401	83	349	50	409	109	93	123	175	282	196	121	132	130	119	90	16	22	286	136	570	44	261	5	60	35	94	118	75	136	54	199	87	21
ENSG00000096433	57	1475	44	252	114	110	159	122	191	127	89	30	155	93	161	23	31	303	377	935	304	55	196	59	70	83	56	28	337	64	54	19	32
ENSG00000096654	0	0	0	0	18	4	18	11	0	0	7	0	8	1	14	0	0	7	0	0	0	15	0	2	3	0	9	0	0	0	0	5	0
ENSG00000096696	209	4779	390	1697	1183	598	1063	914	1764	1282	1906	904	893	852	848	41	97	1602	903	3288	688	1391	559	337	290	846	404	869	1272	798	780	295	123
ENSG00000096717	13	109	4	52	27	41	13	43	55	81	10	1	69	0	11	0	1	49	61	6	1	24	16	10	6	20	41	34	54	29	54	11	1
ENSG00000096746	31	581	6	351	164	139	165	301	295	276	125	320	118	96	155	41	91	389	390	1228	166	401	242	111	58	121	272	75	226	150	8	293	23
ENSG00000096872	20	367	20	138	11	13	122	140	30	305	5	149	4	53	29	0	16	28	28	936	37	1	0	36	22	8	7	38	11	53	7	6	3
ENSG00000096968	15	176	38	60	40	58	112	83	93	130	55	39	56	3	37	0	31	56	62	118	16	70	19	28	62	16	70	31	87	104	8	35	7
ENSG00000096996	0	0	0	0	0	0	0	0	0	0	0	1	0	0	1	0	0	3	0	0	0	24	0	5	5	0	0	0	1	7	0	7	0
ENSG00000097007	7	607	8	118	57	44	177	63	142	282	33	67	147	148	96	1	35	333	346	1104	179	68	164	20	42	81	21	19	195	65	85	35	18
ENSG00000097021	23	2	1	7	13	1	18	0	1	0	6	0	23	59	1	0	0	16	1	22	3	6	14	1	4	3	4	1	65	21	0	0	0
ENSG00000097033	46	1009	65	517	251	202	315	207	318	189	308	202	203	361	177	56	80	391	417	1114	136	200	103	138	112	241	379	133	324	184	225	202	93
ENSG00000097046	0	26	0	0	15	0	5	0	0	0	17	1	0	0	0	1	0	0	0	66	0	0	6	0	1	9	7	5	2	4	0	0	0
ENSG00000097096	0	92	0	0	5	12	18	1	3	0	1	0	2	51	19	0	1	0	24	180	0	17	1	10	7	0	4	0	0	9	2	8	0
ENSG00000099139	0	158	0	136	29	17	38	102	24	114	48	86	25	4	28	0	29	13	141	166	45	77	37	6	5	25	7	4	88	21	2	9	2
ENSG00000099194	22	588	3	76	75	39	115	67	292	5	52	45	155	92	50	16	27	238	263	641	109	33	92	17	36	106	50	60	249	64	103	26	44
ENSG00000099203	14	168	7	112	24	17	49	55	44	1	43	10	15	16	36	1	1	82	64	299	21	19	34	12	11	6	4	37	20	19	34	43	0
ENSG00000099204	306	4098	103	1004	597	346	802	421	718	572	360	317	601	547	279	88	78	893	1076	2622	575	371	345	258	183	397	98	280	979	410	259	97	49
ENSG00000099219	55	783	17	151	136	60	125	241	166	388	115	42	245	68	88	6	45	244	267	559	226	4	43	52	19	208	7	45	103	56	1	31	11
ENSG00000099246	112	1074	16	272	199	138	328	223	240	263	205	86	285	402	198	4	132	476	295	784	271	129	144	116	112	178	112	85	226	170	230	120	8
ENSG00000099250	1	192	5	1	6	42	50	21	51	0	21	2	1	0	2	19	15	44	15	1	0	24	0	3	27	11	7	12	21	6	0	0	0
ENSG00000099251	0	0	0	0	0	2	10	23	6	0	0	0	0	0	0	2	0	5	1	1	0	0	0	0	0	1	0	0	0	0	0	1	0
ENSG00000099260	0	42	22	94	4	4	19	41	7	1	63	38	0	16	15	0	0	19	26	143	13	1	1	8	2	11	5	20	17	37	0	35	53
ENSG00000099282	0	2	0	99	17	13	22	44	130	177	5	4	26	87	89	25	6	227	229	381	82	107	62	46	6	58	10	16	48	34	5	30	0
ENSG00000099284	1	16	0	1	1	1	6	5	22	0	4	0	9	1	13	0	0	16	0	0	3	7	8	0	3	11	3	6	0	3	0	1	0
ENSG00000099290	33	143	11	119	59	47	45	45	79	20	22	68	44	0	41	0	17	42	48	41	5	2	12	27	42	42	31	27	187	31	1	12	7
ENSG00000099308	1	32	2	81	1	25	0	14	1	1	0	1	6	43	0	11	6	9	51	1	9	71	0	15	6	0	59	17	2	21	38	37	0
ENSG00000099326	9	11	15	63	4	5	14	19	3	0	23	1	0	25	26	0	0	10	58	227	11	0	0	7	2	2	10	3	17	31	2	1	0
ENSG00000099330	64	343	0	36	14	1	40	10	14	30	7	31	12	0	18	0	0	11	45	279	15	14	0	6	4	22	0	0	6	11	0	2	0
ENSG00000099331	1	480	65	188	95	44	71	47	113	71	89	103	19	29	37	40	5	64	63	220	84	205	5	50	32	88	180	34	79	26	142	103	17
ENSG00000099337	14	461	18	135	107	31	64	27	109	32	99	42	49	107	28	20	0	96	41	220	41	121	74	20	45	77	32	37	41	23	31	39	36
ENSG00000099338	0	90	0	24	2	0	0	0	4	1	6	0	0	0	0	0	0	9	0	44	0	0	0	0	0	12	5	0	0	4	0	0	0
ENSG00000099341	62	1866	56	449	266	188	412	279	391	270	438	221	325	235	171	46	74	612	435	1165	368	174	266	159	126	302	141	141	252	172	196	170	68
ENSG00000099364	1	139	14	51	36	27	72	0	43	1	20	15	18	7	26	13	16	25	69	306	40	9	29	6	10	16	15	16	56	18	7	38	0
ENSG00000099377	2	1	0	0	17	9	2	0	0	0	2	68	1	0	7	0	0	17	6	193	0	1	61	0	25	7	13	1	5	0	1	4	0
ENSG00000099381	29	178	3	60	41	26	51	17	69	1	27	2	42	0	17	1	0	68	45	103	29	85	26	12	3	18	8	42	51	16	2	46	3
ENSG00000099385	0	15	10	22	10	7	19	29	10	105	17	65	14	88	12	1	2	51	11	91	49	7	10	0	14	20	3	5	38	23	0	0	1
ENSG00000099622	116	1519	97	850	289	240	628	566	649	895	364	150	428	375	616	44	120	875	1119	3219	513	402	494	217	240	455	362	245	476	331	358	257	33
ENSG00000099624	1	32	2	12	28	25	40	30	25	3	11	1	41	31	25	0	2	21	45	83	17	33	10	19	8	15	0	7	19	12	0	0	3
ENSG00000099725	2	0	0	85	78	0	0	0	0	180	2	0	0	2	0	0	0	0	0	128	17	29	34	0	26	72	11	27	57	27	1	14	16
ENSG00000099783	146	2370	165	1255	469	223	493	552	833	338	517	645	540	561	463	65	145	974	1040	1869	512	511	301	196	193	416	335	387	556	439	206	173	97
ENSG00000099785	1	109	0	5	13	14	32	36	27	55	2	2	66	22	19	0	21	19	41	75	7	18	7	18	18	40	20	18	31	35	2	19	12
ENSG00000099795	62	1286	47	260	181	106	330	322	290	143	262	292	424	528	163	7	94	319	247	681	68	50	165	153	221	353	62	141	281	223	86	59	7
ENSG00000099797	2	4	0	37	13	1	8	2	16	0	4	0	7	59	15	0	25	31	34	193	38	1	1	8	15	0	2	1	0	0	0	1	15
ENSG00000099800	59	931	33	320	137	94	222	136	334	161	207	199	178	303	107	4	79	394	249	644	178	276	88	112	99	168	37	178	183	163	38	92	13
ENSG00000099804	70	554	5	150	46	70	125	86	102	90	34	76	115	125	73	50	4	95	114	99	56	162	103	31	72	83	129	98	134	36	137	67	73
ENSG00000099810	21	395	26	135	54	64	75	97	71	333	95	3	120	23	21	1	16	165	117	530	81	46	24	32	33	26	14	68	133	50	8	11	2
ENSG00000099812	19	272	0	105	78	63	46	91	161	58	44	2	104	81	34	2	22	66	161	475	102	77	62	17	20	6	11	35	83	33	28	6	1
ENSG00000099814	101	2448	82	547	256	229	514	399	768	1015	174	198	493	389	291	17	152	1054	1174	2111	580	361	1025	118	102	327	41	94	915	198	294	139	9
ENSG00000099817	119	1765	99	707	193	268	682	500	817	678	247	172	316	302	330	42	103	892	605	845	398	328	358	207	199	360	134	163	466	321	263	449	52
ENSG00000099821	1	2	0	4	2	3	18	6	19	0	6	0	21	1	29	0	0	2	45	28	17	0	0	6	1	0	0	10	1	2	2	0	0
ENSG00000099840	1	17	0	109	4	0	63	0	18	0	17	1	19	0	2	0	0	0	20	100	19	1	1	5	12	1	41	35	21	33	57	7	0
ENSG00000099849	9	403	16	111	58	34	116	130	152	227	53	8	91	15	37	0	6	114	267	589	115	13	38	71	39	27	29	41	140	41	1	25	24
ENSG00000099860	67	1071	63	422	235	213	145	99	174	472	84	477	122	120	55	173	355	81	356	479	199	625	208	227	642	59	1822	202	207	152	1038	1488	587
ENSG00000099866	0	0	0	0	0	0	0	0	0	0	4	0	0	0	3	0	1	0	0	0	3	0	0	0	0	0	8	0	0	0	0	20	0
ENSG00000099875	197	1643	114	716	338	337	408	295	544	341	192	352	208	504	182	53	118	538	416	1237	252	480	351	195	133	283	456	186	537	238	392	444	90
ENSG00000099889	1	121	0	0	3	4	19	16	14	14	0	89	18	18	14	1	0	72	24	539	13	2	7	13	6	8	1	4	17	21	2	4	1
ENSG00000099899	0	260	1	40	6	8	35	3	11	1	16	1	9	16	9	1	4	45	46	92	11	62	27	17	9	0	1	1	47	9	0	12	2
ENSG00000099901	22	152	1	45	34	49	65	40	72	265	35	35	64	86	56	0	0	60	68	93	60	23	25	28	28	90	8	64	43	59	73	3	3
ENSG00000099904	1	49	0	52	24	19	64	22	34	96	8	45	50	28	23	0	11	47	92	161	21	0	45	3	10	18	3	7	81	10	4	11	27
ENSG00000099910	15	526	0	25	36	30	90	74	44	5	17	63	19	16	66	0	2	58	54	178	30	0	51	28	18	80	23	16	79	13	0	11	1
ENSG00000099917	41	357	26	65	43	43	38	76	47	60	69	2	43	63	40	0	14	69	161	155	74	9	45	7	13	34	46	19	27	15	19	28	1
ENSG00000099940	25	663	28	112	84	48	120	85	66	109	111	4	112	48	45	4	17	145	273	280	80	144	98	56	40	110	51	47	250	70	11	87	90
ENSG00000099942	20	140	8	25	33	20	49	52	54	173	39	3	20	76	22	0	20	22	55	57	32	22	42	17	15	44	30	17	23	48	180	13	8
ENSG00000099949	0	98	0	6	3	6	1	3	64	0	0	1	6	0	8	1	0	9	0	1	9	28	12	0	5	0	1	0	23	10	0	0	0
ENSG00000099953	0	0	0	0	2	2	0	0	12	0	0	0	0	0	0	0	0	77	9	0	1	0	6	0	0	0	0	0	0	0	0	0	1
ENSG00000099956	2	318	1	105	44	15	38	38	90	0	71	92	102	55	39	2	3	167	66	695	43	2	82	29	28	54	18	7	65	14	5	21	34
ENSG00000099958	0	0	0	0	0	0	0	2	1	0	0	0	1	0	0	0	0	18	11	0	1	0	1	0	6	4	0	4	23	2	0	0	0
ENSG00000099960	0	33	0	21	35	3	12	29	58	0	8	34	24	0	7	2	0	25	16	248	17	34	0	5	6	0	1	1	2	4	0	1	0
ENSG00000099968	35	577	6	180	83	77	144	82	67	191	44	0	101	131	80	2	45	130	261	217	67	38	51	39	26	101	39	45	100	65	187	37	3
ENSG00000099977	26	355	2	200	42	52	66	123	164	115	66	82	148	35	77	0	46	214	169	921	86	75	147	31	59	140	72	95	83	68	113	65	3
ENSG00000099985	38	211	8	382	117	218	8	4	95	305	42	1279	13	4	23	416	204	48	62	4	160	1175	78	106	389	18	1055	232	32	119	1654	1494	767
ENSG00000099991	2	92	8	227	19	17	57	38	53	4	25	17	30	49	43	1	1	85	100	221	63	72	24	35	11	8	54	50	11	37	33	53	2
ENSG00000099992	15	127	2	18	48	3	27	23	40	0	24	20	26	21	17	0	28	141	147	299	107	87	46	13	8	39	4	14	26	3	4	22	1
ENSG00000099994	0	0	0	0	0	0	0	0	10	0	2	1	0	0	7	0	1	10	0	1	0	2	13	0	2	0	1	0	0	3	0	0	0
ENSG00000099995	64	624	33	264	87	146	139	148	255	93	51	269	192	122	133	32	13	376	253	908	97	112	100	130	47	108	110	64	249	107	220	218	96
ENSG00000099999	0	5	0	0	7	14	9	0	11	30	7	0	15	17	9	1	11	23	0	0	9	0	0	0	0	11	0	1	19	1	0	1	1
ENSG00000100003	0	210	0	5	25	40	0	9	37	0	23	4	0	39	11	0	1	21	70	1	44	13	22	8	9	0	4	11	27	2	8	0	0
ENSG00000100012	0	1	0	44	0	0	24	0	0	48	0	0	0	0	12	0	0	22	28	1	1	0	0	6	0	0	0	0	2	19	0	0	0
ENSG00000100014	3	119	33	93	57	30	47	58	53	97	64	91	85	46	40	11	23	89	187	56	38	20	88	6	34	16	50	37	57	88	1	50	4
ENSG00000100023	20	86	4	85	68	37	83	79	75	169	26	73	47	6	37	17	34	142	101	1	62	59	40	15	12	38	15	1	134	54	5	27	3
ENSG00000100024	0	0	15	0	0	0	0	0	1	0	2	0	0	0	0	0	14	0	1	0	0	0	0	0	0	1	6	0	0	0	91	8	0
ENSG00000100027	1	0	0	0	0	1	5	19	0	0	9	1	0	0	0	0	0	0	11	97	1	0	0	7	0	0	1	0	0	10	1	9	0
ENSG00000100028	55	1554	32	352	188	116	448	347	579	411	359	230	328	444	325	2	5	483	317	883	222	328	239	110	207	344	87	186	544	161	172	83	7
ENSG00000100029	17	157	12	103	16	21	61	55	45	36	56	21	52	2	39	5	1	119	67	271	58	81	13	27	7	31	10	23	60	25	1	7	0
ENSG00000100030	64	734	51	363	224	92	205	253	205	85	132	8	218	121	100	38	28	272	152	482	111	141	75	69	60	181	198	86	198	112	91	121	29
ENSG00000100031	0	0	0	1	0	8	0	0	0	0	0	0	0	0	7	0	0	0	2	0	19	34	0	2	0	1	12	36	1	16	0	22	0
ENSG00000100033	15	389	4	34	21	24	66	15	78	1	93	35	6	59	31	21	30	42	79	215	74	16	33	12	0	42	4	0	8	7	3	1	0
ENSG00000100034	7	161	19	203	29	42	40	68	72	3	33	47	14	1	19	44	21	70	91	193	62	153	61	53	25	27	184	77	66	40	243	425	79
ENSG00000100036	14	124	26	19	31	0	14	7	3	1	33	0	0	34	1	5	0	19	0	0	7	0	0	2	4	13	0	0	6	8	0	13	23
ENSG00000100038	0	0	0	4	0	0	15	0	0	0	0	0	0	0	0	0	0	0	0	0	0	0	0	1	0	0	0	0	0	13	0	0	0
ENSG00000100055	48	401	141	679	104	263	51	15	62	13	204	137	28	1	20	127	26	103	80	59	157	429	67	127	224	74	3428	357	48	142	785	861	449
ENSG00000100056	0	42	5	11	4	6	37	19	1	0	17	1	0	0	5	0	0	9	94	168	1	24	40	13	2	9	8	1	68	4	1	5	0
ENSG00000100058	0	80	10	36	17	23	21	3	18	0	16	65	44	1	2	1	0	65	0	0	2	1	1	8	5	12	6	0	9	3	0	5	2
ENSG00000100060	0	0	0	28	3	0	9	4	15	0	6	1	0	0	0	0	1	10	0	149	23	11	44	3	4	6	24	0	0	0	49	80	6
ENSG00000100065	1	49	8	59	1	8	3	34	50	54	0	1	9	70	8	0	0	17	41	0	54	0	0	2	0	3	1	10	0	13	0	0	1
ENSG00000100068	0	0	0	0	10	0	0	1	0	99	0	0	0	0	1	0	0	8	24	0	0	0	0	0	4	2	0	0	0	0	0	7	0
ENSG00000100075	7	371	1	40	19	8	33	15	36	4	12	0	58	132	20	1	2	60	39	216	48	12	5	14	14	34	1	0	85	11	1	0	1
ENSG00000100077	0	92	1	25	1	29	3	8	11	1	6	1	18	0	28	1	22	40	26	36	13	20	11	5	19	2	8	29	11	4	1	16	0
ENSG00000100079	0	31	0	0	2	15	0	0	0	0	1	1	12	0	0	0	5	5	0	0	7	0	1	1	0	2	5	1	0	6	0	0	0
ENSG00000100083	41	578	42	257	170	85	206	169	191	358	67	84	115	214	69	15	27	199	223	439	176	213	58	64	46	66	85	86	328	115	99	131	31
ENSG00000100084	1	0	0	1	5	2	14	1	1	1	4	0	13	0	2	5	23	82	31	97	48	19	3	1	12	2	9	0	0	3	45	28	9
ENSG00000100092	18	130	10	44	15	10	41	34	58	0	22	4	23	22	30	12	18	62	95	1	6	62	21	5	17	54	45	17	18	26	149	75	53
ENSG00000100097	14	1	28	0	1	33	2	2	28	0	25	1	6	46	9	0	2	23	3	57	3	19	4	13	7	7	25	5	12	2	8	8	5
ENSG00000100099	61	637	15	301	117	46	98	87	138	32	65	2	59	126	57	1	5	120	117	168	43	91	49	34	24	20	10	45	181	64	192	26	4
ENSG00000100100	172	3887	37	278	239	149	485	296	421	713	87	210	614	347	252	19	118	470	374	1178	465	148	272	130	197	277	107	68	712	166	176	46	48
ENSG00000100104	7	0	23	2	20	7	13	21	64	60	36	1	30	20	36	0	0	43	25	0	4	7	26	4	0	6	0	8	21	24	0	0	1
ENSG00000100105	13	244	21	155	70	34	70	128	145	363	30	1	94	45	80	0	4	183	153	190	178	62	104	46	59	61	9	41	167	37	295	31	2
ENSG00000100106	24	112	17	64	22	8	61	31	48	51	44	1	29	41	55	0	1	105	49	470	102	85	241	20	25	33	47	9	108	29	125	29	2
ENSG00000100109	10	99	20	66	55	52	29	67	43	33	23	5	51	3	14	19	0	36	64	1	45	94	6	2	25	0	6	5	50	40	1	8	2
ENSG00000100116	1	15	0	9	1	11	6	3	1	0	11	0	8	0	21	0	0	19	0	65	2	13	3	19	3	8	6	1	2	18	0	0	0
ENSG00000100124	37	108	2	148	37	17	58	73	19	321	34	39	16	33	10	0	1	44	119	413	34	21	6	34	3	18	4	19	39	68	112	12	18
ENSG00000100129	0	0	0	0	0	0	0	0	0	0	0	0	0	0	0	0	0	6	23	0	0	0	0	0	0	0	0	0	0	0	0	0	0
ENSG00000100138	28	966	51	180	86	65	186	328	283	343	293	72	262	211	135	2	16	303	365	689	233	190	145	106	78	266	39	125	126	143	5	136	31
ENSG00000100139	45	309	13	88	43	49	29	2	64	16	61	94	8	38	34	2	0	66	91	59	19	9	63	13	17	26	42	14	71	39	86	13	3
ENSG00000100146	0	46	0	0	0	0	0	0	0	0	0	0	6	0	1	0	0	10	0	0	0	0	0	0	0	0	0	0	1	0	0	0	0
ENSG00000100147	0	0	0	0	0	3	0	0	0	0	8	0	7	40	2	0	0	2	0	0	0	0	0	3	0	0	1	2	0	0	17	0	1
ENSG00000100150	1	5	0	0	7	13	29	9	1	0	12	84	39	0	15	0	0	24	28	174	7	17	3	1	7	11	0	1	15	21	1	0	1
ENSG00000100151	7	235	6	43	27	35	18	11	42	24	17	0	17	40	28	0	0	21	28	293	33	27	11	3	10	12	0	9	41	10	2	1	1
ENSG00000100154	0	1	1	8	17	3	6	22	19	0	1	1	0	0	7	0	9	0	0	8	0	1	9	0	0	18	0	0	6	0	0	0	0
ENSG00000100162	3	0	0	1	3	1	1	0	0	0	1	0	12	2	8	0	27	0	7	243	1	1	14	2	0	10	0	13	23	1	0	9	9
ENSG00000100170	13	322	44	24	27	10	14	24	55	0	47	86	36	104	40	3	0	11	0	0	21	72	28	1	27	17	14	1	7	3	1	30	2
ENSG00000100181	1	1	12	1	1	8	8	43	10	0	4	1	33	31	1	7	10	13	16	2	59	15	6	3	0	21	0	2	1	0	1	0	45
ENSG00000100196	0	220	0	31	12	4	17	17	32	0	0	1	1	124	10	0	2	40	100	148	14	0	0	5	13	32	17	4	25	6	1	0	0
ENSG00000100201	251	4609	94	1594	778	594	1142	1256	1284	1670	416	375	768	351	874	95	240	1585	2377	4444	759	735	748	353	254	664	836	377	1643	490	697	621	226
ENSG00000100206	0	81	0	3	0	2	0	0	0	0	0	1	29	0	0	0	0	18	0	0	1	0	0	4	0	0	1	0	1	5	0	0	1
ENSG00000100207	53	331	5	134	97	48	101	67	95	137	71	68	77	80	48	15	67	136	165	332	84	54	74	77	41	46	49	61	105	89	166	67	55
ENSG00000100209	5	195	1	14	28	16	22	51	18	0	2	1	23	3	29	7	1	40	53	0	7	4	0	0	27	6	1	4	46	19	3	0	2
ENSG00000100211	4	1	4	197	11	9	90	168	52	253	11	0	26	2	14	6	1	52	78	1035	89	1	64	22	4	51	2	42	37	34	9	5	3
ENSG00000100216	38	778	6	134	116	70	193	127	362	319	156	178	235	324	133	16	23	194	193	717	96	85	114	65	72	186	40	39	242	122	70	11	9
ENSG00000100218	18	0	0	87	3	0	38	29	1	0	3	0	0	1	20	0	0	1	0	315	1	0	1	7	0	7	0	13	1	29	3	0	0
ENSG00000100219	349	12221	289	1189	1161	665	2426	1322	4334	2477	1237	1723	2119	1367	1530	22	409	2333	4654	11506	1289	1621	2038	828	1198	2839	571	612	2615	1145	456	285	57
ENSG00000100220	2	987	14	182	154	77	139	152	326	231	179	81	236	295	99	15	25	258	574	613	229	106	178	52	75	193	75	83	283	167	168	64	46
ENSG00000100221	23	685	60	294	130	128	78	77	150	88	119	51	134	74	46	16	136	179	253	733	225	488	63	113	59	95	317	60	202	98	213	679	97
ENSG00000100225	98	1947	39	366	158	248	288	522	487	413	194	172	434	470	242	8	36	572	445	804	262	178	208	101	144	265	75	199	600	168	198	91	8
ENSG00000100226	12	213	34	257	71	40	59	75	42	195	28	51	58	21	36	19	8	106	101	289	44	73	69	31	22	32	129	114	59	47	129	85	3
ENSG00000100227	33	314	34	69	47	56	87	91	206	190	70	37	32	61	48	1	9	199	68	689	66	51	57	40	14	47	20	41	111	51	134	59	5
ENSG00000100228	0	0	0	81	1	7	36	30	0	108	0	31	3	1	10	0	0	7	47	265	43	1	0	3	2	4	4	0	1	19	1	1	0
ENSG00000100239	73	203	0	65	44	11	58	69	78	6	30	0	49	97	19	1	36	87	163	107	89	56	131	26	16	56	35	43	93	25	96	30	1
ENSG00000100241	41	332	2	298	86	92	68	106	133	168	74	121	46	64	75	10	34	272	175	218	115	88	167	47	12	54	19	64	73	106	28	61	38
ENSG00000100242	64	1473	16	291	93	130	246	196	281	281	95	153	189	91	111	29	2	414	297	809	268	222	297	106	119	180	226	100	275	105	187	273	91
ENSG00000100243	85	1505	48	312	158	126	296	221	341	394	134	82	234	343	188	16	43	425	567	1253	327	186	219	112	90	275	139	126	323	121	182	79	7
ENSG00000100246	23	226	12	251	27	29	204	88	112	334	14	156	20	29	104	3	6	147	99	1062	34	24	153	55	21	100	8	34	68	76	16	10	4
ENSG00000100258	22	231	15	39	16	36	16	0	27	14	23	4	15	0	32	0	3	23	69	249	87	14	1	26	8	19	19	45	46	7	1	15	0
ENSG00000100263	15	128	12	32	24	18	43	39	75	162	21	0	0	22	21	0	0	40	49	1	16	3	5	18	24	27	13	41	17	4	0	4	0
ENSG00000100266	50	223	119	129	107	107	152	32	126	202	47	192	75	250	102	25	29	100	336	1070	171	185	161	58	39	105	410	108	203	53	187	400	140
ENSG00000100271	6	0	0	57	0	13	2	0	10	0	1	0	0	28	3	0	1	23	33	148	3	0	0	2	5	1	0	0	2	4	0	5	2
ENSG00000100280	156	1483	54	242	197	142	286	162	538	394	112	288	323	139	159	8	53	376	394	1068	283	209	391	123	71	226	26	89	364	135	55	59	7
ENSG00000100281	17	403	10	162	22	61	159	56	113	92	84	64	57	83	67	1	12	65	120	847	53	42	18	42	38	74	48	55	121	27	4	23	23
ENSG00000100284	30	461	47	222	95	115	142	52	93	132	71	3	121	122	66	16	29	154	139	861	80	177	142	55	69	67	265	35	75	84	47	310	76
ENSG00000100288	0	28	8	57	31	22	67	30	21	1	3	0	29	10	22	0	2	70	75	0	43	14	68	4	4	20	29	18	24	34	3	21	1
ENSG00000100290	13	590	24	140	70	109	33	210	78	105	50	2	83	178	30	1	25	138	125	290	121	90	36	66	53	32	35	67	193	103	1	37	2
ENSG00000100292	34	1005	136	421	174	99	222	195	211	141	256	87	59	153	83	29	92	239	214	218	334	246	147	87	63	96	139	51	153	103	202	275	206
ENSG00000100294	0	2	14	48	3	5	7	46	1	73	5	0	29	25	6	0	0	32	56	1	13	1	2	3	6	0	18	19	22	12	1	1	0
ENSG00000100296	2	50	27	97	72	14	19	16	29	2	47	65	29	127	9	0	17	83	120	197	1	22	59	29	13	24	58	52	15	30	2	55	15
ENSG00000100297	29	38	1	37	3	8	20	22	53	0	24	2	8	24	16	0	0	52	15	65	20	59	36	14	5	31	1	15	31	12	55	34	0
ENSG00000100299	0	173	12	87	54	19	66	19	43	88	14	59	19	5	49	6	1	34	65	178	23	10	32	35	18	50	71	64	75	10	26	104	6
ENSG00000100300	151	1425	76	360	320	196	577	547	958	460	593	402	621	315	345	37	226	740	610	2172	652	427	499	210	252	482	573	255	531	317	268	424	36
ENSG00000100304	7	543	17	82	67	94	151	38	149	57	124	37	124	69	51	9	33	290	163	294	138	135	114	48	39	141	14	20	141	108	7	44	3
ENSG00000100307	32	197	15	183	54	27	101	2	73	359	4	79	48	15	38	10	0	51	150	350	98	85	118	33	19	35	25	16	69	12	39	69	8
ENSG00000100311	0	0	0	6	4	10	0	11	2	0	1	0	0	0	0	0	0	9	0	0	4	0	0	0	0	8	0	0	8	0	0	0	0
ENSG00000100316	109	1207	48	339	214	143	460	307	346	345	313	147	332	155	438	38	65	844	435	2043	295	150	150	119	128	462	70	156	310	165	320	122	46
ENSG00000100319	0	105	0	28	1	22	16	33	16	1	11	0	27	6	6	0	12	31	1	0	10	55	23	9	0	28	26	27	26	3	1	20	31
ENSG00000100320	35	722	31	209	127	104	148	203	194	144	82	22	182	192	101	0	7	252	267	1116	174	206	113	77	60	92	54	46	353	132	7	8	5
ENSG00000100321	5	310	7	35	73	53	47	41	156	2	25	35	8	42	35	0	0	105	171	2	16	72	41	10	8	63	6	9	38	21	5	13	1
ENSG00000100324	1	19	1	82	12	7	37	9	48	36	8	171	8	8	10	0	0	48	37	0	38	15	21	8	15	22	31	11	59	13	1	19	11
ENSG00000100325	12	36	3	127	79	23	85	72	89	390	47	98	61	40	59	0	81	80	377	1214	41	69	26	19	16	62	14	14	70	56	6	19	2
ENSG00000100330	3	145	16	183	61	32	89	130	41	53	53	111	33	66	52	48	21	118	143	210	164	134	5	46	39	33	137	66	121	56	135	87	79
ENSG00000100335	31	911	24	240	73	89	170	133	230	86	81	145	49	186	78	18	42	232	216	343	185	77	75	70	40	99	40	50	164	82	7	29	5
ENSG00000100336	8	0	13	7	2	5	26	10	28	0	7	0	0	0	0	0	0	5	7	0	11	2	5	6	15	22	3	7	0	9	0	27	0
ENSG00000100342	229	5689	272	709	276	407	661	406	550	456	611	575	878	491	303	8	111	483	608	985	641	924	307	207	265	159	392	200	438	476	192	111	105
ENSG00000100344	0	0	0	0	1	5	1	1	5	0	0	0	0	0	1	0	0	0	0	1	7	0	0	0	0	0	0	0	6	0	2	0	1
ENSG00000100345	106	2607	199	845	363	279	351	198	673	462	253	704	290	322	281	132	148	669	424	1952	376	1210	485	171	203	254	866	468	524	221	235	640	204
ENSG00000100347	32	167	4	34	21	8	83	34	26	2	26	63	21	39	31	0	2	63	76	218	26	7	5	19	18	50	15	4	84	12	4	15	1
ENSG00000100348	27	247	12	139	71	78	131	155	151	113	152	119	73	140	44	7	40	216	169	387	100	74	80	67	76	75	64	120	165	81	38	73	0
ENSG00000100350	2	45	0	22	1	5	0	8	0	0	0	19	14	34	5	0	1	46	0	1	1	13	0	1	0	5	1	0	1	1	17	0	0
ENSG00000100351	0	0	0	0	0	4	13	1	0	0	0	0	2	0	1	0	0	1	0	1	0	10	1	0	4	0	1	0	0	11	0	0	0
ENSG00000100353	152	1691	28	515	210	159	548	338	464	387	322	165	515	220	313	34	87	547	499	841	240	207	269	182	131	406	163	125	425	326	225	104	4
ENSG00000100354	163	1996	117	1036	370	280	604	318	495	510	254	583	275	548	337	58	92	704	880	737	380	295	330	182	155	200	351	334	538	293	71	292	193
ENSG00000100359	83	602	2	379	261	137	319	122	382	278	130	109	163	203	141	15	77	447	495	1693	156	31	123	85	116	220	47	48	289	204	249	59	7
ENSG00000100360	9	112	0	219	46	6	87	139	54	189	16	1	20	47	71	0	26	66	64	450	24	3	28	23	28	25	9	35	21	39	6	21	0
ENSG00000100364	104	496	27	216	64	58	228	110	216	109	101	41	170	123	114	19	72	438	110	782	187	74	133	69	56	137	72	52	261	126	178	51	46
ENSG00000100365	26	65	202	587	63	102	4	16	47	75	85	289	30	65	26	132	33	44	41	4	110	423	30	124	125	49	1443	237	4	80	39	1083	318
ENSG00000100368	33	2	19	85	42	33	0	29	22	3	29	129	0	0	1	49	39	3	29	1	22	183	5	23	47	14	600	91	2	56	11	262	114
ENSG00000100372	17	168	1	53	24	38	22	42	35	149	38	0	37	16	30	0	2	68	45	114	42	42	28	18	7	62	11	25	52	22	0	8	2
ENSG00000100373	0	0	0	0	0	0	0	0	18	15	0	0	0	0	0	0	0	0	0	0	0	0	0	2	0	0	0	0	0	0	0	0	0
ENSG00000100376	46	165	2	33	21	22	68	17	36	0	4	4	47	16	11	27	2	122	220	2	82	15	27	12	19	42	13	6	67	30	42	3	3
ENSG00000100379	17	121	3	52	15	6	47	32	15	0	1	39	0	10	6	0	0	81	7	86	3	0	10	22	11	9	1	0	12	21	1	24	2
ENSG00000100380	142	1316	95	479	235	194	398	597	554	404	241	383	300	177	427	4	57	529	431	1211	301	236	187	137	131	258	130	170	342	254	22	109	6
ENSG00000100385	0	0	0	0	0	1	3	6	7	0	0	0	0	0	3	0	0	4	1	0	21	17	0	0	9	0	0	0	11	0	0	1	0
ENSG00000100387	57	666	74	264	190	132	307	309	378	313	224	270	402	176	129	8	5	422	481	946	179	280	167	74	161	203	76	164	224	103	200	91	9
ENSG00000100393	71	1265	80	407	281	227	161	237	287	440	222	526	239	155	116	6	10	276	204	769	70	287	152	112	125	100	331	216	348	236	72	237	39
ENSG00000100395	0	93	21	24	37	7	20	4	56	64	28	35	17	71	25	0	0	23	40	77	12	28	6	9	9	7	6	10	48	39	1	4	2
ENSG00000100399	0	0	0	9	4	3	16	8	21	0	0	4	6	0	15	3	0	20	17	65	7	0	22	10	0	10	2	6	0	4	2	0	0
ENSG00000100401	86	373	22	202	114	67	114	77	143	143	112	67	71	97	65	9	4	144	112	466	48	136	102	57	35	127	35	44	112	61	42	46	3
ENSG00000100403	96	759	2	31	67	27	56	30	51	131	16	3	21	130	46	1	11	130	157	90	61	46	152	24	9	19	10	2	68	13	1	21	4
ENSG00000100410	0	332	14	61	55	56	30	74	74	184	50	65	117	43	64	14	19	91	53	361	47	63	54	42	28	100	47	34	113	31	3	52	23
ENSG00000100412	54	1089	11	201	84	49	206	168	309	259	150	210	108	222	139	0	47	269	516	1729	296	145	162	74	48	160	37	30	226	88	44	72	6
ENSG00000100413	29	14	0	15	11	10	28	2	24	0	18	2	12	105	26	0	2	48	76	48	63	5	67	11	7	2	1	8	32	6	2	0	0
[truncated: 17,155 more rows]
