# Supplementary material for: Inflammatory pathways are upregulated in the nasal epithelium in patients with idiopathic pulmonary fibrosis
Source: Respir Res. 2018 Nov 26;19:233. doi: 10.1186/s12931-018-0932-7 (PMC6257973; doi:10.1186/s12931-018-0932-7)
Supplement: Supplementary file 4 — Normalized counts using DESeq wald with RUV. (CSV 5188 kb) [file 12931_2018_932_MOESM4_ESM.csv]

	JSMS_NE_028	JSMS_NE_029	JSMS_NE_030	JSMS_NE_031	JSMS_NE_032	JSMS_NE_033	JSMS_NE_034	JSMS_NE_035	JSMS_NE_036	JSMS_NE_037	JSMS_NE_038	JSMS_NE_039	JSMS_NE_040	JSMS_NE_041	JSMS_NE_042	JSMS_NE_049	JSMS_NE_051	JSMS_NE_052	JSMS_NE_054	JSMS_NE_055	JSMS_NE_056	JSMS_NE_057	JSMS_NE_058	JSMS_NE_003	JSMS_NE_004	JSMS_NE_005	JSMS_NE_006	JSMS_NE_007	JSMS_NE_008	JSMS_NE_009	JSMS_NE_043	JSMS_NE_044	JSMS_NE_045
ENSG00000000003	374.152114210871	245.485259922003	273.802799118185	311.620774473357	202.751424217693	249.319206489613	340.312219222489	312.611598636893	112.631517149749	782.039167576875	171.511297249946	278.75483979472	221.643931606425	405.028279194207	344.414421199553	16.4229764516668	304.88680737269	233.34271588298	286.95016304045	577.179633182932	292.874098804245	158.740154421985	209.320767048867	180.751865084942	275.661439582432	218.739424396156	206.792612088522	286.904467462751	327.388922599327	333.250765440793	296.316811192388	70.370613470353	91.6289494489754
ENSG00000000419	15.9699073138787	59.0446212491083	13.1953156201535	47.6886673336536	57.6865976853688	57.1127697685458	43.1062144348487	69.9594505014014	46.9297988123955	101.913274370248	43.7528819515168	80.9557468864905	76.4052062369976	45.8934920669695	47.601993173922	8.21148822583339	9.94196110997901	27.5026405460603	49.629745179952	31.8159979380994	49.9475207263053	14.6981624464801	36.562579397182	62.1334536229488	24.0402418240493	31.0024381033922	120.073129599787	48.9836895668112	30.8561444622369	39.7628754219128	63.8848170919369	24.4142944693061	249.434362388878
ENSG00000000457	0	16.4775687206814	0	66.1885813855019	33.9332927560993	13.1798699465875	7.94061844852475	51.0514909064281	19.7105155012061	1.05609610746371	6.12540347321236	15.8573112458074	44.7417874360797	40.7942151706396	20.5341931338487	24.6344646775002	96.1056240631304	33.518843165511	26.6195905965197	0	14.3788317242394	1.46981624464801	76.7814167340823	33.8909747034266	20.8348762475094	24.1130074137495	68.0414401065461	25.6581231064249	9.41373898847906	18.9347025818632	1.35925142748802	2.87226993756543	10.1809943832195
ENSG00000000460	0	6.56051347212314	42.8847757654989	0	10.1799878268298	5.49161247774479	0	8.19344915782179	0	0	3.50023055612135	0	26.8450724616478	0	13.0672138124492	0	0	6.87566013651507	8.57241053108262	0.187152929047643	0	0	0	0	0	9.47296719825873	10.6731670755366	1.16627832301931	0.522985499359948	0.946735129093162	2.71850285497604	0	0
ENSG00000000938	47.909721941636	0.915420484482299	221.021536637571	133.199381173308	62.7765915987837	136.191989448071	5.67187032037482	12.6053063966489	16.4254295843384	53.3328534269172	71.7547264004876	114.339560035559	6.19501672191872	0.728468128047135	10.2670965669244	977.167098874173	198.83922219958	10.3134902047726	10.3771285376263	0.748611716190574	109.733189474459	468.136473920391	38.3907083670411	153.921510111396	254.826563334922	25.8353650861602	1777.08231807685	298.567250692944	6.27582599231937	75.7388103274529	285.442799772484	2023.51417101484	2199.09478677541
ENSG00000000971	191.638887766544	155.774052442738	75.8730648158827	108.121719903025	160.334808272569	158.15843935905	170.156109611245	242.021882815659	155.337634069029	180.064386322562	169.761181971885	144.38499186972	192.04551837948	300.857336883467	224.009379641986	180.652740968335	99.4196110997901	179.626621066456	90.2359003271854	243.673113620032	154.383245881307	62.4671903975404	116.086189586053	148.273014327491	262.839977276272	181.708734439327	58.7024189154515	99.1336574566417	168.401330793903	114.554950620273	19.0295199848323	15.7974846566099	61.085966299317
ENSG00000001036	13.6884919833246	39.0579406712448	32.9882890503838	36.1776097013924	36.4782897128067	25.261417397626	34.0312219222489	23.3198168338005	50.6841827173871	117.226667928471	21.0013833367281	121.016322665372	46.1184578187283	116.554900487542	53.2022276649717	0	9.94196110997901	39.5350457849617	60.0068737175783	20.7739751242884	38.5958114703269	45.5643035840883	39.3047728519707	14.1212394597611	14.4241450944296	46.5036571550883	40.0243765332624	6.99766993811588	21.9653909731178	46.3900213255649	4.07775428246406	43.0840490634814	5.09049719160975
ENSG00000001084	50.1911372721901	352.436886525685	141.84964291665	187.876904926549	136.5815033433	88.9641221394656	281.891954922629	330.889292912034	153.460442116533	294.650813982374	84.0055333469123	264.566719206366	150.057071708698	93.9723885180805	140.005862276241	106.749346935834	62.9657536965337	143.529405349752	231.455084339231	340.805483795759	354.173328786529	57.3228335412724	186.469154925628	163.806377733229	211.554128051634	221.322960904772	49.363397724357	80.4732042883327	256.785880185734	195.027436593191	17.6702685573442	54.5731288137431	162.895910131512
ENSG00000001167	50.1911372721901	27.615184615216	59.3789202906908	11.099948431109	22.0566402914645	20.8681274154302	9.6421795446372	6.9329185181569	13.6096416555947	0	0.875057639030337	8.34595328726706	21.3383909310534	62.6482590120536	10.2670965669244	16.4229764516668	36.4538574032564	9.45403268770822	0.902359003271854	0	46.9203982580444	26.4566924036642	0.914064484929551	4.23637183792833	27.2456074005892	16.3623978879014	77.3804612976407	32.6557930445408	14.1206084827186	16.0944971945837	127.769634183874	40.211779125916	132.352926981853
ENSG00000001460	0	4.27196226091739	23.0918023352686	49.7442133394145	16.1183140591472	10.9832249554896	19.2843590892744	13.2355717164813	16.8947275724624	44.3560365134757	8.75057639030337	3.33838131490682	17.2083797831076	29.8671932499326	31.734662115948	139.595299839168	36.4538574032564	0.859457517064384	12.633026045806	10.2934110976204	5.29746431945663	86.7191584342326	7.31251587943641	5.64849578390443	4.80804836480986	12.9176825430801	1.33414588444208	16.3278965222704	2.61492749679974	36.9226700346333	1.35925142748802	10.052944781479	229.072373622439
ENSG00000001461	77.5681212388392	182.931526815713	141.84964291665	109.355047506481	163.728137548179	163.650051836795	114.571780471571	72.4805117807312	130.464840698459	26.9304507403245	153.135086830309	80.9557468864905	101.873608315997	89.6015797497977	102.670965669244	221.710182097501	248.549027749475	139.661846522962	227.394468824507	66.8135956700087	194.492618585765	43.3595792171163	88.6642550381664	138.388146705659	137.830719791216	158.456905861782	112.068254293135	97.9673791336224	136.499215332946	102.247393942061	95.1475999241613	35.9033742195679	453.054250053267
ENSG00000001497	31.9398146277573	0.610280322988199	6.59765781007675	11.099948431109	13.5733171024397	14.2781924421365	20.4187331533494	10.7145104371516	20.1798134893301	43.8279884597438	36.7524208392741	27.5416458479813	24.7800668876749	23.3109800975083	10.2670965669244	0	6.62797407331934	15.8999640656911	27.9731291014275	0.187152929047643	56.7585462798924	0.734908122324005	28.3359990328161	16.9454873517133	8.01341394134976	4.3058941810267	1.33414588444208	24.4918447834056	15.1665794814385	1.89347025818632	0	41.6479140946987	0
ENSG00000001561	146.010581155462	155.774052442738	52.781262480614	127.032743156025	111.131533776225	101.045669590504	94.1530473182221	266.602230289124	55.8464605867506	201.186308471836	17.5011527806067	98.4822487897513	127.342010394996	123.839581768013	105.471082914768	0	142.501442576366	61.4512124701034	125.427901454788	122.398015597159	76.4348423235885	51.4435685626804	84.0939326135187	124.266907245898	107.379746814087	80.9508106033019	33.353647111052	89.8034308724872	100.93620137647	121.182096523925	252.820765512771	11.4890797502617	20.361988766439
ENSG00000001617	0	104.052795069488	125.355498391458	64.5441445808932	68.7149178311011	76.8825746884271	60.1218253959731	17.6474289553085	83.535041886064	1.05609610746371	76.1300145956393	34.218408477795	82.6002229589163	147.150561865521	74.6697932139953	41.0574411291669	119.303533319748	91.1024968088247	64.5186687339376	0.748611716190574	120.328118113372	195.485560538185	53.9298046108435	28.2424789195222	14.4241450944296	61.1436973705791	46.6951059554728	31.4895147215215	55.9594484315144	44.4965510673786	101.943857061601	4.30840490634814	71.2669606825364
ENSG00000001626	0	9.76448516781119	26.390631240307	22.6110060633702	18.6633110158546	14.2781924421365	5.67187032037482	48.5304296270983	20.649111477454	0	28.0018444489708	0	3.44167595662151	0	16.8007034731489	0	43.0818314765757	6.44593137798288	35.6431806292383	0	6.05424493652186	13.9632543241561	0.914064484929551	0	6.41073115307981	7.75060952584805	0	5.83139161509657	8.36776798975916	3.78694051637265	0	0	10.1809943832195
ENSG00000001629	38.7840606194196	128.616578069763	0	95.3773346673071	48.3549421774415	116.42218452819	58.9874513318982	62.3962666634121	85.8815318266838	43.8279884597438	49.0032277856988	146.8887778559	71.5868598977274	42.2511514267339	115.738179481693	32.8459529033335	36.4538574032564	60.1620261945069	63.6163097306657	98.6295936081081	25.7305409802179	86.7191584342326	85.9220615833778	59.3092057309966	81.7368222017676	60.2825185343738	98.726795448714	81.639482611352	67.4651294174333	118.341891136645	179.421188428418	30.158834344437	61.085966299317
ENSG00000001630	0	0	0	0	1.69666463780496	4.39328998219583	0	13.2355717164813	1.40789396437186	0	2.62517291709101	0	4.13001114794581	0	5.60023449104965	0	0	1.28918627559658	0.451179501635927	0	0.756780617065232	0	0	0	9.61609672961972	0	0	0	0	1.89347025818632	0	0	0
ENSG00000001631	155.136242477678	38.6002304290036	69.2754070058059	58.7886157647626	22.0566402914645	62.6043822462906	34.5984089542864	42.8580417486063	23.4648994061977	13.2012013432963	55.1286312589112	69.2714122843166	23.4033965050263	35.6949382743096	81.2034001202199	57.4804175808337	6.62797407331934	83.7971079137774	50.9832836848598	42.4837148938151	37.0822502361964	1.46981624464801	47.5313532163366	70.6061972988054	64.1073115307981	56.8378031895524	5.33658353776832	27.9906797524635	28.2412169654372	15.1477620654906	8.15550856492811	30.158834344437	15.2714915748292
ENSG00000002016	2.28141533055409	0	0	0.822218402304372	0	0	0	0	0	0	0	0.834595328726706	4.81834633927012	1.45693625609427	3.73348966069977	0	0	6.01620261945069	27.9731291014275	0	0.756780617065232	0	0	2.82424789195222	0	0	0	0	6.79881149167932	0.946735129093162	0	0	5.09049719160975
ENSG00000002330	6.84424599166228	43.7876131744033	23.0918023352686	9.45551162650028	23.7533049292695	27.4580623887239	44.8077755309611	27.7316740726276	11.7324497030989	28.5145949015201	29.7519597270314	14.188120588354	58.5084912625657	132.581199304579	46.6686207587471	0	16.5699351832983	12.8918627559658	15.3401030556215	50.905596700959	40.1093727044573	18.3727030581001	54.843869095773	14.1212394597611	60.9019459542582	21.5294709051335	14.6756047288629	36.1546280135987	30.8561444622369	20.8281728400496	0	4.30840490634814	35.6334803412682
ENSG00000002549	73.005290577731	107.409336845923	155.044958536804	139.366019190591	23.7533049292695	57.1127697685458	128.751456272508	102.733247132689	77.4341680404526	27.4584987940564	49.0032277856988	11.6843346021739	78.4702118109705	65.5621315242422	99.8708484237187	8.21148822583339	195.52523516292	62.3106699871678	73.9934382682921	111.543145712395	58.2721075140229	72.7559041100765	66.7267073998572	138.388146705659	339.76875111323	70.6166645688378	53.3658353776832	110.796440686835	88.3845493918312	201.654582496843	70.681074229377	56.0092637825259	356.334803412682
ENSG00000002586	79.8495365693933	16.7827088821755	72.5742359108443	32.4776268910227	25.4499695670745	48.3261898041541	44.2405884989236	43.4883070684387	22.0570054418259	51.2206612119898	72.6297840395179	20.0302878894409	39.9234410968095	199.600267084915	51.3354828346218	139.595299839168	112.675559246429	43.8323333702836	90.6870798288214	64.1934546633417	47.6771788751096	25.7217842813402	51.1876111560548	26.8303549735461	38.4643869184789	82.6731682757126	37.3560847643783	54.8150811819078	24.0573329705576	36.9226700346333	2.71850285497604	17.2336196253926	30.5429831496585
ENSG00000002587	93.5380285527178	359.302540159302	465.134875610411	205.554600576093	277.404668281112	130.700376970326	302.310688075978	136.137309083808	505.903231197623	130.427869271768	329.021672275407	396.432781145185	441.911192830202	211.984225261716	224.009379641986	147.806788065001	109.361572209769	238.929189743899	223.333853309784	232.818243735268	204.330766607613	369.658785528975	260.508378204922	160.982129841276	320.536557653991	316.913811723565	122.741421368671	244.918447834056	143.298026824626	240.470722789663	35.3405371146885	73.2428834079184	305.429831496585
ENSG00000002822	2.28141533055409	0	3.29882890503838	25.8998796725877	7.63499087012234	13.1798699465875	10.2093665766747	1.26053063966489	13.6096416555947	0	21.0013833367281	18.3610972319875	4.81834633927012	4.37080876828281	20.5341931338487	0	3.31398703665967	13.3215915144979	2.70707700981556	0	16.6491735754351	0	19.1953541835206	11.2969915678089	17.6295106709695	1.72235767241068	6.6707294222104	12.8290615532125	19.873448975678	14.2010269363974	1.35925142748802	5.74453987513086	5.09049719160975
ENSG00000002834	647.921953877363	499.361874285094	204.527392112379	295.587515628422	428.407821045754	376.724615973293	499.124588192984	303.787884159239	434.100639014658	545.473639505005	213.514063923402	495.749625263663	488.717985840255	627.939526376631	356.548262596828	1190.66579274584	533.551912902207	362.69107220117	765.651614276169	910.311846887737	631.911815249469	446.824138372995	662.696751573924	361.503730169884	527.282637340814	487.427221292222	897.88018022952	256.581231064249	495.790253393231	242.364193047849	562.73009098004	1252.30969277853	885.746511340096
ENSG00000002919	22.8141533055409	3.051401614941	42.8847757654989	39.0553741094577	20.3599756536596	36.2446423531156	40.2702792746612	13.2355717164813	28.6271772755613	42.7718923522801	22.7514986147888	3.33838131490682	15.831709400459	42.979619554781	21.4675655490237	24.6344646775002	53.0237925865547	27.5026405460603	31.131385612879	20.0253634080978	29.5144440655441	30.8661411376082	75.8673522491527	26.8303549735461	49.6831664363685	24.9741862499548	60.0365647998936	11.6627832301931	12.0286664852788	15.1477620654906	2.71850285497604	94.7849079396591	20.361988766439
ENSG00000002933	0	0	65.9765781007675	0	0	0	2.83593516018741	0	4.69297988123955	0	10.500691668364	0	0	0	0	0	0	0	0	0	5.29746431945663	2.20472436697202	0	0	12.8214623061596	0	0	0	1.56895649807984	8.52061616183845	0	0	101.809943832195
ENSG00000003056	132.322089172137	19.9866805778635	19.7929734302303	13.5666036380221	46.6582775396365	28.5563848842729	17.0156109611245	77.5226343393907	39.8903289905362	0.528048053731854	70.0046111224269	0	37.8584355228366	57.5489821157237	26.1344276248984	0	9.94196110997901	4.72701634385411	0.902359003271854	36.1205153061952	32.541566533805	21.3123355473961	19.1953541835206	28.2424789195222	57.6965803777183	60.2825185343738	18.6780423821891	34.9883496905794	21.9653909731178	21.7749079691427	4.07775428246406	44.5201840322641	55.9954691077072
ENSG00000003096	0	0	0	6.98885641958716	0	0	0	0.630265319832445	0	0	0	0	0	0	0	0	0	0	0	0	0	0	0	0	0	7.75060952584805	0	2.33255664603863	1.0459709987199	0	0	0	0
ENSG00000003137	0	8.84906468332889	0	0	3.39332927560993	3.29496748664687	0	0	7.97806579810723	25.8743546328608	0	0	0	0	0	0	0	0.859457517064384	0	0	0	0	0	2.82424789195222	0	0	1.33414588444208	16.3278965222704	0.522985499359948	0	0	0	0
ENSG00000003147	34.2212299583114	65.7577048019785	62.6777491957291	23.4332244656746	61.9282592798812	49.4245122997031	14.1796758009371	77.5226343393907	28.6271772755613	7.39267275224595	34.1272479221831	12.5189299309006	22.0267261223777	26.953320737744	20.5341931338487	0	86.1636629531514	17.1891503412877	73.0910792650202	98.4424406790604	60.5424493652186	13.9632543241561	27.4219345478865	11.2969915678089	72.1207254721479	26.6965439223655	4.00243765332624	11.6627832301931	54.3904919334346	42.6030808091923	2.71850285497604	2.87226993756543	55.9954691077072
ENSG00000003249	2.28141533055409	15.8672883976932	0	0.411109201152186	0.848332318902482	0	6.80624438444979	0.630265319832445	2.81578792874373	0	0	0.834595328726706	3.44167595662151	25.4963844816497	0	0	0	4.29728758532192	0	0	9.08136740478279	0.734908122324005	0	0	9.61609672961972	13.7788613792854	0	0	1.56895649807984	0	0	0	0
ENSG00000003393	45.6283066110819	33.1077075221098	16.4941445251919	46.0442305290448	26.298301885977	10.9832249554896	20.9859201853868	35.2948579106169	30.973667216181	0.528048053731854	21.8764409757584	48.406529066149	17.8967149744319	0.728468128047135	19.6008207186738	0	3.31398703665967	29.6512843387212	29.3266676063353	0.187152929047643	3.78390308532616	0.734908122324005	5.4843869095773	25.4182310275699	6.41073115307981	10.3341460344641	8.00487530665248	0	30.333158962877	35.029199776447	2.71850285497604	10.052944781479	10.1809943832195
ENSG00000003400	2.28141533055409	41.6516320439446	0	22.6110060633702	19.5116433347571	8.78657996439166	30.628099730024	23.3198168338005	12.6710456793468	1.05609610746371	8.75057639030337	49.2411243948757	20.6500557397291	2.91387251218854	10.2670965669244	0	23.1979092566177	1.71891503412877	25.2660520916119	18.5281399757167	14.3788317242394	3.67454061162003	75.8673522491527	25.4182310275699	40.0670697067488	15.5012190516961	22.6804800355154	16.3278965222704	20.396434475038	42.6030808091923	1.35925142748802	8.61680981269629	76.3574578741462
ENSG00000003402	579.47949396074	249.909792263668	663.064609912714	759.72980372924	315.579622631723	526.096475367951	343.148154382677	357.990701664829	387.170840202263	429.831115737729	533.785159808505	704.39845744534	141.797049412806	138.408944328956	310.813014253255	1379.53002194001	314.828768482669	264.283186497298	197.1654422149	330.324919769091	404.120849512834	642.30969891118	196.523864259853	467.413026118092	700.372378473969	261.798366206423	2087.93830915186	565.644986664367	313.791299615969	479.994710450233	577.681856682408	1288.21306699809	2402.7146744398
ENSG00000003436	50.1911372721901	28.6831751804454	6.59765781007675	0.411109201152186	33.9332927560993	8.78657996439166	1.70156109611245	23.9500821536329	16.8947275724624	0	13.125864585455	52.5795057097825	35.1050947575394	44.4365558108753	5.60023449104965	8.21148822583339	9.94196110997901	4.29728758532192	1.35353850490778	32.3774567252423	19.676296043696	0	8.22658036436596	26.8303549735461	20.8348762475094	11.1953248706694	0	1.16627832301931	7.84478249039922	3.78694051637265	2.71850285497604	1.43613496878271	5.09049719160975
ENSG00000003509	0	0	23.0918023352686	12.7443852357178	38.1749543506117	15.3765149376854	30.628099730024	9.45397979748668	0.93859597624791	59.1413820179676	6.12540347321236	2.50378598618012	16.5200445917833	0	13.0672138124492	0	0	24.0648104778027	0	0	19.676296043696	2.20472436697202	0	19.7697352436655	0	22.3906497413388	1.33414588444208	24.4918447834056	2.09194199743979	7.57388103274529	1.35925142748802	1.43613496878271	5.09049719160975
ENSG00000003756	50.1911372721901	154.248351635267	145.148471821689	294.765297226117	126.40151551647	173.534954296735	135.557700656958	181.516412111744	206.021816786416	206.994837062887	193.387738225704	277.085649137266	231.96895947629	192.315585804444	138.139117445891	197.075717420001	248.549027749475	136.653745213237	335.226369715494	227.95226758003	115.787434410981	208.713906740017	292.500635177456	162.394253787252	142.638768156026	157.595727025577	190.782861475218	156.281295284588	205.0103157491	130.649447814856	365.638633994277	155.102576628533	66.1764634909267
ENSG00000003989	9.12566132221637	0	0	61.2552709716757	3.39332927560993	2.19664499109792	6.23905735241231	78.1528996592232	26.2806873349415	46.4682287284031	8.75057639030337	0	0	0.728468128047135	11.2004689820993	8.21148822583339	56.3377796232144	4.29728758532192	17.5960005638012	82.3472887809631	3.78390308532616	0.734908122324005	0.914064484929551	7.06061972988054	6.41073115307981	4.3058941810267	4.00243765332624	34.9883496905794	0.522985499359948	22.7216430982359	4.07775428246406	2.87226993756543	5.09049719160975
ENSG00000004059	0	0	0	0.411109201152186	0	4.39328998219583	0	0	0	0	0	0	0.688335191324302	0	5.60023449104965	57.4804175808337	0	2.14864379266096	12.633026045806	0	0.756780617065232	0	2.74219345478865	0	1.60268278826995	0	0	0	0	0	0	5.74453987513086	0
ENSG00000004139	2.28141533055409	21.6649514660811	3.29882890503838	36.9998281036967	54.2932684097589	7.68825746884271	24.9562294096492	6.9329185181569	5.63157585748746	32.2109312776431	0.875057639030337	0.834595328726706	9.63669267854023	0	20.5341931338487	106.749346935834	39.767844439916	7.30538889504726	12.633026045806	90.0205588719165	23.4601991290222	0.734908122324005	31.0781924876047	7.06061972988054	12.8214623061596	6.88943068964271	9.33902119109456	44.3185762747339	12.0286664852788	3.78694051637265	1.35925142748802	7.18067484391357	0
ENSG00000004142	114.070766527705	67.435975690196	19.7929734302303	28.3665348795008	44.1132805829291	70.2926397151333	77.7046233891351	70.5897158212339	45.9912028361476	2.11219221492741	26.2517291709101	56.752482353416	82.6002229589163	201.785671469056	44.8018759283972	8.21148822583339	13.2559481466387	47.6998921970733	48.7273861766801	142.236226076209	36.3254696191312	58.0577416635964	112.429931646335	52.248586001116	33.656338553669	93.868493146382	36.0219388799362	24.4918447834056	74.7869264084725	61.5377833910555	138.643645603778	24.4142944693061	50.9049719160975
ENSG00000004399	2.28141533055409	20.9021010623458	0	0.411109201152186	18.6633110158546	1.09832249554896	9.07499251259972	5.04212255865956	23.4648994061977	0	2.62517291709101	0.834595328726706	12.3900334438374	0	5.60023449104965	0	6.62797407331934	8.16484641211165	0.902359003271854	0.187152929047643	2.2703418511957	21.3123355473961	8.22658036436596	5.64849578390443	12.8214623061596	3.44471534482136	0	1.16627832301931	7.84478249039922	3.78694051637265	1.35925142748802	7.18067484391357	0
ENSG00000004455	54.7539679332982	90.6266279637476	49.4824335755756	39.0553741094577	60.2315946420762	77.980897183976	81.6749326133974	155.045268678781	109.346431232881	0	119.007838908126	138.542824568633	84.6652285328892	75.0322171888549	70.9363035532955	16.4229764516668	62.9657536965337	131.497000110851	123.623183448244	114.163286719062	84.759429111306	67.6115472538085	125.226834435348	101.67292411028	67.312677107338	100.757923836025	30.6853553421678	129.456893855144	114.010838860469	90.8865723929435	237.868999810403	43.0840490634814	142.533921365073
ENSG00000004468	27.3769839666491	0	0	87.1551506442634	4.24166159451241	12.0815474510385	61.2561994600481	53.5725521857578	3.75438390499164	147.853455044919	0	55.0832916959626	11.7016982525131	0.728468128047135	29.8679172855981	0	0	10.7432189633048	22.1077955801604	44.1680912552438	35.5686890020659	9.55380559021206	0.914064484929551	25.4182310275699	28.8482901888591	15.5012190516961	5.33658353776832	11.6627832301931	16.7355359795183	23.668378227329	1.35925142748802	12.9252147190444	0
ENSG00000004478	11.4070766527705	86.8123759450713	59.3789202906908	39.877592511762	22.0566402914645	26.359739893175	30.0609126979866	47.2698989874334	28.6271772755613	2.11219221492741	14.0009222244854	0	31.6634188009179	81.5884303412792	56.0023449104965	0	9.94196110997901	28.7918268216569	29.3266676063353	47.5368439781014	9.83814802184802	22.0472436697201	32.9063214574638	32.4788507574505	32.053655765399	42.1977629740616	25.3487718043995	36.1546280135987	20.9194199743979	41.6563456800991	24.4665256947843	8.61680981269629	10.1809943832195
ENSG00000004487	98.100859213826	48.2121455160677	3.29882890503838	69.4774549947194	37.3266220317092	23.0647724065281	62.3905735241231	35.2948579106169	40.3596269786601	79.7352561135099	57.7538041760022	70.94060294177	22.715061313702	83.7738347254206	37.3348966069977	16.4229764516668	13.2559481466387	35.2377581996397	54.5927196979472	147.476508089543	42.379714555653	10.2887137125361	85.9220615833778	57.8970817850204	27.2456074005892	31.0024381033922	16.009750613305	20.9930098143477	61.1893034251139	38.8161402928196	55.7293085270088	18.6697545941753	5.09049719160975
ENSG00000004534	34.2212299583114	57.8240606031319	29.6894601453454	171.021427679309	134.884838705495	77.980897183976	46.5093366270736	80.0436956187205	61.9473344323621	126.731532895645	81.3803604298213	25.8724551905279	59.19682645389	93.9723885180805	131.605510539667	205.287205645835	59.651766659874	64.4593137798288	102.417746871355	95.0736879562028	135.463730454677	23.5170599143682	11.8828383040842	90.3759325424709	52.8885320129084	56.8378031895524	88.0536283731773	39.6534629826567	70.080056914233	59.6443131328692	77.4773313668171	63.1899386264394	381.787289370731
ENSG00000004660	36.5026452888655	0.15257008074705	9.89648671511513	0.822218402304372	15.2699817402447	2.19664499109792	0	5.67238787849201	4.69297988123955	0	0	0	0	0	8.40035173657447	8.21148822583339	3.31398703665967	10.3134902047726	0	0	0	9.55380559021206	0	0	0	2.58353650861602	2.66829176888416	15.1616181992511	10.459709987199	0	1.35925142748802	15.7974846566099	0
ENSG00000004700	41.0654759499737	12.6633167020051	0	39.877592511762	17.8149786969521	10.9832249554896	20.4187331533494	35.2948579106169	23.9341973943217	46.996276782135	38.5025361173348	58.4216730108694	29.598413226945	55.3635777315823	36.4015241918227	0	3.31398703665967	25.7837255119315	15.7912825572575	0.56145878714293	25.7305409802179	47.0341198287363	0.914064484929551	32.4788507574505	41.6697524950188	18.0847555603121	24.0146259199574	58.3139161509657	14.6435939820785	38.8161402928196	0	17.2336196253926	10.1809943832195
ENSG00000004766	0	18.6135498511401	3.29882890503838	27.1332072760443	35.6299573939043	14.2781924421365	18.7171720572369	35.2948579106169	39.4210310024122	33.2670273851068	22.7514986147888	0.834595328726706	13.0783686351617	83.0453665973734	29.8679172855981	0	6.62797407331934	33.518843165511	20.7542570752527	30.5059274347659	6.81102555358709	28.6614167706362	0	16.9454873517133	25.6429246123192	11.1953248706694	10.6731670755366	23.3255664603863	25.6262894686374	41.6563456800991	2.71850285497604	1.43613496878271	15.2714915748292
ENSG00000004777	2.28141533055409	0	0	0	1.69666463780496	0	6.80624438444979	0	0	0	0	0	0	0	2.80011724552482	0	0	0.429728758532192	0	0	0	0	0	0	0	5.16707301723204	0	1.16627832301931	0	0	0	0	0
ENSG00000004779	214.453041072085	142.042745175503	128.654327296497	155.399278035526	139.126500300007	53.8178022818989	141.229570977333	271.014087527951	133.749926615327	263.495978812195	183.762104196371	308.800271628881	316.634188009179	295.02959185909	202.541814092962	41.0574411291669	135.873468503046	131.497000110851	204.384314241075	456.091688089107	150.599342795981	99.9475046360647	204.750444624219	158.157881949324	171.487058344885	186.014628620353	37.3560847643783	94.4685441645644	174.154171286863	133.489653202136	55.7293085270088	94.7849079396591	407.23977532878
ENSG00000004799	22.8141533055409	0	19.7929734302303	15.2110404426309	10.1799878268298	2.19664499109792	11.3437406407496	21.4290208743031	18.3026215368342	0.528048053731854	16.6260951415764	0.834595328726706	14.4550390178103	16.026298817037	12.1338413972742	8.21148822583339	0	7.30538889504726	0	0	9.83814802184802	34.5406817492282	1.8281289698591	22.5939831356177	0	24.1130074137495	1.33414588444208	16.3278965222704	17.7815069782382	0.946735129093162	1.35925142748802	21.5420245317407	0
ENSG00000004809	0	0	0	29.1887532818052	0.848332318902482	0	14.1796758009371	3.78159191899467	2.81578792874373	0	0	0	0	0	0	0	3.31398703665967	0	15.3401030556215	0	0	0	0	9.88486762183276	3.20536557653991	12.9176825430801	0	1.16627832301931	0	13.2542918073043	0	0	5.09049719160975
ENSG00000004838	0	0	3.29882890503838	83.4551678338937	5.08999391341489	14.2781924421365	61.2561994600481	47.2698989874334	2.34648994061977	50.1645651045261	0.875057639030337	61.7600543257763	0	0	30.8012897007731	0	3.31398703665967	7.30538889504726	18.0471800654371	119.403568732396	24.2169797460874	2.20472436697202	0	15.5333634057372	0	26.6965439223655	1.33414588444208	76.9743693192747	6.27582599231937	65.3247239074282	1.35925142748802	1.43613496878271	15.2714915748292
ENSG00000004848	0	0	0	8.22218402304372	0	0	0	7.56318383798934	0	2.11219221492741	0	0.834595328726706	0.688335191324302	0	0	8.21148822583339	0	4.72701634385411	0	0	0	0	0	0	1.60268278826995	8.61178836205339	0	0	0	0	0	0	0
ENSG00000004864	4.56283066110819	12.0530363790169	3.29882890503838	13.9777128391743	25.4499695670745	14.2781924421365	25.5234164416867	26.4711434329627	37.0745410617924	41.7157962448164	56.8787465369719	20.8648832181677	56.4434856885928	24.7679163536026	22.4009379641986	24.6344646775002	6.62797407331934	45.1215196458802	52.7880016914035	0.374305858095287	12.1084898730437	56.5879254189484	0.914064484929551	39.539470487331	56.0938975894483	50.809551336115	14.6756047288629	30.3232363985022	65.8961729193534	19.8814377109564	1.35925142748802	4.30840490634814	5.09049719160975
ENSG00000004866	0	12.205606459764	9.89648671511513	4.93331041382623	11.8766524646348	3.29496748664687	4.53749625629986	18.2776942751409	5.1622778693635	0	23.6265562538191	0	4.13001114794581	0	2.80011724552482	0	0	4.72701634385411	15.7912825572575	12.5392462461921	8.32458678771756	7.34908122324005	0.914064484929551	1.41212394597611	3.20536557653991	7.75060952584805	0	20.9930098143477	1.56895649807984	9.46735129093162	1.35925142748802	0	0
ENSG00000004897	100.38227454438	126.022886697063	59.3789202906908	27.5443164771965	42.4166159451241	91.1607671305635	69.7640049406103	72.4805117807312	53.9692686342548	139.404686185209	69.1295534833966	125.189299309006	122.523664055726	43.7080876828281	61.6025794015461	73.9033940325005	19.883922219958	76.4917190187302	27.0707700981556	75.4226304062003	51.4610819604358	22.0472436697201	61.2423204902799	72.0183212447815	97.7636500844671	65.4495915516058	34.6877929954941	27.9906797524635	87.8615638924712	80.4724859729187	35.3405371146885	50.264723907395	20.361988766439
ENSG00000004961	45.6283066110819	61.9434527833022	16.4941445251919	51.7997593451754	53.4449360908564	76.8825746884271	58.4202642998607	28.9922047122925	41.298222954908	149.965647259846	22.7514986147888	2.50378598618012	37.8584355228366	42.979619554781	68.1361863077707	73.9033940325005	102.73359813645	35.6674869581719	81.2123102944669	36.4948211642905	20.4330766607613	33.0708655045802	52.1016756409844	50.8364620551399	64.1073115307981	78.3672740946859	28.0170635732837	54.8150811819078	15.6895649807984	71.9518698110803	239.228251237891	20.105889562958	5.09049719160975
ENSG00000004975	50.1911372721901	26.8523342114808	0	34.9442820979358	27.1466342048794	34.0479973620177	19.8515461213119	4.41185723882712	33.3201571568008	21.1219221492741	41.1277090344258	0.834595328726706	30.2867484182693	13.1124263048484	37.3348966069977	57.4804175808337	46.3958185132354	20.6269804095452	16.2424620588934	61.386160727627	45.4068370239139	3.67454061162003	36.562579397182	32.4788507574505	28.8482901888591	34.4471534482136	34.6877929954941	5.83139161509657	35.0400284571165	23.668378227329	4.07775428246406	41.6479140946987	10.1809943832195
ENSG00000005001	314.835315616465	285.000910835489	145.148471821689	195.276870547288	417.379500900021	191.108114225519	321.595047165252	231.93763769834	141.727992413434	597.222348770726	179.386816001219	217.82938079767	512.121382345281	261.520057968922	112.938062236168	1116.76239871334	811.926823981619	195.95631389068	687.146380991517	353.344730041951	808.998479642733	374.803142385243	917.720742869269	124.266907245898	387.849234761329	183.431092111737	500.30470666578	78.1406476422941	365.566864052603	202.601317625937	663.314696614153	315.949693132197	234.162870814048
ENSG00000005007	187.076057105436	230.838532170286	151.746129631765	300.109716841096	122.159853921957	190.00979172997	196.813900117006	216.181004702529	97.6139815297826	185.872914913612	61.2540347321236	321.319201559782	64.7035079844844	134.038135560673	151.20633125834	262.767623226668	566.691783268804	142.240219074156	281.536009020819	357.836400339094	301.198685591962	164.619419400577	266.906829599429	172.279121409085	160.268278826995	124.870931249774	172.104819093028	158.613851930627	169.970287291983	213.015404045961	203.887714123203	330.311042820024	330.882317454633
ENSG00000005020	98.100859213826	1.2205606459764	194.630905397264	92.0884610580896	4.24166159451241	50.5228347952521	6.80624438444979	6.30265319832445	27.6885812993133	1.05609610746371	48.1281701466685	47.5719337374223	17.2083797831076	14.5693625609427	9.33372415174941	205.287205645835	0	27.5026405460603	2.70707700981556	0	43.1364951727182	124.199472672757	2.74219345478865	91.788056488447	62.5046287425282	14.6400402154908	569.680292656768	192.435923298187	12.0286664852788	35.029199776447	206.606216978179	512.700183855429	503.959221969365
ENSG00000005022	365.026452888655	303.919600848123	42.8847757654989	143.477111202113	235.83638465489	253.712496471809	285.862264146891	172.062432314258	231.36390814511	576.628474675184	247.641311845585	319.650010902328	303.555819374017	219.268906542188	311.74638666843	229.921670323335	275.060924042753	345.501921859882	295.071394069896	302.626286270039	177.086664393264	124.934380795081	396.703986459425	237.236822923986	280.469487947242	410.782304869947	178.775548515239	96.8011008106031	289.733966645411	152.424355783999	207.965468405667	127.816012221662	96.7194466405852
ENSG00000005059	57.0353832638523	41.8042021246916	62.6777491957291	30.0109716841096	25.4499695670745	20.8681274154302	36.8671570824363	22.0592861941356	89.6359157316754	69.1742950388728	137.384049327763	22.5340738756211	64.0151727931601	29.1387251218854	40.1350138525225	73.9033940325005	0	36.0972157167041	10.3771285376263	83.470206355249	25.7305409802179	27.9265086483122	55.7579335807026	56.4849578390443	83.3395049900375	33.5859746120082	29.3512094577258	36.1546280135987	44.9767529449555	31.2422592600743	5.43700570995207	41.6479140946987	173.076904514731
ENSG00000005075	152.854827147124	5.95023314913494	72.5742359108443	18.0888048506962	21.2083079725621	43.9328998219583	20.4187331533494	18.9079595949734	20.649111477454	57.0291898030402	25.3766715318798	159.407707786801	35.1050947575394	54.6351096035352	24.2676827945485	0	79.5356888798321	44.691790887348	91.1382593304573	50.5312908428637	50.7043013433706	32.3359573822562	10.0547093342251	32.4788507574505	9.61609672961972	50.809551336115	112.068254293135	25.6581231064249	21.4424054737579	35.9759349055401	241.946754092867	81.8596932206147	117.081435407024
ENSG00000005100	77.5681212388392	31.8871468761334	0	45.2220121267404	36.4782897128067	39.5396098397625	36.8671570824363	63.0265319832445	58.1929505273704	35.907267653766	42.8778243124865	1.66919065745341	42.6767818621067	37.1518745304039	20.5341931338487	8.21148822583339	3.31398703665967	34.8080294411075	97.0035928517243	87.5875707942971	36.3254696191312	7.34908122324005	8.22658036436596	26.8303549735461	16.0268278826995	39.6142264654456	17.343896497747	26.8244014294442	51.2525789372749	31.2422592600743	1.35925142748802	2.87226993756543	86.5384522573657
ENSG00000005102	0	0	0	0	1.69666463780496	1.09832249554896	0	0	5.1622778693635	0	1.75011527806067	0	0	0	7.46697932139953	0	0	0	0	0	0	0	8.22658036436596	0	0	0	0	6.99766993811588	0	0	0	0	0
ENSG00000005108	57.0353832638523	59.9600417335906	0	33.7109544944792	11.0283201457323	0	39.7030922426238	8.19344915782179	71.8025921829651	1.05609610746371	2.62517291709101	95.9784628035712	19.9617205484048	64.833663396195	15.867331057974	8.21148822583339	92.7916370264708	9.45403268770822	28.4243086030634	0	67.3534749188057	0	14.6250317588728	52.248586001116	0	0	6.6707294222104	0	82.6317088988718	28.4020538727948	0	1.43613496878271	111.990938215414
ENSG00000005156	50.1911372721901	41.1939218017034	9.89648671511513	30.0109716841096	38.1749543506117	3.29496748664687	44.2405884989236	13.2355717164813	70.8639962067172	56.5011417493083	35.0023055612135	87.6325095163042	12.3900334438374	17.4832350731313	42.0017586828724	8.21148822583339	6.62797407331934	41.6836895776226	32.4849241177868	24.8913395633366	7.56780617065232	41.1548548501443	10.0547093342251	15.5333634057372	28.8482901888591	35.3083322844189	1.33414588444208	15.1616181992511	12.0286664852788	39.7628754219128	0	1.43613496878271	5.09049719160975
ENSG00000005175	100.38227454438	90.6266279637476	95.6660382461129	77.6996390177631	54.2932684097589	83.4725096617208	89.6155510619222	117.859614808667	93.390299636667	2.11219221492741	99.7565708494584	114.339560035559	101.185273124672	74.3037490608078	94.2706139326691	188.864229194168	56.3377796232144	92.8214118429535	82.5658487993747	66.4392898119134	35.5686890020659	64.6719147645124	45.7032242464775	115.794163570041	86.5448705665774	59.4213396981684	48.0292518399149	96.8011008106031	44.4537674455956	144.850474751254	180.780439855906	133.560552096792	193.43889328117
ENSG00000005187	2.28141533055409	0	0	0	0	2.19664499109792	9.6421795446372	0	0.469297988123955	59.1413820179676	0	0	0	0	0.933372415174941	0	0	3.86755882678973	0	0	0	0	3.6562579397182	4.23637183792833	0	0	1.33414588444208	0	0	0	2.71850285497604	4.30840490634814	5.09049719160975
ENSG00000005189	0	0	0	14.7999312414787	0	1.09832249554896	0	6.9329185181569	0.93859597624791	80.2633041672418	6.12540347321236	0	4.13001114794581	0	7.46697932139953	8.21148822583339	0	0.429728758532192	0.451179501635927	26.9500217828607	15.1356123413046	13.2283462018321	0	7.06061972988054	0	0	0	0	0.522985499359948	6.62714590365213	0	5.74453987513086	5.09049719160975
ENSG00000005194	2.28141533055409	4.11939218017034	0	41.5220293163708	18.6633110158546	25.261417397626	18.1499850251994	37.8159191899467	31.442965204305	1.05609610746371	40.2526513953955	17.5265019032608	13.766703826486	30.5956613779797	11.2004689820993	0	13.2559481466387	31.7999281313822	21.2054365768886	1.49722343238115	22.703418511957	18.3727030581001	3.6562579397182	32.4788507574505	3.20536557653991	0.861178836205339	5.33658353776832	19.8267314913283	9.93672448783901	3.78694051637265	1.35925142748802	0	10.1809943832195
ENSG00000005206	27.3769839666491	57.6714905223848	79.171893720921	161.154806851657	47.506609858539	88.9641221394656	110.034284215272	95.8003286145317	88.6973197554275	220.724086459915	42.0027666734562	29.2108365054347	27.5334076529721	76.4891534449492	118.538296727218	8.21148822583339	26.5118962932774	53.716094816524	114.599593415526	52.9642789204831	108.976408857393	13.2283462018321	72.2110943094345	50.8364620551399	41.6697524950188	56.8378031895524	32.0195012266099	26.8244014294442	50.7295934379149	60.5910482619623	6.79625713744009	64.6260735952222	45.8144747244877
ENSG00000005238	86.6937825610556	5.64509298764084	26.390631240307	57.555288161306	33.0849604371968	24.1630949020771	14.7468628329745	3.15132659916223	7.97806579810723	17.953633826883	14.0009222244854	121.850917994099	24.7800668876749	29.1387251218854	1.86674483034988	246.344646775002	82.8496759164917	21.4864379266096	9.9259490359904	0.187152929047643	56.0017656628272	66.8766391314845	11.8828383040842	8.47274367585665	14.4241450944296	24.9741862499548	100.060941333156	15.1616181992511	15.1665794814385	32.1889943891675	231.072742672963	78.9874232830493	264.705853963707
ENSG00000005243	0	0	0	1.64443680460874	0.848332318902482	16.4748374332344	12.4781147048246	0.630265319832445	15.0175356199666	0	4.37528819515168	0	0	0	20.5341931338487	0	0	0	0	0	15.1356123413046	0	0	0	0	2.58353650861602	0	5.83139161509657	8.36776798975916	0	0	8.61680981269629	0
ENSG00000005249	193.920303097098	185.067507946171	26.390631240307	201.854617765723	138.278167981105	230.647724065281	229.71074797518	222.483657900853	191.942877142698	208.05093317035	77.8801298737	133.535252596273	199.617205484048	228.010524078753	173.607269222539	131.383811613334	59.651766659874	325.304670208869	102.417746871355	0.935764645238217	127.139143666959	99.2125965137407	190.125412865347	289.485408925102	65.7099943190681	119.703858232542	74.7121695287565	90.9697091955065	237.958402208776	104.140864200248	63.8848170919369	44.5201840322641	71.2669606825364
ENSG00000005302	27.3769839666491	0.15257008074705	115.459011676343	124.977197150265	80.5915702957358	56.0144472729969	41.4046533387362	61.1357360237472	47.8683947886434	32.7389793313749	71.7547264004876	85.128723530124	33.0400891835665	96.1577929022219	19.6008207186738	32.8459529033335	0	19.7675228924808	8.57241053108262	4.67882322619108	27.2441022143484	38.2152223608483	18.281289698591	84.7274367585665	36.8617041302089	27.5577227585709	250.819426275111	73.4755343502168	32.9480864596767	17.0412323236769	5.43700570995207	104.837852721138	30.5429831496585
ENSG00000005339	214.453041072085	160.046014703655	448.640731085219	200.621290162267	163.728137548179	235.041014047477	64.659321652273	64.2870626229094	127.649052769716	16.3694896656875	184.637161835401	230.348310728571	90.8602452548079	72.1183446766664	116.671551896868	484.47780532417	53.0237925865547	109.151104667177	111.441336904074	24.3298807761936	134.706949837611	174.908133113113	63.070449460139	120.030535407969	145.844133732566	88.70142012915	538.994937314601	184.271975037052	102.50515787455	209.228463529589	5.43700570995207	280.046318912629	493.778227586145
ENSG00000005379	0	0.15257008074705	0	61.6663801728279	8.48332318902482	28.5563848842729	43.1062144348487	39.0764498296116	9.85525775060305	81.8474483284373	0.875057639030337	0.834595328726706	8.94835748721593	0	66.2694414774208	0	0	10.7432189633048	61.811591724122	64.006301734294	30.2712246826093	6.61417310091605	3.6562579397182	19.7697352436655	19.2321934592394	19.8071132327228	4.00243765332624	18.660453168309	8.36776798975916	32.1889943891675	39.4182913971525	17.2336196253926	10.1809943832195
ENSG00000005381	0	0	0	0	0	0	0	0	0	0.528048053731854	0	0	0	0	0	0	29.825883329937	0	0.451179501635927	0	5.29746431945663	22.7821517920442	0	4.23637183792833	1.60268278826995	0	1.33414588444208	0	0	0	0	27.2865644068716	0
ENSG00000005421	0	0	0	0	0	1.09832249554896	0	0	0	0	0	0	0	0	1.86674483034988	0	0	0	0	0	5.29746431945663	19.1076111804241	0	0	0	0	0	0	0	14.2010269363974	0	0	0
ENSG00000005436	0	0	6.59765781007675	8.6332932241959	3.39332927560993	9.88490245994062	12.4781147048246	3.78159191899467	1.87719195249582	20.0658260418104	22.7514986147888	2.50378598618012	0	14.5693625609427	3.73348966069977	0	0	3.00810130972534	8.12123102944669	40.9864914614339	0.756780617065232	15.4330705688041	21.0234831533797	2.82424789195222	9.61609672961972	5.16707301723204	1.33414588444208	23.3255664603863	0.522985499359948	1.89347025818632	1.35925142748802	0	0
ENSG00000005448	43.3468912805278	4.57710242241149	95.6660382461129	145.532657207874	9.33165550792731	25.261417397626	125.915521112321	47.9001643072658	29.5657732518092	165.807088871802	2.62517291709101	192.791520935869	0.688335191324302	0.728468128047135	89.6037518567944	8.21148822583339	0	12.8918627559658	78.0540537830154	193.141822777168	93.0840158990236	5.14435685626804	7.31251587943641	60.7213296769727	24.0402418240493	24.1130074137495	2.66829176888416	55.9813595049271	13.0746374839987	69.1116644238008	2.71850285497604	7.18067484391357	15.2714915748292
ENSG00000005469	77.5681212388392	102.221954100523	3.29882890503838	40.2887017129142	105.193207543908	36.2446423531156	64.659321652273	53.5725521857578	31.9122631924289	20.5938740955423	96.256340293337	7.51135795854036	58.5084912625657	112.184091719259	74.6697932139953	0	9.94196110997901	71.764702674876	41.0573346488694	51.0927496300067	96.8679189843497	33.8057736269042	106.031480251828	43.7758423252594	28.8482901888591	72.3390222412485	24.0146259199574	46.6511329207726	103.55112887327	29.348789001888	86.9920913592332	1.43613496878271	10.1809943832195
ENSG00000005471	2.28141533055409	0	0	0	4.24166159451241	8.78657996439166	0	0	0	0	0	0	13.0783686351617	0	0	0	0	0.429728758532192	0	0	0	0	0.914064484929551	8.47274367585665	0	0	0	0	0.522985499359948	0	0	0	341.063311837853
ENSG00000005483	339.93088425256	209.631290946446	953.361553556091	452.220121267404	481.004424817708	303.137008771512	174.693605867545	306.308945438568	273.131429088142	144.685166722528	374.524669504984	276.25105380854	273.269070955748	408.670619834443	218.409145150936	550.169711130837	261.804975896114	299.091215938406	198.518980719808	166.75325978145	252.764726099788	399.055110421935	302.555344511681	367.152225953788	331.75533717188	175.680482585889	972.592349758277	410.529969702799	208.148228745259	342.718116731724	247.383759802819	824.341472081278	977.375460789071
ENSG00000005486	269.207009005383	131.667979684704	125.355498391458	125.388306351417	78.0465733390284	181.223211765578	155.40924677827	98.9516552136939	115.447305078493	252.406969683826	101.506686127519	90.970890831211	144.550390178103	119.46877299973	128.805393294142	8.21148822583339	271.746937006093	97.5484281868076	141.219184012045	170.683471291451	181.627348095656	163.149603155929	232.172379172106	97.4365522723515	83.3395049900375	85.2567047843286	92.0560660265036	103.798770748719	131.269360339347	112.661480362086	114.177119908994	186.697545941753	239.253368005658
ENSG00000005700	54.7539679332982	257.233156139526	260.607483498032	105.655064696112	343.574589155505	262.499076436201	252.965416288717	262.190373050297	237.464781990721	138.348590077746	134.758876410672	362.21437266739	252.619015216019	236.752141615319	149.339586427991	123.172323387501	99.4196110997901	259.985898911976	215.663801781973	221.027609205267	149.842562178916	133.753278262969	308.953795906188	251.358062383747	270.853391217622	212.711172542719	185.446277937449	149.283625346472	224.360779225418	251.831544338781	99.2253542066254	35.9033742195679	152.714915748292
ENSG00000005801	45.6283066110819	30.0563059071688	0	2.05554600576093	5.93832623231738	26.359739893175	18.1499850251994	3.78159191899467	22.5263034299498	0.528048053731854	18.3762104196371	93.4746768173911	15.1433742091347	41.5226832986867	17.7340758883239	0	0	26.6431830289959	17.1448210621652	0.374305858095287	34.0551277679355	0.734908122324005	7.31251587943641	21.1818591896416	9.61609672961972	43.058941810267	10.6731670755366	3.49883496905794	6.27582599231937	13.2542918073043	10.8740114199041	15.7974846566099	5.09049719160975
ENSG00000005810	175.668980452665	112.139009349082	112.160182771305	158.688151644744	125.553183197567	104.340637077151	215.531072174243	141.179431642468	136.565714544071	20.5938740955423	114.632550712974	44.2335524225154	99.1202675506995	198.871798956868	210.942165829537	49.2689293550003	39.767844439916	111.72947721837	132.646773480963	178.731047240499	110.489970091524	96.2729640244447	86.8361260683073	79.0789409746621	113.790477967167	104.202639180846	105.397524870924	141.119677085337	112.964867861749	113.608215491179	72.040325656865	84.7319631581802	101.809943832195
ENSG00000005812	0	22.1226617083222	49.4824335755756	41.5220293163708	22.904972610367	19.7698049198812	53.8827680435608	66.1778585824067	32.8508591686768	97.1608418866611	25.3766715318798	3.33838131490682	34.4167595662151	18.9401713292255	23.3343103793735	0	3.31398703665967	27.0729117875281	27.0707700981556	70.1823483928663	46.1636176409792	17.6377949357761	21.0234831533797	28.2424789195222	43.2724352832887	13.7788613792854	20.0121882666312	60.6464727970043	8.89075348911911	20.8281728400496	0	28.7226993756543	15.2714915748292
ENSG00000005844	36.5026452888655	0.15257008074705	52.781262480614	25.0776612702833	8.48332318902482	48.3261898041541	9.07499251259972	6.30265319832445	0.469297988123955	0.528048053731854	12.2508069464247	20.8648832181677	29.598413226945	1.45693625609427	4.66686207587471	139.595299839168	3.31398703665967	1.28918627559658	0	0.187152929047643	12.865270490109	31.6010492599322	18.281289698591	5.64849578390443	30.4509729771291	2.58353650861602	126.743859021998	29.1569580754829	0	23.668378227329	1.35925142748802	91.9126380020937	162.895910131512
ENSG00000005882	0	14.6467277517168	0	14.3888220403265	9.33165550792731	4.39328998219583	13.6124887688996	11.9750410768165	20.649111477454	30.0987390627157	9.6256340293337	0	16.5200445917833	26.953320737744	6.53360690622459	0	3.31398703665967	6.87566013651507	35.6431806292383	0	7.56780617065232	2.20472436697202	1.8281289698591	1.41212394597611	4.80804836480986	0	0	1.16627832301931	26.6722604673573	15.1477620654906	1.35925142748802	0	5.09049719160975
ENSG00000005884	4.56283066110819	14.4941576709697	0	46.0442305290448	23.7533049292695	36.2446423531156	23.8218553455743	8.19344915782179	15.9561315962145	0	62.1290923711539	0	19.2733853570805	0	17.7340758883239	8.21148822583339	9.94196110997901	33.9485719240432	18.0471800654371	0.187152929047643	1.51356123413046	2.20472436697202	77.6954812190118	18.3576112976894	8.01341394134976	15.5012190516961	6.6707294222104	9.33022658415451	28.7642024647971	14.2010269363974	50.2923028170567	18.6697545941753	30.5429831496585
ENSG00000005889	52.4725526027442	48.974995919803	0	25.8998796725877	26.298301885977	53.8178022818989	60.1218253959731	54.8330828254227	52.561374669883	114.586427659812	44.6279395905472	116.008750693012	51.6251393493227	36.4234064023568	65.3360690622459	65.6919058066671	82.8496759164917	47.6998921970733	29.7778471079712	0.748611716190574	41.6229339385878	47.7690279510603	13.7109672739433	56.4849578390443	32.053655765399	24.9741862499548	45.3609600710307	45.4848545977533	50.7295934379149	44.4965510673786	4.07775428246406	86.1680981269629	5.09049719160975
ENSG00000005893	278.332670327599	278.592967444113	118.757840581382	283.254239593856	273.163006686599	294.350428807121	259.204473641129	221.853392581021	206.021816786416	251.878921630094	263.392349348131	162.746089101708	353.804288340691	246.950695407979	350.014655690603	361.305481936669	470.586159205673	267.721016565556	303.192625099343	200.253634080978	182.384128712721	343.20209312531	290.672506207597	292.309656817054	328.54997159534	363.417468878653	972.592349758277	328.890487091447	223.837793726058	189.347025818632	505.641531025543	772.6406132051	783.936567507901
ENSG00000006007	440.31315879694	464.728465955514	356.273521744145	311.620774473357	352.05791234453	445.918933192877	292.101321499303	340.34327270952	301.289308375579	634.185712531956	217.889352118554	317.980820244875	523.823080597794	644.694293321715	210.008793414362	32.8459529033335	265.118962932774	461.958415422106	287.852522043722	178.169588453357	324.658884720985	368.188969284327	489.02449943731	334.673375196338	173.089741133155	310.024381033922	174.773110861913	254.24867441821	505.20399238171	364.493024700867	441.756713933606	416.479140946987	356.334803412682
ENSG00000006015	6.84424599166228	39.82079107498	105.562524961228	60.0219433682191	19.5116433347571	19.7698049198812	80.5405585493225	42.2277764287738	33.3201571568008	38.0194598686935	23.6265562538191	19.1956925607142	68.1451839411059	21.8540438414141	44.8018759283972	57.4804175808337	102.73359813645	18.9080653754164	32.0337446161508	73.1767952576286	64.3263524505447	30.1312330152842	57.5860625505617	70.6061972988054	46.4778008598286	55.9766243533471	74.7121695287565	36.1546280135987	39.746897951356	20.8281728400496	5.43700570995207	14.3613496878271	0
ENSG00000006016	0	0.15257008074705	3.29882890503838	41.5220293163708	7.63499087012234	20.8681274154302	8.50780548056223	44.1185723882712	11.2631517149749	32.7389793313749	3.50023055612135	2.50378598618012	0	0	36.4015241918227	0	0	8.16484641211165	1.35353850490778	86.2775002909636	4.54068370239139	0	1.8281289698591	12.709115513785	9.61609672961972	4.3058941810267	5.33658353776832	33.8220713675601	8.89075348911911	4.73367564546581	33.9812856872005	27.2865644068716	0
ENSG00000006025	4.56283066110819	0.457710242241149	3.29882890503838	12.3332760345656	7.63499087012234	9.88490245994062	12.4781147048246	28.9922047122925	31.442965204305	0	11.3757493073944	20.0302878894409	16.5200445917833	2.18540438414141	17.7340758883239	8.21148822583339	29.825883329937	36.5269444752363	27.0707700981556	32.1903037961947	29.5144440655441	26.4566924036642	65.8126429149277	7.06061972988054	4.80804836480986	14.6400402154908	12.0073129599787	3.49883496905794	23.5343474711977	22.7216430982359	2.71850285497604	25.8504294380889	10.1809943832195
ENSG00000006042	66.1610445860687	147.077557840156	46.1836046705373	73.1774378050891	39.8716189884167	31.8513523709198	133.288952528808	158.196595277944	114.978007090369	227.060663104697	27.1267868099404	41.7297664363353	72.963530280376	31.3241295060268	172.673896807364	0	132.559481466387	105.713274598919	206.640211749255	120.339333377635	138.490852922938	17.6377949357761	116.086189586053	88.9638085964948	208.348762475094	169.652230732452	14.6756047288629	54.8150811819078	31.3791299615969	65.3247239074282	212.043222688131	24.4142944693061	15.2714915748292
ENSG00000006047	0	0	0	0	0	0	0	0	0.93859597624791	0	0	0	0	21.8540438414141	0	0	3.31398703665967	0	4.9629745179952	0	0	0	0	0	0	0	0	0	0	1.89347025818632	0	0	0
ENSG00000006062	0	7.01822371436429	23.0918023352686	7.81107482189153	3.39332927560993	12.0815474510385	0	11.9750410768165	10.793853726851	0.528048053731854	15.7510375025461	0.834595328726706	0	0	6.53360690622459	0	0	6.44593137798288	20.7542570752527	0	0	16.9028868134521	1.8281289698591	2.82424789195222	0	0	6.6707294222104	1.16627832301931	14.6435939820785	9.46735129093162	0	30.158834344437	111.990938215414
ENSG00000006118	70.7238752471769	12.8158867827522	19.7929734302303	0.822218402304372	7.63499087012234	23.0647724065281	8.50780548056223	0	42.7061169192799	0	26.2517291709101	0	8.26002229589163	12.3839581768013	24.2676827945485	0	0	25.3539967533993	0.451179501635927	10.1062581685727	21.9466378948917	22.7821517920442	18.281289698591	1.41212394597611	9.61609672961972	17.2235767241068	8.00487530665248	8.1639482611352	17.2585214788783	1.89347025818632	59.8070628094728	2.87226993756543	5.09049719160975
ENSG00000006125	38.7840606194196	21.6649514660811	151.746129631765	72.3552194027847	18.6633110158546	23.0647724065281	108.899910151197	114.708288209505	68.5175062660974	200.130212364373	36.7524208392741	111.001178720652	11.0133630611888	8.74161753656563	35.4681517766478	156.018276290834	46.3958185132354	125.4807974914	75.3469767731998	156.272695754782	115.787434410981	83.0446178226126	98.7189643723915	111.557791732113	75.3260910486878	43.058941810267	46.6951059554728	68.8104210581395	24.5803184699175	126.862507298484	27.1850285497604	145.049631847054	274.886848346926
ENSG00000006194	36.5026452888655	28.9883153419395	32.9882890503838	36.5887189025445	17.8149786969521	35.1463198575667	27.7921645698366	31.5132659916223	11.2631517149749	60.7255261791632	7.87551875127303	0.834595328726706	10.3250278698645	7.28468128047135	14.0005862276241	0	36.4538574032564	12.0324052389014	28.4243086030634	44.5423971133391	1.51356123413046	25.7217842813402	0	52.248586001116	30.4509729771291	30.1412592671869	57.3682730310095	9.33022658415451	26.1492749679974	12.3075566782111	36.6997885421765	35.9033742195679	86.5384522573657
ENSG00000006210	27.3769839666491	15.8672883976932	0	20.5554600576093	16.9666463780496	32.9496748664687	31.762473794099	19.5382249148058	16.4254295843384	22.7060663104697	1.75011527806067	1.66919065745341	8.26002229589163	0.728468128047135	43.8685035132222	0	33.1398703665967	24.4945392363349	74.444617769928	37.243432880481	33.2983471508702	0	77.6954812190118	7.06061972988054	25.6429246123192	5.16707301723204	14.6756047288629	16.3278965222704	1.56895649807984	20.8281728400496	48.9330513895687	1.43613496878271	5.09049719160975
ENSG00000006282	0	49.8904164042853	3.29882890503838	14.7999312414787	6.78665855121986	12.0815474510385	22.1202942494618	23.3198168338005	8.91666177435514	0	17.5011527806067	3.33838131490682	20.6500557397291	52.4497052193937	5.60023449104965	0	36.4538574032564	15.8999640656911	2.25589750817964	40.9864914614339	31.7847859167398	2.93963248929602	3.6562579397182	11.2969915678089	0	3.44471534482136	0	5.83139161509657	14.6435939820785	14.2010269363974	2.71850285497604	35.9033742195679	5.09049719160975
ENSG00000006327	2.28141533055409	40.5836414787152	9.89648671511513	9.04440242534809	54.2932684097589	97.7507021038573	22.1202942494618	32.1435313114547	86.8201278029317	7.9207208059778	49.0032277856988	9.18054861599377	31.6634188009179	99.8001335424575	42.0017586828724	114.960835161667	139.187455539706	103.134902047726	53.2391811930394	58.2045609338171	98.3814802184802	48.5039360733843	141.67999516408	73.4304451907576	16.0268278826995	11.1953248706694	106.731670755366	48.9836895668112	54.9134774327945	53.9639023583102	299.035314047364	157.974846566099	305.429831496585
ENSG00000006432	125.477843180475	26.3946239692396	13.1953156201535	4.11109201152186	13.5733171024397	21.9664499109792	4.53749625629986	15.7566329958111	7.03946982185932	53.8609014806491	8.75057639030337	0.834595328726706	15.831709400459	0	6.53360690622459	16.4229764516668	0	12.8918627559658	6.76769252453891	0	13.6220511071742	15.4330705688041	48.4454177012662	11.2969915678089	11.2187795178897	31.8636169395976	20.0121882666312	16.3278965222704	32.9480864596767	14.2010269363974	59.8070628094728	4.30840490634814	5.09049719160975
ENSG00000006451	54.7539679332982	142.958165659986	112.160182771305	91.6773518569374	148.458155807934	102.143992086053	96.9889824784095	54.8330828254227	84.4736378623119	93.4645055105381	168.886124332855	145.219587198447	77.7818766196462	134.038135560673	99.8708484237187	188.864229194168	255.177001822795	192.518483822422	101.96656736972	22.6455044147649	205.087547224678	174.908133113113	155.390962438024	121.442659353945	137.830719791216	68.8943068964272	180.109694399681	118.96038894797	227.498692221577	142.957004493067	150.87690845117	146.485766815837	25.4524859580487
ENSG00000006453	104.945105205488	112.596719591323	128.654327296497	151.288186024004	105.193207543908	137.29031194362	115.706154535646	145.591288881295	100.429769458526	146.269310883723	93.631167376246	157.738517129347	51.6251393493227	82.3168984693263	118.538296727218	114.960835161667	208.781183309559	91.9619543258891	115.050772917161	242.175890187651	180.113786861525	116.115483327193	178.242574561262	103.085048056256	52.8885320129084	107.647354525667	76.0463154131986	89.8034308724872	106.166056370069	126.862507298484	188.935948420835	77.5512883142666	5.09049719160975
ENSG00000006459	75.2867059082851	85.896955460589	23.0918023352686	121.688323541047	136.5815033433	155.961794367952	95.287421382297	120.380676087997	76.0262740760807	3.16828832239112	102.381743766549	84.2941282013973	110.133630611888	200.328735212962	138.139117445891	804.725846131672	129.245494429727	157.710454381314	200.774878227988	29.7573157185753	88.5433321966322	133.753278262969	161.78941383253	94.6123043803993	86.5448705665774	99.8967449998194	58.7024189154515	59.480194473985	111.395911363669	94.6735129093162	6.79625713744009	152.230306690968	40.723977532878
ENSG00000006468	0	0	9.89648671511513	0	0	0	9.07499251259972	0	0.469297988123955	63.3657664478224	12.2508069464247	0	0.688335191324302	0.728468128047135	6.53360690622459	0	0	16.7594215827555	40.6061551472335	0	1.51356123413046	0	1.8281289698591	0	0	0	12.0073129599787	1.16627832301931	0.522985499359948	7.57388103274529	1.35925142748802	4.30840490634814	0
ENSG00000006530	0	31.7345767953864	0	14.7999312414787	7.63499087012234	4.39328998219583	10.2093665766747	1.26053063966489	14.5482376318426	59.1413820179676	4.37528819515168	0	0	0	7.46697932139953	0	0	10.3134902047726	12.633026045806	0	7.56780617065232	0	0	5.64849578390443	0	0	4.00243765332624	6.99766993811588	10.459709987199	14.2010269363974	1.35925142748802	0	0
ENSG00000006534	127.759258511029	77.0478907772602	237.515681162763	416.864729968316	161.183140591472	168.043341818991	271.682588345954	295.594435001417	107.469239280386	666.924691863331	64.7542652882449	149.39256384208	72.2751950890517	270.990143633534	165.206917485965	32.8459529033335	169.013338869643	139.661846522962	431.327603563946	740.18983438343	217.196037097722	235.170599143682	209.320767048867	221.703459518249	48.0804836480986	172.235767241068	33.353647111052	164.445243545723	157.941620806704	331.357295182607	286.802051199972	68.9344785015703	50.9049719160975
ENSG00000006555	18.2513226444327	17.3929892051637	0	4.11109201152186	19.5116433347571	7.68825746884271	19.8515461213119	15.7566329958111	15.0175356199666	24.8182585253971	7.87551875127303	56.752482353416	4.81834633927012	0	13.0672138124492	0	0	12.8918627559658	3.15825651145149	16.282304827145	37.8390308532616	23.5170599143682	0	5.64849578390443	12.8214623061596	11.1953248706694	5.33658353776832	2.33255664603863	17.2585214788783	19.8814377109564	0	20.105889562958	5.09049719160975
ENSG00000006576	50.1911372721901	36.769389460039	19.7929734302303	18.9110232530006	33.0849604371968	28.5563848842729	79.973371517285	89.4976754162072	35.6666470974206	13.2012013432963	57.7538041760022	50.0757197236024	91.5485804461322	0	28.9345448704232	0	6.62797407331934	102.705173289194	7.21887202617484	0.56145878714293	93.8407965160888	27.1916005259882	53.0157401259139	55.0728338930682	19.2321934592394	56.8378031895524	24.0146259199574	38.4871846596374	48.1146659411152	54.9106374874034	2.71850285497604	21.5420245317407	20.361988766439
ENSG00000006606	15.9699073138787	0	0	6.16663801728279	21.2083079725621	0	0	10.7145104371516	0.469297988123955	0	7.00046111224269	0	0	0	0	0	0	7.73511765357946	0	0	1.51356123413046	9.55380559021206	6.39845139450686	0	0	11.1953248706694	42.6926683021466	0	0.522985499359948	0	0	0	0
ENSG00000006607	0	19.6815404163694	13.1953156201535	45.2220121267404	45.8099452207341	60.4077372551927	22.6874812814993	14.4961023561462	22.5263034299498	27.4584987940564	43.7528819515168	95.9784628035712	57.8201560712414	72.1183446766664	13.0672138124492	8.21148822583339	49.709805549895	45.9809771629445	64.0674892323017	0.187152929047643	29.5144440655441	10.2887137125361	11.8828383040842	9.88486762183276	43.2724352832887	66.3107703878111	28.0170635732837	16.3278965222704	46.5457094430354	35.029199776447	4.07775428246406	4.30840490634814	249.434362388878
ENSG00000006611	0	0	128.654327296497	23.8443336668268	1.69666463780496	0	5.67187032037482	9.45397979748668	0.469297988123955	48.0523728895987	0	0	0	0	0	0	0	4.29728758532192	0	0	8.32458678771756	0	0	15.5333634057372	0	0	0	1.16627832301931	0	0	2.71850285497604	0	0
ENSG00000006625	134.603504502692	127.090877262292	46.1836046705373	78.1107482189153	144.216494213422	71.3909622106823	90.1827380939597	64.9173279427418	135.157820579699	112.474235444885	183.762104196371	163.580684430434	158.31709400459	43.7080876828281	158.67331057974	24.6344646775002	115.989546283088	190.369840029761	121.367285940064	38.1791975257193	43.8932757897835	134.488186385293	61.2423204902799	93.2001804344231	76.9287738369577	161.040442370398	42.6926683021466	116.627832301931	99.89023037775	160.944971945837	4.07775428246406	94.7849079396591	157.805412939902
ENSG00000006634	22.8141533055409	25.1740633232632	3.29882890503838	0	15.2699817402447	42.8345773264094	3.40312219222489	16.3868983156436	11.2631517149749	0	21.8764409757584	5.00757197236024	33.0400891835665	0.728468128047135	19.6008207186738	0	0	23.2053529607384	4.06061551472335	0	13.6220511071742	0.734908122324005	25.5938055780274	31.0667268114744	19.2321934592394	24.1130074137495	30.6853553421678	33.8220713675601	24.0573329705576	21.7749079691427	0	7.18067484391357	10.1809943832195
ENSG00000006652	59.3167985944064	25.9369137269985	141.84964291665	226.932279036007	61.9282592798812	217.467854118694	21.5531072174243	39.706715149444	65.2324203492297	10.0329130209052	114.632550712974	104.324416090838	73.6518654717003	76.4891534449492	24.2676827945485	394.151434840003	248.549027749475	45.5512484044123	50.0809246815879	0.935764645238217	121.084898730437	413.018364746091	124.312769950419	200.521600328607	120.201209120246	43.058941810267	553.670542043463	348.717218582775	119.240693854068	126.862507298484	266.413279787652	751.09858867336	641.402646142828
ENSG00000006695	0	0.15257008074705	0	0.411109201152186	11.0283201457323	5.49161247774479	4.53749625629986	11.344775756984	12.6710456793468	0	2.62517291709101	34.218408477795	4.81834633927012	16.7547669450841	30.8012897007731	0	0	11.6026764803692	28.8754881046993	6.92465837476281	4.54068370239139	0	18.281289698591	12.709115513785	4.80804836480986	24.9741862499548	2.66829176888416	13.9953398762318	24.5803184699175	13.2542918073043	1.35925142748802	1.43613496878271	5.09049719160975
ENSG00000006704	141.447750494354	74.7593395660544	0	36.9998281036967	61.9282592798812	37.3429648486646	21.5531072174243	52.9422868659254	36.6052430736685	1.05609610746371	57.7538041760022	35.8875991352484	47.4951282013769	0.728468128047135	38.2682690221726	41.0574411291669	109.361572209769	57.1539248847815	69.0304637502969	21.7097397695266	13.6220511071742	97.0078721467687	104.203351281969	26.8303549735461	24.0402418240493	43.058941810267	12.0073129599787	23.3255664603863	54.3904919334346	58.697578003776	1.35925142748802	14.3613496878271	20.361988766439
ENSG00000006712	61.5982139249605	75.3696198890426	108.861353866266	64.133035379741	50.8999391341489	54.9161247774479	55.0171421076358	54.8330828254227	40.8289249667841	103.497418531443	22.7514986147888	35.8875991352484	61.2618320278629	8.74161753656563	53.2022276649717	82.1148822583339	49.709805549895	15.8999640656911	54.1415401963113	0.935764645238217	49.1907401092401	46.2992117064123	25.5938055780274	64.957701514901	70.5180426838779	31.0024381033922	150.758484941955	86.3045959034292	40.7928689500759	44.4965510673786	193.013702703299	70.370613470353	25.4524859580487
ENSG00000006715	25.095568636095	81.6249931996716	79.171893720921	44.3997937244361	56.8382653664663	52.71947978635	43.6734014668861	12.6053063966489	56.7850565629985	70.7584392000684	107.632089600731	2.50378598618012	15.1433742091347	61.1913227559594	28.9345448704232	16.4229764516668	6.62797407331934	47.2701634385411	24.814872589976	166.378953923355	20.4330766607613	103.622045247685	35.6485149122525	39.539470487331	46.4778008598286	112.814427542899	92.0560660265036	162.112686899685	51.7755644366348	68.1649292947076	10.8740114199041	57.4453987513086	122.171932598634
ENSG00000006740	0	11.2901859752817	19.7929734302303	64.133035379741	22.0566402914645	14.2781924421365	17.0156109611245	0	11.2631517149749	0.528048053731854	0	0	1.3766703826486	0	1.86674483034988	82.1148822583339	115.989546283088	16.3296928242233	12.18184654417	13.8493167495256	5.29746431945663	0	0	16.9454873517133	14.4241450944296	31.0024381033922	0	23.3255664603863	0	0	1.35925142748802	10.052944781479	0
ENSG00000006744	22.8141533055409	38.4476603482565	69.2754070058059	50.9775409428711	47.506609858539	14.2781924421365	46.5093366270736	44.7488377081036	17.3640255605863	38.5475079224253	40.2526513953955	2.50378598618012	53.6901449232956	10.1985537926599	49.4687380042719	8.21148822583339	3.31398703665967	30.5107418557856	44.6667706619568	0.187152929047643	0.756780617065232	34.5406817492282	29.2500635177456	63.5455775689249	48.0804836480986	20.6682920689281	5.33658353776832	34.9883496905794	59.620346927034	26.5085836146085	17.6702685573442	12.9252147190444	5.09049719160975
ENSG00000006747	13.6884919833246	146.619847597915	23.0918023352686	108.532829104177	101.799878268298	83.4725096617208	108.899910151197	212.399412783534	99.0218754941545	362.769012913783	91.8810520981853	53.4141010385092	72.2751950890517	144.236689353333	78.4032828746951	8.21148822583339	129.245494429727	75.6322615016658	167.387595106929	174.426529872404	75.6780617065232	60.2624660305684	91.4064484929551	129.915403029802	65.7099943190681	187.736986292764	14.6756047288629	95.6348224875838	106.166056370069	107.92780471662	9.51475999241613	14.3613496878271	35.6334803412682
ENSG00000006756	214.453041072085	292.781984953589	184.734418682149	256.943250720116	95.013219717078	194.403081712166	306.28099730024	284.249659244433	267.499853230654	124.619340680717	140.884279883884	258.724551905279	117.705317716456	161.719924426464	248.277062436534	57.4804175808337	238.607066639496	213.145464231967	258.525854437386	128.199756397636	113.517092559785	80.1049853333165	109.687738191546	258.418682113628	108.982429602357	105.063818017051	44.0268141865887	94.4685441645644	77.9248394046322	136.329858589415	101.943857061601	84.7319631581802	55.9954691077072
ENSG00000006757	0	56.1457897149143	0	20.1443508564571	8.48332318902482	19.7698049198812	45.9421495950361	17.6474289553085	24.4034953824457	48.0523728895987	8.75057639030337	45.0681477512421	26.1567372703235	7.28468128047135	24.2676827945485	0	0	23.6350817192706	22.5589750817964	23.2069632019078	7.56780617065232	0.734908122324005	29.2500635177456	35.3030986494027	1.60268278826995	49.9483724999097	1.33414588444208	1.16627832301931	24.5803184699175	12.3075566782111	0	21.5420245317407	0
ENSG00000006831	25.095568636095	229.160261282069	52.781262480614	96.6106622707637	106.889872181713	104.340637077151	55.0171421076358	163.238717836603	183.96481134459	49.1084689970624	112.007377795883	100.986034775931	110.133630611888	177.746223243501	109.204572575468	8.21148822583339	115.989546283088	118.605137354885	98.8083108582681	19.0895987628596	161.194271434894	249.868761590162	224.85986329267	107.321419894184	105.777064025817	87.8402412929446	102.72923310204	129.456893855144	145.912954321425	136.329858589415	99.2253542066254	112.018527565052	127.262429790244
ENSG00000006837	0	0	0	1.64443680460874	0	3.29496748664687	0	0	0	0	7.00046111224269	0	8.94835748721593	0	0	0	0	7.30538889504726	0.451179501635927	2.05868221952408	6.81102555358709	0	0	8.47274367585665	0	1.72235767241068	1.33414588444208	0	13.5976229833586	2.84020538727948	0	0	0
ENSG00000007038	2.28141533055409	0	0	0	0	0	0	0	0	0	0	0	0	0	0	0	0	0	4.51179501635927	0	0.756780617065232	7.34908122324005	0	0	0	0	0	0	0.522985499359948	2.84020538727948	0	0	0
ENSG00000007047	31.9398146277573	35.0911185718215	85.7695515309978	13.5666036380221	30.5399634804894	48.3261898041541	31.1952867620615	0	38.0131370380403	46.4682287284031	14.8759798635157	1.66919065745341	72.2751950890517	12.3839581768013	16.8007034731489	0	0	8.16484641211165	14.8889235539856	4.86597615523873	33.2983471508702	0.734908122324005	31.9922569725343	7.06061972988054	12.8214623061596	6.02825185343738	9.33902119109456	12.8290615532125	16.2125504801584	9.46735129093162	70.681074229377	18.6697545941753	152.714915748292
ENSG00000007062	15.9699073138787	64.8422843174962	112.160182771305	195.276870547288	34.7816250750018	46.1295448130562	178.096728059769	187.819065310069	60.5394404679902	560.787033063229	30.6270173660618	275.416458479813	46.1184578187283	98.3431972863633	210.008793414362	16.4229764516668	238.607066639496	53.716094816524	176.411185139648	85.1545827166778	106.706067006198	20.5774274250721	123.398705465489	70.6061972988054	94.5582845079272	113.675606379105	26.6829176888416	86.3045959034292	15.1665794814385	120.235361394832	85.6328399317452	18.6697545941753	96.7194466405852
ENSG00000007080	27.3769839666491	31.5820067146393	36.2871179554221	21.7887876610659	35.6299573939043	38.4412873442135	15.314049865012	27.7316740726276	28.1578792874373	4.22438442985483	15.7510375025461	3.33838131490682	12.3900334438374	74.3037490608078	51.3354828346218	8.21148822583339	76.2217018431724	24.4945392363349	25.7172315932479	0.748611716190574	31.0280052996745	11.0236218348601	74.0392232792936	29.6546028654983	14.4241450944296	35.3083322844189	5.33658353776832	18.660453168309	25.1033039692775	61.5377833910555	70.681074229377	7.18067484391357	10.1809943832195
ENSG00000007129	0	0.15257008074705	6.59765781007675	0.411109201152186	0	0	0	0	0	0	0	22.5340738756211	0	0	0	49.2689293550003	0	0	0	0	0	38.2152223608483	0.914064484929551	0	3.20536557653991	0	17.343896497747	0	0	1.89347025818632	1.35925142748802	0	0
ENSG00000007168	157.417657808232	159.740874542161	89.0683804360362	100.721754282286	97.5582166737855	108.733927059347	145.199880201595	154.415003358949	160.499911938393	177.424146053903	114.632550712974	136.039038582453	191.357183188156	134.038135560673	126.938648463792	0	135.873468503046	196.815771407744	113.697234412254	329.5763080529	140.761194774133	153.595797565717	134.367479284644	141.212394597611	153.857547673915	160.179263534193	245.482842737343	88.6371525494679	96.2293318822304	135.383123460322	58.4478113819848	96.2210429084419	15.2714915748292
ENSG00000007171	0	6.10280322988199	16.4941445251919	3.28887360921749	5.08999391341489	6.58993497329375	7.94061844852475	4.41185723882712	0	0	15.7510375025461	0.834595328726706	15.1433742091347	36.4234064023568	12.1338413972742	0	0	7.30538889504726	0	23.9555749180984	0	0	22.8516121232388	2.82424789195222	35.259021341939	66.3107703878111	2.66829176888416	3.49883496905794	0.522985499359948	8.52061616183845	2.71850285497604	1.43613496878271	0
ENSG00000007174	2.28141533055409	0	0	144.710438805569	3.39332927560993	5.49161247774479	36.8671570824363	112.817492250008	2.34648994061977	100.329130209052	0	110.166583391925	0	0	44.8018759283972	0	69.5937277698531	20.197251651013	49.1785656783161	100.313969969537	39.3525920873921	1.46981624464801	0	12.709115513785	0	17.2235767241068	5.33658353776832	17.4941748452897	0.522985499359948	30.2955241309812	4.07775428246406	1.43613496878271	15.2714915748292
ENSG00000007202	45.6283066110819	81.6249931996716	138.550814011612	104.421737092655	83.1365672524433	20.8681274154302	69.1968179085728	61.1357360237472	113.100815137873	88.7120730269514	55.1286312589112	116.008750693012	81.911887767592	109.27021920707	75.6031656291702	16.4229764516668	23.1979092566177	69.1863301236829	43.313232157049	12.7263991752398	75.6780617065232	121.994748305785	105.117415766898	111.557791732113	115.393160755437	82.6731682757126	34.6877929954941	109.630162363816	120.809650352148	74.7920751983598	5.43700570995207	18.6697545941753	30.5429831496585
ENSG00000007216	0	12.9684568634992	0	3.28887360921749	5.08999391341489	0	5.10468328833734	7.56318383798934	1.40789396437186	8.97681691344151	2.62517291709101	0	0.688335191324302	2.18540438414141	22.4009379641986	0	9.94196110997901	4.29728758532192	0.451179501635927	53.9000435657213	0	0	4.57032242464775	2.82424789195222	12.8214623061596	0.861178836205339	0	8.1639482611352	9.93672448783901	0.946735129093162	2.71850285497604	0	0
ENSG00000007237	73.005290577731	3.50911185718215	108.861353866266	35.7665005002402	4.24166159451241	7.68825746884271	3.40312219222489	23.3198168338005	3.75438390499164	1.58414416119556	10.500691668364	0	34.4167595662151	69.932940292525	5.60023449104965	24.6344646775002	39.767844439916	15.8999640656911	6.76769252453891	24.8913395633366	26.4873215972831	23.5170599143682	18.281289698591	25.4182310275699	51.2858492246385	4.3058941810267	249.485280390669	59.480194473985	8.89075348911911	23.668378227329	2.71850285497604	64.6260735952222	173.076904514731
ENSG00000007255	91.2566132221637	21.8175215468281	6.59765781007675	75.6440930120022	25.4499695670745	46.1295448130562	86.2124288696973	43.4883070684387	49.2762887530153	19.0097299343467	48.1281701466685	2.50378598618012	80.5352173849434	29.8671932499326	51.3354828346218	0	79.5356888798321	58.0133824018459	50.9832836848598	118.280651158111	40.8661533215225	61.7322822752164	56.6719980656322	62.1334536229488	25.6429246123192	69.7554857326325	12.0073129599787	55.9813595049271	21.4424054737579	31.2422592600743	96.5068513516493	34.4672392507851	5.09049719160975
ENSG00000007264	0	0	13.1953156201535	0	0	0	0	0.630265319832445	13.1403436674707	0	5.25034583418202	0	0	0	0	0	0	0	0	0	0	0	0	1.41212394597611	6.41073115307981	0	2.66829176888416	0	0	0	0	0	0
ENSG00000007306	0	15.7147183169461	29.6894601453454	0	0	2.19664499109792	7.37343141648727	3.78159191899467	0	0	2.62517291709101	0.834595328726706	51.6251393493227	0	3.73348966069977	41.0574411291669	56.3377796232144	0	3.60943601308742	0	0	0.734908122324005	0	0	12.8214623061596	0	9.33902119109456	8.1639482611352	0	1.89347025818632	5.43700570995207	0	5.09049719160975
ENSG00000007341	0	1.98341104971165	0	0.411109201152186	12.7249847835372	3.29496748664687	6.23905735241231	3.78159191899467	14.5482376318426	0.528048053731854	1.75011527806067	0.834595328726706	0	0.728468128047135	14.0005862276241	0	0	7.73511765357946	8.57241053108262	0	3.78390308532616	0.734908122324005	0.914064484929551	16.9454873517133	3.20536557653991	1.72235767241068	9.33902119109456	0	3.13791299615969	13.2542918073043	1.35925142748802	2.87226993756543	5.09049719160975
ENSG00000007372	61.5982139249605	24.8689231617691	0	2.05554600576093	37.3266220317092	70.2926397151333	66.9280697804229	22.0592861941356	39.4210310024122	21.1219221492741	3.50023055612135	50.9103150523291	30.2867484182693	83.7738347254206	26.1344276248984	0	0	33.0891144069788	28.8754881046993	0	4.54068370239139	0	10.9687738191546	7.06061972988054	6.41073115307981	43.058941810267	25.3487718043995	0	6.27582599231937	30.2955241309812	78.8365827943051	56.0092637825259	0
ENSG00000007376	2.28141533055409	6.40794339137609	26.390631240307	8.22218402304372	5.08999391341489	21.9664499109792	15.8812368970495	1.26053063966489	7.97806579810723	0	22.7514986147888	42.564361765062	19.2733853570805	0.728468128047135	2.80011724552482	0	0	9.02430392917603	9.47476953435447	0	32.541566533805	23.5170599143682	31.9922569725343	14.1212394597611	6.41073115307981	0.861178836205339	13.3414588444208	33.8220713675601	19.3504634763181	19.8814377109564	1.35925142748802	17.2336196253926	5.09049719160975
ENSG00000007384	73.005290577731	46.076164385609	98.9648671511513	29.5998624829574	66.1699208743936	39.5396098397625	41.4046533387362	39.706715149444	34.2587531330487	24.8182585253971	7.00046111224269	4.17297664363353	51.6251393493227	55.3635777315823	30.8012897007731	0	43.0818314765757	43.8323333702836	40.1549756455975	63.2576900181035	23.4601991290222	7.34908122324005	138.937801709292	26.8303549735461	25.6429246123192	24.9741862499548	30.6853553421678	54.8150811819078	104.59709987199	68.1649292947076	6.79625713744009	1.43613496878271	0
ENSG00000007392	116.352181858259	76.2850403735249	6.59765781007675	57.555288161306	75.5015763823209	61.5060597507416	54.4499550755983	54.2028175055903	56.3157585748746	54.9169975881128	44.6279395905472	65.9330309694098	58.5084912625657	107.084814822929	57.8690897408464	0	6.62797407331934	61.0214837115713	61.811591724122	23.5812690600031	26.4873215972831	68.3464553761325	53.9298046108435	39.539470487331	57.6965803777183	35.3083322844189	46.6951059554728	31.4895147215215	34.5170429577566	65.3247239074282	72.040325656865	47.3924539698296	10.1809943832195
ENSG00000007402	0	0	0	0	2.54499695670745	0	2.83593516018741	0	2.81578792874373	0	0	5.00757197236024	0	0	0	0	0	21.0567091680774	19.8518980719808	19.2767516919073	1.51356123413046	0.734908122324005	7.31251587943641	2.82424789195222	0	1.72235767241068	2.66829176888416	0	0	4.73367564546581	0	0	0
ENSG00000007516	2.28141533055409	0.3051401614941	39.5859468604605	100.310645081133	3.39332927560993	8.78657996439166	15.8812368970495	31.5132659916223	2.34648994061977	35.907267653766	0	107.662797405745	0	0.728468128047135	24.2676827945485	114.960835161667	6.62797407331934	5.1567451023863	20.7542570752527	96.0094526014411	7.56780617065232	0.734908122324005	10.0547093342251	5.64849578390443	3.20536557653991	15.5012190516961	16.009750613305	22.159288137367	0	47.3367564546581	35.3405371146885	35.9033742195679	0
ENSG00000007520	79.8495365693933	177.744144070313	191.332076492226	64.5441445808932	57.6865976853688	68.0959947240354	70.3311919726478	122.901737367327	97.6139815297826	20.5938740955423	45.5029972295775	4.17297664363353	78.4702118109705	46.6219601950167	97.0707311781939	0	89.4776499898111	88.9538530161637	22.1077955801604	48.8469144814349	134.706949837611	43.3595792171163	86.8361260683073	81.9031888666143	105.777064025817	46.5036571550883	86.7194824887352	81.639482611352	41.8388399487958	96.5669831675025	8.15550856492811	84.7319631581802	15.2714915748292
ENSG00000007541	0	53.2469581807204	0	25.0776612702833	3.39332927560993	5.49161247774479	12.4781147048246	20.1684902346382	0.469297988123955	4.22438442985483	21.8764409757584	0	7.57168710456733	0	7.46697932139953	0	0	27.9323693045925	5.41415401963113	22.2711985566696	21.9466378948917	16.1679786911281	39.3047728519707	16.9454873517133	12.8214623061596	10.3341460344641	13.3414588444208	23.3255664603863	27.7182314660772	25.5618484855154	0	1.43613496878271	0
ENSG00000007545	22.8141533055409	9.76448516781119	26.390631240307	41.5220293163708	14.4216494213422	9.88490245994062	35.1655959863239	28.9922047122925	41.298222954908	52.2767573194535	8.75057639030337	25.0378598618012	24.7800668876749	25.4963844816497	12.1338413972742	8.21148822583339	39.767844439916	28.7918268216569	58.2021557110346	105.928557840966	53.7314238116315	0.734908122324005	44.789159761548	16.9454873517133	8.01341394134976	35.3083322844189	17.343896497747	16.3278965222704	52.8215354353547	22.7216430982359	2.71850285497604	15.7974846566099	0
ENSG00000007866	120.915012519367	28.6831751804454	6.59765781007675	50.5664317417189	70.411582468906	49.4245122997031	24.3890423776117	20.1684902346382	29.5657732518092	1.05609610746371	42.8778243124865	69.2714122843166	66.7685135584573	61.1913227559594	29.8679172855981	73.9033940325005	69.5937277698531	52.4269085409274	58.2021557110346	121.836556810016	15.1356123413046	107.296585859305	21.9375476383092	31.0667268114744	38.4643869184789	26.6965439223655	17.343896497747	32.6557930445408	58.0513904289542	29.348789001888	36.6997885421765	48.8285889386123	249.434362388878
ENSG00000007923	2.28141533055409	6.56051347212314	0	26.7220980748921	12.7249847835372	3.29496748664687	15.314049865012	9.45397979748668	12.6710456793468	38.5475079224253	7.87551875127303	35.0530038065217	17.2083797831076	8.01314940851849	16.8007034731489	0	49.709805549895	15.8999640656911	41.5085141505053	11.9777874590492	47.6771788751096	16.9028868134521	22.8516121232388	9.88486762183276	17.6295106709695	12.9176825430801	2.66829176888416	27.9906797524635	21.4424054737579	28.4020538727948	149.517657023682	8.61680981269629	5.09049719160975
ENSG00000007933	20.5327379749868	92.1523287712181	3.29882890503838	115.932794724916	26.298301885977	5.49161247774479	255.801351448905	123.532002687159	85.4122338385598	215.443605922596	48.1281701466685	41.7297664363353	33.0400891835665	62.6482590120536	81.2034001202199	0	9.94196110997901	77.7809052943267	111.89251640571	172.180694723832	94.597577133154	17.6377949357761	78.6095457039414	97.4365522723515	28.8482901888591	30.1412592671869	45.3609600710307	71.1429777041782	115.579795358548	136.329858589415	119.614125618946	10.052944781479	0
ENSG00000007944	219.015871733193	77.2004608580072	95.6660382461129	56.7330697590017	91.6198904414681	126.30708698813	48.7780847552235	72.4805117807312	61.4780364442381	146.797358937455	38.5025361173348	225.340738756211	71.5868598977274	138.408944328956	54.1356000801466	164.229764516668	238.607066639496	65.7485000554254	38.3502576390538	122.585168526206	90.8136740478279	74.9606284770485	78.6095457039414	53.6607099470921	139.433402579486	73.2002010774538	278.836489848395	122.459223917028	138.068171831026	95.6202480384093	182.139691283394	203.931165567145	539.592702310633
ENSG00000007952	0	2.7462614534469	0	0	0	0	10.7765536087122	6.30265319832445	0	26.9304507403245	0	50.9103150523291	0	0	1.86674483034988	0	0	0.859457517064384	0.902359003271854	0	0	0	0	1.41212394597611	9.61609672961972	0	0	1.16627832301931	0	0	0	0	0
ENSG00000007968	4.56283066110819	14.6467277517168	0	4.93331041382623	0.848332318902482	2.19664499109792	11.3437406407496	5.04212255865956	22.0570054418259	0.528048053731854	32.3771326441225	0	19.9617205484048	15.2978306889898	0.933372415174941	0	0	0.859457517064384	0	0.374305858095287	25.7305409802179	63.2020985198644	1.8281289698591	7.06061972988054	6.41073115307981	0.861178836205339	1.33414588444208	0	19.3504634763181	0.946735129093162	0	0	0
ENSG00000008018	221.297287063747	211.00442167317	122.05666948642	228.576715840615	255.348027989647	202.091339181008	258.637286609092	308.199741398066	241.688463883837	258.743546328608	483.906874383776	191.122330278416	262.944043085883	364.234064023568	259.477531418634	443.420364195003	142.501442576366	360.542428408509	241.832212876857	299.257533547182	386.714895320334	196.955376782833	272.391216509006	282.424789195222	447.148497927317	282.466658275351	337.538908763846	306.73119895408	278.228285659492	270.766246920644	534.185811002791	351.853067351765	290.158339921756
ENSG00000008083	271.488424335937	256.317735655044	603.685689622023	242.143319478637	349.512915387823	341.578296115726	158.245181938458	167.65057507543	320.530525888661	206.466789009155	218.764409757584	220.33316678385	289.100780356207	162.448392554511	163.340172655615	722.610963873338	195.52523516292	219.161666851418	189.495390687089	173.865071085261	342.82161953055	459.317576452503	287.016248267879	257.006558167652	232.389004299143	198.071132327228	644.392462185525	309.063755600118	401.65286350844	236.68378227329	434.960456796166	666.36662551518	529.411707927414
ENSG00000008086	15.9699073138787	45.3133139818738	85.7695515309978	18.0888048506962	16.9666463780496	23.0647724065281	15.314049865012	36.5553885502818	13.1403436674707	90.8242652418788	17.5011527806067	2.50378598618012	12.3900334438374	1.45693625609427	20.5341931338487	16.4229764516668	0	12.0324052389014	15.3401030556215	25.8271042085748	13.6220511071742	58.0577416635964	28.3359990328161	9.88486762183276	51.2858492246385	13.7788613792854	122.741421368671	39.6534629826567	17.7815069782382	31.2422592600743	24.4665256947843	21.5420245317407	20.361988766439
ENSG00000008128	0	0.3051401614941	0	18.4999140518484	0	0	0	0	2.34648994061977	0	0	21.6994785468944	0	9.47008566461276	0	0	0	0.429728758532192	0	16.4694577561926	0.756780617065232	40.4199467278203	21.9375476383092	4.23637183792833	9.61609672961972	0.861178836205339	30.6853553421678	0	0	0	31.2627828322244	5.74453987513086	0
ENSG00000008130	146.010581155462	51.7212573732499	29.6894601453454	25.8998796725877	23.7533049292695	38.4412873442135	7.37343141648727	64.2870626229094	1.40789396437186	17.953633826883	7.87551875127303	16.6919065745341	11.0133630611888	30.5956613779797	56.0023449104965	238.133158549168	13.2559481466387	14.1810490315623	26.6195905965197	0	53.7314238116315	97.7427802690927	20.1094186684501	56.4849578390443	41.6697524950188	30.1412592671869	120.073129599787	106.131327394758	49.1606369398351	37.8694051637265	172.624931290978	287.226993756543	381.787289370731
ENSG00000008196	0	0	0	0	1.69666463780496	1.09832249554896	0	0	0	0	0	0	0	0	0	0	56.3377796232144	0	0.451179501635927	0	0	0	0	0	0	23.2518285775442	0	0	4.18388399487958	10.4140864200248	0	0	50.9049719160975
ENSG00000008197	0	0	0	0	5.93832623231738	0	0	0	0	0	0	0	0	0	0	0	0	0	0	0	0	0	0	0	0	0	0	8.1639482611352	0	0	0	0	0
ENSG00000008226	11.4070766527705	0.15257008074705	0	48.5108857359579	2.54499695670745	0	18.1499850251994	10.0842451173191	0	10.0329130209052	0	0	0	45.1650239389224	14.0005862276241	8.21148822583339	3.31398703665967	9.45403268770822	10.8283080392623	16.0951518980973	26.4873215972831	0	0.914064484929551	2.82424789195222	6.41073115307981	11.1953248706694	1.33414588444208	8.1639482611352	0.522985499359948	0	2.71850285497604	0	55.9954691077072
ENSG00000008256	43.3468912805278	41.0413517209564	9.89648671511513	22.199896862218	11.0283201457323	38.4412873442135	26.6577905057617	3.15132659916223	27.6885812993133	8.44876885970966	25.3766715318798	3.33838131490682	46.1184578187283	0	16.8007034731489	16.4229764516668	39.767844439916	39.9647745434939	58.6533352126705	33.3132213704805	34.0551277679355	17.6377949357761	12.7969027890137	32.4788507574505	9.61609672961972	24.1130074137495	44.0268141865887	17.4941748452897	17.2585214788783	17.0412323236769	1.35925142748802	14.3613496878271	5.09049719160975
ENSG00000008282	82.1309518999474	130.905129280969	29.6894601453454	74.4107654085456	123.00818624086	112.028894545994	128.751456272508	173.953228273755	121.548178924104	204.882644847959	127.758415298429	30.8800271628881	156.940423621941	178.474691371548	184.807738204638	24.6344646775002	9.94196110997901	111.299748459838	60.0068737175783	176.672365020975	141.517975391198	41.8897629724683	97.8048998874619	93.2001804344231	121.803891908516	154.151011680756	76.0463154131986	141.119677085337	157.941620806704	120.235361394832	12.2332628473922	74.6790183767012	106.900441023805
ENSG00000008283	301.14682363314	303.767030767376	451.939559990258	618.308238532888	251.954698714037	208.681274154302	512.169889929846	570.390114448363	391.863820083502	485.804209433305	320.271095885103	337.176512805589	264.320713468532	381.717299096699	362.148497087877	106.749346935834	195.52523516292	279.753421804457	369.516011839824	419.409713995769	340.551277679355	115.380575204869	300.727215541822	353.030986494027	225.978273146063	321.219705904592	116.070691946461	300.899807338983	230.636605217737	394.788548831848	180.780439855906	66.0622085640049	122.171932598634
ENSG00000008294	237.267194377626	171.793910921178	798.316595019287	379.86490186462	272.314674367697	269.089011409495	108.899910151197	187.819065310069	187.719195249582	114.05837960608	309.770404216739	438.997142910247	143.173719795455	211.984225261716	142.805979521766	763.668405002505	268.432949969433	130.637542593786	120.916106438428	60.6375490114365	233.088430056092	715.065603021257	95.0627064326733	299.370276546935	402.273379855758	136.927434956649	1166.04350300238	580.806604863618	164.217446799024	251.831544338781	259.617022650212	973.69950883468	279.977345538536
ENSG00000008311	0	0	59.3789202906908	18.9110232530006	8.48332318902482	8.78657996439166	17.582797993162	3.15132659916223	9.85525775060305	0	9.6256340293337	24.2032645330745	4.13001114794581	0.728468128047135	0.933372415174941	0	0	8.16484641211165	5.86533352126705	0	9.83814802184802	0	0.914064484929551	14.1212394597611	0	7.75060952584805	14.6756047288629	0	0	3.78694051637265	0	1.43613496878271	10.1809943832195
ENSG00000008323	2.28141533055409	6.10280322988199	62.6777491957291	4.93331041382623	11.8766524646348	24.1630949020771	16.448423929087	20.1684902346382	3.28508591686768	51.7487092657217	9.6256340293337	0.834595328726706	5.50668153059442	16.7547669450841	13.0672138124492	0	0	12.4621339974336	36.996719134146	0.187152929047643	0.756780617065232	6.61417310091605	25.5938055780274	22.5939831356177	9.61609672961972	27.5577227585709	6.6707294222104	4.66511329207726	3.13791299615969	4.73367564546581	0	4.30840490634814	0
ENSG00000008324	0	32.4974271991216	6.59765781007675	29.1887532818052	30.5399634804894	51.621157290801	45.3749625629986	36.5553885502818	7.97806579810723	1.05609610746371	18.3762104196371	0	29.598413226945	32.052597634074	61.6025794015461	0	3.31398703665967	15.4702353071589	41.5085141505053	21.8968926985743	17.4059541925003	22.0472436697201	68.5548363697163	55.0728338930682	30.4509729771291	40.475405301651	37.3560847643783	23.3255664603863	39.746897951356	49.2302267128444	0	2.87226993756543	127.262429790244
ENSG00000008382	4.56283066110819	6.25537331062904	13.1953156201535	6.98885641958716	8.48332318902482	14.2781924421365	13.0453017368621	8.82371447765423	1.40789396437186	15.8414416119556	2.62517291709101	50.0757197236024	9.63669267854023	5.82774502437708	8.40035173657447	82.1148822583339	0	12.0324052389014	10.3771285376263	7.86042302000102	8.32458678771756	41.8897629724683	0	12.709115513785	6.41073115307981	8.61178836205339	8.00487530665248	23.3255664603863	9.93672448783901	2.84020538727948	0	2.87226993756543	0
ENSG00000008394	50.1911372721901	237.704185803904	42.8847757654989	76.0552022131544	115.373195370738	77.980897183976	202.485770437381	127.313594606154	145.482376318426	236.037480018139	75.254956956609	171.092042388975	158.31709400459	117.283368615589	188.541227865338	65.6919058066671	331.398703665967	205.410346578388	257.623495434114	477.614274929586	168.005296988482	35.2755898715522	313.524118330836	155.333634057372	94.5582845079272	283.327837111557	32.0195012266099	80.4732042883327	134.930258834867	99.407188554782	433.601205368678	44.5201840322641	137.443424173463
ENSG00000008405	38.7840606194196	5.18738274539969	3.29882890503838	12.7443852357178	33.0849604371968	30.7530298753708	28.9265386339116	41.5975111089414	6.57017183373537	8.44876885970966	9.6256340293337	0	6.19501672191872	1.45693625609427	28.9345448704232	0	0	18.0486078583521	21.2054365768886	77.2941596966767	0	47.7690279510603	1.8281289698591	12.709115513785	9.61609672961972	3.44471534482136	18.6780423821891	27.9906797524635	17.7815069782382	32.1889943891675	1.35925142748802	24.4142944693061	15.2714915748292
ENSG00000008438	0	0	0	0	0	0	0	0	0	0	0	0	0	0	0	123.172323387501	0	0	0	0	0	11.0236218348601	0	1.41212394597611	4.80804836480986	0	21.3463341510733	17.4941748452897	0	4.73367564546581	0	10.052944781479	0
ENSG00000008441	61.5982139249605	99.1705524855824	46.1836046705373	93.3217886615462	79.7432379768333	39.5396098397625	114.004593439534	47.2698989874334	76.9648700523286	60.7255261791632	75.254956956609	171.092042388975	97.0552619767266	38.6088107864982	175.474014052889	8.21148822583339	165.699351832983	105.713274598919	74.8957972715639	36.8691270223858	45.4068370239139	49.2388441957083	74.9532877642232	49.4243381091638	81.7368222017676	106.786175689462	8.00487530665248	13.9953398762318	81.0627524007919	93.726777780223	6.79625713744009	34.4672392507851	25.4524859580487
ENSG00000008513	95.8194438832719	147.535268082397	155.044958536804	98.6662082765246	100.103213630493	71.3909622106823	76.0030622930226	73.7410424203961	68.5175062660974	15.3133935582238	139.134164605824	94.3092721461178	147.992066134725	84.5023028534677	59.7358345711962	82.1148822583339	96.1056240631304	73.4836177090048	128.134978464603	29.1958569314324	142.274756008264	182.992122458677	127.969027890137	90.3759325424709	83.3395049900375	106.786175689462	361.553534683804	148.117347023453	89.4305203905511	86.1528967474777	165.828674153538	235.526134880365	473.416238819706
ENSG00000008516	123.196427849921	8.84906468332889	425.548928749951	268.86541755353	110.283201457323	161.453406845697	16.448423929087	0	56.7850565629985	6.33657664478224	106.757031961701	272.078077164906	19.2733853570805	0.728468128047135	8.40035173657447	1092.12793403584	182.269287016282	33.0891144069788	18.0471800654371	1.12291757428586	125.625582432829	444.619414006023	15.5390962438024	251.358062383747	144.241450944296	24.9741862499548	1769.0774427702	487.504339022073	7.84478249039922	119.288626265738	606.226136659656	2333.71932427191	2280.54274184117
ENSG00000008517	43.3468912805278	0.3051401614941	0	3.69998281036967	0	20.8681274154302	0	0	0.469297988123955	0	9.6256340293337	0	6.88335191324302	0	17.7340758883239	41.0574411291669	19.883922219958	17.6188790998199	0.451179501635927	0	3.02712246826093	11.7585299571841	52.1016756409844	0	8.01341394134976	0	6.6707294222104	9.33022658415451	1.0459709987199	31.2422592600743	2.71850285497604	0	0
ENSG00000008710	6.84424599166228	14.6467277517168	3.29882890503838	10.2777300288046	19.5116433347571	13.1798699465875	19.8515461213119	13.2355717164813	2.34648994061977	43.8279884597438	11.3757493073944	12.5189299309006	8.26002229589163	32.052597634074	18.6674483034988	0	0	13.7513202730301	10.8283080392623	8.98334059428688	17.4059541925003	22.7821517920442	38.3907083670411	5.64849578390443	9.61609672961972	18.0847555603121	8.00487530665248	9.33022658415451	2.61492749679974	9.46735129093162	4.07775428246406	7.18067484391357	5.09049719160975
ENSG00000008735	0	0	0	3.69998281036967	0	3.29496748664687	0	0	7.03946982185932	0	8.75057639030337	0.834595328726706	0	0	3.73348966069977	0	0	4.72701634385411	0.451179501635927	0	0	0	15.5390962438024	0	0	0	0	0	0	16.0944971945837	0	1.43613496878271	0
ENSG00000008838	82.1309518999474	203.681057797311	115.459011676343	225.287842231398	129.79484479208	136.191989448071	174.126418835507	148.112350160625	210.245498679532	199.074116256909	86.6307062640033	269.574291178726	110.133630611888	123.111113639966	126.938648463792	8.21148822583339	301.57282033603	122.042967423143	108.283080392623	156.45984868383	112.76031194272	15.4330705688041	122.48464098056	131.327526975778	128.214623061596	94.7296719825873	44.0268141865887	55.9813595049271	90.9994768886309	142.957004493067	138.643645603778	27.2865644068716	86.5384522573657
ENSG00000008853	0	36.1591091370508	0	16.4443680460874	27.9949665237819	16.4748374332344	8.50780548056223	27.1014087527951	31.442965204305	50.6926131582579	15.7510375025461	54.2486963672359	9.63669267854023	4.37080876828281	31.734662115948	8.21148822583339	0	47.6998921970733	34.2896421243305	19.0895987628596	19.676296043696	0	21.9375476383092	9.88486762183276	20.8348762475094	10.3341460344641	17.343896497747	33.8220713675601	22.4883764724778	36.9226700346333	1.35925142748802	25.8504294380889	5.09049719160975
ENSG00000008869	61.5982139249605	39.6682209942329	26.390631240307	35.7665005002402	22.904972610367	51.621157290801	49.345271787261	32.1435313114547	31.9122631924289	105.609610746371	35.0023055612135	21.6994785468944	39.9234410968095	25.4963844816497	43.8685035132222	0	0	33.518843165511	37.447898635782	0	38.5958114703269	9.55380559021206	95.0627064326733	12.709115513785	33.656338553669	20.6682920689281	6.6707294222104	19.8267314913283	32.9480864596767	17.9879674527701	1.35925142748802	10.052944781479	15.2714915748292
ENSG00000008952	241.830025038734	304.07217092887	372.767666269337	342.865073760923	397.867857565264	298.743718789317	386.254368817525	355.469640385499	352.44278908109	343.231234925705	299.269712548375	560.01346557562	366.882656975853	587.873779334038	380.815945391376	221.710182097501	238.607066639496	271.588575392345	342.896421243305	363.263835281476	321.631762252724	292.493432684954	246.797410930979	405.279572495143	427.916304468077	402.170516507893	392.238890025972	390.70323821147	314.837270614689	355.025673409936	161.750919871074	382.011901696202	346.153809029463
ENSG00000008988	828.153764991136	1387.31974423292	940.166237935937	817.285091890546	1088.41036515188	1166.41849027299	1694.18766469596	1581.3356874596	1856.54284101837	960.519409738242	2696.05258585247	645.142189105744	2140.03410982726	1137.13874788158	1861.14459585883	558.38119935667	1077.04578691439	1615.35040332251	1159.98249870597	1243.06975473445	991.382608355454	908.34643919247	1159.9478313756	1395.1784586244	1758.14301873214	2335.51700378888	860.524095465142	1436.85489395979	1170.96453306692	1241.16975424113	1756.15284431452	1039.76171739869	783.936567507901
ENSG00000009307	1508.01553349626	1287.53891142435	1194.17606362389	941.851179839658	1157.97361530189	1166.41849027299	1306.23173478232	1382.17184639255	1179.3458441555	1065.07292437715	1210.20471477896	1347.0368605649	1242.44502034037	1103.62921399141	1364.59047098576	722.610963873338	1517.80606279013	1222.57831802409	1106.29213801129	1162.03253645682	959.597822438715	816.48292390197	925.947323233635	1135.34765256479	1160.34233870745	1282.29528710975	1084.66060405141	1070.64350053173	1292.29716891843	1138.92236029907	880.794925012236	995.241533366421	1598.41611816546
ENSG00000009335	157.417657808232	84.2186845723715	82.4707226259594	48.9219949371101	79.7432379768333	130.700376970326	113.437406407496	106.514839051683	122.956072888476	61.7816222866269	124.258184742308	100.986034775931	106.003619463943	85.959239109562	106.404455329943	262.767623226668	96.1056240631304	116.886222320756	165.131697598749	46.4139264038156	92.3272352819584	141.837267608533	174.586316621544	93.2001804344231	80.1341394134976	134.343898448033	61.3707106843357	99.1336574566417	84.2006653969516	92.7800426511298	69.3218228018889	51.7008588761777	71.2669606825364
ENSG00000009413	63.8796292555146	30.666586230157	62.6777491957291	102.366191086894	59.3832623231738	43.9328998219583	61.8233864920856	86.9766141368774	30.973667216181	68.1181989314091	56.8787465369719	77.6173655715837	50.9368041579984	72.8468128047135	21.4675655490237	73.9033940325005	298.25883329937	66.6079575724898	33.8384626226945	0.56145878714293	48.4339594921749	47.0341198287363	3.6562579397182	62.1334536229488	48.0804836480986	69.7554857326325	76.0463154131986	75.8080909962554	27.1952459667173	54.9106374874034	110.099365626529	130.688282159227	66.1764634909267
ENSG00000009709	68.4424599166228	61.333172460314	6.59765781007675	60.0219433682191	42.4166159451241	31.8513523709198	144.632693169558	32.1435313114547	129.526244722212	120.923004304594	7.00046111224269	76.782770242857	27.5334076529721	107.813282950976	76.5365380443452	41.0574411291669	13.2559481466387	121.183509906078	43.7644116586849	37.243432880481	76.4348423235885	13.2283462018321	83.1798681285891	79.0789409746621	19.2321934592394	99.035566163614	18.6780423821891	73.4755343502168	41.3158544494359	85.2061616183845	2.71850285497604	34.4672392507851	5.09049719160975
ENSG00000009765	0	0.15257008074705	0	0	17.8149786969521	3.29496748664687	26.6577905057617	0.630265319832445	3.75438390499164	0	9.6256340293337	0	19.2733853570805	0	2.80011724552482	0	0	3.43783006825754	4.9629745179952	0.748611716190574	7.56780617065232	0.734908122324005	2.74219345478865	9.88486762183276	8.01341394134976	6.88943068964271	5.33658353776832	0	6.79881149167932	10.4140864200248	0	0	0
ENSG00000009780	84.4123672305015	17.5455592859107	0	43.1664661209795	12.7249847835372	32.9496748664687	20.4187331533494	45.379103027936	25.8113893468175	0.528048053731854	7.00046111224269	15.0227159170807	27.5334076529721	0.728468128047135	47.601993173922	8.21148822583339	76.2217018431724	26.2134542704637	7.67005152781076	50.1569849847684	48.4339594921749	9.55380559021206	12.7969027890137	9.88486762183276	35.259021341939	28.4189015947762	13.3414588444208	2.33255664603863	28.2412169654372	39.7628754219128	1.35925142748802	5.74453987513086	0
ENSG00000009790	2.28141533055409	1.98341104971165	108.861353866266	48.0997765348057	14.4216494213422	5.49161247774479	14.7468628329745	0	10.793853726851	16.3694896656875	10.500691668364	0.834595328726706	10.3250278698645	0	5.60023449104965	82.1148822583339	0	8.16484641211165	11.7306670425341	0	11.3517092559785	42.6246710947923	13.7109672739433	11.2969915678089	28.8482901888591	21.5294709051335	118.738983715345	36.1546280135987	11.5056809859189	9.46735129093162	36.6997885421765	180.953006066622	269.796351155317
ENSG00000009830	2.28141533055409	25.7843436462514	23.0918023352686	169.788100075853	18.6633110158546	37.3429648486646	59.5546383639356	98.9516552136939	52.561374669883	167.919281086729	18.3762104196371	55.9178870246893	16.5200445917833	29.8671932499326	80.270027705045	0	3.31398703665967	58.4431111603781	98.3571313566321	103.869875621442	97.624699601415	0.734908122324005	16.4531607287319	73.4304451907576	17.6295106709695	42.1977629740616	17.343896497747	11.6627832301931	19.873448975678	64.377988778335	86.9920913592332	25.8504294380889	66.1764634909267
ENSG00000009844	25.095568636095	36.3116792177979	49.4824335755756	46.0442305290448	69.5632501500036	40.6379323353114	63.524947588198	97.691124574029	64.7631223611058	53.8609014806491	69.1295534833966	64.2638403119564	66.080178367133	28.4102569938383	89.6037518567944	90.3263704841673	182.269287016282	57.5836536433137	90.2359003271854	166.566106852403	84.759429111306	44.8293954617643	110.601802676476	74.8425691367337	67.312677107338	55.1154455171417	60.0365647998936	76.9743693192747	87.8615638924712	57.7508428746829	5.43700570995207	58.8815337200913	15.2714915748292
ENSG00000009950	4.56283066110819	0	0	0	0	1.09832249554896	0	0.630265319832445	0	0	0	0	0	13.1124263048484	0	32.8459529033335	0	0.429728758532192	0	0	2.2703418511957	0	0	0	4.80804836480986	1.72235767241068	1.33414588444208	1.16627832301931	4.18388399487958	0	0	0	0
ENSG00000009954	79.8495365693933	109.392747895635	65.9765781007675	107.299501500721	111.979866095128	70.2926397151333	120.243650791946	124.162268006992	116.385901054741	51.2206612119898	133.883818771642	153.565540485714	76.4052062369976	202.514139597104	135.339000200366	82.1148822583339	92.7916370264708	81.2187353625843	104.673644379535	59.5146314371506	92.3272352819584	46.2992117064123	117.000254070983	93.2001804344231	96.1609672961972	80.9508106033019	140.085317866418	127.124337209105	108.780983866869	83.3126913601982	17.6702685573442	15.7974846566099	20.361988766439
ENSG00000010017	20.5327379749868	43.6350430936562	29.6894601453454	60.4330525693713	60.2315946420762	93.3574121216614	62.3905735241231	88.2371447765423	46.4605008242715	30.6267871164475	54.2535736198809	1.66919065745341	115.640312142483	123.839581768013	50.4021104194468	0	9.94196110997901	37.3864019923007	16.6936415605293	58.5788667919124	30.2712246826093	115.380575204869	60.3282560053504	33.8909747034266	46.4778008598286	48.226014827499	116.070691946461	43.1522979517146	38.1779414532762	59.6443131328692	4.07775428246406	24.4142944693061	25.4524859580487
ENSG00000010030	0	0	0	0	0	0	0	0	0	54.3889495343809	11.3757493073944	0	0	0	0	0	0	9.02430392917603	0	0	1.51356123413046	0	27.4219345478865	0	1.60268278826995	0	6.6707294222104	6.99766993811588	0	11.3608215491179	0	0	0
ENSG00000010072	2.28141533055409	12.5107466212581	0	18.4999140518484	28.8432988426844	2.19664499109792	25.5234164416867	28.36193939246	27.6885812993133	0	11.3757493073944	51.7449103810558	29.598413226945	21.8540438414141	9.33372415174941	57.4804175808337	3.31398703665967	25.3539967533993	27.9731291014275	33.5003742995282	45.4068370239139	5.87926497859204	1.8281289698591	18.3576112976894	19.2321934592394	0.861178836205339	38.6902306488203	5.83139161509657	20.396434475038	30.2955241309812	2.71850285497604	50.264723907395	30.5429831496585
ENSG00000010165	0	29.2934555034336	23.0918023352686	11.5110576322612	11.0283201457323	23.0647724065281	32.896847858174	56.7238787849201	15.9561315962145	9.50486496717336	49.0032277856988	2.50378598618012	33.0400891835665	44.4365558108753	42.0017586828724	49.2689293550003	0	33.9485719240432	34.2896421243305	0.374305858095287	9.83814802184802	8.81889746788806	1.8281289698591	32.4788507574505	27.2456074005892	38.7530476292403	1.33414588444208	1.16627832301931	31.9021154609568	18.9347025818632	1.35925142748802	27.2865644068716	15.2714915748292
ENSG00000010219	25.095568636095	30.51401614941	0	0	2.54499695670745	8.78657996439166	15.314049865012	6.30265319832445	9.85525775060305	14.7853455044919	8.75057639030337	0.834595328726706	20.6500557397291	24.0394482255555	14.9339586427991	0	0	19.3377941339486	18.498359567073	0	36.3254696191312	10.2887137125361	19.1953541835206	21.1818591896416	14.4241450944296	18.9459343965175	0	0	0.522985499359948	9.46735129093162	0	1.43613496878271	0
ENSG00000010244	264.644178344275	210.241571269435	316.687574883684	244.609974685551	262.134686540867	269.089011409495	233.113870167405	284.249659244433	269.846343171274	289.370333445056	325.521441719285	86.7979141875774	265.697383851181	254.963844816497	174.540641637714	90.3263704841673	268.432949969433	189.080653754164	241.832212876857	237.309914032412	141.517975391198	221.94225294185	296.156893117174	244.297442653867	242.005101028763	286.772552456378	320.195012266099	248.417282803114	224.360779225418	252.778279467874	311.268576894756	226.909325067669	81.4479550657559
ENSG00000010256	45.6283066110819	67.283405609449	26.390631240307	44.3997937244361	62.7765915987837	52.71947978635	65.7936957163479	6.30265319832445	38.0131370380403	179.008290215098	101.506686127519	131.031466610093	41.9884466707824	71.3898765486193	59.7358345711962	0	43.0818314765757	69.1863301236829	53.2391811930394	25.0784924923842	134.706949837611	45.5643035840883	117.000254070983	87.5516846505187	28.8482901888591	61.1436973705791	26.6829176888416	40.819741305676	99.3672448783901	34.0824646473538	25.8257771222724	68.9344785015703	20.361988766439
ENSG00000010270	38.7840606194196	30.666586230157	0	18.4999140518484	16.1183140591472	23.0647724065281	39.7030922426238	22.689551513968	35.1973491092966	15.3133935582238	21.0013833367281	31.7146224916148	43.365117053431	0	31.734662115948	0	152.443403686345	11.6026764803692	41.9596936521412	72.6153364704856	41.6229339385878	11.0236218348601	30.1641280026752	35.3030986494027	59.2992631659883	35.3083322844189	9.33902119109456	32.6557930445408	33.4710719590367	22.7216430982359	57.0885599544968	28.7226993756543	0
ENSG00000010278	880.62631759388	746.525405095315	112.160182771305	365.476079824293	1491.36821663056	676.566657258158	745.850947129289	850.227916453968	581.46020728558	1371.86884359536	944.187192513733	1229.35891921444	1272.04343356731	1852.49444962387	998.708484237187	1149.60835161667	1799.4949609062	1006.42475248239	1154.56834468634	809.997876918201	898.298592456431	610.708649651248	2376.56766081683	594.504181255942	477.599470904446	1756.80482585889	501.638852550222	539.986863557942	1235.2917494882	473.367564546581	1995.38109555241	429.404355666032	1028.28043270517
ENSG00000010292	4.56283066110819	5.33995282614674	3.29882890503838	10.6888392299568	8.48332318902482	25.261417397626	17.582797993162	11.9750410768165	20.649111477454	10.5609610746371	2.62517291709101	0.834595328726706	5.50668153059442	0	10.2670965669244	0	0	8.16484641211165	9.02359003271854	0.935764645238217	8.32458678771756	19.1076111804241	10.0547093342251	9.88486762183276	8.01341394134976	26.6965439223655	1.33414588444208	0	1.56895649807984	9.46735129093162	4.07775428246406	0	5.09049719160975
ENSG00000010295	2.28141533055409	16.9352789629225	13.1953156201535	0.822218402304372	2.54499695670745	4.39328998219583	9.6421795446372	1.26053063966489	8.91666177435514	0.528048053731854	14.0009222244854	0	0	0	0	0	92.7916370264708	5.5864738609185	4.51179501635927	0	1.51356123413046	50.7086604403563	1.8281289698591	14.1212394597611	11.2187795178897	21.5294709051335	28.0170635732837	17.4941748452897	0.522985499359948	12.3075566782111	0	37.3395091883506	0
ENSG00000010310	0	16.7827088821755	0	28.3665348795008	8.48332318902482	27.4580623887239	12.4781147048246	6.9329185181569	9.3859597624791	44.3560365134757	7.87551875127303	0	0	0	23.3343103793735	0	0	11.172947721837	46.4714886685005	66.0649839538181	22.703418511957	0.734908122324005	23.7656766081683	5.64849578390443	12.8214623061596	16.3623978879014	4.00243765332624	0	10.459709987199	19.8814377109564	1.35925142748802	2.87226993756543	0
ENSG00000010318	15.9699073138787	1.06799056522935	0	11.9221668334134	7.63499087012234	7.68825746884271	30.628099730024	21.4290208743031	1.40789396437186	1.05609610746371	12.2508069464247	0.834595328726706	0.688335191324302	58.2774502437708	28.0011724552482	0	0	13.3215915144979	27.5219495997916	8.6090347361916	6.81102555358709	0	0	14.1212394597611	0	4.3058941810267	22.6804800355154	6.99766993811588	11.5056809859189	17.0412323236769	1.35925142748802	2.87226993756543	5.09049719160975
ENSG00000010322	2.28141533055409	4.57710242241149	29.6894601453454	32.8887360921749	24.601637248172	32.9496748664687	31.1952867620615	18.2776942751409	42.7061169192799	29.0426429552519	15.7510375025461	45.0681477512421	13.0783686351617	0	43.8685035132222	8.21148822583339	0	18.9080653754164	23.4613340850682	24.142727847146	39.3525920873921	24.2519680366922	16.4531607287319	19.7697352436655	38.4643869184789	26.6965439223655	17.343896497747	8.1639482611352	48.1146659411152	34.0824646473538	0	15.7974846566099	20.361988766439
ENSG00000010327	0	4.57710242241149	3.29882890503838	0.822218402304372	5.08999391341489	3.29496748664687	2.83593516018741	0	3.28508591686768	0	16.6260951415764	0	0	0	5.60023449104965	41.0574411291669	0	0.429728758532192	0	0	10.5949286389133	11.7585299571841	0.914064484929551	1.41212394597611	40.0670697067488	0.861178836205339	10.6731670755366	9.33022658415451	0	10.4140864200248	0	0	0
ENSG00000010361	2.28141533055409	0	9.89648671511513	23.8443336668268	0.848332318902482	13.1798699465875	0.567187032037482	5.67238787849201	0.93859597624791	57.0291898030402	0	0	0	0	4.66686207587471	0	0	2.57837255119315	0	0	0	3.67454061162003	0	7.06061972988054	1.60268278826995	6.88943068964271	26.6829176888416	25.6581231064249	0	0	1.35925142748802	10.052944781479	0
ENSG00000010404	161.980488469341	145.551857032686	168.240274156957	212.54345699568	291.826317702454	207.582951658753	160.513930066607	227.525780459513	113.570113125997	236.56552807187	112.882435434913	234.521287372204	129.407015968969	189.401713292255	183.874365789463	328.459529033335	112.675559246429	142.240219074156	238.673956365406	167.501871497641	161.95105205196	266.771648403614	252.281797840556	166.630625625181	110.585112390627	86.9790624567393	755.126570594218	194.768479944225	105.12008537135	132.542918073043	546.419073850183	440.893435416293	223.981876430829
ENSG00000010438	6.84424599166228	0	59.3789202906908	3.69998281036967	18.6633110158546	24.1630949020771	0	17.6474289553085	10.793853726851	0	16.6260951415764	0	5.50668153059442	12.3839581768013	8.40035173657447	16.4229764516668	26.5118962932774	12.0324052389014	7.21887202617484	0	0.756780617065232	8.81889746788806	3.6562579397182	7.06061972988054	6.41073115307981	9.47296719825873	20.0121882666312	18.660453168309	10.9826954865589	28.4020538727948	0	12.9252147190444	10.1809943832195
ENSG00000010539	27.3769839666491	26.0894838077455	59.3789202906908	40.2887017129142	10.1799878268298	42.8345773264094	16.448423929087	6.30265319832445	27.2192833111894	0.528048053731854	30.6270173660618	45.0681477512421	2.06500557397291	18.2117032011784	3.73348966069977	262.767623226668	53.0237925865547	22.7756242022062	5.86533352126705	0	6.05424493652186	38.9501304831723	10.9687738191546	26.8303549735461	80.1341394134976	18.9459343965175	344.209638186057	31.4895147215215	1.0459709987199	37.8694051637265	129.128885611362	186.697545941753	310.520328688195
ENSG00000010610	0	10.8324757330405	0	2.05554600576093	0.848332318902482	1.09832249554896	10.7765536087122	1.26053063966489	7.97806579810723	0.528048053731854	5.25034583418202	32.5492178203415	0	0	0	0	3.31398703665967	8.16484641211165	25.2660520916119	0	0.756780617065232	5.87926497859204	0	4.23637183792833	8.01341394134976	0	8.00487530665248	6.99766993811588	0.522985499359948	0	0	11.4890797502617	0
ENSG00000010626	47.909721941636	1.67827088821755	85.7695515309978	310.3874468699	27.1466342048794	59.3094147596437	269.413840217804	175.21375891342	24.8727933705696	390.755559761572	6.12540347321236	161.911493772981	13.766703826486	23.3109800975083	142.805979521766	0	39.767844439916	48.9890784726699	99.7106698615399	300.380451121468	151.356123413046	7.34908122324005	44.789159761548	142.624518543587	16.0268278826995	53.393087844731	25.3487718043995	139.953398762318	9.41373898847906	298.221565664346	8.15550856492811	18.6697545941753	25.4524859580487
ENSG00000010671	2.28141533055409	0	16.4941445251919	8.22218402304372	0	0	0	0	0	0	4.37528819515168	0	0	0.728468128047135	0	65.6919058066671	0	0.429728758532192	0.451179501635927	0.187152929047643	3.02712246826093	8.08398934556405	0.914064484929551	8.47274367585665	0	0	109.399962524251	1.16627832301931	0	0	23.1072742672963	140.741226940706	66.1764634909267
ENSG00000010704	0	0.610280322988199	13.1953156201535	9.86662082765246	0	6.58993497329375	2.26874812814993	17.017163635476	0.469297988123955	12.1451052358326	10.500691668364	1.66919065745341	0.688335191324302	24.7679163536026	6.53360690622459	0	0	8.59457517064384	8.12123102944669	0	14.3788317242394	2.20472436697202	10.0547093342251	0	16.0268278826995	0.861178836205339	0	0	10.9826954865589	0	1.35925142748802	0	5.09049719160975
ENSG00000010803	36.5026452888655	13.8838773479815	6.59765781007675	5.7555288161306	22.0566402914645	31.8513523709198	61.8233864920856	14.4961023561462	18.7719195249582	27.9865468477882	18.3762104196371	43.3989570937887	6.19501672191872	0	34.5347793614728	65.6919058066671	9.94196110997901	19.3377941339486	11.2794875408982	83.2830534262013	15.8923929583699	1.46981624464801	28.3359990328161	8.47274367585665	8.01341394134976	43.058941810267	4.00243765332624	8.1639482611352	8.36776798975916	12.3075566782111	4.07775428246406	1.43613496878271	5.09049719160975
ENSG00000010810	2.28141533055409	17.2404191244166	0	22.199896862218	2.54499695670745	6.58993497329375	9.6421795446372	0	13.6096416555947	0	8.75057639030337	0	17.2083797831076	0	5.60023449104965	0	0	19.3377941339486	16.6936415605293	0.374305858095287	0	0.734908122324005	1.8281289698591	0	0	0.861178836205339	20.0121882666312	10.4965049071738	0.522985499359948	0	0	2.87226993756543	5.09049719160975
ENSG00000010818	59.3167985944064	80.4044325536952	13.1953156201535	73.9996562073935	72.108247106711	70.2926397151333	39.7030922426238	33.4040619511196	29.5657732518092	55.4450456418446	49.8782854247292	30.8800271628881	33.0400891835665	0.728468128047135	24.2676827945485	8.21148822583339	13.2559481466387	58.4431111603781	55.946258202855	12.3520933171445	106.706067006198	61.7322822752164	57.5860625505617	80.4910649206382	187.513886227584	43.9201206464723	326.86574168831	131.789450501183	56.4824339308744	48.2834915837512	255.539268367747	205.367300535928	218.891379239219
ENSG00000011007	4.56283066110819	64.8422843174962	9.89648671511513	29.1887532818052	78.0465733390284	53.8178022818989	74.3015011969102	62.3962666634121	45.9912028361476	181.648530483758	40.2526513953955	90.1362955024843	20.6500557397291	20.3971075853198	40.1350138525225	0	49.709805549895	55.4350098506528	99.7106698615399	84.0316651423919	25.7305409802179	17.6377949357761	81.35173915873	48.0122141631877	67.312677107338	89.5625989653553	50.6975436087991	48.9836895668112	54.3904919334346	41.6563456800991	108.740114199041	15.7974846566099	15.2714915748292
ENSG00000011009	285.176916319262	262.267968804179	352.974692839106	246.254411490159	212.931412044523	263.59739893175	230.845122039255	181.516412111744	245.912145776952	258.215498274876	247.641311845585	260.393742562732	235.410635432911	260.791589840874	244.543572775835	451.631852420836	410.934392545799	214.864379266096	243.636930883401	603.755349107698	311.036833613811	370.393693651299	502.735466711253	272.539921573389	245.210466605303	192.904059309996	221.468216817385	313.728868892196	353.538197567325	281.180333340669	256.898519795235	291.535398662891	147.624418556683
ENSG00000011021	9.12566132221637	0.610280322988199	42.8847757654989	6.57774721843497	16.1183140591472	7.68825746884271	2.26874812814993	12.6053063966489	0.469297988123955	62.3096703403587	14.8759798635157	13.3535252596273	11.0133630611888	18.9401713292255	0.933372415174941	0	0	14.6107777900945	51.4344631864957	45.1038559004821	5.29746431945663	0	52.1016756409844	1.41212394597611	4.80804836480986	0.861178836205339	69.3755859909882	4.66511329207726	6.27582599231937	17.9879674527701	2.71850285497604	7.18067484391357	5.09049719160975
ENSG00000011028	38.7840606194196	0.15257008074705	32.9882890503838	0.822218402304372	10.1799878268298	6.58993497329375	7.37343141648727	18.9079595949734	38.4824350261643	0	11.3757493073944	2.50378598618012	0	14.5693625609427	31.734662115948	8.21148822583339	19.883922219958	59.3025686774425	34.7408216259664	0.748611716190574	20.4330766607613	0	0.914064484929551	0	4.80804836480986	8.61178836205339	0	4.66511329207726	9.41373898847906	17.9879674527701	1.35925142748802	0	0
ENSG00000011105	47.909721941636	61.6383126218081	29.6894601453454	27.1332072760443	34.7816250750018	37.3429648486646	72.0327530687603	36.5553885502818	70.8639962067172	36.4353157074979	47.2531125076382	8.34595328726706	100.496937933348	60.4628546279122	73.7364207988204	65.6919058066671	122.617520356408	99.6970719794685	112.794875408982	119.029262874301	55.244985045762	20.5774274250721	49.3594821861957	31.0667268114744	24.0402418240493	31.8636169395976	9.33902119109456	30.3232363985022	71.1260279129529	14.2010269363974	2.71850285497604	1.43613496878271	5.09049719160975
ENSG00000011114	193.920303097098	237.856755884651	112.160182771305	168.965881673548	68.7149178311011	158.15843935905	124.781147048246	144.33075824163	91.9824056722952	145.21321477626	110.257262517822	161.911493772981	92.2369156374565	136.952008072861	132.538882954842	213.498693871668	162.385364796324	110.010562184241	91.1382593304573	118.467804087158	68.1102555358709	66.1417310091605	42.0469663067593	135.563898813706	153.857547673915	136.066256120444	72.0438777598723	173.775470129878	66.9421439180733	139.170063976695	59.8070628094728	188.133680910536	30.5429831496585
ENSG00000011132	0	0	3.29882890503838	1.64443680460874	14.4216494213422	4.39328998219583	4.53749625629986	0	10.324555738727	0	0	0	8.94835748721593	0	0.933372415174941	0	3.31398703665967	5.1567451023863	18.9495390687089	0	0	0	0.914064484929551	1.41212394597611	0	0	30.6853553421678	0	13.5976229833586	0	2.71850285497604	0	0
ENSG00000011143	2.28141533055409	41.8042021246916	3.29882890503838	27.5443164771965	13.5733171024397	2.19664499109792	48.7780847552235	11.344775756984	1.87719195249582	76.0389197373869	13.125864585455	0.834595328726706	6.88335191324302	1.45693625609427	27.0678000400733	0	92.7916370264708	16.7594215827555	58.2021557110346	26.9500217828607	26.4873215972831	9.55380559021206	67.6407718847868	11.2969915678089	17.6295106709695	33.5859746120082	0	16.3278965222704	8.89075348911911	24.6151133564222	2.71850285497604	0	5.09049719160975
ENSG00000011198	66.1610445860687	47.4492951123325	29.6894601453454	62.8997077762844	40.7199513073192	64.8010272373885	31.1952867620615	54.8330828254227	7.03946982185932	16.8975377194193	33.2521902831528	1.66919065745341	10.3250278698645	45.8934920669695	14.0005862276241	287.402087904169	99.4196110997901	31.37019937285	29.3266676063353	26.0142571376224	23.4601991290222	101.417320880713	11.8828383040842	35.3030986494027	51.2858492246385	14.6400402154908	98.726795448714	58.3139161509657	20.396434475038	43.5498159382854	62.5255656644488	169.46392631636	45.8144747244877
ENSG00000011201	38.7840606194196	0.15257008074705	0	0	0	0	0.567187032037482	6.9329185181569	0	0.528048053731854	15.7510375025461	0	0	0	13.0672138124492	0	0	8.59457517064384	0	0	0.756780617065232	0	3.6562579397182	1.41212394597611	0	17.2235767241068	0	0	0	5.68041077455897	0	1.43613496878271	0
ENSG00000011243	50.1911372721901	69.7245269014018	6.59765781007675	100.721754282286	57.6865976853688	34.0479973620177	44.2405884989236	46.6396336676009	31.9122631924289	51.7487092657217	32.3771326441225	50.0757197236024	35.7934299488637	37.880342658451	55.0689724953215	65.6919058066671	69.5937277698531	21.9161666851418	56.3974377044909	74.4868657609621	80.2187454089146	91.1286071681766	13.7109672739433	70.6061972988054	62.5046287425282	50.809551336115	56.0341271465674	59.480194473985	47.0686949423953	48.2834915837512	58.4478113819848	87.6042330957456	30.5429831496585
ENSG00000011258	15.9699073138787	33.8705579258451	32.9882890503838	22.6110060633702	11.8766524646348	8.78657996439166	16.448423929087	8.19344915782179	18.7719195249582	64.949910609018	22.7514986147888	62.594649654503	0	0	14.0005862276241	131.383811613334	122.617520356408	11.172947721837	22.5589750817964	0.187152929047643	11.3517092559785	53.6482929296524	2.74219345478865	8.47274367585665	24.0402418240493	0.861178836205339	9.33902119109456	22.159288137367	13.5976229833586	10.4140864200248	19.0295199848323	21.5420245317407	15.2714915748292
ENSG00000011260	4.56283066110819	73.538778920078	171.539103061996	69.8885641958716	27.9949665237819	57.1127697685458	32.3296608261365	9.45397979748668	30.973667216181	34.8511715463023	53.3785159808505	0.834595328726706	20.6500557397291	16.7547669450841	38.2682690221726	0	9.94196110997901	28.7918268216569	18.9495390687089	0.187152929047643	32.541566533805	11.7585299571841	1.8281289698591	59.3092057309966	28.8482901888591	10.3341460344641	13.3414588444208	58.3139161509657	50.206607938555	23.668378227329	2.71850285497604	25.8504294380889	0
ENSG00000011275	31.9398146277573	121.598354355399	72.5742359108443	60.8441617705235	27.1466342048794	68.0959947240354	44.2405884989236	56.7238787849201	39.8903289905362	22.1780182567379	54.2535736198809	109.331988063199	45.430122627404	26.953320737744	64.402696647071	0	89.4776499898111	55.4350098506528	116.855490923705	89.0847942266783	80.2187454089146	53.6482929296524	57.5860625505617	57.8970817850204	40.0670697067488	37.0306899568296	49.363397724357	68.8104210581395	37.1319704545563	14.2010269363974	4.07775428246406	24.4142944693061	25.4524859580487
ENSG00000011295	104.945105205488	116.86868185224	108.861353866266	131.554944368699	134.884838705495	144.978569412462	196.246713084969	138.028105043305	270.784939147522	271.416699618173	210.013833367281	84.2941282013973	121.835328864402	88.1446434937034	199.741696847437	246.344646775002	182.269287016282	308.115519867582	134.451491487506	84.0316651423919	191.465496117504	131.548553895997	125.226834435348	184.98823692287	107.379746814087	161.040442370398	54.6999812621253	143.452233731376	164.217446799024	145.797209880347	19.0295199848323	179.516871097839	519.230713544194
ENSG00000011304	250.95568636095	239.229886611374	244.11333897284	152.110404426309	198.509762623181	157.060116863501	161.081117098645	164.499248476268	134.219224603451	413.989674125773	241.515908372373	191.956925607142	244.358992920127	261.520057968922	169.873779561839	147.806788065001	394.364457362501	158.140183139847	140.316825008773	168.437636142879	260.33253227044	221.207344819526	198.351993229713	160.982129841276	115.393160755437	177.4028402583	88.0536283731773	209.930098143477	177.815069782382	159.051501687651	263.694776932676	247.015214630627	66.1764634909267
ENSG00000011332	0	0	0	0	0	0	0	0.630265319832445	0	0	3.50023055612135	5.84216730108694	0	0.728468128047135	3.73348966069977	0	23.1979092566177	0	0	17.5923753304785	0.756780617065232	0	0	5.64849578390443	0	0	0	0	0.522985499359948	0	0	0	0
ENSG00000011347	132.322089172137	40.1259312364741	3.29882890503838	50.1553225405667	44.1132805829291	63.7027047418396	40.8374663066987	50.4212255865956	58.1929505273704	39.603604029889	7.00046111224269	76.782770242857	44.7417874360797	58.2774502437708	83.0701449505698	0	241.921053676156	120.324052389014	107.380721389351	42.8580207519103	77.9484035577189	18.3727030581001	74.0392232792936	66.3698254608771	28.8482901888591	31.8636169395976	8.00487530665248	9.33022658415451	28.2412169654372	38.8161402928196	4.07775428246406	70.370613470353	10.1809943832195
ENSG00000011376	2.28141533055409	12.6633167020051	26.390631240307	13.9777128391743	0	0	11.3437406407496	15.1263676759787	14.5482376318426	0	23.6265562538191	0.834595328726706	35.1050947575394	28.4102569938383	22.4009379641986	0	0	18.4783366168843	4.06061551472335	34.2489860157187	0.756780617065232	0.734908122324005	16.4531607287319	8.47274367585665	22.4375590357793	4.3058941810267	2.66829176888416	9.33022658415451	8.89075348911911	26.5085836146085	8.15550856492811	8.61680981269629	5.09049719160975
ENSG00000011405	43.3468912805278	105.120785634717	158.343787441842	228.165606639463	197.661430304278	110.930572050445	172.992044771432	248.954801333816	211.653392643904	144.685166722528	200.388199337947	65.0984356406831	143.862054986779	127.481922408249	139.072489861066	426.997387743336	99.4196110997901	136.224016454705	106.027182884443	130.445591546207	185.411251180982	85.2493421895846	83.1798681285891	148.273014327491	227.580955934333	188.598165128969	137.417026097534	137.620842116279	224.360779225418	116.448420878459	260.9762740777	142.177361909489	86.5384522573657
ENSG00000011422	508.755618713563	99.4756926470765	689.455241153021	685.319038320694	320.669616545138	667.780077293766	41.4046533387362	47.9001643072658	158.153421997773	260.855738543536	147.884740996127	1751.81559499736	62.6385024105115	41.5226832986867	57.8690897408464	5329.25585856587	1295.76893133393	198.10495768334	61.3604122224861	33.8746801576235	492.664181709466	1505.82674264189	169.101929711967	852.922863369569	1315.80256916963	149.845117499729	2991.15507291914	929.523823446393	69.5570714148731	258.458690242433	3410.36183156744	8447.34588637993	9921.3790264474
ENSG00000011426	2.28141533055409	0	0	4.52220121267404	5.93832623231738	0	6.80624438444979	0	6.10087384561141	0	45.5029972295775	0	7.57168710456733	48.0788964511109	10.2670965669244	16.4229764516668	6.62797407331934	9.02430392917603	2.25589750817964	28.6343981442894	0	11.0236218348601	1.8281289698591	28.2424789195222	8.01341394134976	16.3623978879014	8.00487530665248	16.3278965222704	1.0459709987199	14.2010269363974	2.71850285497604	1.43613496878271	5.09049719160975
ENSG00000011451	25.095568636095	68.0462560131842	3.29882890503838	22.6110060633702	19.5116433347571	48.3261898041541	30.628099730024	24.5803474734654	45.0526068598997	30.6267871164475	35.8773632002438	0.834595328726706	22.715061313702	30.5956613779797	60.6692069863712	106.749346935834	82.8496759164917	34.3783006825754	14.8889235539856	34.2489860157187	34.8119083850007	74.2257203547245	53.9298046108435	32.4788507574505	27.2456074005892	8.61178836205339	1.33414588444208	10.4965049071738	35.5630139564765	24.6151133564222	103.303108489089	5.74453987513086	0
ENSG00000011454	159.699073138787	146.772417678662	227.619194447648	136.077145581374	132.339841748787	160.355084350148	152.006124586045	116.599084169002	132.342032650955	130.427869271768	103.25680140558	144.38499186972	149.368736517374	134.038135560673	140.939234691416	57.4804175808337	291.630859226051	139.661846522962	155.205748562759	116.970580654777	93.0840158990236	155.065613810365	122.48464098056	120.030535407969	92.9556017196573	194.626416982407	84.0511907198511	125.958058886086	164.740432298384	114.554950620273	97.8661027791373	176.644601160274	300.339334304975
ENSG00000011465	0	0	0	0	0	17.5731599287833	0	0	17.3640255605863	0	0	0	0	0	0.933372415174941	0	3.31398703665967	9.88376144624042	0	0	0.756780617065232	0	0	0	1.60268278826995	0.861178836205339	0	0	6.79881149167932	0	1.35925142748802	0	0
ENSG00000011478	9.12566132221637	0	0	4.11109201152186	0.848332318902482	2.19664499109792	0.567187032037482	14.4961023561462	5.1622778693635	1.58414416119556	0	0	0	15.2978306889898	0	0	16.5699351832983	0	5.41415401963113	0	0.756780617065232	0	0	4.23637183792833	0	2.58353650861602	0	10.4965049071738	8.36776798975916	0	0	0	0
ENSG00000011485	0	0	0	13.5666036380221	11.0283201457323	14.2781924421365	25.5234164416867	33.4040619511196	25.8113893468175	34.3231234925705	0	0.834595328726706	0.688335191324302	16.026298817037	11.2004689820993	0	6.62797407331934	9.45403268770822	14.4377440523497	61.5733136566747	6.05424493652186	0	0.914064484929551	8.47274367585665	3.20536557653991	23.2518285775442	6.6707294222104	13.9953398762318	1.56895649807984	5.68041077455897	1.35925142748802	7.18067484391357	0
ENSG00000011523	2.28141533055409	47.6018651930795	0	32.8887360921749	22.0566402914645	9.88490245994062	21.5531072174243	20.7987555544707	20.1798134893301	2.11219221492741	56.8787465369719	0	22.715061313702	11.6554900487542	23.3343103793735	0	89.4776499898111	20.197251651013	0	0.374305858095287	6.05424493652186	22.7821517920442	35.6485149122525	18.3576112976894	6.41073115307981	10.3341460344641	25.3487718043995	29.1569580754829	33.9940574583966	3.78694051637265	1.35925142748802	0	10.1809943832195
ENSG00000011566	82.1309518999474	46.2287344663561	62.6777491957291	49.7442133394145	51.7482714530514	42.8345773264094	44.2405884989236	56.7238787849201	53.0306726580069	18.4816818806149	23.6265562538191	55.9178870246893	37.1701003315123	88.8731116217505	28.9345448704232	0	82.8496759164917	32.2296568899144	63.6163097306657	40.425032674291	47.6771788751096	59.5275579082444	11.8828383040842	39.539470487331	19.2321934592394	83.5343471119179	46.6951059554728	73.4755343502168	104.07411437263	18.9347025818632	6.79625713744009	15.7974846566099	10.1809943832195
ENSG00000011600	61.5982139249605	11.7478962175228	277.101628023224	151.288186024004	88.2265611658582	116.42218452819	14.7468628329745	27.7316740726276	35.1973491092966	4.75243248358668	88.380821542064	246.205621974378	50.2484689666741	0.728468128047135	38.2682690221726	385.939946614169	69.5937277698531	46.4107059214767	5.86533352126705	1.12291757428586	94.597577133154	354.960623082494	8.22658036436596	176.515493247014	307.715095347831	64.5884127154005	1791.75792280571	484.005504053015	7.84478249039922	78.5790157147324	288.16130262746	1344.22233078062	554.864193885462
ENSG00000011638	41.0654759499737	112.901859752817	9.89648671511513	56.3219605578495	56.8382653664663	51.621157290801	50.4796458513359	28.9922047122925	77.9034660285765	25.8743546328608	24.5016138928494	1.66919065745341	129.407015968969	187.216308908114	29.8679172855981	73.9033940325005	66.2797407331934	19.3377941339486	84.3705668059184	58.9531726500077	66.5966943017405	59.5275579082444	27.4219345478865	35.3030986494027	78.5314566252277	28.4189015947762	56.0341271465674	29.1569580754829	26.1492749679974	35.029199776447	47.5737999620806	22.9781595005234	5.09049719160975
ENSG00000011677	0	0.15257008074705	0	0.822218402304372	0	0	17.582797993162	4.41185723882712	6.57017183373537	0	0.875057639030337	0	7.57168710456733	0	0	0	0	0	34.2896421243305	0.187152929047643	0.756780617065232	0	0.914064484929551	4.23637183792833	0	0	0	1.16627832301931	0	0	0	0	5.09049719160975
ENSG00000012048	2.28141533055409	17.2404191244166	26.390631240307	29.5998624829574	7.63499087012234	10.9832249554896	8.50780548056223	0.630265319832445	17.3640255605863	0.528048053731854	35.0023055612135	72.6097935992234	7.57168710456733	0.728468128047135	9.33372415174941	65.6919058066671	89.4776499898111	11.6026764803692	1.35353850490778	38.5535033838145	8.32458678771756	45.5643035840883	10.9687738191546	38.1273465413549	17.6295106709695	5.16707301723204	32.0195012266099	41.9860196286953	9.41373898847906	25.5618484855154	4.07775428246406	35.9033742195679	529.411707927414
ENSG00000012061	20.5327379749868	4.88224258390559	46.1836046705373	40.6998109140664	24.601637248172	14.2781924421365	9.07499251259972	25.2106127932978	30.973667216181	45.9401806746713	21.8764409757584	15.8573112458074	23.4033965050263	38.6088107864982	24.2676827945485	90.3263704841673	9.94196110997901	40.394503302026	12.18184654417	73.1767952576286	34.8119083850007	11.7585299571841	5.4843869095773	38.1273465413549	4.80804836480986	30.1412592671869	28.0170635732837	22.159288137367	12.0286664852788	17.0412323236769	47.5737999620806	22.9781595005234	10.1809943832195
ENSG00000012124	0	0	0	0	0	1.09832249554896	0	0	4.22368189311559	0	5.25034583418202	0.834595328726706	2.06500557397291	0	2.80011724552482	32.8459529033335	0	0.429728758532192	0	0	0	0	0	0	8.01341394134976	9.47296719825873	1.33414588444208	0	0	0	0	0	5.09049719160975
ENSG00000012171	0	0.3051401614941	6.59765781007675	2.46665520691312	16.1183140591472	16.4748374332344	1.13437406407496	0.630265319832445	30.973667216181	19.0097299343467	0.875057639030337	0	4.13001114794581	0.728468128047135	0.933372415174941	0	3.31398703665967	4.29728758532192	0	0	3.78390308532616	9.55380559021206	2.74219345478865	9.88486762183276	0	6.88943068964271	24.0146259199574	20.9930098143477	15.1665794814385	7.57388103274529	6.79625713744009	30.158834344437	0
ENSG00000012174	13.6884919833246	82.2352735226598	0	2.46665520691312	1.69666463780496	16.4748374332344	33.4640348902115	30.2527353519574	18.7719195249582	6.33657664478224	11.3757493073944	16.6919065745341	28.2217428442964	29.8671932499326	14.0005862276241	0	39.767844439916	24.9242679948671	6.31651302290298	34.623291873814	25.7305409802179	40.4199467278203	0.914064484929551	21.1818591896416	19.2321934592394	14.6400402154908	1.33414588444208	13.9953398762318	9.41373898847906	15.1477620654906	1.35925142748802	20.105889562958	86.5384522573657
ENSG00000012223	0	41.3464918824505	46.1836046705373	0	4.24166159451241	10.9832249554896	14.7468628329745	7.56318383798934	1.40789396437186	0.528048053731854	3.50023055612135	0	6.88335191324302	0	35.4681517766478	0	0	8.16484641211165	0.451179501635927	0.187152929047643	18.9195154266308	46.2992117064123	0.914064484929551	31.0667268114744	17.6295106709695	13.7788613792854	37.3560847643783	48.9836895668112	0	0	42.1367942521286	127.816012221662	30.5429831496585
ENSG00000012232	0	7.62850403735249	16.4941445251919	22.6110060633702	16.9666463780496	14.2781924421365	12.4781147048246	0	11.2631517149749	66.0060067164817	13.125864585455	26.7070505192546	2.06500557397291	0	16.8007034731489	41.0574411291669	3.31398703665967	8.59457517064384	38.3502576390538	49.9698320557208	14.3788317242394	26.4566924036642	31.9922569725343	12.709115513785	17.6295106709695	6.02825185343738	54.6999812621253	24.4918447834056	26.1492749679974	21.7749079691427	4.07775428246406	101.965582783573	20.361988766439
ENSG00000012660	95.8194438832719	77.2004608580072	0	79.7551850235241	128.098180154275	77.980897183976	117.407715631759	56.0936134650876	57.7236525392465	280.921564585346	132.133703493581	151.896349828261	25.4684020789992	2.18540438414141	65.3360690622459	180.652740968335	16.5699351832983	68.3268726066185	78.0540537830154	80.4757594904867	47.6771788751096	195.485560538185	44.789159761548	135.563898813706	84.9421877783075	122.287394741158	352.214513492709	114.295275655893	43.4077964468757	66.2714590365213	127.769634183874	320.258098038545	183.257898897951
ENSG00000012779	34.2212299583114	31.8871468761334	13.1953156201535	24.6665520691312	4.24166159451241	36.2446423531156	0	21.4290208743031	6.10087384561141	23.7621624179334	14.0009222244854	71.7751982704967	0	0	0.933372415174941	16.4229764516668	3.31398703665967	0.429728758532192	0.902359003271854	0.374305858095287	18.9195154266308	47.7690279510603	21.9375476383092	26.8303549735461	19.2321934592394	0.861178836205339	177.441402630797	13.9953398762318	0	8.52061616183845	63.8848170919369	163.719386441229	407.23977532878
ENSG00000012817	0	0	0	2.8777644080653	18.6633110158546	0	0	0	0	105.081562692639	0	0	0	0.728468128047135	0	0	0	0	0	0.374305858095287	1.51356123413046	13.9632543241561	1.8281289698591	1.41212394597611	14.4241450944296	1.72235767241068	8.00487530665248	0	8.36776798975916	6.62714590365213	0	1.43613496878271	5.09049719160975
ENSG00000012822	0	7.17079379511134	0	19.7332416553049	30.5399634804894	28.5563848842729	25.5234164416867	27.1014087527951	6.57017183373537	1.58414416119556	24.5016138928494	26.7070505192546	8.26002229589163	6.55621315242422	17.7340758883239	0	66.2797407331934	5.5864738609185	12.18184654417	0.187152929047643	24.9737603631527	17.6377949357761	22.8516121232388	5.64849578390443	28.8482901888591	11.1953248706694	16.009750613305	73.4755343502168	14.1206084827186	25.5618484855154	1.35925142748802	2.87226993756543	0
ENSG00000012963	38.7840606194196	115.190410964023	0	43.1664661209795	45.8099452207341	25.261417397626	23.2546683135368	41.5975111089414	50.6841827173871	38.5475079224253	39.3775937563651	75.9481749141303	72.963530280376	13.8408944328956	35.4681517766478	8.21148822583339	0	36.5269444752363	26.1684110948838	84.2188180714395	38.5958114703269	63.9370066421884	10.0547093342251	33.8909747034266	6.41073115307981	12.0565037068748	22.6804800355154	15.1616181992511	12.5516519846387	23.668378227329	6.79625713744009	60.317668688874	20.361988766439
ENSG00000012983	45.6283066110819	159.130594219173	39.5859468604605	100.310645081133	109.43486913842	62.6043822462906	125.915521112321	105.254308412018	64.7631223611058	93.9925535642699	85.755648624973	10.0151439447205	118.39365290778	104.899410438787	92.4038691023192	114.960835161667	192.211248126261	130.637542593786	41.0573346488694	54.8358082109595	123.355240581633	108.766402103953	103.289286797039	57.8970817850204	126.611940273326	103.341460344641	60.0365647998936	94.4685441645644	116.102780857908	120.235361394832	40.7775428246406	90.476503033311	25.4524859580487
ENSG00000013016	0	25.1740633232632	69.2754070058059	4.11109201152186	4.24166159451241	6.58993497329375	25.5234164416867	0.630265319832445	0	40.6597001373527	15.7510375025461	30.0454318341614	4.13001114794581	1.45693625609427	14.9339586427991	90.3263704841673	0	3.00810130972534	19.4007185703449	14.4107755366685	0	10.2887137125361	0.914064484929551	4.23637183792833	4.80804836480986	13.7788613792854	24.0146259199574	0	21.9653909731178	0	0	0	0
ENSG00000013275	29.6583992972032	54.0098085844556	42.8847757654989	63.3108169774366	70.411582468906	60.4077372551927	118.542089695834	56.0936134650876	51.622778693635	62.8377183940906	61.2540347321236	9.18054861599377	108.75696022924	69.2044721644779	54.1356000801466	90.3263704841673	53.0237925865547	87.234937982035	51.4344631864957	93.3893115947741	118.814556879241	105.826769614657	260.508378204922	53.6607099470921	72.1207254721479	105.924996853257	60.0365647998936	99.1336574566417	107.735012868149	122.128831653018	129.128885611362	117.763067440183	55.9954691077072
ENSG00000013288	118.633597188813	53.5520983422145	56.0800913856524	38.6442649083055	44.1132805829291	39.5396098397625	62.3905735241231	48.5304296270983	113.100815137873	101.913274370248	19.2512680586674	33.3838131490682	55.7551504972685	90.3300478778448	38.2682690221726	0	3.31398703665967	90.2430392917603	44.2155911603209	62.5090783019129	28.0008828314136	22.0472436697201	61.2423204902799	48.0122141631877	28.8482901888591	55.9766243533471	54.6999812621253	54.8150811819078	63.8042309219136	43.5498159382854	66.6033199469129	112.018527565052	229.072373622439
ENSG00000013293	0	0	0	7.39996562073935	0	0	0	0	0	0	0	0	0	0	0	0	0	0	0	0	0	7.34908122324005	0	0	1.60268278826995	2.58353650861602	0	0	0	0	0	0	0
ENSG00000013297	0	0	0	0	1.69666463780496	0	4.53749625629986	0	7.97806579810723	0	0	0	0	0.728468128047135	0	0	0	9.88376144624042	0	0	0	0	0.914064484929551	0	0	0	6.6707294222104	2.33255664603863	1.0459709987199	0.946735129093162	0	15.7974846566099	0
ENSG00000013306	34.2212299583114	49.2801360812971	59.3789202906908	95.3773346673071	86.5298965280532	63.7027047418396	76.0030622930226	75.6318383798934	61.9473344323621	88.1840249732196	89.2558791810943	27.5416458479813	128.718680777645	93.9723885180805	62.5359518167211	73.9033940325005	9.94196110997901	56.7241961262493	63.6163097306657	137.183096991923	67.3534749188057	57.3228335412724	106.031480251828	84.7274367585665	49.6831664363685	157.595727025577	42.6926683021466	44.3185762747339	84.7236508963115	111.714745232993	78.8365827943051	48.8285889386123	20.361988766439
ENSG00000013364	189.35747243599	120.530363790169	95.6660382461129	111.821702713395	121.311521603055	142.781924421365	109.467097183234	113.44775756984	96.2060875654108	229.700903373356	139.134164605824	65.9330309694098	129.407015968969	82.3168984693263	98.0041035933688	57.4804175808337	119.303533319748	125.910526249932	178.215903146191	205.68106902336	135.463730454677	155.800521932689	238.570830566613	88.9638085964948	139.433402579486	114.53678521531	314.858428728331	76.9743693192747	81.0627524007919	123.075566782111	179.421188428418	196.750490723232	346.153809029463
ENSG00000013374	175.668980452665	308.191563109041	211.125049922456	246.254411490159	121.311521603055	258.105786454005	215.531072174243	206.727024905042	154.868336080905	78.1511119523143	139.134164605824	125.189299309006	222.33226679775	261.520057968922	201.608441677787	246.344646775002	261.804975896114	212.715735473435	174.155287631468	176.29805916288	121.084898730437	113.910758960221	255.938055780274	192.048856652751	272.456074005892	180.847555603121	392.238890025972	150.449903669492	179.384026280462	251.831544338781	169.906428436002	334.619447726372	488.687730394536
ENSG00000013375	22.8141533055409	36.0065390563038	0	41.1109201152186	30.5399634804894	1.09832249554896	31.1952867620615	49.1606949469307	42.7061169192799	40.1316520836209	34.1272479221831	2.50378598618012	23.4033965050263	23.3109800975083	42.9351310980473	0	0	16.3296928242233	50.9832836848598	2.99444686476229	28.0008828314136	0.734908122324005	18.281289698591	8.47274367585665	30.4509729771291	45.642478318883	14.6756047288629	15.1616181992511	33.4710719590367	22.7216430982359	0	18.6697545941753	0
ENSG00000013392	0	22.7329420313104	0	9.04440242534809	0	5.49161247774479	1.13437406407496	0	0.469297988123955	70.2303911463365	7.87551875127303	0	2.06500557397291	0	0	8.21148822583339	0	2.14864379266096	0	0	0	0	0	4.23637183792833	0	0	1.33414588444208	0	14.1206084827186	1.89347025818632	0	1.43613496878271	0
ENSG00000013441	61.5982139249605	87.4226562680595	141.84964291665	174.310301288527	127.249847835372	180.124889270029	176.962353995694	122.901737367327	169.885871700872	76.5669677911188	174.136470167037	189.453139620962	112.198636185861	84.5023028534677	62.5359518167211	591.227152260004	311.514781446009	150.405065486267	301.387907092799	146.540743444305	116.544215028046	396.115477932639	186.469154925628	127.09115513785	233.991687087413	168.791051896247	376.229139412667	359.213723489949	128.654432842547	157.158031429465	299.035314047364	627.590981358046	707.579109633755
ENSG00000013503	29.6583992972032	5.33995282614674	3.29882890503838	16.4443680460874	34.7816250750018	9.88490245994062	25.5234164416867	21.4290208743031	54.4385666223788	35.3792196000342	39.3775937563651	49.2411243948757	34.4167595662151	0	27.0678000400733	8.21148822583339	56.3377796232144	36.0972157167041	13.5353850490778	28.8215510733371	8.32458678771756	0	16.4531607287319	19.7697352436655	38.4643869184789	38.7530476292403	1.33414588444208	4.66511329207726	26.1492749679974	4.73367564546581	58.4478113819848	2.87226993756543	15.2714915748292
ENSG00000013523	2.28141533055409	4.88224258390559	0	3.28887360921749	5.93832623231738	9.88490245994062	5.67187032037482	0	6.10087384561141	34.8511715463023	4.37528819515168	0.834595328726706	7.57168710456733	0	2.80011724552482	0	0	10.7432189633048	13.0842055474419	32.9389155123852	5.29746431945663	0	18.281289698591	0	0	10.3341460344641	1.33414588444208	0	0	4.73367564546581	1.35925142748802	1.43613496878271	0
ENSG00000013561	38.7840606194196	19.9866805778635	0	60.0219433682191	44.1132805829291	30.7530298753708	73.7343141648727	78.1528996592232	82.1271479216921	88.7120730269514	45.5029972295775	58.4216730108694	58.5084912625657	62.6482590120536	75.6031656291702	123.172323387501	62.9657536965337	58.4431111603781	55.946258202855	82.3472887809631	25.7305409802179	3.67454061162003	96.8908354025324	49.4243381091638	44.8751180715587	106.786175689462	13.3414588444208	34.9883496905794	55.4364629321545	53.9639023583102	42.1367942521286	15.7974846566099	147.624418556683
ENSG00000013563	25.095568636095	5.64509298764084	0	41.933138517523	11.0283201457323	37.3429648486646	15.8812368970495	28.9922047122925	16.4254295843384	2.64024026865927	20.1263256976977	0	19.2733853570805	1.45693625609427	20.5341931338487	0	3.31398703665967	3.43783006825754	9.02359003271854	15.1593872528591	21.9466378948917	5.14435685626804	0	4.23637183792833	4.80804836480986	2.58353650861602	29.3512094577258	9.33022658415451	19.873448975678	27.4553187437017	1.35925142748802	22.9781595005234	0
ENSG00000013573	2.28141533055409	0	0	18.4999140518484	32.2366281182943	46.1295448130562	4.53749625629986	3.78159191899467	4.22368189311559	10.5609610746371	21.0013833367281	1.66919065745341	26.8450724616478	28.4102569938383	21.4675655490237	8.21148822583339	6.62797407331934	43.4026046117514	0.451179501635927	71.3052659671521	48.4339594921749	14.6981624464801	0.914064484929551	7.06061972988054	4.80804836480986	14.6400402154908	1.33414588444208	1.16627832301931	23.0113619718377	17.9879674527701	0	0	5.09049719160975
ENSG00000013583	11.4070766527705	19.3764002548753	6.59765781007675	13.9777128391743	19.5116433347571	15.3765149376854	40.8374663066987	11.9750410768165	87.7587237791796	0.528048053731854	2.62517291709101	15.8573112458074	30.2867484182693	64.1051952681479	19.6008207186738	24.6344646775002	3.31398703665967	33.518843165511	18.0471800654371	57.6431021466742	24.9737603631527	27.1916005259882	28.3359990328161	52.248586001116	48.0804836480986	48.226014827499	25.3487718043995	6.99766993811588	31.9021154609568	10.4140864200248	78.8365827943051	68.9344785015703	96.7194466405852
ENSG00000013588	294.302577641478	495.852762427912	336.480548313914	309.154119266444	558.202665837833	441.525643210681	294.937256659491	322.695843754212	338.833147425495	319.469072507771	539.035505642687	148.557968513354	304.932489756666	479.332028255015	177.340758883239	615.861616937504	145.815429613025	194.667127615083	339.286985230217	178.169588453357	535.800676882185	670.236207559493	439.665017251114	329.024879412433	237.197052663953	248.880683663343	364.221826452688	325.391652122389	516.186687868268	373.960375991799	440.397462506118	292.971533631674	483.597233202926
ENSG00000013725	0	22.2752317890693	0	0	0	0	1.13437406407496	0	1.87719195249582	0	0	10.8497392734472	0	0	0	0	0	7.30538889504726	19.4007185703449	0	0.756780617065232	42.6246710947923	10.0547093342251	2.82424789195222	35.259021341939	0	1.33414588444208	1.16627832301931	0	0	1.35925142748802	0	0
ENSG00000013810	34.2212299583114	10.5273355715464	23.0918023352686	83.0440586327416	47.506609858539	45.0312223175073	25.5234164416867	11.344775756984	43.6447128955278	40.6597001373527	21.8764409757584	20.0302878894409	26.1567372703235	49.5358327072052	21.4675655490237	632.284593389171	165.699351832983	73.4836177090048	9.02359003271854	64.3806075923893	67.3534749188057	232.230966654386	106.945544736757	74.8425691367337	48.0804836480986	39.6142264654456	497.636414896896	73.4755343502168	26.1492749679974	44.4965510673786	199.809959840739	584.506932294565	1425.33921365073
ENSG00000014123	139.1663351638	135.939941945621	85.7695515309978	64.5441445808932	92.4682227603706	75.7842521928781	149.170189425858	111.556961610343	83.06574389794	220.724086459915	140.009222244854	72.6097935992234	77.7818766196462	90.3300478778448	140.939234691416	57.4804175808337	82.8496759164917	92.3916830844213	126.781439959696	204.745304378122	119.571337496307	69.0813634984565	63.070449460139	117.206287516017	81.7368222017676	56.8378031895524	20.0121882666312	85.1383175804099	121.855621350868	76.6855454565461	96.5068513516493	60.317668688874	15.2714915748292
ENSG00000014138	50.1911372721901	19.5289703356224	0	35.7665005002402	11.8766524646348	5.49161247774479	20.9859201853868	3.15132659916223	16.8947275724624	1.05609610746371	7.00046111224269	0	6.88335191324302	7.28468128047135	29.8679172855981	0	33.1398703665967	17.6188790998199	22.5589750817964	8.79618766523924	45.4068370239139	6.61417310091605	1.8281289698591	18.3576112976894	6.41073115307981	9.47296719825873	0	1.16627832301931	20.396434475038	16.0944971945837	1.35925142748802	0	0
ENSG00000014164	36.5026452888655	20.9021010623458	0	0	5.93832623231738	7.68825746884271	2.26874812814993	0.630265319832445	0.469297988123955	0	14.0009222244854	0	5.50668153059442	0	6.53360690622459	0	0	2.14864379266096	7.67005152781076	0	21.1898572778265	0.734908122324005	0.914064484929551	8.47274367585665	6.41073115307981	0.861178836205339	17.343896497747	0	4.18388399487958	3.78694051637265	0	20.105889562958	127.262429790244
ENSG00000014216	191.638887766544	253.266334040103	75.8730648158827	138.543800788287	236.684716973793	244.925916507418	241.621675647967	99.5819205335263	206.960412762664	195.377779880786	166.260951415764	196.129902250776	176.902144170346	225.096651566565	249.210434851709	426.997387743336	328.084716629307	405.234219295857	243.636930883401	224.396361928124	399.580165810443	127.874013284377	404.016502338861	132.739650921754	141.036085367756	142.094507973881	118.738983715345	72.3092560271975	191.935678265101	148.637415267626	285.442799772484	156.538711597316	229.072373622439
ENSG00000014257	0	0	3.29882890503838	5.7555288161306	18.6633110158546	6.58993497329375	6.23905735241231	7.56318383798934	19.2412175130822	1.05609610746371	14.0009222244854	0.834595328726706	13.0783686351617	11.6554900487542	14.9339586427991	0	99.4196110997901	21.9161666851418	0	14.9722343238115	4.54068370239139	24.9868761590162	19.1953541835206	1.41212394597611	22.4375590357793	11.1953248706694	26.6829176888416	8.1639482611352	16.2125504801584	33.1357295182607	0	61.7538036576567	0
ENSG00000014641	59.3167985944064	77.0478907772602	6.59765781007675	113.055030316851	130.643177110982	66.9976722284864	161.081117098645	226.265249819848	79.7806579810723	138.876638131478	141.759337522915	32.5492178203415	178.967149744319	82.3168984693263	159.606682994915	0	212.095170346219	118.605137354885	73.0910792650202	51.0927496300067	86.2729903454365	19.1076111804241	102.37522231211	138.388146705659	137.830719791216	170.513409568657	57.3682730310095	99.1336574566417	85.2466363956715	117.395156007552	88.3513427867212	31.5949693132197	254.524859580487
ENSG00000014824	41.0654759499737	54.7726589881909	65.9765781007675	42.7553569198273	74.6532440634185	104.340637077151	63.524947588198	120.380676087997	75.0876780998328	79.207208059778	84.8805909859426	29.2108365054347	68.1451839411059	117.283368615589	130.672138124492	24.6344646775002	6.62797407331934	82.937650396713	93.3941568386369	27.3243276409559	12.1084898730437	68.3464553761325	35.6485149122525	80.4910649206382	80.1341394134976	114.53678521531	40.0243765332624	50.1499678898305	84.7236508963115	51.1236969710307	172.624931290978	83.2958281893974	0
ENSG00000014914	0	0	0	6.57774721843497	0	12.0815474510385	0	5.04212255865956	3.75438390499164	0	0	0	0	0	1.86674483034988	0	3.31398703665967	1.71891503412877	0	0	0	0	0	2.82424789195222	0	0	0	0	0	0	0	1.43613496878271	0
ENSG00000014919	0	0.15257008074705	32.9882890503838	9.86662082765246	26.298301885977	18.6714824243323	20.9859201853868	16.3868983156436	14.0789396437186	62.3096703403587	21.0013833367281	14.188120588354	28.9100780356207	59.7343864998651	15.867331057974	0	6.62797407331934	8.16484641211165	28.4243086030634	11.7906345300015	61.2992299822838	11.0236218348601	49.3594821861957	8.47274367585665	6.41073115307981	18.0847555603121	26.6829176888416	3.49883496905794	12.0286664852788	4.73367564546581	1.35925142748802	10.052944781479	10.1809943832195
ENSG00000015133	143.729165824908	66.2154150442196	145.148471821689	231.043371047528	100.103213630493	63.7027047418396	124.213960016209	168.280840395263	129.056946734088	123.035196519522	104.13185904461	37.5567897927018	23.4033965050263	50.9927689632995	81.2034001202199	98.5378587100006	198.83922219958	118.175408596353	129.939696471147	174.613682801451	139.247633540003	76.4304447216965	77.6954812190118	83.3153128125904	89.7502361431173	35.3083322844189	49.363397724357	71.1429777041782	81.5857379001519	131.596182943949	10.8740114199041	63.1899386264394	91.6289494489754
ENSG00000015153	25.095568636095	27.0049042922278	9.89648671511513	23.8443336668268	17.8149786969521	41.7362548308604	35.7327830183614	44.1185723882712	26.7499853230654	0.528048053731854	14.0009222244854	29.2108365054347	30.2867484182693	56.0920458596294	50.4021104194468	8.21148822583339	0	16.7594215827555	0	20.3996692661931	14.3788317242394	27.1916005259882	0.914064484929551	24.0061070815938	25.6429246123192	13.7788613792854	57.3682730310095	41.9860196286953	32.9480864596767	34.0824646473538	1.35925142748802	11.4890797502617	0
ENSG00000015171	86.6937825610556	104.510505311729	49.4824335755756	113.055030316851	67.8665855121986	128.503731979228	136.124887688996	134.876778444143	170.82446767712	315.772736131648	203.013372255038	163.580684430434	90.8602452548079	93.2439203900333	173.607269222539	24.6344646775002	29.825883329937	111.299748459838	118.660208930249	185.468552686215	63.5695718334795	47.0341198287363	4.57032242464775	165.218501679205	129.817305849866	113.675606379105	37.3560847643783	137.620842116279	176.246113284302	138.223328847602	17.6702685573442	17.2336196253926	25.4524859580487
ENSG00000015285	98.100859213826	22.2752317890693	234.216852257725	38.2331557071533	30.5399634804894	20.8681274154302	6.80624438444979	2.52106127932978	13.1403436674707	0.528048053731854	33.2521902831528	106.828202077018	0	0	9.33372415174941	599.438640485837	33.1398703665967	31.37019937285	13.0842055474419	20.9611280533361	42.379714555653	74.9606284770485	12.7969027890137	50.8364620551399	68.915359895608	6.88943068964271	282.838927501721	106.131327394758	13.5976229833586	41.6563456800991	0	285.79085878776	707.579109633755
ENSG00000015475	2.28141533055409	34.3282681680862	204.527392112379	46.455339730197	33.0849604371968	39.5396098397625	45.3749625629986	52.3120215460929	20.1798134893301	51.7487092657217	55.1286312589112	0	37.1701003315123	7.28468128047135	38.2682690221726	213.498693871668	89.4776499898111	37.3864019923007	46.0203091668646	0.187152929047643	72.6509392382623	118.320207694165	59.4141915204208	81.9031888666143	91.3529189313873	22.3906497413388	454.943746594749	187.77081000611	30.333158962877	101.300658812968	67.9625713744009	239.834539786713	549.773696693853
ENSG00000015479	317.116730947019	198.798815213406	336.480548313914	307.098573260683	184.936445520741	215.271209127596	219.501381398506	208.617820864539	197.574453000185	205.410692901691	340.397421582801	270.408886507453	202.370546249345	169.004605706935	281.878469382832	147.806788065001	291.630859226051	229.47515705619	157.010466569303	238.619984535745	107.462847623263	229.29133416509	206.578573594078	293.721780763031	173.089741133155	131.760361939417	177.441402630797	177.274305098936	183.044924775982	236.68378227329	120.973377046434	295.843803569239	81.4479550657559
ENSG00000015532	4.56283066110819	31.8871468761334	62.6777491957291	19.7332416553049	16.9666463780496	17.5731599287833	31.1952867620615	12.6053063966489	15.0175356199666	4.22438442985483	14.8759798635157	0	11.7016982525131	1.45693625609427	20.5341931338487	8.21148822583339	26.5118962932774	9.88376144624042	22.5589750817964	15.9079989690497	24.2169797460874	8.08398934556405	15.5390962438024	48.0122141631877	22.4375590357793	47.3648359912937	2.66829176888416	4.66511329207726	30.333158962877	28.4020538727948	4.07775428246406	11.4890797502617	0
ENSG00000015676	50.1911372721901	111.833869187588	16.4941445251919	49.7442133394145	44.9616129018316	74.6859296973291	98.1233565424844	88.8674100963748	80.7192539573202	158.942464173288	42.0027666734562	75.9481749141303	70.2101895150788	115.826432359495	110.137944990643	57.4804175808337	135.873468503046	56.7241961262493	90.6870798288214	99.5653582533463	62.8127912164143	41.1548548501443	139.851866194221	101.67292411028	59.2992631659883	48.226014827499	49.363397724357	93.3022658415451	65.3731874199935	107.92780471662	188.935948420835	51.7008588761777	30.5429831496585
ENSG00000016082	25.095568636095	30.51401614941	6.59765781007675	25.0776612702833	7.63499087012234	16.4748374332344	31.1952867620615	21.4290208743031	31.9122631924289	43.299940406012	10.500691668364	0	1.3766703826486	0	7.46697932139953	0	0	21.9161666851418	13.5353850490778	0	14.3788317242394	10.2887137125361	1.8281289698591	5.64849578390443	4.80804836480986	4.3058941810267	1.33414588444208	36.1546280135987	25.1033039692775	0	2.71850285497604	20.105889562958	0
ENSG00000016391	66.1610445860687	36.0065390563038	46.1836046705373	9.86662082765246	7.63499087012234	13.1798699465875	11.9109276727871	17.017163635476	22.0570054418259	0	0.875057639030337	60.0908636683228	3.44167595662151	52.4497052193937	7.46697932139953	0	3.31398703665967	36.5269444752363	13.0842055474419	0.187152929047643	12.1084898730437	0	8.22658036436596	11.2969915678089	9.61609672961972	33.5859746120082	13.3414588444208	13.9953398762318	21.4424054737579	2.84020538727948	0	17.2336196253926	310.520328688195
ENSG00000016402	4.56283066110819	107.409336845923	69.2754070058059	116.755013127221	61.0799269609787	26.359739893175	52.1812069474484	105.884573731851	72.2718901710891	87.6559769194877	63.0041500101842	30.0454318341614	56.4434856885928	75.0322171888549	83.0701449505698	0	172.327325906303	109.151104667177	104.222464877899	63.2576900181035	79.4619647918494	54.3832010519764	85.9220615833778	81.9031888666143	51.2858492246385	64.5884127154005	5.33658353776832	55.9813595049271	37.1319704545563	53.0171672292171	104.662359916577	2.87226993756543	30.5429831496585
ENSG00000016602	109.507935866596	0.3051401614941	105.562524961228	115.110576322612	96.709884354883	17.5731599287833	73.7343141648727	36.5553885502818	23.4648994061977	0.528048053731854	268.642695182313	0	31.6634188009179	11.6554900487542	59.7358345711962	98.5378587100006	112.675559246429	18.9080653754164	11.7306670425341	0.374305858095287	18.1627348095656	137.427818874589	12.7969027890137	26.8303549735461	67.312677107338	140.37215030147	60.0365647998936	118.96038894797	36.6089849551963	53.9639023583102	290.879805482436	11.4890797502617	5.09049719160975
ENSG00000016864	6.84424599166228	52.4841077769851	3.29882890503838	38.2331557071533	26.298301885977	26.359739893175	57.2858902357857	34.6645925907845	11.7324497030989	15.3133935582238	31.5020750050921	29.2108365054347	41.3001114794581	10.927021920707	70.0029311381206	0	72.9077148065127	6.01620261945069	60.4580532192142	106.302863699061	39.3525920873921	2.20472436697202	12.7969027890137	63.5455775689249	14.4241450944296	26.6965439223655	14.6756047288629	12.8290615532125	19.873448975678	56.8041077455897	133.206639893826	1.43613496878271	10.1809943832195
ENSG00000017260	139.1663351638	66.2154150442196	9.89648671511513	51.7997593451754	108.586536819518	81.2758646706229	78.83899745321	132.985982484646	93.390299636667	246.598441092776	80.505302790791	61.7600543257763	106.691954655267	136.223539944814	66.2694414774208	8.21148822583339	89.4776499898111	104.424088323323	110.990157402438	36.4948211642905	105.949286389133	35.2755898715522	88.6642550381664	55.0728338930682	133.022671426406	121.426215904953	57.3682730310095	67.6441427351202	117.148751856628	96.5669831675025	66.6033199469129	50.264723907395	50.9049719160975
ENSG00000017427	36.5026452888655	15.257008074705	13.1953156201535	26.3109888737399	111.979866095128	2.19664499109792	24.3890423776117	12.6053063966489	18.7719195249582	0.528048053731854	16.6260951415764	72.6097935992234	41.3001114794581	0.728468128047135	20.5341931338487	0	0	9.45403268770822	13.0842055474419	0	46.9203982580444	35.2755898715522	1.8281289698591	14.1212394597611	25.6429246123192	23.2518285775442	2.66829176888416	27.9906797524635	14.1206084827186	18.9347025818632	4.07775428246406	4.30840490634814	503.959221969365
ENSG00000017483	2.28141533055409	0	0	0	1.69666463780496	9.88490245994062	0	0	5.63157585748746	0	13.125864585455	0.834595328726706	0	0	0	0	0	9.88376144624042	8.57241053108262	0.187152929047643	0.756780617065232	0	13.7109672739433	0	1.60268278826995	4.3058941810267	0	3.49883496905794	2.09194199743979	3.78694051637265	0	0	0
ENSG00000017797	180.231811113773	203.375917635817	263.90631240307	198.976853357658	217.173073639035	232.844369056379	157.67799490642	97.691124574029	179.271831463351	192.209491558395	198.638084059886	211.987213496583	152.122077282671	185.030904523972	171.740524392189	106.749346935834	13.2559481466387	131.067271352319	112.794875408982	182.286952892405	137.734072305872	135.223094507617	135.281543769574	184.98823692287	149.049499309106	117.981500560131	281.504781617279	131.789450501183	129.700403841267	142.957004493067	353.405371146885	317.38582810098	773.755573124681
ENSG00000018189	66.1610445860687	47.7544352738266	49.4824335755756	75.6440930120022	83.9848995713457	76.8825746884271	55.5843291396733	139.28863568297	90.5745117079233	48.5804209433305	88.380821542064	20.0302878894409	57.1318208799171	167.547669450841	77.4699104595201	139.595299839168	112.675559246429	107.432189633048	55.946258202855	118.280651158111	68.8670361529362	52.9133848073284	54.843869095773	52.248586001116	52.8885320129084	88.70142012915	28.0170635732837	65.3115860890816	49.1606369398351	75.7388103274529	10.8740114199041	34.4672392507851	183.257898897951
ENSG00000018236	0	0	0	0	7.63499087012234	0	5.10468328833734	0	0	0	0	0	0	0	0	0	0	0	0	0	0	0	0	0	0	1.72235767241068	0	0	0	0	0	0	0
ENSG00000018280	141.447750494354	33.1077075221098	973.154526986321	231.043371047528	89.9232258036631	171.338309305637	7.37343141648727	9.45397979748668	21.5877074537019	15.3133935582238	147.009683357097	355.537610037577	3.44167595662151	0.728468128047135	14.0005862276241	1790.10443323168	212.095170346219	32.2296568899144	34.7408216259664	0.56145878714293	91.5704546648931	688.608910617593	31.0781924876047	168.042749571157	149.049499309106	43.9201206464723	1897.15544767664	435.021814486204	15.6895649807984	126.862507298484	546.419073850183	1558.20644112925	1394.79623050107
ENSG00000018408	70.7238752471769	58.281770845373	3.29882890503838	25.4887704714355	49.203274496344	46.1295448130562	58.4202642998607	83.1950222178828	79.7806579810723	100.857178262784	78.7551875127303	62.594649654503	58.5084912625657	26.953320737744	58.8024621560213	0	6.62797407331934	68.3268726066185	3.15825651145149	42.8580207519103	72.6509392382623	50.7086604403563	124.312769950419	25.4182310275699	65.7099943190681	90.4237778015606	33.353647111052	57.1476378279464	62.7582599231937	52.0704321001239	91.0698456416972	21.5420245317407	132.352926981853
ENSG00000018510	13.6884919833246	33.565417764351	16.4941445251919	13.5666036380221	24.601637248172	35.1463198575667	23.8218553455743	50.4212255865956	47.8683947886434	74.9828236299232	27.1267868099404	86.7979141875774	15.831709400459	0	33.6014069462979	0	6.62797407331934	32.2296568899144	48.7273861766801	8.79618766523924	8.32458678771756	26.4566924036642	61.2423204902799	16.9454873517133	32.053655765399	13.7788613792854	5.33658353776832	44.3185762747339	27.1952459667173	29.348789001888	5.43700570995207	2.87226993756543	15.2714915748292
ENSG00000018610	0	2.1359811304587	16.4941445251919	21.3776784599137	31.3882957993918	32.9496748664687	19.2843590892744	30.8830006717898	70.3946982185932	48.5804209433305	44.6279395905472	57.5870776821427	17.8967149744319	81.5884303412792	60.6692069863712	0	9.94196110997901	19.3377941339486	22.1077955801604	0.748611716190574	16.6491735754351	28.6614167706362	61.2423204902799	38.1273465413549	30.4509729771291	28.4189015947762	2.66829176888416	43.1522979517146	55.9594484315144	7.57388103274529	1.35925142748802	25.8504294380889	0
ENSG00000018699	0	16.0198584784402	3.29882890503838	12.3332760345656	11.8766524646348	18.6714824243323	11.9109276727871	18.2776942751409	24.4034953824457	0	19.2512680586674	69.2714122843166	15.1433742091347	24.7679163536026	16.8007034731489	0	72.9077148065127	13.3215915144979	6.31651302290298	0.187152929047643	17.4059541925003	16.9028868134521	0.914064484929551	0	4.80804836480986	0.861178836205339	1.33414588444208	17.4941748452897	8.89075348911911	16.0944971945837	2.71850285497604	1.43613496878271	5.09049719160975
ENSG00000018869	0	0	0	9.04440242534809	0	0	0	0	0	0	0	0	0	0	7.46697932139953	0	0	0.429728758532192	7.21887202617484	0	0	0	0	0	0	16.3623978879014	0	1.16627832301931	9.41373898847906	0	0	0	0
ENSG00000019102	184.794641774882	553.066542708056	188.033247587187	148.410421615939	353.754576982335	180.124889270029	330.670039677852	276.686475406443	268.438449206902	125.675436788181	98.881513210428	28.376241176708	241.60565215483	370.790277175992	182.007620959114	16.4229764516668	649.541459185295	149.115879210671	334.775190213858	283.349534578132	413.958997534682	180.052489969381	370.196116396468	258.418682113628	381.438503608249	370.306899568296	125.409713137556	201.766149882341	297.57874913581	352.185468022656	89.7105942142092	40.211779125916	86.5384522573657
ENSG00000019144	0	0.3051401614941	0	0.411109201152186	5.93832623231738	1.09832249554896	0	0	9.85525775060305	0	1.75011527806067	0	0	0	0	49.2689293550003	0	7.73511765357946	0	0	1.51356123413046	0	3.6562579397182	5.64849578390443	6.41073115307981	0	0	1.16627832301931	5.22985499359948	0	84.2735885042571	0	0
ENSG00000019186	0	0	0	8.6332932241959	0	10.9832249554896	6.80624438444979	0	9.85525775060305	39.603604029889	3.50023055612135	0	3.44167595662151	0	6.53360690622459	0	3.31398703665967	22.7756242022062	0	0	1.51356123413046	0	24.6797410930979	0	3.20536557653991	17.2235767241068	0	10.4965049071738	0	1.89347025818632	2.71850285497604	0	5.09049719160975
ENSG00000019485	0	8.69649460258184	0	0.822218402304372	3.39332927560993	0	0	0.630265319832445	7.03946982185932	22.1780182567379	14.0009222244854	0	1.3766703826486	0	0.933372415174941	0	0	0	1.35353850490778	0.374305858095287	0	0.734908122324005	0.914064484929551	9.88486762183276	8.01341394134976	0	1.33414588444208	0	3.13791299615969	2.84020538727948	66.6033199469129	0	0
ENSG00000019549	0	0	3.29882890503838	0	2.54499695670745	15.3765149376854	0	0	11.7324497030989	0	5.25034583418202	0.834595328726706	2.75334076529721	0	17.7340758883239	0	0	27.9323693045925	0	0	0.756780617065232	0.734908122324005	0	0	0	8.61178836205339	0	5.83139161509657	0	0	0	1.43613496878271	0
ENSG00000019582	1111.04926597984	764.528674623467	366.17000845926	308.331900864139	229.04972610367	572.226020181007	653.39946090718	323.956374393877	605.394404679902	693.327094549924	350.898113251165	565.855632876707	454.30122627404	211.255757133669	605.758697448537	49.2689293550003	231.979092566177	250.531866224268	577.058582592351	318.534285239089	675.805091039252	348.346449981578	326.32102111985	649.57701514901	1075.40015092914	310.024381033922	324.197449919426	228.590551311786	319.544140108928	499.876148161189	339.812856872005	706.578404641096	269.796351155317
ENSG00000019991	0	0	0	0	0	0	4.53749625629986	0	0	0	0	30.8800271628881	0	8.74161753656563	10.2670965669244	0	0	0.429728758532192	0	0	1.51356123413046	0	0	0	0	1.72235767241068	0	0	0	0	0	0	0
ENSG00000019995	15.9699073138787	30.51401614941	188.033247587187	66.5996905866541	55.1416007286614	37.3429648486646	50.4796458513359	47.9001643072658	62.88593040861	0.528048053731854	60.3789770930932	0.834595328726706	50.9368041579984	85.959239109562	23.3343103793735	221.710182097501	9.94196110997901	24.4945392363349	45.1179501635927	188.837305409072	39.3525920873921	109.501310226277	42.0469663067593	38.1273465413549	57.6965803777183	39.6142264654456	156.095068479723	68.8104210581395	21.9653909731178	44.4965510673786	42.1367942521286	17.2336196253926	91.6289494489754
ENSG00000020129	2.28141533055409	0	0	0	7.63499087012234	0	0	1.26053063966489	7.50876780998328	0	0	0	0	5.09927689632995	3.73348966069977	0	0	2.57837255119315	9.47476953435447	0	0.756780617065232	0	23.7656766081683	0	0	12.9176825430801	0	1.16627832301931	0	17.9879674527701	0	1.43613496878271	0
ENSG00000020181	2.28141533055409	0	3.29882890503838	0	0.848332318902482	0	0	0	0	0	1.75011527806067	0	0	0.728468128047135	0	0	0	7.73511765357946	0	0	0.756780617065232	0	30.1641280026752	0	0	0.861178836205339	1.33414588444208	0	7.32179699103927	0	0	0	0
ENSG00000020256	0	10.8324757330405	0	15.2110404426309	14.4216494213422	6.58993497329375	19.2843590892744	9.45397979748668	9.3859597624791	90.296217188147	5.25034583418202	0	2.06500557397291	0	16.8007034731489	197.075717420001	0	21.0567091680774	0.451179501635927	31.6288450090517	30.2712246826093	12.4934380795081	0	15.5333634057372	11.2187795178897	26.6965439223655	6.6707294222104	10.4965049071738	2.09194199743979	2.84020538727948	2.71850285497604	5.74453987513086	5.09049719160975
ENSG00000020426	4.56283066110819	72.3182182741016	46.1836046705373	46.8664489313492	55.1416007286614	52.71947978635	64.659321652273	107.145104371516	25.8113893468175	47.5243248358668	86.6307062640033	85.9633188588507	41.9884466707824	80.1314940851849	69.0695587229457	0	86.1636629531514	37.3864019923007	21.6566160785245	62.5090783019129	19.676296043696	22.7821517920442	33.8203859423934	39.539470487331	32.053655765399	34.4471534482136	12.0073129599787	51.3162462128498	37.1319704545563	41.6563456800991	2.71850285497604	2.87226993756543	20.361988766439
ENSG00000020577	0	12.9684568634992	3.29882890503838	46.0442305290448	3.39332927560993	21.9664499109792	1.13437406407496	3.15132659916223	27.6885812993133	0	7.87551875127303	23.3686692043478	1.3766703826486	0	3.73348966069977	0	0	21.9161666851418	5.41415401963113	48.0983027652444	0.756780617065232	6.61417310091605	13.7109672739433	1.41212394597611	14.4241450944296	37.0306899568296	1.33414588444208	26.8244014294442	6.79881149167932	9.46735129093162	4.07775428246406	15.7974846566099	167.986407323122
ENSG00000020633	164.261903799895	164.165406883826	158.343787441842	47.6886673336536	49.203274496344	105.4389595727	96.421795446372	68.0686545419041	106.999941292262	29.5706910089838	199.513141698917	65.0984356406831	123.21199924705	56.8205139876766	125.071903633442	287.402087904169	165.699351832983	61.0214837115713	95.1988748451806	16.8437636142879	97.624699601415	91.1286071681766	4.57032242464775	49.4243381091638	173.089741133155	164.48515771522	88.0536283731773	48.9836895668112	134.407273335507	47.3367564546581	32.6220342597124	226.909325067669	142.533921365073
ENSG00000020922	246.392855699842	68.1988260939313	16.4941445251919	70.2996733970238	59.3832623231738	83.4725096617208	80.5405585493225	100.842451173191	67.5789102898495	23.2341143642016	49.8782854247292	121.016322665372	22.715061313702	134.76660368872	64.402696647071	16.4229764516668	16.5699351832983	76.9214477772624	108.734259894258	14.7850813947638	62.0560105993491	58.0577416635964	48.4454177012662	52.248586001116	72.1207254721479	51.6707301723204	53.3658353776832	1.16627832301931	89.953505889911	66.2714590365213	57.0885599544968	40.211779125916	178.167401706341
ENSG00000021300	0	0	0	6.16663801728279	0	1.09832249554896	0	10.7145104371516	0.469297988123955	27.4584987940564	0	0	0.688335191324302	0	3.73348966069977	0	0	0	0	0.187152929047643	0	0	0	0	1.60268278826995	20.6682920689281	2.66829176888416	9.33022658415451	0.522985499359948	5.68041077455897	2.71850285497604	0	0
ENSG00000021355	269.207009005383	293.697405438071	630.07632086233	382.331557071533	279.949665237819	496.441767988129	197.948274181081	187.819065310069	292.841944589348	378.082406472007	662.418632745965	404.778734432452	364.81765140188	123.111113639966	183.874365789463	1601.24020403751	251.863014786135	210.137362922242	164.229338595478	83.6573592842966	298.171563123702	541.627286152792	239.484895051542	293.721780763031	950.390893444082	251.464220171959	4682.8520543917	758.080909962554	181.475968277902	444.018775544693	713.60699943121	1556.77030616046	1817.30749740468
ENSG00000021574	0	29.5985956649277	79.171893720921	47.6886673336536	39.8716189884167	35.1463198575667	30.0609126979866	55.4633481452552	40.8289249667841	43.8279884597438	49.8782854247292	142.715801212267	19.9617205484048	20.3971075853198	60.6692069863712	24.6344646775002	0	22.345895443674	48.7273861766801	55.3972669981024	49.1907401092401	27.1916005259882	2.74219345478865	14.1212394597611	1.60268278826995	29.2800804309815	36.0219388799362	55.9813595049271	61.7122889244738	39.7628754219128	278.646542635044	112.018527565052	5.09049719160975
ENSG00000021645	0	0	0	0	0.848332318902482	0	5.10468328833734	18.2776942751409	0	0	0	0	0	0	0	123.172323387501	0	0	0	45.8524676166726	0	0	0	1.41212394597611	0	1.72235767241068	0	25.6581231064249	0	5.68041077455897	0	1.43613496878271	203.61988766439
ENSG00000021762	9.12566132221637	45.1607439011267	3.29882890503838	46.455339730197	26.298301885977	45.0312223175073	53.3155810115233	16.3868983156436	55.8464605867506	5.28048053731854	34.1272479221831	67.6022216268632	79.1585470022948	73.5752809327607	51.3354828346218	8.21148822583339	72.9077148065127	56.2944673677171	64.0674892323017	54.8358082109595	34.0551277679355	22.7821517920442	42.9610307916889	21.1818591896416	30.4509729771291	37.0306899568296	29.3512094577258	39.6534629826567	13.0746374839987	13.2542918073043	46.2145485345926	17.2336196253926	5.09049719160975
ENSG00000021776	107.226520536042	48.6698557583089	42.8847757654989	81.3996218281328	81.4399026146383	92.2590896261125	90.1827380939597	30.8830006717898	161.43850791464	168.975377194193	54.2535736198809	1.66919065745341	107.380289846591	78.6745578290906	106.404455329943	106.749346935834	23.1979092566177	94.9700556356144	100.161849363176	104.431334408585	163.46461328609	36.0104979938762	36.562579397182	28.2424789195222	48.0804836480986	62.0048762067844	33.353647111052	76.9743693192747	56.4824339308744	55.8573726164965	70.681074229377	14.3613496878271	106.900441023805
ENSG00000021826	4.56283066110819	0.15257008074705	6.59765781007675	0	1.69666463780496	0	0	17.017163635476	0	0	1.75011527806067	0	0	4.37080876828281	1.86674483034988	0	6.62797407331934	0	0	0.374305858095287	2.2703418511957	0.734908122324005	0	0	0	0	1.33414588444208	0	0	0.946735129093162	1.35925142748802	0	0
ENSG00000022267	0	0	3.29882890503838	0	0	0	3.97030922426238	0	4.22368189311559	0	0	0.834595328726706	0	0.728468128047135	0	0	0	0.429728758532192	0	0.187152929047643	18.9195154266308	0	0.914064484929551	7.06061972988054	0	0	0	9.33022658415451	2.09194199743979	0	2.71850285497604	0	5.09049719160975
ENSG00000022277	111.789351197151	86.2020956220831	405.75595531972	144.299329604417	111.979866095128	144.978569412462	58.9874513318982	76.2621036997259	106.061345316014	26.9304507403245	178.511758362189	125.189299309006	138.355373456185	108.541751079023	48.5353655890969	279.190599678335	33.1398703665967	60.1620261945069	46.0203091668646	64.3806075923893	121.084898730437	247.66403722319	69.4689008546459	129.915403029802	139.433402579486	99.8967449998194	521.651040816853	212.262654789515	75.3099119078325	211.121933787775	207.965468405667	562.964907762824	244.343865197268
ENSG00000022355	18.2513226444327	0.457710242241149	0	0	6.78665855121986	0	1.70156109611245	0	4.22368189311559	0	0	0	0.688335191324302	0.728468128047135	4.66686207587471	0	0	0	0.451179501635927	0	0	0	0	0	1.60268278826995	0	4.00243765332624	0	0	1.89347025818632	0	15.7974846566099	0
ENSG00000022556	0	0	0	0	0.848332318902482	4.39328998219583	0	0	0	0	7.87551875127303	0	0	0	7.46697932139953	0	0	0.859457517064384	0	0	0	0	0	0	8.01341394134976	0	0	0	1.56895649807984	0	0	0	0
ENSG00000022567	13.6884919833246	34.6334083295803	72.5742359108443	58.3775065636104	68.7149178311011	41.7362548308604	45.3749625629986	52.3120215460929	46.9297988123955	153.133935582238	20.1263256976977	82.6249375439439	26.8450724616478	14.5693625609427	46.6686207587471	0	175.641312942962	24.9242679948671	90.6870798288214	68.1236661733422	34.0551277679355	110.236218348601	128.883092375067	38.1273465413549	38.4643869184789	21.5294709051335	130.746296675324	6.99766993811588	34.5170429577566	40.709610551006	220.198731253059	198.186625692015	157.805412939902
ENSG00000022840	508.755618713563	263.641099530902	544.306769331332	279.143147582334	247.713037119525	287.760493833827	219.501381398506	148.742615480457	216.815670513267	334.254418012263	199.513141698917	206.979641524223	176.902144170346	236.752141615319	154.93982091904	336.671017259169	566.691783268804	280.183150562989	286.047804037178	157.20846040002	480.555691836423	316.745400721646	241.313024021401	240.061070815938	250.018514970113	223.906497413388	675.077817527693	239.087056218959	245.803184699175	266.979306404272	214.761725543107	680.727975203007	916.289494489754
ENSG00000022976	59.3167985944064	8.08621427959364	0	51.7997593451754	26.298301885977	9.88490245994062	13.0453017368621	37.1856538701143	42.7061169192799	99.2730341015885	18.3762104196371	76.782770242857	33.7284243748908	18.2117032011784	1.86674483034988	0	6.62797407331934	35.2377581996397	20.3030775736167	89.2719471557259	72.6509392382623	0	14.6250317588728	22.5939831356177	19.2321934592394	65.4495915516058	17.343896497747	8.1639482611352	23.5343474711977	0.946735129093162	5.43700570995207	22.9781595005234	20.361988766439
ENSG00000023041	25.095568636095	77.5056010195013	16.4941445251919	42.3442477186751	44.9616129018316	26.359739893175	25.5234164416867	35.2948579106169	67.1096123017256	20.5938740955423	28.8769020880011	7.51135795854036	41.9884466707824	48.8073645791581	23.3343103793735	0	79.5356888798321	10.7432189633048	48.2762066750442	0.187152929047643	21.9466378948917	77.1653528440205	13.7109672739433	35.3030986494027	41.6697524950188	37.8918687930349	36.0219388799362	41.9860196286953	30.333158962877	37.8694051637265	4.07775428246406	12.9252147190444	5.09049719160975
ENSG00000023171	2.28141533055409	0	3.29882890503838	20.1443508564571	8.48332318902482	41.7362548308604	17.582797993162	40.3369804692765	22.9956014180738	0.528048053731854	13.125864585455	0	0	0	10.2670965669244	41.0574411291669	33.1398703665967	12.4621339974336	18.498359567073	0.748611716190574	10.5949286389133	12.4934380795081	19.1953541835206	28.2424789195222	33.656338553669	14.6400402154908	1.33414588444208	3.49883496905794	39.2239124519961	30.2955241309812	1.35925142748802	15.7974846566099	0
ENSG00000023191	86.6937825610556	69.2668166591606	13.1953156201535	46.8664489313492	67.8665855121986	54.9161247774479	47.076523659111	69.9594505014014	90.5745117079233	90.296217188147	70.0046111224269	32.5492178203415	73.6518654717003	41.5226832986867	65.3360690622459	16.4229764516668	218.723144419538	56.7241961262493	85.7241053108262	67.187901528104	127.139143666959	40.4199467278203	112.429931646335	53.6607099470921	43.2724352832887	112.814427542899	45.3609600710307	47.8174112437919	59.0973614276741	17.9879674527701	99.2253542066254	17.2336196253926	25.4524859580487
ENSG00000023228	57.0353832638523	136.092512026368	72.5742359108443	130.732725966395	83.1365672524433	93.3574121216614	91.8842991900721	135.507043763976	82.5964459098161	215.971653976328	92.7561097372157	86.7979141875774	69.5218543237545	148.607498121616	144.672724352116	0	13.2559481466387	91.1024968088247	92.942977337001	65.8778310247705	48.4339594921749	2.20472436697202	95.0627064326733	96.0244283263754	113.790477967167	70.6166645688378	65.3731483376619	50.1499678898305	101.45918687583	101.300658812968	12.2332628473922	45.9563190010469	76.3574578741462
ENSG00000023287	225.860117724855	246.095540244991	385.96298188949	379.86490186462	186.633110158546	264.695721427299	197.948274181081	303.787884159239	359.482258902949	273.5288918331	278.268329211647	129.362275952639	389.597718289555	179.931627627642	154.006448503865	295.613576130002	354.596612922585	207.129261612517	150.6939535464	157.769919187163	152.112904030112	307.926503253758	205.664509109149	314.903639952672	270.853391217622	330.69267310285	725.775361136492	418.693917963934	202.3953882523	225.322960724172	142.721399886242	337.491717663938	234.162870814048
ENSG00000023318	139.1663351638	113.359569995058	59.3789202906908	54.2664145520885	106.04153986281	75.7842521928781	82.8093066774724	70.5897158212339	117.324497030989	80.7913522209736	51.6284007027899	209.483427510403	126.653675203672	26.953320737744	75.6031656291702	16.4229764516668	162.385364796324	93.2511406014856	92.0406183337292	32.003150867147	115.787434410981	83.0446178226126	74.9532877642232	66.3698254608771	67.312677107338	68.8943068964272	148.090193173071	50.1499678898305	76.3558829065524	63.4312536492418	85.6328399317452	70.370613470353	30.5429831496585
ENSG00000023330	75.2867059082851	24.411212919528	29.6894601453454	30.0109716841096	41.5682836262216	49.4245122997031	25.5234164416867	3.78159191899467	27.6885812993133	89.2401210806833	9.6256340293337	0	70.8985247064031	23.3109800975083	22.4009379641986	0	92.7916370264708	55.0052810921206	65.4210277372094	28.6343981442894	39.3525920873921	0.734908122324005	56.6719980656322	28.2424789195222	35.259021341939	14.6400402154908	29.3512094577258	8.1639482611352	36.6089849551963	9.46735129093162	1.35925142748802	47.3924539698296	5.09049719160975
ENSG00000023445	27.3769839666491	182.626386654219	125.355498391458	94.1440070638506	49.203274496344	110.930572050445	40.8374663066987	125.422798646657	94.7981936010389	65.4779586627499	73.5048416785483	70.1060076130433	91.5485804461322	32.7810657621211	70.0029311381206	164.229764516668	33.1398703665967	54.5755523335884	88.4311823206417	24.8913395633366	121.084898730437	143.307083853181	89.578319523096	121.442659353945	174.692423921425	71.4778434050432	384.234014719319	88.6371525494679	63.2812454225537	111.714745232993	202.528462695715	96.2210429084419	503.959221969365
ENSG00000023516	104.945105205488	60.4177519758317	138.550814011612	51.7997593451754	76.3499087012234	30.7530298753708	46.5093366270736	118.4898801285	103.24555738727	199.074116256909	39.3775937563651	63.4292449832297	85.3535637242135	212.712693389764	66.2694414774208	8.21148822583339	16.5699351832983	34.8080294411075	55.946258202855	41.5479502485768	28.7576634484788	49.9737523180323	74.9532877642232	50.8364620551399	44.8751180715587	49.9483724999097	49.363397724357	16.3278965222704	72.1719989116728	84.2594264892914	5.43700570995207	60.317668688874	25.4524859580487
ENSG00000023572	54.7539679332982	12.205606459764	0	16.4443680460874	25.4499695670745	23.0647724065281	30.0609126979866	13.8658370363138	18.7719195249582	0.528048053731854	28.8769020880011	15.8573112458074	12.3900334438374	0	5.60023449104965	0	0	18.0486078583521	5.86533352126705	0.187152929047643	9.08136740478279	16.9028868134521	0	5.64849578390443	12.8214623061596	12.9176825430801	0	31.4895147215215	12.0286664852788	17.9879674527701	66.6033199469129	0	183.257898897951
ENSG00000023608	0	9.00163476407594	0	78.1107482189153	20.3599756536596	43.9328998219583	32.3296608261365	68.6989198617365	14.5482376318426	0.528048053731854	12.2508069464247	16.6919065745341	9.63669267854023	0.728468128047135	31.734662115948	0	6.62797407331934	35.6674869581719	16.6936415605293	106.677169557157	42.379714555653	63.2020985198644	25.5938055780274	40.9515944333071	84.9421877783075	25.8353650861602	32.0195012266099	51.3162462128498	29.810173463517	23.668378227329	4.07775428246406	100.52944781479	269.796351155317
ENSG00000023697	102.663689874934	29.7511657456747	3.29882890503838	13.5666036380221	83.9848995713457	32.9496748664687	36.8671570824363	20.7987555544707	33.3201571568008	87.6559769194877	21.8764409757584	121.016322665372	56.4434856885928	37.1518745304039	24.2676827945485	0	0	31.37019937285	39.2526166423257	0.187152929047643	28.0008828314136	29.3963248929602	50.2735466711253	16.9454873517133	62.5046287425282	66.3107703878111	38.6902306488203	10.4965049071738	58.0513904289542	31.2422592600743	4.07775428246406	7.18067484391357	0
ENSG00000023734	100.38227454438	170.573350275202	19.7929734302303	120.45499593759	158.638143634764	151.568504385756	141.229570977333	119.750410768165	133.280628627203	143.629070615064	154.010144469339	186.114758306055	179.655484935643	86.6877072376091	121.338413972742	98.5378587100006	212.095170346219	146.537506659477	166.936415605293	188.275846621929	90.8136740478279	105.091861492333	166.359736257178	132.739650921754	102.571698449277	185.153449784148	121.407275484229	120.126667270989	134.407273335507	111.714745232993	530.108056720327	113.454662533834	10.1809943832195
ENSG00000023892	0	13.2735970249933	32.9882890503838	27.9554256783486	30.5399634804894	4.39328998219583	5.67187032037482	14.4961023561462	0	55.9730936955765	28.0018444489708	0	14.4550390178103	13.1124263048484	9.33372415174941	0	3.31398703665967	17.6188790998199	4.06061551472335	0.187152929047643	25.7305409802179	36.0104979938762	1.8281289698591	22.5939831356177	32.053655765399	12.0565037068748	66.707294222104	15.1616181992511	3.13791299615969	35.029199776447	0	68.9344785015703	157.805412939902
ENSG00000023902	79.8495365693933	24.8689231617691	118.757840581382	74.8218746096978	44.9616129018316	101.045669590504	22.1202942494618	29.6224700321249	33.7894551449248	36.4353157074979	85.755648624973	255.386170590372	43.365117053431	2.18540438414141	14.0005862276241	525.535246453337	9.94196110997901	51.1377222653308	0.902359003271854	0.374305858095287	59.7856687481534	227.086609798118	43.8750952766184	100.260800164304	145.844133732566	36.1695111206243	298.848678115026	59.480194473985	30.8561444622369	48.2834915837512	201.169211268227	539.986748262301	534.502205119023
ENSG00000023909	232.704363716518	192.696011983524	145.148471821689	272.154291162747	175.604790012814	286.662171338278	382.851246625301	356.099905705331	288.148964708108	532.80048621544	203.013372255038	363.048967996117	266.385719042505	377.346490328416	294.012310780107	98.5378587100006	285.002885152732	293.934470836019	412.378064495237	291.584263456228	132.436607986416	173.438316868465	407.67276027858	240.061070815938	197.129982957204	248.019504827138	165.434089670818	226.257994665747	242.665271703016	291.594419760694	38.0590399696645	247.015214630627	76.3574578741462
ENSG00000024048	159.699073138787	88.3380767525418	131.953156201535	150.4659676217	114.524863051835	81.2758646706229	39.1359052105863	114.708288209505	45.0526068598997	80.2633041672418	64.7542652882449	126.858489966459	66.7685135584573	101.985537926599	63.469324231896	295.613576130002	0	78.2106340528589	94.7476953435447	102.559805118109	51.4610819604358	122.729656428109	55.7579335807026	91.788056488447	96.1609672961972	44.7812994826776	310.855991075005	233.255664603863	78.9708104033521	97.5137182965956	65.2440685194249	178.080736129057	458.144747244877
ENSG00000024422	29.6583992972032	0	0	5.34441961497842	10.1799878268298	0	0	0	10.793853726851	0	6.12540347321236	0	0	0	0.933372415174941	0	3.31398703665967	3.86755882678973	0	0	14.3788317242394	0	24.6797410930979	0	1.60268278826995	0	0	1.16627832301931	6.27582599231937	0	0	8.61680981269629	0
ENSG00000024526	6.84424599166228	4.11939218017034	3.29882890503838	0	2.54499695670745	3.29496748664687	1.70156109611245	0.630265319832445	0.469297988123955	0	0	0	0	0	0	0	0	0.859457517064384	0	0.187152929047643	30.2712246826093	0	0	0	0	16.3623978879014	0	0	1.0459709987199	0.946735129093162	1.35925142748802	0	0
ENSG00000024862	66.1610445860687	48.8224258390559	112.160182771305	124.566087949112	98.406548992688	54.9161247774479	120.810837823984	107.145104371516	50.2148847292632	59.1413820179676	33.2521902831528	118.512536679192	33.7284243748908	152.978306889898	78.4032828746951	0	109.361572209769	41.2539608190904	85.2729258091902	26.9500217828607	71.1373780041318	47.0341198287363	22.8516121232388	103.085048056256	56.0938975894483	68.0331280602218	54.6999812621253	58.3139161509657	58.0513904289542	96.5669831675025	137.28439417629	146.485766815837	137.443424173463
ENSG00000025039	20.5327379749868	41.0413517209564	105.562524961228	90.4440242534809	99.2548813115904	90.0624446350145	102.093665766747	76.2621036997259	61.9473344323621	61.7816222866269	117.257723630065	142.715801212267	51.6251393493227	84.5023028534677	98.0041035933688	0	86.1636629531514	43.4026046117514	56.8486172061268	15.1593872528591	90.8136740478279	80.8398934556405	36.562579397182	128.503279083826	136.228037002946	107.647354525667	54.6999812621253	74.6418126732361	68.5111004161532	87.0996318765709	36.6997885421765	15.7974846566099	45.8144747244877
ENSG00000025156	77.5681212388392	75.8273301312837	42.8847757654989	66.1885813855019	28.8432988426844	72.4892847062312	133.288952528808	118.4898801285	51.622778693635	135.180301755355	24.5016138928494	89.3017001737576	82.6002229589163	71.3898765486193	66.2694414774208	49.2689293550003	9.94196110997901	112.159205976902	32.0337446161508	108.548698847633	81.7323066430451	80.1049853333165	78.6095457039414	53.6607099470921	22.4375590357793	63.7272338791951	29.3512094577258	47.8174112437919	65.8961729193534	53.9639023583102	235.150496955427	84.7319631581802	35.6334803412682
ENSG00000025293	0	91.999758690471	155.044958536804	72.3552194027847	94.1648873981755	52.71947978635	51.6140199154109	90.7582060558721	35.6666470974206	100.857178262784	48.1281701466685	53.4141010385092	61.9501672191872	40.7942151706396	55.0689724953215	82.1148822583339	152.443403686345	65.7485000554254	60.0068737175783	43.7937853971486	34.0551277679355	117.585299571841	43.8750952766184	63.5455775689249	118.598526331977	102.480281508435	132.080442559766	95.6348224875838	32.4251009603168	65.3247239074282	6.79625713744009	124.943742284096	580.316679843511
ENSG00000025434	0	7.93364419884659	0	0.411109201152186	0.848332318902482	12.0815474510385	2.83593516018741	2.52106127932978	7.50876780998328	0	4.37528819515168	0	0	0	8.40035173657447	0	23.1979092566177	11.6026764803692	7.21887202617484	18.1538341176214	11.3517092559785	0	0	22.5939831356177	8.01341394134976	10.3341460344641	6.6707294222104	0	13.5976229833586	15.1477620654906	1.35925142748802	2.87226993756543	5.09049719160975
ENSG00000025708	264.644178344275	146.009567274927	702.650556773174	332.587343732118	180.694783926229	449.213900679524	103.228039830822	115.338553529337	127.179754781592	106.665706853834	210.888891006311	378.906279241925	124.588669629699	99.0716654144104	101.737593254069	960.744122422506	3.31398703665967	69.6160588822151	88.4311823206417	37.4305858095287	168.762077605547	438.005240905107	266.906829599429	245.709566599843	399.068014279218	95.5908508187927	1311.46540440657	522.492688712653	82.1087233995118	258.458690242433	709.529245148746	881.786870832587	855.203528190437
ENSG00000025770	25.095568636095	14.6467277517168	13.1953156201535	46.455339730197	33.0849604371968	20.8681274154302	35.1655959863239	17.017163635476	55.8464605867506	43.8279884597438	36.7524208392741	73.4443889279501	38.5467707141609	37.1518745304039	39.2016414373475	0	185.583274052942	33.9485719240432	58.6533352126705	37.6177387385763	41.6229339385878	60.2624660305684	48.4454177012662	26.8303549735461	51.2858492246385	24.1130074137495	30.6853553421678	32.6557930445408	20.396434475038	52.0704321001239	4.07775428246406	51.7008588761777	111.990938215414
ENSG00000025772	82.1309518999474	67.8936859324372	32.9882890503838	111.410593512242	26.298301885977	73.5876072017802	139.528009881221	116.599084169002	42.7061169192799	95.0486496717337	53.3785159808505	174.430423703882	72.963530280376	79.4030259571378	58.8024621560213	8.21148822583339	185.583274052942	77.7809052943267	95.1988748451806	317.598520593851	94.597577133154	31.6010492599322	132.539350314785	97.4365522723515	17.6295106709695	58.5601608619631	8.00487530665248	58.3139161509657	50.206607938555	50.1769618419376	13.5925142748802	8.61680981269629	10.1809943832195
ENSG00000025796	358.182206896993	175.608162939854	171.539103061996	141.832674397504	177.301454650619	191.108114225519	228.576373911105	208.617820864539	183.96481134459	329.501985528677	142.634395161945	110.166583391925	179.655484935643	201.785671469056	211.875538244712	16.4229764516668	149.129416649685	240.218376019495	297.327291578076	200.627939939074	121.841679347502	38.2152223608483	212.977024988585	190.636732706775	203.540714110284	283.327837111557	140.085317866418	129.456893855144	162.648490300944	187.453555560446	24.4665256947843	48.8285889386123	234.162870814048
ENSG00000025800	212.171625741531	111.986439268335	184.734418682149	203.08794536918	138.278167981105	192.206436721068	204.754518565531	182.146677431577	257.644595480051	78.1511119523143	175.011527806067	152.730945156987	213.383909310534	159.534520042323	153.07307608869	303.825064355835	172.327325906303	115.59703604516	201.677237231259	453.845852940535	112.003531325654	104.356953370009	165.445671772249	159.5700058953	125.009257485056	126.593288922185	94.7243577953877	111.962719009854	237.435416709416	213.015404045961	148.158405596194	70.370613470353	86.5384522573657
ENSG00000026025	191.638887766544	83.4558341686362	310.089917073607	83.4551678338937	42.4166159451241	166.945019323442	15.8812368970495	11.344775756984	112.162219161625	1.58414416119556	55.1286312589112	152.730945156987	76.4052062369976	81.5884303412792	71.8696759684705	328.459529033335	29.825883329937	74.7728039846014	34.2896421243305	1.87152929047643	84.759429111306	163.884511278253	24.6797410930979	117.206287516017	158.665596038725	116.259142887721	573.682730310095	134.122007147221	60.143332426394	106.981069587527	10.8740114199041	284.354723818977	295.248837113365
ENSG00000026103	0	0	16.4941445251919	13.1554944368699	0.848332318902482	26.359739893175	0	1.26053063966489	0	72.3425833612639	8.75057639030337	2.50378598618012	0	0	12.1338413972742	41.0574411291669	0	8.59457517064384	8.12123102944669	0	5.29746431945663	3.67454061162003	21.0234831533797	11.2969915678089	20.8348762475094	6.88943068964271	154.760922595281	30.3232363985022	5.75284049295943	25.5618484855154	5.43700570995207	63.1899386264394	0
ENSG00000026297	221.297287063747	137.160502591598	95.6660382461129	105.24395549496	68.7149178311011	171.338309305637	48.7780847552235	69.329185181569	77.4341680404526	13.7292493970282	54.2535736198809	328.830559518322	67.4568487497816	48.0788964511109	71.8696759684705	344.882505485002	56.3377796232144	70.4755163992795	117.306670425341	170.122012504308	75.6780617065232	349.816266226226	62.1563849752095	155.333634057372	144.241450944296	96.452029654998	668.407088105482	143.452233731376	107.212027368789	90.8865723929435	400.979171108965	1098.64325111878	249.434362388878
ENSG00000026508	219.015871733193	170.420780194455	517.916138091025	191.987996938071	437.739476553681	259.204108949554	130.453017368621	107.775369691348	346.811213223603	109.305947122494	677.294612609481	153.565540485714	168.642121874454	195.229458316632	180.140876128764	312.036552581669	152.443403686345	235.921088434173	69.0304637502969	215.600174262885	199.790082905221	413.018364746091	202.008251169431	224.527707410201	445.545815139047	303.996129180485	1400.85317866418	457.181102623571	187.228808770861	191.240496076819	466.22323962839	1005.2944781479	1257.35280632761
ENSG00000026559	2.28141533055409	0	0	0	0	12.0815474510385	9.6421795446372	0	0	0	2.62517291709101	0	0	10.1985537926599	0	0	3.31398703665967	4.29728758532192	0.451179501635927	0.187152929047643	0	0	0	0	0	0	9.33902119109456	0	0	0	0	0	5.09049719160975
ENSG00000026652	0	0	0	1.64443680460874	10.1799878268298	25.261417397626	19.2843590892744	3.78159191899467	0	0	27.1267868099404	0	4.81834633927012	0	12.1338413972742	0	0	7.30538889504726	21.2054365768886	0.56145878714293	6.81102555358709	0	13.7109672739433	0	1.60268278826995	0	4.00243765332624	4.66511329207726	2.61492749679974	8.52061616183845	4.07775428246406	5.74453987513086	0
ENSG00000026751	0	0.15257008074705	56.0800913856524	26.3109888737399	21.2083079725621	35.1463198575667	17.582797993162	1.89079595949734	8.91666177435514	0	19.2512680586674	0	20.6500557397291	19.6686394572727	5.60023449104965	0	0	18.0486078583521	19.4007185703449	0.187152929047643	12.1084898730437	41.8897629724683	37.4766438821116	11.2969915678089	160.268278826995	0.861178836205339	33.353647111052	4.66511329207726	7.84478249039922	6.62714590365213	25.8257771222724	57.4453987513086	40.723977532878
ENSG00000026950	63.8796292555146	18.1558396088989	19.7929734302303	20.9665692587615	28.8432988426844	40.6379323353114	64.0921346202355	3.15132659916223	29.0964752636852	4.75243248358668	5.25034583418202	24.2032645330745	4.81834633927012	53.906641475488	17.7340758883239	8.21148822583339	0	12.4621339974336	13.0842055474419	82.3472887809631	22.703418511957	31.6010492599322	0.914064484929551	39.539470487331	25.6429246123192	21.5294709051335	92.0560660265036	51.3162462128498	17.2585214788783	49.2302267128444	1.35925142748802	84.7319631581802	427.601764095219
ENSG00000027001	22.8141533055409	11.1376158945346	6.59765781007675	40.6998109140664	31.3882957993918	31.8513523709198	47.6437106911485	50.4212255865956	5.63157585748746	62.3096703403587	14.8759798635157	43.3989570937887	9.63669267854023	1.45693625609427	56.9357173256714	8.21148822583339	33.1398703665967	14.6107777900945	83.4682078026465	60.6375490114365	34.8119083850007	4.40944873394403	32.9063214574638	24.0061070815938	4.80804836480986	37.8918687930349	0	23.3255664603863	27.7182314660772	16.0944971945837	1.35925142748802	2.87226993756543	10.1809943832195
ENSG00000027075	57.0353832638523	18.7661199318871	52.781262480614	19.3221324541527	33.9332927560993	9.88490245994062	13.6124887688996	20.1684902346382	13.1403436674707	71.8145353075321	10.500691668364	41.7297664363353	21.3383909310534	0	24.2676827945485	24.6344646775002	13.2559481466387	26.2134542704637	7.67005152781076	0	7.56780617065232	24.9868761590162	2.74219345478865	29.6546028654983	17.6295106709695	25.8353650861602	73.3780236443144	16.3278965222704	32.4251009603168	8.52061616183845	0	47.3924539698296	10.1809943832195
ENSG00000027697	88.9751978916096	129.379428473498	6.59765781007675	113.055030316851	54.2932684097589	73.5876072017802	69.7640049406103	56.0936134650876	66.6403143136016	79.207208059778	56.8787465369719	195.295306922049	145.238725369428	133.309667432626	71.8696759684705	385.939946614169	225.351118492858	35.2377581996397	38.3502576390538	21.8968926985743	102.165383303806	137.427818874589	95.0627064326733	121.442659353945	137.830719791216	66.3107703878111	939.238702647225	124.791780563067	76.3558829065524	49.2302267128444	207.965468405667	363.342147102027	437.782758478438
ENSG00000027847	36.5026452888655	25.7843436462514	52.781262480614	24.6665520691312	11.0283201457323	61.5060597507416	54.4499550755983	42.8580417486063	62.88593040861	29.5706910089838	31.5020750050921	134.369847925	33.7284243748908	1.45693625609427	108.271200160293	0	3.31398703665967	62.3106699871678	58.2021557110346	125.766768320016	29.5144440655441	58.7926497859204	24.6797410930979	50.8364620551399	41.6697524950188	44.7812994826776	12.0073129599787	25.6581231064249	49.683622439195	71.9518698110803	88.3513427867212	30.158834344437	25.4524859580487
ENSG00000027869	0	0	0	0	2.54499695670745	5.49161247774479	0	0.630265319832445	0	0	1.75011527806067	0	8.26002229589163	0	0.933372415174941	0	0	1.28918627559658	0	0	0.756780617065232	0.734908122324005	23.7656766081683	0	25.6429246123192	14.6400402154908	0	0	0.522985499359948	0	0	0	0
ENSG00000028116	182.513226444327	63.1640134292786	138.550814011612	92.4995702592418	62.7765915987837	52.71947978635	75.4358752609851	82.5647568980503	52.092076681759	102.969370477711	80.505302790791	31.7146224916148	28.9100780356207	119.46877299973	90.5371242719693	8.21148822583339	0	40.394503302026	51.8856426881316	68.8722778895328	80.2187454089146	52.1784766850044	69.4689008546459	57.8970817850204	52.8885320129084	109.369712198078	38.6902306488203	47.8174112437919	50.7295934379149	69.1116644238008	66.6033199469129	122.071472346531	234.162870814048
ENSG00000028137	269.207009005383	111.376158945346	1444.88706040681	606.797180900626	178.998119288424	444.820610697328	34.0312219222489	23.9500821536329	107.93853726851	123.035196519522	285.26879032389	588.389706752328	86.0418989155378	21.1255757133669	56.9357173256714	2537.34986178252	387.736483289181	45.9809771629445	66.3233867404813	15.9079989690497	177.086664393264	911.286071681766	39.3047728519707	410.928068279048	1190.79331168457	94.7296719825873	4782.91299572486	1089.30395370004	50.7295934379149	311.47585747165	1265.46307899135	4009.68883284134	5187.21663825033
ENSG00000028203	6.84424599166228	70.9450875473782	0	20.9665692587615	55.1416007286614	70.2926397151333	66.3608827483854	68.0686545419041	48.3376927767674	230.228951427088	115.507608352004	2.50378598618012	56.4434856885928	32.7810657621211	76.5365380443452	0	9.94196110997901	58.4431111603781	29.3266676063353	11.4163286719062	55.244985045762	18.3727030581001	42.0469663067593	66.3698254608771	121.803891908516	64.5884127154005	48.0292518399149	37.3209063366181	86.2926073943914	61.5377833910555	61.1663142369608	24.4142944693061	15.2714915748292
ENSG00000028277	57.0353832638523	0.457710242241149	155.044958536804	29.5998624829574	33.9332927560993	42.8345773264094	9.6421795446372	11.9750410768165	18.3026215368342	1.58414416119556	37.6274784783045	22.5340738756211	13.0783686351617	0.728468128047135	32.6680345311229	180.652740968335	165.699351832983	45.5512484044123	10.3771285376263	22.4583514857172	59.7856687481534	30.1312330152842	11.8828383040842	2.82424789195222	56.0938975894483	16.3623978879014	134.74873432865	79.3069259653134	13.0746374839987	35.029199776447	198.450708413251	93.3487729708764	468.325741628097
ENSG00000028310	59.3167985944064	92.6100390134592	122.05666948642	76.0552022131544	103.496542906103	73.5876072017802	71.4655660367228	46.0093683477685	66.1710163254777	115.114475713544	76.1300145956393	50.9103150523291	71.5868598977274	13.8408944328956	54.1356000801466	0	16.5699351832983	89.3835817746959	52.3368221897676	116.596274796682	64.3263524505447	121.259840183461	31.9922569725343	53.6607099470921	68.915359895608	55.9766243533471	41.3585224177045	113.128997332873	48.1146659411152	94.6735129093162	69.3218228018889	114.890797502617	35.6334803412682
ENSG00000028528	193.920303097098	152.875220908544	65.9765781007675	83.0440586327416	149.306488126837	79.079219679525	142.931132073446	122.271472047494	113.570113125997	211.747269546473	74.3798993175786	97.6476534610246	176.902144170346	98.3431972863633	99.8708484237187	49.2689293550003	86.1636629531514	157.280725622782	118.209029428613	33.3132213704805	157.410368349568	69.0813634984565	114.258060616194	120.030535407969	97.7636500844671	184.292270947943	92.0560660265036	86.3045959034292	115.579795358548	77.6322805856393	9.51475999241613	199.622760660797	111.990938215414
ENSG00000028839	27.3769839666491	13.7313072672345	0	2.8777644080653	5.08999391341489	5.49161247774479	8.50780548056223	1.26053063966489	22.0570054418259	19.0097299343467	10.500691668364	0	20.6500557397291	14.5693625609427	13.0672138124492	0	3.31398703665967	9.02430392917603	0	0	28.7576634484788	0	0	11.2969915678089	12.8214623061596	24.1130074137495	8.00487530665248	0	7.32179699103927	7.57388103274529	0	31.5949693132197	5.09049719160975
ENSG00000029153	54.7539679332982	9.45934500631709	56.0800913856524	47.6886673336536	50.8999391341489	25.261417397626	26.0906034737242	43.4883070684387	44.5833088717757	0.528048053731854	72.6297840395179	117.677941350466	59.19682645389	45.1650239389224	47.601993173922	180.652740968335	99.4196110997901	33.9485719240432	33.8384626226945	79.5399948452484	45.4068370239139	81.5748015779646	31.9922569725343	53.6607099470921	59.2992631659883	29.2800804309815	60.0365647998936	127.124337209105	31.3791299615969	72.8986049401734	2.71850285497604	10.052944781479	10.1809943832195
ENSG00000029363	177.950395783219	246.248110325738	250.710996782917	283.665348795008	126.40151551647	190.00979172997	171.857670707357	354.839375065667	211.653392643904	236.56552807187	211.763948645341	378.071683913198	189.292177614183	220.725842798282	270.678000400733	131.383811613334	308.200794409349	165.445572034894	174.155287631468	222.711985566696	199.790082905221	175.643041235437	147.164382073658	217.467087680321	240.402418240493	246.297147154727	593.694918576726	178.440583421955	207.625243245899	185.56008530226	103.303108489089	224.037055130103	106.900441023805
ENSG00000029364	6.84424599166228	134.871951380392	32.9882890503838	90.8551334546331	102.6482105872	61.5060597507416	86.7796159017348	105.254308412018	156.276230045277	151.02174336731	57.7538041760022	47.5719337374223	149.368736517374	27.6817888657911	91.4704966871442	8.21148822583339	56.3377796232144	36.9566732337685	101.96656736972	73.7382540447715	92.3272352819584	73.4908122324005	85.0079970984482	55.0728338930682	46.4778008598286	107.647354525667	81.3828989509669	50.1499678898305	163.694461299664	57.7508428746829	2.71850285497604	68.9344785015703	15.2714915748292
ENSG00000029534	2.28141533055409	5.95023314913494	13.1953156201535	2.8777644080653	11.0283201457323	0	9.6421795446372	5.04212255865956	0.469297988123955	0	9.6256340293337	32.5492178203415	2.06500557397291	0	10.2670965669244	0	0	8.16484641211165	11.2794875408982	40.7993385323863	15.8923929583699	9.55380559021206	0	11.2969915678089	1.60268278826995	7.75060952584805	0	6.99766993811588	6.27582599231937	11.3608215491179	0	11.4890797502617	122.171932598634
ENSG00000029639	0	0	3.29882890503838	4.11109201152186	14.4216494213422	10.9832249554896	4.53749625629986	30.8830006717898	0	47.5243248358668	19.2512680586674	0	8.94835748721593	0	8.40035173657447	98.5378587100006	0	1.28918627559658	5.86533352126705	23.7684219890507	5.29746431945663	0	9.14064484929551	0	1.60268278826995	18.9459343965175	16.009750613305	3.49883496905794	10.459709987199	6.62714590365213	0	0	0
ENSG00000029725	29.6583992972032	28.0728948574572	69.2754070058059	83.8662770350459	33.9332927560993	45.0312223175073	71.4655660367228	65.5475932625743	38.0131370380403	45.4121326209394	50.7533430637595	19.1956925607142	42.6767818621067	92.5154522619862	60.6692069863712	0	3.31398703665967	67.4674150895541	67.2257457437532	56.707337501436	34.8119083850007	51.4435685626804	86.8361260683073	101.67292411028	52.8885320129084	55.1154455171417	80.0487530665248	76.9743693192747	54.9134774327945	47.3367564546581	2.71850285497604	34.4672392507851	290.158339921756
ENSG00000029993	54.7539679332982	47.9070053545736	131.953156201535	18.0888048506962	23.7533049292695	56.0144472729969	64.659321652273	113.44775756984	65.7017183373537	17.4255857731512	103.25680140558	46.7373384086955	57.8201560712414	48.8073645791581	45.7352483435721	24.6344646775002	96.1056240631304	49.8485359897343	58.6533352126705	86.8389590781065	73.4077198553275	24.9868761590162	70.3829653395754	64.957701514901	125.009257485056	105.063818017051	24.0146259199574	45.4848545977533	71.1260279129529	54.9106374874034	2.71850285497604	1.43613496878271	5.09049719160975
ENSG00000030066	38.7840606194196	12.0530363790169	3.29882890503838	11.099948431109	31.3882957993918	24.1630949020771	18.1499850251994	10.0842451173191	3.28508591686768	76.5669677911188	15.7510375025461	17.5265019032608	45.430122627404	12.3839581768013	4.66686207587471	0	3.31398703665967	14.1810490315623	59.1045147143065	61.386160727627	23.4601991290222	58.7926497859204	50.2735466711253	16.9454873517133	0	35.3083322844189	1.33414588444208	9.33022658415451	20.396434475038	19.8814377109564	116.89562276397	15.7974846566099	223.981876430829
ENSG00000030110	2.28141533055409	50.6532668080205	42.8847757654989	15.6221496437831	12.7249847835372	20.8681274154302	61.2561994600481	22.0592861941356	21.5877074537019	17.4255857731512	37.6274784783045	32.5492178203415	60.5734968365386	5.09927689632995	14.9339586427991	57.4804175808337	36.4538574032564	62.3106699871678	8.57241053108262	65.6906780957228	65.08313306761	62.4671903975404	35.6485149122525	16.9454873517133	33.656338553669	54.2542666809364	82.717044835409	32.6557930445408	18.8274779769581	39.7628754219128	123.69187990141	14.3613496878271	0
ENSG00000030419	271.488424335937	157.147183169461	145.148471821689	175.954738093136	284.191326832332	166.945019323442	213.262324046093	328.998496952536	185.372705308962	199.602164310641	183.762104196371	237.859668687111	310.43917128726	311.784358804174	213.742283075062	238.133158549168	318.142755519328	180.486078583521	359.138883302198	264.634241673368	241.413016843809	268.976372770586	203.83638013929	159.5700058953	176.295106709695	197.209953491023	78.7146071820827	173.775470129878	221.222866229258	197.867641980471	57.0885599544968	57.4453987513086	81.4479550657559
ENSG00000030582	746.022813091189	718.29994015711	597.088031811946	432.075770410947	475.914430904293	787.497229308603	792.9274707884	318.283986515385	768.710104547038	281.97766069281	561.787004257476	386.417637200465	563.058186503279	753.964512528785	468.552952417821	845.783287260839	570.005770305463	973.765366833947	629.395404782118	433.446183674342	1156.36078287568	629.081352709348	873.845647592651	875.516846505187	692.35896453262	420.255272068206	765.799737669754	486.338060699054	720.151032618648	609.697423135996	532.826559575303	1367.20049028114	1119.90938215414
ENSG00000031003	36.5026452888655	79.0313018269718	3.29882890503838	50.1553225405667	55.9899330475638	58.2110922640948	58.9874513318982	26.4711434329627	56.7850565629985	17.953633826883	49.0032277856988	206.979641524223	66.7685135584573	5.09927689632995	34.5347793614728	0	59.651766659874	55.4350098506528	28.8754881046993	73.9254069738192	41.6229339385878	35.2755898715522	32.9063214574638	55.0728338930682	102.571698449277	68.8943068964272	141.419463750861	59.480194473985	51.2525789372749	45.4432861964718	50.2923028170567	73.2428834079184	91.6289494489754
ENSG00000031081	0	18.1558396088989	3.29882890503838	0	0	5.49161247774479	13.0453017368621	0	18.7719195249582	0	14.0009222244854	0.834595328726706	3.44167595662151	0	12.1338413972742	0	46.3958185132354	5.5864738609185	5.41415401963113	0.374305858095287	0	30.8661411376082	64.8985784299981	16.9454873517133	9.61609672961972	5.16707301723204	0	3.49883496905794	7.32179699103927	19.8814377109564	1.35925142748802	56.0092637825259	5.09049719160975
ENSG00000031691	0	11.5953261367758	13.1953156201535	13.5666036380221	9.33165550792731	10.9832249554896	26.0906034737242	15.7566329958111	5.63157585748746	24.2902104716653	28.0018444489708	4.17297664363353	27.5334076529721	0	10.2670965669244	0	0	1.71891503412877	23.0101545834323	54.6486552819119	1.51356123413046	28.6614167706362	118.828383040842	14.1212394597611	16.0268278826995	15.5012190516961	4.00243765332624	4.66511329207726	13.5976229833586	19.8814377109564	4.07775428246406	1.43613496878271	0
ENSG00000031698	134.603504502692	125.107466212581	115.459011676343	78.9329666212197	123.00818624086	107.635604563798	81.6749326133974	119.750410768165	141.727992413434	2.64024026865927	120.757954186186	131.86606193882	87.4185692981864	181.388563883737	108.271200160293	65.6919058066671	69.5937277698531	97.5484281868076	45.1179501635927	61.1990077985794	96.8679189843497	23.5170599143682	38.3907083670411	97.4365522723515	30.4509729771291	76.6449164222752	61.3707106843357	125.958058886086	96.7523173815903	104.140864200248	9.51475999241613	100.52944781479	71.2669606825364
ENSG00000031823	38.7840606194196	32.9551374413628	32.9882890503838	45.6331213278926	75.5015763823209	62.6043822462906	30.628099730024	20.1684902346382	57.2543545511225	10.5609610746371	21.8764409757584	52.5795057097825	43.365117053431	75.0322171888549	28.9345448704232	0	3.31398703665967	64.4593137798288	62.262771225758	51.0927496300067	94.597577133154	63.9370066421884	31.0781924876047	33.8909747034266	12.8214623061596	31.0024381033922	24.0146259199574	10.4965049071738	12.5516519846387	31.2422592600743	51.6515542445447	25.8504294380889	142.533921365073
ENSG00000032219	91.2566132221637	51.8738274539969	247.412167877878	143.477111202113	126.40151551647	191.108114225519	91.3171121580346	129.834655885484	82.5964459098161	104.025466585175	131.25864585455	272.078077164906	53.0018097319713	27.6817888657911	62.5359518167211	197.075717420001	29.825883329937	93.6808693600178	89.3335413239136	51.0927496300067	114.27387317685	226.351701675794	110.601802676476	129.915403029802	131.419988638136	36.1695111206243	454.943746594749	240.253334541979	186.182837772141	125.91577216939	164.46942272605	277.174048975064	66.1764634909267
ENSG00000032389	18.2513226444327	38.6002304290036	46.1836046705373	31.6554084887183	33.9332927560993	31.8513523709198	30.628099730024	37.1856538701143	35.6666470974206	11.6170571821008	28.0018444489708	71.7751982704967	13.766703826486	26.2248526096969	51.3354828346218	0	3.31398703665967	26.2134542704637	50.5321041832239	167.127565639546	36.3254696191312	14.6981624464801	64.8985784299981	35.3030986494027	17.6295106709695	17.2235767241068	16.009750613305	34.9883496905794	11.5056809859189	26.5085836146085	58.4478113819848	4.30840490634814	10.1809943832195
ENSG00000032444	6.84424599166228	2.89883153419395	0	20.5554600576093	6.78665855121986	12.0815474510385	4.53749625629986	5.67238787849201	18.7719195249582	0.528048053731854	6.12540347321236	23.3686692043478	3.44167595662151	1.45693625609427	10.2670965669244	0	43.0818314765757	4.29728758532192	5.86533352126705	0	9.83814802184802	0.734908122324005	0	4.23637183792833	3.20536557653991	0.861178836205339	30.6853553421678	15.1616181992511	7.84478249039922	8.52061616183845	0	8.61680981269629	0
ENSG00000032742	2.28141533055409	23.1906522735516	0	198.565744156506	52.5966037719539	74.6859296973291	45.3749625629986	54.2028175055903	20.1798134893301	73.9267275224595	11.3757493073944	30.0454318341614	3.44167595662151	0	43.8685035132222	41.0574411291669	19.883922219958	48.1296209556055	36.996719134146	78.0427714128673	46.1636176409792	16.9028868134521	28.3359990328161	38.1273465413549	8.01341394134976	49.9483724999097	56.0341271465674	81.639482611352	15.1665794814385	40.709610551006	8.15550856492811	2.87226993756543	86.5384522573657
ENSG00000033011	29.6583992972032	18.1558396088989	3.29882890503838	25.4887704714355	23.7533049292695	24.1630949020771	26.6577905057617	15.7566329958111	47.8683947886434	0.528048053731854	27.1267868099404	28.376241176708	32.3517539922422	5.09927689632995	17.7340758883239	0	3.31398703665967	9.88376144624042	1.35353850490778	20.3996692661931	36.3254696191312	0	22.8516121232388	21.1818591896416	6.41073115307981	0	6.6707294222104	22.159288137367	27.1952459667173	10.4140864200248	1.35925142748802	0	0
ENSG00000033030	2.28141533055409	45.3133139818738	0	41.1109201152186	61.0799269609787	28.5563848842729	32.896847858174	54.2028175055903	32.3815611805529	41.7157962448164	44.6279395905472	54.2486963672359	44.0534522447553	64.1051952681479	38.2682690221726	16.4229764516668	59.651766659874	61.4512124701034	46.9226681701364	61.1990077985794	12.865270490109	63.9370066421884	119.742447525771	39.539470487331	73.7234082604178	32.7247957758029	25.3487718043995	32.6557930445408	12.5516519846387	34.0824646473538	16.3110171298562	21.5420245317407	432.692261286828
ENSG00000033050	2.28141533055409	21.359811304587	19.7929734302303	24.6665520691312	65.3215885554911	17.5731599287833	65.2265086843105	34.6645925907845	22.5263034299498	0.528048053731854	31.5020750050921	1.66919065745341	24.7800668876749	43.7080876828281	36.4015241918227	0	36.4538574032564	35.6674869581719	18.0471800654371	13.2878579623827	17.4059541925003	7.34908122324005	3.6562579397182	14.1212394597611	6.41073115307981	14.6400402154908	5.33658353776832	53.6488028588885	31.9021154609568	58.697578003776	2.71850285497604	15.7974846566099	50.9049719160975
ENSG00000033100	34.2212299583114	31.2768665531452	52.781262480614	34.1220636956314	71.2599147878085	60.4077372551927	49.9124588192984	10.0842451173191	44.5833088717757	97.1608418866611	31.5020750050921	1.66919065745341	25.4684020789992	30.5956613779797	37.3348966069977	0	29.825883329937	41.6836895776226	18.0471800654371	16.0951518980973	19.676296043696	24.2519680366922	52.1016756409844	35.3030986494027	28.8482901888591	37.0306899568296	42.6926683021466	32.6557930445408	83.1546943982317	51.1236969710307	59.8070628094728	104.837852721138	40.723977532878
ENSG00000033170	34.2212299583114	32.6499972798687	0	7.39996562073935	19.5116433347571	6.58993497329375	25.5234164416867	12.6053063966489	5.63157585748746	0	25.3766715318798	0.834595328726706	6.88335191324302	45.8934920669695	3.73348966069977	49.2689293550003	3.31398703665967	10.3134902047726	10.3771285376263	6.92465837476281	8.32458678771756	31.6010492599322	2.74219345478865	31.0667268114744	17.6295106709695	18.0847555603121	4.00243765332624	12.8290615532125	42.8848109475157	35.9759349055401	1.35925142748802	0	5.09049719160975
ENSG00000033178	209.890210410977	232.21166289701	29.6894601453454	99.0773174776768	288.432988426844	209.779596649851	147.468628329745	170.17163635476	124.363966852848	21.649970203006	241.515908372373	93.4746768173911	192.04551837948	185.030904523972	123.205158803092	32.8459529033335	69.5937277698531	167.594215827555	126.781439959696	192.95466984812	168.762077605547	124.199472672757	188.297283895487	148.273014327491	256.429246123192	123.148573577364	162.765797901934	160.946408576665	310.130401120449	201.654582496843	70.681074229377	63.1899386264394	239.253368005658
ENSG00000033327	75.2867059082851	19.9866805778635	224.32036554261	140.188237592895	55.1416007286614	113.127217041543	28.9265386339116	8.82371447765423	46.9297988123955	143.629070615064	56.0036888979415	68.4368169555899	41.3001114794581	5.09927689632995	48.5353655890969	648.707569840838	36.4538574032564	42.543147094687	42.4108731537772	20.3996692661931	33.2983471508702	214.593171718609	36.562579397182	96.0244283263754	110.585112390627	37.8918687930349	517.648603163527	131.789450501183	29.2871879641571	66.2714590365213	16.3110171298562	511.264048886646	1140.27137092058
ENSG00000033627	134.603504502692	84.8289648953597	131.953156201535	31.2442992875661	50.0516068152465	62.6043822462906	43.6734014668861	59.8752053840823	26.2806873349415	14.25729745076	43.7528819515168	0	30.9750836095936	26.2248526096969	23.3343103793735	57.4804175808337	115.989546283088	33.9485719240432	61.811591724122	19.2767516919073	35.5686890020659	60.2624660305684	14.6250317588728	18.3576112976894	19.2321934592394	23.2518285775442	32.0195012266099	16.3278965222704	38.1779414532762	20.8281728400496	47.5737999620806	63.1899386264394	300.339334304975
ENSG00000033800	9.12566132221637	11.7478962175228	98.9648671511513	109.766156707634	96.709884354883	65.8993497329375	65.2265086843105	54.2028175055903	61.4780364442381	35.907267653766	49.0032277856988	148.557968513354	82.6002229589163	193.772522060538	122.271786387917	197.075717420001	39.767844439916	105.283545840387	95.6500543468166	90.0205588719165	80.2187454089146	96.2729640244447	105.117415766898	83.3153128125904	129.817305849866	78.3672740946859	349.546221723825	191.269644975168	81.0627524007919	84.2594264892914	125.051131328898	172.336196253926	213.800882047609
ENSG00000033867	54.7539679332982	86.3546657028302	65.9765781007675	53.4441961497842	52.5966037719539	118.618829519287	88.4811769978472	52.9422868659254	119.670986971609	68.646246985141	151.384971552248	2.50378598618012	87.4185692981864	51.7212370913466	69.0695587229457	49.2689293550003	9.94196110997901	48.9890784726699	36.0943601308742	3.18159979380994	58.2721075140229	24.2519680366922	1.8281289698591	88.9638085964948	60.9019459542582	114.53678521531	60.0365647998936	51.3162462128498	114.533824359829	68.1649292947076	6.79625713744009	53.1369938449604	5.09049719160975
ENSG00000034152	335.368053591452	275.846705990666	349.675863934068	298.054170835335	268.073012773184	305.33365376261	236.51699235963	125.422798646657	207.429710750788	206.466789009155	286.14384796292	521.622080454191	364.81765140188	415.226832986867	155.873193334215	2151.40991516835	1130.06957950095	238.499460985367	341.994062240033	305.433580205754	588.775320076751	953.910742776559	457.032242464775	423.637183792833	288.482901888591	170.513409568657	851.185074274047	341.719548644659	281.889184155012	259.405425371526	910.698456416972	1783.67963122813	3456.44759310302
ENSG00000034239	29.6583992972032	0.3051401614941	92.3672093410745	172.665864483918	6.78665855121986	46.1295448130562	114.004593439534	245.173209414821	8.91666177435514	234.981383910675	3.50023055612135	0.834595328726706	1.3766703826486	1.45693625609427	106.404455329943	8.21148822583339	36.4538574032564	20.197251651013	121.8184654417	180.228270672881	73.4077198553275	2.20472436697202	0	52.248586001116	1.60268278826995	1.72235767241068	2.66829176888416	64.1453077660623	0.522985499359948	110.7680101039	10.8740114199041	8.61680981269629	15.2714915748292
ENSG00000034510	752.867059082851	1016.72701809834	399.158297509643	343.687292163227	638.794236133569	660.091819824924	460.555870014436	722.284056527982	908.560905007977	542.833399236345	956.437999460158	543.321559001086	1277.55011509791	589.330715590133	462.019345511596	517.323758227503	1033.96395543782	620.958056079017	799.038897397227	672.253321139135	905.109618010018	1124.40942715573	1049.34602869912	747.013567421361	1804.62081959197	731.140831938333	952.580161491645	866.54479400335	602.47929526266	737.506665563573	1258.66682185391	963.646564053201	1038.46142708839
ENSG00000034533	0	11.4427560560287	0	0	0.848332318902482	0	18.1499850251994	39.706715149444	5.1622778693635	0	10.500691668364	0	0	0	1.86674483034988	0	0	2.14864379266096	0	0	0.756780617065232	2.93963248929602	0	11.2969915678089	4.80804836480986	0	1.33414588444208	0	21.4424054737579	2.84020538727948	0	0	5.09049719160975
ENSG00000034677	438.031743466386	234.347644027469	451.939559990258	233.921135455594	201.903091898791	210.8779191454	137.259261753071	219.962596621523	194.289367083317	173.72780967778	197.763026420856	112.670369378105	258.814031937938	360.591723383332	180.140876128764	16.4229764516668	132.559481466387	164.58611451783	176.862364641283	148.973731521924	167.248516371416	207.978998617693	178.242574561262	129.915403029802	160.268278826995	124.009752413569	130.746296675324	218.094046404612	198.21150425742	257.51195511334	216.120976970595	122.071472346531	50.9049719160975
ENSG00000034693	0	23.3432223542986	6.59765781007675	1.64443680460874	6.78665855121986	13.1798699465875	41.4046533387362	36.5553885502818	7.50876780998328	77.0950158448506	10.500691668364	97.6476534610246	13.0783686351617	22.5825119694612	28.0011724552482	0	3.31398703665967	11.6026764803692	27.9731291014275	36.3076682352428	0.756780617065232	14.6981624464801	0	14.1212394597611	17.6295106709695	17.2235767241068	4.00243765332624	16.3278965222704	8.36776798975916	21.7749079691427	0	1.43613496878271	15.2714915748292
ENSG00000034713	95.8194438832719	189.034330045595	65.9765781007675	154.16595043207	140.823164937812	151.568504385756	140.662383945296	246.433740054486	144.074482354054	309.436159486866	98.0064555713977	195.295306922049	208.565562971264	343.108488310201	201.608441677787	599.438640485837	533.551912902207	208.848176646645	267.549444470105	266.318618034797	280.765608931201	489.448809467787	293.414699662386	169.454873517133	294.893633041671	173.096946077273	300.182823999468	221.59288137367	249.987068694055	187.453555560446	341.172108299493	575.890122481869	346.153809029463
ENSG00000035115	130.040673841583	34.4808382488333	19.7929734302303	33.2998452933271	53.4449360908564	52.71947978635	79.4061844852475	69.329185181569	73.210486147337	139.404686185209	63.0041500101842	45.9027430799688	121.835328864402	171.190010091077	140.005862276241	238.133158549168	6.62797407331934	91.1024968088247	83.0170283010106	17.7795282595261	12.1084898730437	72.0209959877525	124.312769950419	121.442659353945	65.7099943190681	98.1743873274087	24.0146259199574	32.6557930445408	29.810173463517	65.3247239074282	4.07775428246406	43.0840490634814	61.085966299317
ENSG00000035141	34.2212299583114	61.333172460314	9.89648671511513	39.877592511762	45.8099452207341	47.2278673086052	44.8077755309611	40.9672457891089	58.6622485154944	41.1877481910846	79.6302451517606	43.3989570937887	48.1834633927012	83.7738347254206	64.402696647071	0	36.4538574032564	64.4593137798288	45.5691296652287	22.0840456276219	48.4339594921749	49.9737523180323	138.023737224362	60.7213296769727	40.0670697067488	77.5060952584805	32.0195012266099	10.4965049071738	82.6317088988718	31.2422592600743	214.761725543107	18.6697545941753	15.2714915748292
ENSG00000035403	221.297287063747	131.515409603957	92.3672093410745	94.5551162650028	83.9848995713457	124.110441997032	65.7936957163479	122.271472047494	138.442906496567	64.949910609018	112.007377795883	31.7146224916148	52.313474540647	212.712693389764	70.0029311381206	24.6344646775002	129.245494429727	91.1024968088247	121.8184654417	91.33062937525	70.3805973870666	88.1889746788806	99.633028857321	101.67292411028	19.2321934592394	107.647354525667	76.0463154131986	83.9720392573906	187.751794270221	119.288626265738	141.362148458754	170.900061285143	20.361988766439
ENSG00000035499	0	0	0	0	2.54499695670745	0	4.53749625629986	0	0.469297988123955	0	0	0	24.0917316963506	0	2.80011724552482	0	0	0	0	0	0	0	0	0	0	0	0	0	0	1.89347025818632	1.35925142748802	0	0
ENSG00000035664	18.2513226444327	26.2420538884926	0	36.9998281036967	28.8432988426844	50.5228347952521	34.5984089542864	2.52106127932978	9.3859597624791	130.427869271768	15.7510375025461	65.9330309694098	6.19501672191872	21.1255757133669	6.53360690622459	41.0574411291669	86.1636629531514	70.9052451578117	44.6667706619568	60.4503960823888	39.3525920873921	129.343829529025	40.2188373369002	25.4182310275699	27.2456074005892	16.3623978879014	81.3828989509669	34.9883496905794	58.0513904289542	26.5085836146085	5.43700570995207	34.4672392507851	320.701323071414
ENSG00000035681	59.3167985944064	49.5852762427912	135.251985106573	108.121719903025	55.1416007286614	95.5540571127593	23.8218553455743	61.7660013435796	37.0745410617924	165.27904081807	64.7542652882449	116.843346021739	94.3019212114294	96.1577929022219	34.5347793614728	246.344646775002	125.931507393067	59.7322974359747	56.3974377044909	9.17049352333453	22.703418511957	72.7559041100765	89.578319523096	134.15177486773	227.580955934333	67.1719492240165	538.994937314601	131.789450501183	12.5516519846387	33.1357295182607	119.614125618946	539.986748262301	371.606294987511
ENSG00000035687	73.005290577731	80.5570026344423	194.630905397264	171.021427679309	65.3215885554911	119.717152014836	137.826448785108	185.928269350571	147.828866259046	93.4645055105381	101.506686127519	174.430423703882	147.992066134725	273.904016145723	153.07307608869	172.441252742501	96.1056240631304	195.096856373615	173.704108129832	284.659605081466	91.5704546648931	194.750652415861	74.0392232792936	153.921510111396	96.1609672961972	161.040442370398	102.72923310204	127.124337209105	154.280722311185	104.140864200248	235.150496955427	70.370613470353	25.4524859580487
ENSG00000035720	22.8141533055409	0	0	16.4443680460874	0	1.09832249554896	7.37343141648727	0	0.469297988123955	38.0194598686935	0.875057639030337	0	8.26002229589163	0	9.33372415174941	0	0	5.1567451023863	5.41415401963113	0	0.756780617065232	1.46981624464801	19.1953541835206	12.709115513785	8.01341394134976	0	0	0	0.522985499359948	0.946735129093162	0	4.30840490634814	0
ENSG00000035862	168.824734461003	113.206999914311	300.193430358492	111.821702713395	210.386415087816	227.352756578634	62.3905735241231	143.070227601965	172.232361641491	145.21321477626	34.1272479221831	88.4671048450309	69.5218543237545	288.473378706666	62.5359518167211	394.151434840003	135.873468503046	188.2211962371	120.013747435157	103.682722692394	167.248516371416	170.498684379169	106.031480251828	169.454873517133	89.7502361431173	93.868493146382	373.560847643783	165.611521868743	140.683099327826	94.6735129093162	349.327616864421	633.335521233177	203.61988766439
ENSG00000035928	61.5982139249605	158.215173734691	141.84964291665	68.655236592415	76.3499087012234	59.3094147596437	50.4796458513359	101.472716493024	57.2543545511225	70.7584392000684	59.5039194540629	47.5719337374223	110.133630611888	80.859962213232	109.204572575468	0	86.1636629531514	94.5403268770822	119.562567933521	173.677918156213	114.27387317685	30.8661411376082	125.226834435348	112.969915678089	72.1207254721479	100.757923836025	66.707294222104	65.3115860890816	105.12008537135	53.9639023583102	25.8257771222724	70.370613470353	20.361988766439
ENSG00000036054	52.4725526027442	25.4792034847573	65.9765781007675	49.7442133394145	47.506609858539	43.9328998219583	37.4343441144738	28.9922047122925	62.416632420486	82.903544435901	41.1277090344258	40.0605757788819	38.5467707141609	48.8073645791581	50.4021104194468	8.21148822583339	9.94196110997901	30.5107418557856	50.5321041832239	34.9975977319093	20.4330766607613	40.4199467278203	42.9610307916889	42.3637183792832	46.4778008598286	68.0331280602218	68.0414401065461	40.819741305676	54.9134774327945	39.7628754219128	2.71850285497604	41.6479140946987	111.990938215414
ENSG00000036257	152.854827147124	87.2700861873125	79.171893720921	108.121719903025	151.851485083544	117.520507023738	83.3764937095099	149.372880800289	82.1271479216921	192.737539612127	112.007377795883	110.166583391925	103.250278698645	107.084814822929	104.537710499593	24.6344646775002	3.31398703665967	116.026764803692	175.05764663474	52.4028201333402	77.9484035577189	63.2020985198644	33.8203859423934	98.8486762183276	76.9287738369577	136.066256120444	229.473092124038	142.285955408356	154.280722311185	77.6322805856393	86.9920913592332	149.358036753402	40.723977532878
ENSG00000036448	0	0	0	0.411109201152186	0.848332318902482	0	4.53749625629986	0	6.57017183373537	0.528048053731854	2.62517291709101	0	4.81834633927012	0	4.66686207587471	0	3.31398703665967	15.0405065486267	16.6936415605293	63.0705370890558	15.8923929583699	1.46981624464801	3.6562579397182	14.1212394597611	6.41073115307981	27.5577227585709	4.00243765332624	3.49883496905794	8.36776798975916	19.8814377109564	4.07775428246406	7.18067484391357	0
ENSG00000036530	0	0	0	0.822218402304372	0	0	0.567187032037482	0	0	22.1780182567379	0	0	0	0	2.80011724552482	0	0	0	0	0	20.4330766607613	0	0	0	0	6.88943068964271	0	0	0.522985499359948	0	0	1.43613496878271	66.1764634909267
ENSG00000036549	47.909721941636	12.9684568634992	9.89648671511513	20.5554600576093	46.6582775396365	34.0479973620177	36.2999700503989	44.1185723882712	53.9692686342548	50.6926131582579	52.5034583418202	120.181727336646	28.9100780356207	51.7212370913466	66.2694414774208	114.960835161667	59.651766659874	55.4350098506528	31.131385612879	172.36784765288	3.02712246826093	61.7322822752164	40.2188373369002	32.4788507574505	44.8751180715587	32.7247957758029	26.6829176888416	22.159288137367	23.0113619718377	50.1769618419376	5.43700570995207	45.9563190010469	10.1809943832195
ENSG00000036672	0	0	9.89648671511513	16.8554772472396	3.39332927560993	6.58993497329375	29.4937256659491	33.4040619511196	0	12.1451052358326	0	70.1060076130433	0.688335191324302	0	8.40035173657447	0	6.62797407331934	3.43783006825754	27.9731291014275	47.9111498361967	18.9195154266308	0	0	4.23637183792833	0	21.5294709051335	0	9.33022658415451	0.522985499359948	4.73367564546581	1.35925142748802	1.43613496878271	0
ENSG00000037042	0	0	26.390631240307	6.98885641958716	0	0	5.67187032037482	10.0842451173191	1.40789396437186	0	2.62517291709101	0.834595328726706	0	0	3.73348966069977	0	0	17.1891503412877	17.5960005638012	0	0	0	0	0	1.60268278826995	0	0	0	0	0	1.35925142748802	0	0
ENSG00000037241	0	19.8341104971165	0	33.7109544944792	26.298301885977	19.7698049198812	35.7327830183614	71.8502464608987	30.0350712399331	55.4450456418446	62.1290923711539	10.8497392734472	63.3268376018358	144.236689353333	45.7352483435721	0	0	26.6431830289959	57.7509762093987	24.5170337052413	2.2703418511957	22.0472436697201	17.3672252136615	15.5333634057372	30.4509729771291	36.1695111206243	10.6731670755366	38.4871846596374	39.2239124519961	18.9347025818632	4.07775428246406	12.9252147190444	66.1764634909267
ENSG00000037474	77.5681212388392	85.896955460589	23.0918023352686	35.7665005002402	44.1132805829291	119.717152014836	131.587391432696	78.1528996592232	104.653451351642	127.787629003109	70.0046111224269	38.3913851214285	68.1451839411059	40.7942151706396	91.4704966871442	16.4229764516668	106.047585173109	148.256421693606	69.4816432519328	145.230672940971	69.6238167700014	93.3333315351486	74.0392232792936	93.2001804344231	70.5180426838779	95.5908508187927	50.6975436087991	33.8220713675601	100.93620137647	111.714745232993	93.7883484966733	31.5949693132197	20.361988766439
ENSG00000037637	47.909721941636	13.7313072672345	0	19.3221324541527	35.6299573939043	29.6547073798219	19.8515461213119	10.7145104371516	20.649111477454	8.97681691344151	4.37528819515168	1.66919065745341	53.0018097319713	86.6877072376091	40.1350138525225	49.2689293550003	6.62797407331934	21.9161666851418	36.996719134146	105.741404911919	8.32458678771756	13.2283462018321	10.0547093342251	18.3576112976894	28.8482901888591	36.1695111206243	12.0073129599787	3.49883496905794	37.6549559539162	15.1477620654906	1.35925142748802	4.30840490634814	15.2714915748292
ENSG00000037749	2.28141533055409	16.9352789629225	0	7.39996562073935	5.08999391341489	10.9832249554896	3.40312219222489	16.3868983156436	25.3420913586936	0	3.50023055612135	45.9027430799688	0	0	12.1338413972742	0	3.31398703665967	2.57837255119315	24.3636930883401	0.374305858095287	9.83814802184802	0.734908122324005	25.5938055780274	14.1212394597611	12.8214623061596	18.0847555603121	20.0121882666312	12.8290615532125	33.9940574583966	11.3608215491179	0	0	5.09049719160975
ENSG00000037757	82.1309518999474	9.00163476407594	3.29882890503838	26.3109888737399	40.7199513073192	40.6379323353114	27.2249775377992	5.04212255865956	42.7061169192799	64.4218625552861	18.3762104196371	55.0832916959626	33.7284243748908	16.026298817037	28.0011724552482	90.3263704841673	0	42.1134183361548	37.8990781374179	0.374305858095287	11.3517092559785	26.4566924036642	69.4689008546459	18.3576112976894	46.4778008598286	38.7530476292403	32.0195012266099	4.66511329207726	23.5343474711977	33.1357295182607	9.51475999241613	28.7226993756543	10.1809943832195
ENSG00000037897	0	24.2586428387809	0	4.52220121267404	15.2699817402447	9.88490245994062	1.13437406407496	14.4961023561462	15.4868336080905	38.5475079224253	6.12540347321236	0.834595328726706	0.688335191324302	0	10.2670965669244	0	0	13.3215915144979	17.5960005638012	71.8667247542951	0	0	35.6485149122525	16.9454873517133	3.20536557653991	11.1953248706694	4.00243765332624	53.6488028588885	10.9826954865589	17.0412323236769	4.07775428246406	27.2865644068716	5.09049719160975
ENSG00000038002	61.5982139249605	51.8738274539969	36.2871179554221	44.3997937244361	40.7199513073192	52.71947978635	34.0312219222489	56.7238787849201	75.5569760879567	58.6133339642357	100.631628488489	72.6097935992234	207.188892588615	148.607498121616	119.471669142392	8.21148822583339	72.9077148065127	83.3673791552452	105.124823881171	45.8524676166726	91.5704546648931	26.4566924036642	54.843869095773	69.1940733528293	46.4778008598286	113.675606379105	29.3512094577258	52.4825245358691	71.1260279129529	57.7508428746829	70.681074229377	53.1369938449604	35.6334803412682
ENSG00000038210	79.8495365693933	46.9915848700913	26.390631240307	15.6221496437831	35.6299573939043	15.3765149376854	41.4046533387362	17.6474289553085	23.4648994061977	31.1548351701794	31.5020750050921	105.993606748292	4.13001114794581	8.01314940851849	26.1344276248984	0	0	10.3134902047726	76.7005152781076	7.86042302000102	1.51356123413046	24.2519680366922	12.7969027890137	7.06061972988054	40.0670697067488	43.058941810267	14.6756047288629	22.159288137367	27.7182314660772	8.52061616183845	125.051131328898	24.4142944693061	193.43889328117
ENSG00000038219	253.237101691504	198.188534890418	1085.31470975763	527.041995877102	450.464461337218	442.62396570623	199.649835277194	165.129513796101	268.438449206902	166.863184979266	384.150303534318	459.027430799688	208.565562971264	253.506908560403	217.475772735761	788.302869680005	208.781183309559	184.783366168843	195.360724208356	63.6319958761988	212.65535339533	449.763770862291	191.039477350276	360.091606223908	261.237294488002	113.675606379105	1019.28745571375	810.563434498423	237.435416709416	264.139101016992	164.46942272605	784.129692955362	539.592702310633
ENSG00000038274	70.7238752471769	86.2020956220831	19.7929734302303	48.9219949371101	47.506609858539	79.079219679525	66.3608827483854	104.624043092186	51.1534807055111	44.3560365134757	70.8796687614573	18.3610972319875	75.7168710456733	61.9197908840065	84.9368897809197	172.441252742501	119.303533319748	42.1134183361548	68.128104747025	18.3409870466691	82.4890872601103	39.6850386054963	76.7814167340823	77.666817028686	100.969015661007	105.924996853257	101.395087217598	72.3092560271975	58.0513904289542	59.6443131328692	89.7105942142092	81.8596932206147	35.6334803412682
ENSG00000038295	15.9699073138787	0.15257008074705	39.5859468604605	0	1.69666463780496	4.39328998219583	0.567187032037482	43.4883070684387	6.57017183373537	78.1511119523143	0	0	0	0	20.5341931338487	0	0	2.14864379266096	2.70707700981556	0	14.3788317242394	0	0.914064484929551	1.41212394597611	4.80804836480986	0	1.33414588444208	9.33022658415451	15.1665794814385	15.1477620654906	0	11.4890797502617	157.805412939902
ENSG00000038358	0	0	0	0	0	0	0	0	6.57017183373537	0	0.875057639030337	0	0	0	0	0	59.651766659874	0	0	0	0	0	0	8.47274367585665	0	0	0	0	8.89075348911911	0	0	0	0
ENSG00000038382	102.663689874934	58.4343409261201	26.390631240307	20.5554600576093	24.601637248172	97.7507021038573	19.2843590892744	59.2449400642498	92.9210016485431	6.8646246985141	54.2535736198809	4.17297664363353	59.19682645389	55.3635777315823	44.8018759283972	123.172323387501	119.303533319748	71.3349739163439	73.5422587666561	20.9611280533361	52.9746431945663	80.8398934556405	89.578319523096	49.4243381091638	64.1073115307981	53.393087844731	46.6951059554728	62.979029443043	74.7869264084725	54.9106374874034	84.2735885042571	71.8067484391357	254.524859580487
ENSG00000038427	2.28141533055409	17.8506994474048	323.285232693761	40.6998109140664	5.08999391341489	49.4245122997031	0.567187032037482	5.67238787849201	29.0964752636852	66.0060067164817	14.0009222244854	2.50378598618012	0	0	22.4009379641986	24.6344646775002	3.31398703665967	33.0891144069788	0.451179501635927	0.935764645238217	21.1898572778265	8.08398934556405	0	28.2424789195222	6.41073115307981	6.88943068964271	33.353647111052	69.9766993811589	3.66089849551963	17.0412323236769	5.43700570995207	201.05889562958	356.334803412682
ENSG00000038532	2.28141533055409	8.08621427959364	0	9.86662082765246	19.5116433347571	43.9328998219583	17.0156109611245	20.1684902346382	15.4868336080905	8.97681691344151	17.5011527806067	41.7297664363353	13.766703826486	0.728468128047135	38.2682690221726	8.21148822583339	6.62797407331934	24.0648104778027	21.6566160785245	48.285455694292	23.4601991290222	8.08398934556405	16.4531607287319	7.06061972988054	20.8348762475094	6.02825185343738	8.00487530665248	17.4941748452897	21.9653909731178	28.4020538727948	4.07775428246406	14.3613496878271	0
ENSG00000038945	68.4424599166228	0.915420484482299	0	0	9.33165550792731	1.09832249554896	5.67187032037482	0	28.6271772755613	0	31.5020750050921	0.834595328726706	25.4684020789992	54.6351096035352	28.0011724552482	8.21148822583339	53.0237925865547	21.4864379266096	0.902359003271854	0	3.02712246826093	39.6850386054963	0	40.9515944333071	59.2992631659883	6.02825185343738	0	13.9953398762318	13.0746374839987	50.1769618419376	0	179.516871097839	0
ENSG00000039068	759.711305074513	677.106018355407	112.160182771305	437.420190025926	560.747662794541	507.424992943619	689.699430957578	521.859684821265	521.859362793838	1207.11785083102	366.649150753711	588.389706752328	583.019907051684	613.370163815688	616.025794015461	648.707569840838	566.691783268804	612.793209666906	641.577251326289	594.584855584363	577.423610820772	471.811014532011	625.220107691813	439.17054719857	524.077271764275	430.58941810267	273.499906310626	306.73119895408	926.207319366468	462.006742997463	327.579594024612	267.121104193585	519.230713544194
ENSG00000039123	84.4123672305015	112.596719591323	217.722707732533	222.410077823333	126.40151551647	96.6523796083083	100.959291702672	132.985982484646	140.320098449063	68.1181989314091	164.510836137703	133.535252596273	110.133630611888	65.5621315242422	150.272958843166	8.21148822583339	135.873468503046	82.0781928796487	98.8083108582681	238.619984535745	149.842562178916	71.2860878654285	119.742447525771	149.685138273467	128.214623061596	141.233329137676	34.6877929954941	108.463884040796	128.654432842547	149.58415039672	86.9920913592332	89.0403680645283	178.167401706341
ENSG00000039139	2.28141533055409	16.4775687206814	75.8730648158827	510.186518629863	17.8149786969521	49.4245122997031	183.768598380144	462.614744757015	62.88593040861	253.46306579129	11.3757493073944	31.7146224916148	0.688335191324302	1.45693625609427	111.071317405818	24.6344646775002	102.73359813645	73.0538889504726	307.253240614066	163.758812916688	85.5162097283713	24.2519680366922	47.5313532163366	49.4243381091638	28.8482901888591	44.7812994826776	10.6731670755366	131.789450501183	29.810173463517	130.649447814856	10.8740114199041	24.4142944693061	25.4524859580487
ENSG00000039319	20.5327379749868	80.5570026344423	184.734418682149	135.254927179069	82.2882349335408	87.8657996439166	76.5702493250601	85.0858181773801	57.7236525392465	32.7389793313749	90.1309368201247	94.3092721461178	50.2484689666741	56.0920458596294	54.1356000801466	82.1148822583339	341.340664775946	73.913346467537	42.4108731537772	0.187152929047643	83.2458678771756	124.199472672757	35.6485149122525	122.854783299921	200.335348533744	78.3672740946859	482.960810168033	122.459223917028	80.539766901432	78.5790157147324	16.3110171298562	351.853067351765	249.434362388878
ENSG00000039523	157.417657808232	0	29.6894601453454	13.9777128391743	22.904972610367	18.6714824243323	11.9109276727871	3.15132659916223	22.0570054418259	111.418139337421	23.6265562538191	0	12.3900334438374	23.3109800975083	14.9339586427991	0	53.0237925865547	11.172947721837	32.0337446161508	0	0.756780617065232	16.9028868134521	32.9063214574638	15.5333634057372	22.4375590357793	6.88943068964271	64.0390024532199	4.66511329207726	35.0400284571165	9.46735129093162	0	22.9781595005234	5.09049719160975
ENSG00000039560	253.237101691504	257.385726220273	484.927849040641	101.54397268459	209.538082768913	195.501404207715	226.307625782955	144.961023561462	317.245439971794	422.966491039215	254.641772957828	187.783948963509	454.30122627404	268.076271121346	426.551193734948	385.939946614169	152.443403686345	237.640003468302	243.185751381765	154.775472322401	185.411251180982	95.5380559021206	301.641280026752	264.067177897532	238.799735452223	538.236772628337	149.424339057513	100.299935779661	229.067648719657	210.175198658682	275.928039780068	41.6479140946987	76.3574578741462
ENSG00000039650	0	16.6301388014284	23.0918023352686	9.04440242534809	30.5399634804894	40.6379323353114	9.07499251259972	20.1684902346382	43.1754149074039	3.16828832239112	9.6256340293337	2.50378598618012	26.8450724616478	0	19.6008207186738	164.229764516668	6.62797407331934	25.7837255119315	9.47476953435447	58.2045609338171	35.5686890020659	9.55380559021206	1.8281289698591	9.88486762183276	8.01341394134976	0.861178836205339	16.009750613305	33.8220713675601	10.9826954865589	2.84020538727948	0	1.43613496878271	45.8144747244877
ENSG00000040199	0	10.0696253293053	0	6.57774721843497	1.69666463780496	1.09832249554896	0	11.9750410768165	4.22368189311559	0	14.0009222244854	0	0	0	23.3343103793735	0	0	9.88376144624042	6.31651302290298	0	29.5144440655441	14.6981624464801	0	8.47274367585665	6.41073115307981	9.47296719825873	0	4.66511329207726	0	0	0	0	0
ENSG00000040275	104.945105205488	48.5172856775618	72.5742359108443	14.3888220403265	37.3266220317092	43.9328998219583	18.1499850251994	12.6053063966489	22.9956014180738	23.7621624179334	59.5039194540629	13.3535252596273	22.0267261223777	106.356346694882	13.0672138124492	8.21148822583339	109.361572209769	18.4783366168843	15.3401030556215	0.374305858095287	28.7576634484788	3.67454061162003	5.4843869095773	52.248586001116	6.41073115307981	53.393087844731	5.33658353776832	34.9883496905794	22.4883764724778	53.0171672292171	1.35925142748802	1.43613496878271	20.361988766439
ENSG00000040341	57.0353832638523	78.8787317462247	89.0683804360362	115.521685523764	83.1365672524433	99.9473470949552	114.004593439534	125.422798646657	126.710456793468	68.1181989314091	70.8796687614573	63.4292449832297	131.472021542942	117.283368615589	105.471082914768	57.4804175808337	99.4196110997901	116.456493562224	100.613028864812	139.616085069542	149.085781561851	96.2729640244447	139.851866194221	127.09115513785	145.844133732566	175.680482585889	105.397524870924	104.965049071738	189.843736267661	135.383123460322	39.4182913971525	122.071472346531	173.076904514731
ENSG00000040487	0	25.3266334040103	46.1836046705373	3.28887360921749	5.08999391341489	17.5731599287833	0.567187032037482	15.1263676759787	25.8113893468175	0.528048053731854	16.6260951415764	11.6843346021739	19.9617205484048	0	5.60023449104965	0	0	4.72701634385411	43.313232157049	0	4.54068370239139	0.734908122324005	17.3672252136615	15.5333634057372	8.01341394134976	0	10.6731670755366	18.660453168309	21.9653909731178	7.57388103274529	0	5.74453987513086	0
ENSG00000040531	15.9699073138787	26.2420538884926	6.59765781007675	21.3776784599137	21.2083079725621	25.261417397626	40.8374663066987	36.5553885502818	39.4210310024122	1.05609610746371	2.62517291709101	46.7373384086955	28.2217428442964	43.7080876828281	16.8007034731489	0	3.31398703665967	15.0405065486267	28.8754881046993	126.702532965255	28.7576634484788	24.9868761590162	28.3359990328161	19.7697352436655	9.61609672961972	28.4189015947762	4.00243765332624	2.33255664603863	1.56895649807984	24.6151133564222	55.7293085270088	44.5201840322641	10.1809943832195
ENSG00000040608	0	0.15257008074705	6.59765781007675	0	0	2.19664499109792	7.37343141648727	0	0	0	0.875057639030337	0	0	0	0.933372415174941	0	0	2.57837255119315	0	0.187152929047643	18.9195154266308	0	0	2.82424789195222	12.8214623061596	0	0	0	0	0	0	0	0
ENSG00000040633	50.1911372721901	83.1506940071421	138.550814011612	15.2110404426309	34.7816250750018	52.71947978635	24.3890423776117	43.4883070684387	23.4648994061977	5.80852859105039	38.5025361173348	15.8573112458074	70.2101895150788	67.0190677803365	48.5353655890969	41.0574411291669	0	22.7756242022062	23.4613340850682	18.902445833812	73.4077198553275	86.7191584342326	59.4141915204208	28.2424789195222	91.3529189313873	47.3648359912937	242.814550968459	68.8104210581395	51.7755644366348	58.697578003776	138.643645603778	70.370613470353	76.3574578741462
ENSG00000040933	20.5327379749868	0	0	11.099948431109	6.78665855121986	25.261417397626	3.97030922426238	1.26053063966489	16.4254295843384	0	6.12540347321236	8.34595328726706	16.5200445917833	26.2248526096969	4.66686207587471	139.595299839168	36.4538574032564	7.30538889504726	3.15825651145149	1.68437636142879	6.05424493652186	22.7821517920442	4.57032242464775	4.23637183792833	9.61609672961972	1.72235767241068	17.343896497747	0	10.459709987199	11.3608215491179	70.681074229377	0	5.09049719160975
ENSG00000041353	88.9751978916096	112.291579429829	197.929734302303	55.9108513566973	115.373195370738	43.9328998219583	118.542089695834	63.0265319832445	70.3946982185932	25.346306579129	106.757031961701	54.2486963672359	167.95378668313	237.480609743366	70.0029311381206	8.21148822583339	6.62797407331934	89.8133105332281	108.283080392623	35.9333623771475	86.2729903454365	64.6719147645124	96.8908354025324	98.8486762183276	68.915359895608	120.565037068748	65.3731483376619	23.3255664603863	283.981126152452	111.714745232993	141.362148458754	20.105889562958	20.361988766439
ENSG00000041357	371.870698880317	131.36283952321	164.941445251919	141.0104559952	208.689750450011	119.717152014836	114.571780471571	149.372880800289	241.219165895713	203.298500686764	275.643156294556	160.242303115528	271.892400573099	158.806051914276	111.071317405818	24.6344646775002	175.641312942962	161.148284449572	116.404311422069	169.373400788117	143.788317242394	149.921256954097	97.8048998874619	224.527707410201	251.621197758383	99.8967449998194	272.165760426184	183.105696714032	125.516519846387	181.773144785887	149.517657023682	124.943742284096	310.520328688195
ENSG00000041515	0	0	0	0	0	0	0	0	0	0	8.75057639030337	0	0	0	0	0	0	3.43783006825754	0	0	0	0	0	0	0	0	0	0	0	0	0	0	0
ENSG00000041802	91.2566132221637	21.0546711430929	178.136760872072	189.110232530006	94.1648873981755	69.1943172195843	62.9577605561605	93.9095326550343	96.2060875654108	133.068109540427	111.132320156853	53.4141010385092	96.3669267854023	115.826432359495	82.1367725353948	106.749346935834	66.2797407331934	72.1944314334082	81.2123102944669	154.401166464306	68.8670361529362	37.4803142385243	100.547093342251	91.788056488447	88.1475533548474	49.9483724999097	76.0463154131986	26.8244014294442	89.4305203905511	150.530885525813	8.15550856492811	61.7538036576567	71.2669606825364
ENSG00000041880	95.8194438832719	47.6018651930795	65.9765781007675	33.2998452933271	28.8432988426844	29.6547073798219	48.210897723186	93.2792673352019	43.6447128955278	203.826548740495	49.8782854247292	9.18054861599377	27.5334076529721	0	83.0701449505698	0	29.825883329937	65.3187712968932	17.5960005638012	0.374305858095287	74.921281089458	5.87926497859204	37.4766438821116	40.9515944333071	20.8348762475094	59.4213396981684	8.00487530665248	34.9883496905794	18.3044924775982	57.7508428746829	4.07775428246406	18.6697545941753	15.2714915748292
ENSG00000041982	100.38227454438	4.11939218017034	9.89648671511513	7.81107482189153	12.7249847835372	117.520507023738	4.53749625629986	17.017163635476	129.056946734088	23.2341143642016	42.8778243124865	10.0151439447205	1.3766703826486	13.1124263048484	51.3354828346218	180.652740968335	26.5118962932774	354.526225789058	0.451179501635927	0	24.9737603631527	27.9265086483122	128.883092375067	16.9454873517133	3.20536557653991	151.56747517214	10.6731670755366	33.8220713675601	57.5284049295943	14.2010269363974	25.8257771222724	2.87226993756543	25.4524859580487
ENSG00000041988	4.56283066110819	8.84906468332889	0	33.7109544944792	13.5733171024397	13.1798699465875	20.4187331533494	24.5803474734654	10.793853726851	0.528048053731854	13.125864585455	1.66919065745341	19.9617205484048	0.728468128047135	12.1338413972742	0	3.31398703665967	18.0486078583521	13.0842055474419	6.55035251666752	10.5949286389133	34.5406817492282	45.7032242464775	7.06061972988054	28.8482901888591	14.6400402154908	33.353647111052	4.66511329207726	37.1319704545563	7.57388103274529	8.15550856492811	8.61680981269629	5.09049719160975
ENSG00000042062	22.8141533055409	28.6831751804454	0	16.0332588449353	6.78665855121986	18.6714824243323	23.2546683135368	0	7.03946982185932	35.3792196000342	8.75057639030337	0.834595328726706	13.766703826486	86.6877072376091	8.40035173657447	0	0	27.5026405460603	0	0.187152929047643	4.54068370239139	0	19.1953541835206	9.88486762183276	25.6429246123192	9.47296719825873	10.6731670755366	5.83139161509657	42.8848109475157	21.7749079691427	0	7.18067484391357	91.6289494489754
ENSG00000042088	11.4070766527705	7.78107411809954	36.2871179554221	43.9886845232839	13.5733171024397	18.6714824243323	27.2249775377992	20.1684902346382	10.793853726851	104.553514638907	11.3757493073944	0	8.26002229589163	7.28468128047135	53.2022276649717	0	23.1979092566177	15.8999640656911	72.1887202617484	68.3108191023898	15.8923929583699	15.4330705688041	14.6250317588728	1.41212394597611	36.8617041302089	22.3906497413388	24.0146259199574	6.99766993811588	13.0746374839987	28.4020538727948	74.758828511841	2.87226993756543	0
ENSG00000042286	0	14.6467277517168	0	19.7332416553049	3.39332927560993	7.68825746884271	28.9265386339116	21.4290208743031	9.3859597624791	1.05609610746371	36.7524208392741	0	7.57168710456733	30.5956613779797	14.9339586427991	8.21148822583339	62.9657536965337	3.86755882678973	6.31651302290298	14.9722343238115	9.08136740478279	0.734908122324005	13.7109672739433	21.1818591896416	22.4375590357793	10.3341460344641	2.66829176888416	6.99766993811588	21.9653909731178	1.89347025818632	4.07775428246406	8.61680981269629	40.723977532878
ENSG00000042317	0	0	0	15.6221496437831	6.78665855121986	14.2781924421365	8.50780548056223	22.0592861941356	0.469297988123955	0	11.3757493073944	0	4.13001114794581	0.728468128047135	5.60023449104965	0	0	6.01620261945069	13.5353850490778	0	0	0	0.914064484929551	0	0	11.1953248706694	25.3487718043995	15.1616181992511	4.18388399487958	25.5618484855154	0	1.43613496878271	5.09049719160975
ENSG00000042429	0	30.8191563109041	3.29882890503838	10.2777300288046	20.3599756536596	36.2446423531156	22.6874812814993	5.67238787849201	19.7105155012061	0	14.8759798635157	29.2108365054347	14.4550390178103	31.3241295060268	32.6680345311229	82.1148822583339	0	14.1810490315623	13.9865645507137	27.5114805700036	9.08136740478279	7.34908122324005	0	0	4.80804836480986	22.3906497413388	36.0219388799362	44.3185762747339	31.3791299615969	6.62714590365213	2.71850285497604	18.6697545941753	61.085966299317
ENSG00000042445	221.297287063747	224.278018698163	46.1836046705373	92.4995702592418	200.206427260986	205.386306667655	235.949805327593	144.961023561462	161.907805902764	281.449612639078	223.139697952736	160.242303115528	228.527283519668	242.579886639696	164.27354507079	65.6919058066671	202.15320923624	257.407526360783	242.734571880129	48.285455694292	206.601108458808	117.585299571841	182.81289698591	156.745758003348	57.6965803777183	210.988814870308	140.085317866418	47.8174112437919	187.228808770861	177.986204269514	285.442799772484	74.6790183767012	35.6334803412682
ENSG00000042493	68.4424599166228	39.2105107519918	204.527392112379	22.6110060633702	63.6249239176862	72.4892847062312	72.0327530687603	85.7160834972125	225.263034299498	4.22438442985483	175.011527806067	40.0605757788819	93.6135860201051	90.3300478778448	64.402696647071	98.5378587100006	16.5699351832983	103.99435956479	62.7139507273939	22.2711985566696	84.0026484942408	39.6850386054963	85.0079970984482	64.957701514901	99.3663328727371	53.393087844731	108.065816639809	209.930098143477	87.3385783931113	83.3126913601982	73.399577084353	410.734601071856	127.262429790244
ENSG00000042753	146.010581155462	77.6581711002484	32.9882890503838	59.1997249659148	58.5349300042713	70.2926397151333	77.7046233891351	77.5226343393907	87.7587237791796	18.4816818806149	91.005994459155	100.986034775931	36.481765140188	63.3767271401008	57.8690897408464	188.864229194168	62.9657536965337	84.2268366723096	55.0438991995831	46.4139264038156	49.1907401092401	90.3936990458526	27.4219345478865	91.788056488447	83.3395049900375	77.5060952584805	64.0390024532199	69.9766993811589	76.8788684059123	98.4604534256888	4.07775428246406	96.2210429084419	15.2714915748292
ENSG00000042781	0	0	0	0	0.848332318902482	0	0	6.9329185181569	5.1622778693635	0	0	0	0	0	0	0	0	3.86755882678973	0	0	0	0	0	0	11.2187795178897	0	0	0	0	6.62714590365213	0	1.43613496878271	0
ENSG00000042832	0	0	0	0	0.848332318902482	0	0	0	3.28508591686768	0	4.37528819515168	0	0	0	0	0	0	0	0	0	13.6220511071742	11.0236218348601	0	0	0	6.02825185343738	4.00243765332624	0	2.61492749679974	0	0	2.87226993756543	0
ENSG00000042980	203.045964419314	146.162137355674	75.8730648158827	110.588375109938	111.131533776225	77.980897183976	193.977964956819	116.599084169002	284.863878791241	179.008290215098	226.639928508857	74.2789842566768	160.382099578562	50.9927689632995	197.874952017088	24.6344646775002	49.709805549895	176.188790998199	101.064208366448	70.1823483928663	78.7051841747842	76.4304447216965	61.2423204902799	146.860890381515	155.460230462185	159.318084697988	37.3560847643783	106.131327394758	101.98217237519	124.022301911204	73.399577084353	34.4672392507851	61.085966299317
ENSG00000043039	73.005290577731	1.67827088821755	0	16.0332588449353	6.78665855121986	26.359739893175	2.83593516018741	14.4961023561462	3.28508591686768	13.7292493970282	18.3762104196371	0	7.57168710456733	20.3971075853198	21.4675655490237	90.3263704841673	0	3.00810130972534	14.8889235539856	0	17.4059541925003	7.34908122324005	71.297029824505	14.1212394597611	0	9.47296719825873	14.6756047288629	11.6627832301931	7.32179699103927	17.0412323236769	1.35925142748802	0	183.257898897951
ENSG00000043093	82.1309518999474	22.2752317890693	13.1953156201535	20.1443508564571	35.6299573939043	45.0312223175073	14.7468628329745	45.379103027936	26.7499853230654	1.58414416119556	27.1267868099404	0.834595328726706	15.1433742091347	13.1124263048484	32.6680345311229	254.556135000835	3.31398703665967	21.9161666851418	36.5455396325101	20.3996692661931	52.217862577501	24.9868761590162	21.9375476383092	31.0667268114744	11.2187795178897	17.2235767241068	37.3560847643783	29.1569580754829	64.3272164212736	48.2834915837512	6.79625713744009	68.9344785015703	5.09049719160975
ENSG00000043143	116.352181858259	60.8754622180729	13.1953156201535	54.2664145520885	16.9666463780496	70.2926397151333	19.8515461213119	70.5897158212339	13.1403436674707	78.6791600060462	22.7514986147888	10.8497392734472	50.9368041579984	14.5693625609427	69.0695587229457	8.21148822583339	13.2559481466387	26.2134542704637	39.7037961439616	53.3385847785784	35.5686890020659	35.2755898715522	28.3359990328161	28.2424789195222	35.259021341939	48.226014827499	14.6756047288629	45.4848545977533	40.269883450716	19.8814377109564	88.3513427867212	45.9563190010469	5.09049719160975
ENSG00000043462	143.729165824908	2.7462614534469	277.101628023224	141.832674397504	116.22152768964	129.602054474777	19.2843590892744	21.4290208743031	33.7894551449248	59.6694300716995	64.7542652882449	343.018680106676	18.5850501657562	1.45693625609427	18.6674483034988	295.613576130002	195.52523516292	55.864738609185	48.2762066750442	0.935764645238217	49.9475207263053	565.879254189484	51.1876111560548	162.394253787252	347.78216505458	31.0024381033922	1595.63847779273	304.398642308041	2.61492749679974	73.8453400692666	456.708479635974	1421.77361909489	1298.07678386049
ENSG00000043514	2.28141533055409	0.3051401614941	46.1836046705373	18.4999140518484	2.54499695670745	17.5731599287833	24.3890423776117	35.2948579106169	9.85525775060305	1.58414416119556	7.00046111224269	126.023894637733	27.5334076529721	0	42.9351310980473	0	0	44.691790887348	16.6936415605293	60.4503960823888	12.1084898730437	0	21.9375476383092	8.47274367585665	3.20536557653991	24.1130074137495	1.33414588444208	6.99766993811588	23.0113619718377	30.2955241309812	6.79625713744009	0	45.8144747244877
ENSG00000043591	0	39.6682209942329	6.59765781007675	58.7886157647626	34.7816250750018	34.0479973620177	39.1359052105863	81.3042262583854	10.324555738727	53.3328534269172	7.00046111224269	81.7903422152172	15.831709400459	88.8731116217505	43.8685035132222	0	0	42.1134183361548	37.8990781374179	43.9809383261962	18.9195154266308	5.87926497859204	0	28.2424789195222	36.8617041302089	39.6142264654456	6.6707294222104	26.8244014294442	50.206607938555	63.4312536492418	63.8848170919369	28.7226993756543	20.361988766439
ENSG00000044090	2.28141533055409	0.15257008074705	0	4.52220121267404	0.848332318902482	5.49161247774479	0.567187032037482	17.017163635476	0.469297988123955	0	3.50023055612135	28.376241176708	0	0	3.73348966069977	0	0	3.86755882678973	0	0	0	0	0	0	0	16.3623978879014	0	0	0.522985499359948	7.57388103274529	0	0	0
ENSG00000044115	807.621027016149	409.650666805829	336.480548313914	371.642717841576	460.644449164048	334.988361142432	475.30273284741	352.318313786337	444.894492741509	511.150516012434	344.772709777953	177.768805018788	354.492623532016	287.744910578618	326.680345311229	410.574411291669	579.947731415442	326.593856484466	343.798780246577	574.933798034361	478.285349985227	597.480303449416	496.337015316746	228.76407924813	323.74192323053	227.35121275821	292.177948692816	298.567250692944	537.629093342026	460.113272739277	440.397462506118	149.358036753402	198.52939047278
ENSG00000044446	2.28141533055409	12.6633167020051	0	35.7665005002402	25.4499695670745	29.6547073798219	11.3437406407496	0	21.118409465578	0	4.37528819515168	0	2.75334076529721	34.2380020182154	12.1338413972742	0	9.94196110997901	27.9323693045925	4.51179501635927	51.8413613461972	20.4330766607613	7.34908122324005	11.8828383040842	21.1818591896416	12.8214623061596	43.058941810267	25.3487718043995	12.8290615532125	8.89075348911911	21.7749079691427	1.35925142748802	4.30840490634814	5.09049719160975
ENSG00000044459	2.28141533055409	10.8324757330405	36.2871179554221	80.5774034258284	22.0566402914645	40.6379323353114	56.7187032037482	42.2277764287738	15.4868336080905	90.8242652418788	44.6279395905472	59.2562683395961	17.8967149744319	9.47008566461276	27.0678000400733	0	3.31398703665967	22.7756242022062	37.447898635782	0	3.02712246826093	8.81889746788806	26.507870062957	26.8303549735461	17.6295106709695	22.3906497413388	44.0268141865887	9.33022658415451	7.32179699103927	10.4140864200248	47.5737999620806	40.211779125916	55.9954691077072
ENSG00000044574	942.224531518841	1015.65902753311	1293.14093077504	964.051076701876	896.687261079924	642.51865989614	912.603934548309	1060.73653327801	1582.00351796585	1410.41635151778	1162.07654463229	556.675084260713	793.650475596921	402.114406682019	913.771594456268	706.187987421671	526.923938828887	682.409268549121	555.853146015462	1043.56473236966	566.828682181859	773.858252807177	716.626556184768	889.638085964948	1123.48063457724	1092.83594314458	1204.7337336512	1004.16563611963	624.444686235778	1003.53923683875	829.143370767691	956.465889209288	1002.82794674712
ENSG00000046604	93.5380285527178	156.842043007967	65.9765781007675	131.143835167547	161.183140591472	232.844369056379	115.706154535646	176.474289553085	200.859538917053	143.101022561332	188.137392391522	5.00757197236024	174.837138596373	255.692312944545	97.0707311781939	24.6344646775002	102.73359813645	115.167307286627	50.5321041832239	189.960222983358	59.0288881310881	164.619419400577	129.797156859996	196.285228490679	89.7502361431173	82.6731682757126	69.3755859909882	88.6371525494679	173.631185787503	118.341891136645	9.51475999241613	89.0403680645283	35.6334803412682
ENSG00000046647	0	30.51401614941	0	5.34441961497842	6.78665855121986	8.78657996439166	18.7171720572369	33.4040619511196	27.6885812993133	59.1413820179676	5.25034583418202	0	20.6500557397291	26.953320737744	17.7340758883239	0	0	17.1891503412877	30.6802061112431	0.187152929047643	8.32458678771756	0.734908122324005	0	12.709115513785	16.0268278826995	11.1953248706694	14.6756047288629	26.8244014294442	7.32179699103927	18.9347025818632	0	1.43613496878271	0
ENSG00000046651	189.35747243599	92.4574689327122	19.7929734302303	97.0217714719159	102.6482105872	76.8825746884271	87.9139899658098	126.053063966489	109.815729221005	2.64024026865927	83.130475707882	33.3838131490682	75.028535854349	120.925709255824	96.137358763019	106.749346935834	46.3958185132354	79.0700915699233	39.2526166423257	7.11181130381045	87.786551579567	85.2493421895846	73.1251587943641	77.666817028686	81.7368222017676	35.3083322844189	48.0292518399149	30.3232363985022	80.539766901432	80.4724859729187	9.51475999241613	21.5420245317407	20.361988766439
ENSG00000046653	11.4070766527705	0	6.59765781007675	2.8777644080653	6.78665855121986	1.09832249554896	6.23905735241231	22.0592861941356	8.91666177435514	0.528048053731854	5.25034583418202	0	0	0	6.53360690622459	0	3.31398703665967	14.1810490315623	7.67005152781076	17.9666811885738	24.9737603631527	6.61417310091605	0	14.1212394597611	0	11.1953248706694	8.00487530665248	18.660453168309	10.459709987199	7.57388103274529	1.35925142748802	0	10.1809943832195
ENSG00000047056	0	12.358176540511	39.5859468604605	17.2665864483918	14.4216494213422	7.68825746884271	20.9859201853868	13.2355717164813	0.93859597624791	54.9169975881128	6.12540347321236	25.0378598618012	1.3766703826486	0	17.7340758883239	73.9033940325005	0	31.37019937285	32.9361036194227	0.56145878714293	0.756780617065232	19.1076111804241	1.8281289698591	11.2969915678089	0	8.61178836205339	44.0268141865887	3.49883496905794	1.56895649807984	9.46735129093162	0	5.74453987513086	5.09049719160975
ENSG00000047188	73.005290577731	37.5322398637743	46.1836046705373	48.5108857359579	105.193207543908	54.9161247774479	65.7936957163479	69.9594505014014	80.7192539573202	108.777899068762	30.6270173660618	188.618544292236	70.2101895150788	25.4963844816497	90.5371242719693	65.6919058066671	36.4538574032564	78.2106340528589	64.9698482355735	116.409121867634	79.4619647918494	44.0944873394403	80.4376746738005	84.7274367585665	68.915359895608	62.8660550429898	80.0487530665248	50.1499678898305	81.5857379001519	35.9759349055401	4.07775428246406	27.2865644068716	30.5429831496585
ENSG00000047230	2.28141533055409	38.4476603482565	0	11.9221668334134	3.39332927560993	13.1798699465875	51.6140199154109	21.4290208743031	17.3640255605863	60.7255261791632	10.500691668364	30.8800271628881	3.44167595662151	0.728468128047135	1.86674483034988	8.21148822583339	76.2217018431724	8.16484641211165	49.1785656783161	2.80729393571465	0.756780617065232	36.0104979938762	31.0781924876047	19.7697352436655	6.41073115307981	16.3623978879014	2.66829176888416	25.6581231064249	17.2585214788783	10.4140864200248	125.051131328898	1.43613496878271	10.1809943832195
ENSG00000047249	2.28141533055409	15.7147183169461	3.29882890503838	48.0997765348057	50.0516068152465	25.261417397626	39.7030922426238	34.034327270952	87.7587237791796	117.226667928471	21.0013833367281	4.17297664363353	68.1451839411059	130.395794920437	48.5353655890969	0	56.3377796232144	83.3673791552452	47.8250271734083	105.554251982871	77.1916229406537	74.2257203547245	86.8361260683073	33.8909747034266	75.3260910486878	55.9766243533471	65.3731483376619	34.9883496905794	40.7928689500759	23.668378227329	10.8740114199041	41.6479140946987	0
ENSG00000047315	353.619376235884	262.420538884926	42.8847757654989	179.243611702353	163.728137548179	107.635604563798	153.707685682158	209.248086184372	239.811271931341	392.339703922767	175.011527806067	323.822987545962	234.722300241587	163.176860682558	199.741696847437	246.344646775002	182.269287016282	162.437470725169	263.940008457017	111.543145712395	172.545980690873	153.595797565717	272.391216509006	177.92761719299	190.719251804124	201.515847672049	193.451153244102	141.119677085337	177.815069782382	145.797209880347	150.87690845117	94.7849079396591	55.9954691077072
ENSG00000047346	130.040673841583	126.480596939304	69.2754070058059	155.399278035526	190.026439434156	180.124889270029	142.363945041408	153.784738039117	132.342032650955	165.27904081807	108.507147239762	43.3989570937887	145.927060560752	104.899410438787	63.469324231896	246.344646775002	96.1056240631304	158.140183139847	173.704108129832	86.090347361916	123.355240581633	98.4776883914167	85.0079970984482	128.503279083826	131.419988638136	101.61910267223	77.3804612976407	33.8220713675601	217.561967733738	52.0704321001239	57.0885599544968	63.1899386264394	40.723977532878
ENSG00000047365	223.578702394301	86.8123759450713	161.64261634688	133.61049037446	127.249847835372	144.978569412462	154.274872714195	69.9594505014014	68.0482082779735	175.840001892707	143.509452800975	181.941781662422	158.31709400459	48.8073645791581	64.402696647071	188.864229194168	6.62797407331934	93.6808693600178	60.0068737175783	53.3385847785784	117.300995645111	108.766402103953	89.578319523096	168.042749571157	165.076327191805	72.3390222412485	121.407275484229	67.6441427351202	76.8788684059123	82.3659562311051	69.3218228018889	70.370613470353	40.723977532878
ENSG00000047410	289.73974698037	181.100685846748	352.974692839106	372.876045445033	251.106366395135	208.681274154302	193.410777924781	215.550739382696	207.899008738912	203.826548740495	275.643156294556	311.304057615061	159.005429195914	209.070352749528	277.211607306958	353.093993710836	198.83922219958	268.150745324088	138.060927500594	274.927652770988	203.573985990548	208.713906740017	113.343996131264	223.115583464225	235.594369875683	218.739424396156	909.887493189499	510.82990548246	184.613881274062	228.163166111452	73.399577084353	311.641288225849	427.601764095219
ENSG00000047457	800.776781024487	1141.98705439167	359.572350649183	598.574996877583	449.616129018316	725.991169557861	710.118164110928	821.865977061508	1201.40284959732	773.062350663434	462.030433408018	1024.8830636764	935.447525009727	361.320191511379	649.627200961759	328.459529033335	705.87923880851	676.822794688202	808.964846433218	737.00823458962	589.532100693816	390.971121076371	489.938563922239	417.988688008928	668.31872270857	833.621113446769	266.829176888416	404.698578087702	913.655667381829	421.297132446457	360.201628284325	147.92190178462	351.244306221072
ENSG00000047578	2.28141533055409	1.98341104971165	52.781262480614	46.0442305290448	25.4499695670745	26.359739893175	59.5546383639356	31.5132659916223	4.69297988123955	222.30823062111	9.6256340293337	47.5719337374223	29.598413226945	24.0394482255555	14.0005862276241	0	159.071377759664	32.2296568899144	60.9092327208502	15.1593872528591	40.1093727044573	14.6981624464801	16.4531607287319	21.1818591896416	12.8214623061596	12.9176825430801	26.6829176888416	13.9953398762318	38.1779414532762	63.4312536492418	4.07775428246406	12.9252147190444	239.253368005658
ENSG00000047579	0	83.3032640878892	65.9765781007675	33.7109544944792	24.601637248172	32.9496748664687	30.0609126979866	23.9500821536329	16.8947275724624	70.7584392000684	19.2512680586674	0	75.7168710456733	71.3898765486193	41.0683862676974	0	9.94196110997901	33.518843165511	33.8384626226945	0.56145878714293	65.8399136846752	44.8293954617643	51.1876111560548	21.1818591896416	102.571698449277	47.3648359912937	98.726795448714	41.9860196286953	31.3791299615969	20.8281728400496	29.9035314047364	68.9344785015703	5.09049719160975
ENSG00000047597	25.095568636095	0	0	9.45551162650028	0.848332318902482	0	0	0	0.469297988123955	19.0097299343467	0	72.6097935992234	2.75334076529721	0	3.73348966069977	0	0	0	0.902359003271854	0	0	0	0	1.41212394597611	0	0	0	0	0	7.57388103274529	0	0	5.09049719160975
ENSG00000047621	130.040673841583	14.3415875902227	36.2871179554221	47.6886673336536	37.3266220317092	23.0647724065281	48.210897723186	48.5304296270983	21.118409465578	36.4353157074979	71.7547264004876	20.8648832181677	68.8335191324302	10.927021920707	50.4021104194468	41.0574411291669	0	61.8809412286356	46.9226681701364	35.7462094480999	4.54068370239139	16.1679786911281	15.5390962438024	32.4788507574505	25.6429246123192	24.1130074137495	89.3877742576194	50.1499678898305	18.3044924775982	17.0412323236769	5.43700570995207	5.74453987513086	5.09049719160975
ENSG00000047634	2.28141533055409	0	3.29882890503838	11.099948431109	16.1183140591472	1.09832249554896	7.94061844852475	3.78159191899467	4.22368189311559	8.44876885970966	9.6256340293337	0	7.57168710456733	0	11.2004689820993	0	0	6.87566013651507	2.25589750817964	35.9333623771475	10.5949286389133	0	8.22658036436596	2.82424789195222	0	12.0565037068748	0	25.6581231064249	9.41373898847906	0	1.35925142748802	0	142.533921365073
ENSG00000047644	13.6884919833246	41.1939218017034	79.171893720921	71.1218917993282	54.2932684097589	42.8345773264094	45.9421495950361	68.0686545419041	61.4780364442381	1.58414416119556	26.2517291709101	34.218408477795	30.9750836095936	35.6949382743096	56.9357173256714	221.710182097501	0	50.2782647482665	65.8722072388454	99.0038994662034	37.8390308532616	93.3333315351486	33.8203859423934	29.6546028654983	43.2724352832887	28.4189015947762	150.758484941955	41.9860196286953	47.5916804417553	25.5618484855154	27.1850285497604	211.111840411059	427.601764095219
ENSG00000047648	0	0.15257008074705	26.390631240307	0	8.48332318902482	0	11.3437406407496	11.344775756984	10.324555738727	0	8.75057639030337	0	13.0783686351617	0	11.2004689820993	0	0	4.72701634385411	20.7542570752527	9.73195231047746	8.32458678771756	0.734908122324005	0	1.41212394597611	3.20536557653991	9.47296719825873	13.3414588444208	0	12.0286664852788	7.57388103274529	1.35925142748802	1.43613496878271	5.09049719160975
ENSG00000047849	6.84424599166228	46.076164385609	89.0683804360362	103.188409489199	73.804911744516	85.6691546528187	64.0921346202355	93.2792673352019	131.872734662831	85.0157366508284	135.633934049702	65.9330309694098	66.7685135584573	34.2380020182154	50.4021104194468	16.4229764516668	122.617520356408	98.8376144624041	122.720824444972	192.95466984812	77.1916229406537	109.501310226277	117.000254070983	59.3092057309966	22.4375590357793	51.6707301723204	34.6877929954941	96.8011008106031	74.7869264084725	108.874539845714	14.9517657023682	33.0311042820024	25.4524859580487
ENSG00000047932	61.5982139249605	38.7528005097506	108.861353866266	67.8330181901107	39.8716189884167	58.2110922640948	85.0780548056223	73.7410424203961	57.2543545511225	42.2438442985483	28.8769020880011	86.7979141875774	60.5734968365386	37.880342658451	84.0035173657447	90.3263704841673	43.0818314765757	66.6079575724898	60.4580532192142	81.2243712066772	66.5966943017405	56.5879254189484	148.078446558587	53.6607099470921	88.1475533548474	34.4471534482136	29.3512094577258	75.8080909962554	39.746897951356	68.1649292947076	59.8070628094728	17.2336196253926	15.2714915748292
ENSG00000048028	0	28.2254649382042	13.1953156201535	23.8443336668268	64.4732562365887	20.8681274154302	34.0312219222489	8.19344915782179	32.3815611805529	1.05609610746371	18.3762104196371	0.834595328726706	24.0917316963506	0	43.8685035132222	8.21148822583339	0	17.6188790998199	6.76769252453891	14.7850813947638	46.9203982580444	1.46981624464801	0	28.2424789195222	6.41073115307981	36.1695111206243	0	11.6627832301931	14.6435939820785	36.9226700346333	131.847388466338	31.5949693132197	0
ENSG00000048052	27.3769839666491	55.5355093919261	0	11.5110576322612	16.1183140591472	37.3429648486646	41.4046533387362	54.8330828254227	42.7061169192799	72.8706314149958	29.7519597270314	74.2789842566768	49.5601337753498	52.4497052193937	38.2682690221726	0	59.651766659874	30.5107418557856	24.3636930883401	69.0594308185804	59.7856687481534	22.7821517920442	19.1953541835206	66.3698254608771	84.9421877783075	3.44471534482136	38.6902306488203	5.83139161509657	16.7355359795183	21.7749079691427	2.71850285497604	33.0311042820024	25.4524859580487
ENSG00000048140	109.507935866596	73.3862088393309	105.562524961228	20.5554600576093	19.5116433347571	42.8345773264094	79.4061844852475	40.9672457891089	53.4999706461309	0.528048053731854	85.755648624973	9.18054861599377	33.7284243748908	42.2511514267339	57.8690897408464	0	6.62797407331934	82.5079216381808	27.0707700981556	54.4615023528642	35.5686890020659	4.40944873394403	132.539350314785	45.1879662712355	94.5582845079272	69.7554857326325	30.6853553421678	38.4871846596374	84.2006653969516	87.0996318765709	74.758828511841	12.9252147190444	10.1809943832195
ENSG00000048162	50.1911372721901	21.0546711430929	29.6894601453454	6.16663801728279	27.1466342048794	16.4748374332344	19.8515461213119	23.9500821536329	45.0526068598997	11.6170571821008	46.3780548686078	1.66919065745341	37.8584355228366	61.1913227559594	27.0678000400733	16.4229764516668	33.1398703665967	17.1891503412877	16.2424620588934	63.8191488052464	29.5144440655441	24.2519680366922	6.39845139450686	11.2969915678089	11.2187795178897	32.7247957758029	36.0219388799362	51.3162462128498	30.333158962877	24.6151133564222	43.4960456796166	51.7008588761777	0
ENSG00000048342	22.8141533055409	0.15257008074705	92.3672093410745	58.7886157647626	7.63499087012234	0	35.7327830183614	100.842451173191	8.91666177435514	153.133935582238	0.875057639030337	115.174155364285	0	0	60.6692069863712	0	3.31398703665967	18.9080653754164	18.0471800654371	191.270293486692	4.54068370239139	0.734908122324005	39.3047728519707	39.539470487331	0	17.2235767241068	5.33658353776832	10.4965049071738	2.09194199743979	34.0824646473538	4.07775428246406	5.74453987513086	20.361988766439
ENSG00000048392	22.8141533055409	115.037840883276	62.6777491957291	72.7663286039369	42.4166159451241	71.3909622106823	30.628099730024	92.6490020153694	66.6403143136016	103.497418531443	40.2526513953955	15.0227159170807	30.2867484182693	53.1781733474409	93.3372415174941	0	112.675559246429	106.572732115984	28.4243086030634	53.3385847785784	28.7576634484788	74.2257203547245	42.0469663067593	74.8425691367337	32.053655765399	55.9766243533471	85.3853366042931	55.9813595049271	58.0513904289542	71.9518698110803	43.4960456796166	100.52944781479	35.6334803412682
ENSG00000048405	84.4123672305015	32.1922870376275	59.3789202906908	50.1553225405667	23.7533049292695	27.4580623887239	35.1655959863239	38.4461845097792	69.4561022423453	45.9401806746713	93.631167376246	36.7221944639751	22.0267261223777	13.8408944328956	62.5359518167211	8.21148822583339	6.62797407331934	33.9485719240432	65.4210277372094	0.748611716190574	9.83814802184802	2.20472436697202	3.6562579397182	22.5939831356177	27.2456074005892	18.9459343965175	38.6902306488203	69.9766993811589	36.6089849551963	57.7508428746829	16.3110171298562	33.0311042820024	10.1809943832195
ENSG00000048471	0	38.9053705904977	141.84964291665	16.4443680460874	8.48332318902482	32.9496748664687	22.6874812814993	6.9329185181569	17.3640255605863	0	10.500691668364	0.834595328726706	24.7800668876749	6.55621315242422	36.4015241918227	49.2689293550003	205.4671962729	9.45403268770822	1.35353850490778	96.7580643176316	26.4873215972831	15.4330705688041	13.7109672739433	12.709115513785	4.80804836480986	15.5012190516961	18.6780423821891	38.4871846596374	16.2125504801584	28.4020538727948	4.07775428246406	45.9563190010469	15.2714915748292
ENSG00000048544	82.1309518999474	108.172187249658	65.9765781007675	103.599518690351	96.709884354883	112.028894545994	108.899910151197	108.405635011181	125.77186081722	2.11219221492741	119.007838908126	85.128723530124	50.9368041579984	61.9197908840065	42.0017586828724	16.4229764516668	16.5699351832983	70.9052451578117	150.6939535464	91.8920881623929	39.3525920873921	80.8398934556405	54.843869095773	146.860890381515	99.3663328727371	71.4778434050432	28.0170635732837	75.8080909962554	103.55112887327	92.7800426511298	8.15550856492811	63.1899386264394	30.5429831496585
ENSG00000048649	216.734456402639	169.963069952213	527.81262480614	191.165778535766	162.879805229277	216.369531623145	191.709216828669	189.709861269566	139.381502472815	110.362043229957	214.389121562432	387.252232529192	177.59047936167	171.190010091077	170.807151977014	369.516970162502	235.293079602837	214.004921749032	134.00031198587	170.496318362403	202.817205373482	160.944878788957	107.859609221687	211.818591896416	214.759493628174	180.847555603121	258.824301581764	264.745179325384	174.677156786223	153.371090913092	269.131782642628	208.239570473494	234.162870814048
ENSG00000048707	392.403436855304	149.213538970615	250.710996782917	208.021255783006	118.766524646348	166.945019323442	213.262324046093	175.844024233252	97.6139815297826	246.070393039044	126.008300020368	188.618544292236	169.330457065778	166.819201322794	156.80656574939	41.0574411291669	215.409157382879	197.245500166276	184.98359567073	148.412272734781	133.193388603481	97.0078721467687	220.289540868022	114.382039624065	100.969015661007	247.158325990932	210.795049741849	120.126667270989	114.010838860469	167.57211784949	62.5255656644488	130.688282159227	498.868724777755
ENSG00000048740	237.267194377626	49.7378463235382	326.584061598799	142.654892799808	61.0799269609787	197.698049198812	66.3608827483854	38.4461845097792	76.4955720642047	54.9169975881128	106.757031961701	166.084470416615	53.6901449232956	10.1985537926599	64.402696647071	468.054828872503	96.1056240631304	63.1701275042322	73.5422587666561	14.9722343238115	74.921281089458	313.80576823235	61.2423204902799	142.624518543587	104.174381237547	26.6965439223655	651.063191607735	237.92077789594	28.2412169654372	61.5377833910555	376.512645414181	716.631349422575	890.837008531706
ENSG00000048828	577.198078630186	548.031730043403	131.953156201535	443.175718842056	378.356214230507	381.117905955488	441.838697957199	635.307442391105	535.938302437557	366.465349289906	350.023055612135	386.417637200465	276.71074691237	485.159773279392	552.556469783565	492.689293550003	304.88680737269	442.190892529626	421.401654527956	334.442284208139	392.01235963979	402.729651033555	498.165144286605	389.746209089406	432.724352832887	453.841246680214	466.951059554728	457.181102623571	518.278629865708	483.781650966606	478.456502475782	587.37920223213	600.67866860995
ENSG00000048991	0	11.5953261367758	0	23.4332244656746	32.2366281182943	5.49161247774479	18.7171720572369	34.6645925907845	34.2587531330487	1.05609610746371	24.5016138928494	1.66919065745341	24.0917316963506	0	5.60023449104965	0	0	24.9242679948671	10.3771285376263	0.187152929047643	24.9737603631527	0	10.9687738191546	18.3576112976894	27.2456074005892	4.3058941810267	6.6707294222104	26.8244014294442	16.7355359795183	22.7216430982359	1.35925142748802	12.9252147190444	61.085966299317
ENSG00000049089	0	0	0	3.69998281036967	0	13.1798699465875	14.1796758009371	0	2.81578792874373	0	0	0	0	29.8671932499326	6.53360690622459	0	0	4.29728758532192	5.86533352126705	0	0	0	0	4.23637183792833	3.20536557653991	1.72235767241068	4.00243765332624	1.16627832301931	1.0459709987199	8.52061616183845	0	1.43613496878271	0
ENSG00000049130	2.28141533055409	12.5107466212581	3.29882890503838	21.7887876610659	67.0182531932961	10.9832249554896	44.2405884989236	22.0592861941356	29.5657732518092	44.8840845672076	30.6270173660618	2.50378598618012	35.7934299488637	108.541751079023	13.0672138124492	49.2689293550003	3.31398703665967	39.1053170264295	33.3872831210586	56.5201845723883	1.51356123413046	0	48.4454177012662	28.2424789195222	41.6697524950188	12.0565037068748	8.00487530665248	3.49883496905794	10.459709987199	7.57388103274529	1.35925142748802	1.43613496878271	10.1809943832195
ENSG00000049167	0	21.359811304587	0	9.86662082765246	0.848332318902482	0	7.37343141648727	13.2355717164813	1.40789396437186	0	24.5016138928494	0	0	8.01314940851849	0	0	13.2559481466387	7.73511765357946	27.5219495997916	0	15.1356123413046	0.734908122324005	0	8.47274367585665	3.20536557653991	2.58353650861602	1.33414588444208	11.6627832301931	0.522985499359948	1.89347025818632	2.71850285497604	1.43613496878271	30.5429831496585
ENSG00000049192	0	0	0	0	0	2.19664499109792	0	0	0.469297988123955	0	4.37528819515168	1.66919065745341	0	0	0	0	3.31398703665967	4.29728758532192	0	0	0.756780617065232	0	0	0	0	0	0	0	0	9.46735129093162	0	1.43613496878271	132.352926981853
ENSG00000049239	193.920303097098	220.006056437246	194.630905397264	124.566087949112	173.059793056106	173.534954296735	132.154578464733	123.532002687159	192.881473118945	154.190031689701	84.8805909859426	142.715801212267	107.380289846591	138.408944328956	184.807738204638	312.036552581669	92.7916370264708	137.083473971769	349.212934266208	66.8135956700087	112.76031194272	91.1286071681766	198.351993229713	197.697352436655	185.911203439315	234.240643447852	65.3731483376619	82.8057609343713	291.302923143491	127.809242427577	168.547177008514	114.890797502617	178.167401706341
ENSG00000049245	0	73.538778920078	42.8847757654989	41.1109201152186	43.2649482640266	76.8825746884271	25.5234164416867	35.2948579106169	32.3815611805529	1.58414416119556	30.6270173660618	51.7449103810558	26.8450724616478	56.8205139876766	31.734662115948	139.595299839168	16.5699351832983	31.37019937285	43.313232157049	52.5899730623878	84.759429111306	107.296585859305	45.7032242464775	72.0183212447815	52.8885320129084	36.1695111206243	117.404837830903	67.6441427351202	64.3272164212736	38.8161402928196	59.8070628094728	47.3924539698296	193.43889328117
ENSG00000049246	45.6283066110819	52.7892479384792	6.59765781007675	100.310645081133	96.709884354883	25.261417397626	36.8671570824363	56.7238787849201	51.1534807055111	44.8840845672076	31.5020750050921	119.347132007919	35.7934299488637	126.753454280202	73.7364207988204	0	49.709805549895	57.5836536433137	59.1045147143065	0.374305858095287	58.2721075140229	20.5774274250721	42.0469663067593	22.5939831356177	12.8214623061596	70.6166645688378	16.009750613305	65.3115860890816	20.396434475038	36.9226700346333	173.984182718466	50.264723907395	15.2714915748292
ENSG00000049247	4.56283066110819	0	36.2871179554221	0	0.848332318902482	0	0	0	0	0	0	0	0	0.728468128047135	0	0	0	0.429728758532192	4.9629745179952	0	0.756780617065232	0.734908122324005	0	0	6.41073115307981	0	1.33414588444208	0	0	0	2.71850285497604	14.3613496878271	0
ENSG00000049249	0	0.15257008074705	0	0	5.93832623231738	6.58993497329375	0	0	0	0	1.75011527806067	2.50378598618012	0.688335191324302	0	0	65.6919058066671	0	1.28918627559658	0	0	0	24.9868761590162	0	1.41212394597611	9.61609672961972	0	38.6902306488203	3.49883496905794	0	0.946735129093162	0	66.0622085640049	5.09049719160975
ENSG00000049283	77.5681212388392	42.2619123669328	3.29882890503838	34.5331728967836	90.7715581225656	35.1463198575667	80.5405585493225	30.8830006717898	38.0131370380403	201.714356525568	41.1277090344258	136.87363391118	43.365117053431	166.090733194747	57.8690897408464	0	169.013338869643	91.9619543258891	99.259490359904	17.4052224014308	101.408602686741	63.9370066421884	140.765930679151	29.6546028654983	35.259021341939	55.1154455171417	9.33902119109456	18.660453168309	66.9421439180733	72.8986049401734	2.71850285497604	30.158834344437	30.5429831496585
ENSG00000049323	6.84424599166228	6.25537331062904	6.59765781007675	19.7332416553049	15.2699817402447	24.1630949020771	32.3296608261365	22.0592861941356	19.7105155012061	0	0	0	13.766703826486	2.18540438414141	20.5341931338487	139.595299839168	89.4776499898111	24.0648104778027	28.8754881046993	0.56145878714293	5.29746431945663	8.08398934556405	0.914064484929551	22.5939831356177	1.60268278826995	7.75060952584805	2.66829176888416	37.3209063366181	25.6262894686374	9.46735129093162	4.07775428246406	21.5420245317407	20.361988766439
ENSG00000049449	34.2212299583114	35.7013988948097	0	2.46665520691312	17.8149786969521	1.09832249554896	24.3890423776117	5.04212255865956	31.9122631924289	0.528048053731854	8.75057639030337	55.0832916959626	23.4033965050263	26.953320737744	11.2004689820993	0	39.767844439916	26.6431830289959	30.6802061112431	32.003150867147	7.56780617065232	21.3123355473961	2.74219345478865	21.1818591896416	14.4241450944296	21.5294709051335	0	44.3185762747339	9.93672448783901	10.4140864200248	1.35925142748802	1.43613496878271	0
ENSG00000049540	0	0	0	0	0	0	0	0	0	0	0	0	0	0	0	0	0	2.57837255119315	0	0	0	0	0	0	0	0.861178836205339	0	6.99766993811588	0	0	0	4.30840490634814	0
ENSG00000049541	0	10.9850458137876	9.89648671511513	4.52220121267404	1.69666463780496	6.58993497329375	5.10468328833734	2.52106127932978	21.5877074537019	4.75243248358668	24.5016138928494	17.5265019032608	23.4033965050263	16.026298817037	21.4675655490237	73.9033940325005	6.62797407331934	19.7675228924808	26.1684110948838	0.187152929047643	9.83814802184802	25.7217842813402	10.0547093342251	16.9454873517133	1.60268278826995	11.1953248706694	22.6804800355154	23.3255664603863	23.5343474711977	8.52061616183845	2.71850285497604	15.7974846566099	101.809943832195
ENSG00000049618	107.226520536042	146.772417678662	26.390631240307	168.554772472396	110.283201457323	83.4725096617208	83.3764937095099	94.5397979748668	38.4824350261643	101.913274370248	55.1286312589112	155.234731143167	142.485384604131	115.097964231447	73.7364207988204	16.4229764516668	231.979092566177	110.010562184241	60.4580532192142	59.8889372952459	63.5695718334795	38.9501304831723	137.109672739433	112.969915678089	64.1073115307981	72.3390222412485	46.6951059554728	134.122007147221	132.315331338067	92.7800426511298	82.9143370767691	68.9344785015703	279.977345538536
ENSG00000049656	367.307868219209	190.102320610824	42.8847757654989	194.865761346136	179.846451607326	215.271209127596	234.815431263518	189.709861269566	262.337575361291	310.49225559433	193.387738225704	47.5719337374223	205.812222205966	239.666014127508	222.142634811636	139.595299839168	271.746937006093	252.250781258397	267.549444470105	296.637392540515	202.060424756417	176.377949357761	325.40695663492	206.170096112512	197.129982957204	258.353650861602	110.734108408693	82.8057609343713	243.188257202376	159.051501687651	333.016599734565	201.05889562958	66.1764634909267
ENSG00000049759	9.12566132221637	108.629897491899	89.0683804360362	196.510198150745	122.159853921957	142.781924421365	144.065506137521	138.658370363138	124.833264840972	156.830271958361	81.3803604298213	244.536431316925	106.003619463943	227.282055950706	84.0035173657447	156.018276290834	169.013338869643	137.513202730301	166.936415605293	186.217164402405	138.490852922938	84.5144340672606	148.992511043517	149.685138273467	121.803891908516	132.621540775622	46.6951059554728	95.6348224875838	151.665794814385	147.690680138533	20.3887714123203	107.710122658704	269.796351155317
ENSG00000049769	0	0.15257008074705	0	7.81107482189153	0	0	9.6421795446372	0.630265319832445	2.34648994061977	30.6267871164475	0	0	11.7016982525131	0	0.933372415174941	0	36.4538574032564	2.14864379266096	3.15825651145149	0.187152929047643	34.8119083850007	5.87926497859204	47.5313532163366	0	0	0.861178836205339	1.33414588444208	23.3255664603863	0.522985499359948	22.7216430982359	1.35925142748802	0	0
ENSG00000049860	406.091928838629	238.009325965398	92.3672093410745	54.2664145520885	110.283201457323	164.748374332344	178.096728059769	103.993777772353	141.727992413434	457.289614531785	140.009222244854	169.422851731521	173.460468213724	108.541751079023	234.27647620891	49.2689293550003	115.989546283088	299.091215938406	154.303389559487	176.672365020975	76.4348423235885	141.837267608533	140.765930679151	144.036642489563	149.049499309106	198.932311163433	68.0414401065461	90.9697091955065	186.182837772141	109.821274974807	413.212433956358	152.230306690968	15.2714915748292
ENSG00000049883	0	0	0	9.45551162650028	2.54499695670745	0	0	3.78159191899467	4.69297988123955	0	1.75011527806067	0	0	0	5.60023449104965	8.21148822583339	0	11.172947721837	12.18184654417	0	0	0	0	12.709115513785	0	0	0	4.66511329207726	13.0746374839987	17.0412323236769	0	0	0
ENSG00000050030	0	7.78107411809954	0	32.4776268910227	11.8766524646348	3.29496748664687	5.67187032037482	0.630265319832445	0	33.7950754388386	4.37528819515168	0	0.688335191324302	0	4.66686207587471	0	0	0	38.3502576390538	36.3076682352428	0.756780617065232	0	0.914064484929551	21.1818591896416	3.20536557653991	13.7788613792854	0	5.83139161509657	0	10.4140864200248	0	0	0
ENSG00000050130	52.4725526027442	46.8390147893443	3.29882890503838	37.8220465060011	55.1416007286614	19.7698049198812	78.83899745321	57.3541441047525	42.7061169192799	101.385226316516	38.5025361173348	107.662797405745	39.9234410968095	83.7738347254206	64.402696647071	0	26.5118962932774	102.275444530662	96.1012338484525	78.9785360581055	38.5958114703269	21.3123355473961	107.859609221687	49.4243381091638	27.2456074005892	61.1436973705791	41.3585224177045	37.3209063366181	58.0513904289542	21.7749079691427	2.71850285497604	70.370613470353	106.900441023805
ENSG00000050165	0	0	32.9882890503838	0	0	0	0	0	5.1622778693635	0	0	0	2.75334076529721	0	22.4009379641986	0	0	1.28918627559658	0	0	0.756780617065232	0	0	0	0	0	0	0	0	0	0	0	0
ENSG00000050327	63.8796292555146	57.5189204416378	82.4707226259594	28.777644080653	41.5682836262216	50.5228347952521	43.1062144348487	60.5054707039147	66.6403143136016	85.0157366508284	25.3766715318798	11.6843346021739	27.5334076529721	36.4234064023568	52.2688552497967	0	59.651766659874	60.5917549530391	45.1179501635927	11.042022813811	51.4610819604358	78.6351690886685	17.3672252136615	32.4788507574505	67.312677107338	55.1154455171417	36.0219388799362	45.4848545977533	87.8615638924712	59.6443131328692	70.681074229377	30.158834344437	25.4524859580487
ENSG00000050344	18.2513226444327	16.0198584784402	42.8847757654989	26.7220980748921	33.9332927560993	29.6547073798219	10.7765536087122	15.1263676759787	50.6841827173871	0	64.7542652882449	0.834595328726706	47.4951282013769	88.1446434937034	28.9345448704232	0	13.2559481466387	12.0324052389014	10.3771285376263	31.8159979380994	43.1364951727182	0.734908122324005	13.7109672739433	16.9454873517133	25.6429246123192	56.8378031895524	8.00487530665248	4.66511329207726	8.89075348911911	15.1477620654906	42.1367942521286	20.105889562958	0
ENSG00000050393	18.2513226444327	30.51401614941	98.9648671511513	71.5330010004803	24.601637248172	13.1798699465875	13.6124887688996	17.6474289553085	15.0175356199666	56.5011417493083	48.1281701466685	107.662797405745	70.8985247064031	179.203159499595	35.4681517766478	0	3.31398703665967	54.5755523335884	48.2762066750442	10.480564026668	31.7847859167398	120.524932061137	18.281289698591	21.1818591896416	46.4778008598286	21.5294709051335	8.00487530665248	13.9953398762318	32.4251009603168	53.9639023583102	1.35925142748802	22.9781595005234	157.805412939902
ENSG00000050405	716.364413793985	521.78967615491	79.171893720921	289.420877611139	470.824436990878	445.918933192877	461.123057046473	451.269969000031	544.385666223788	283.033756800274	299.269712548375	413.959283048446	631.203370444385	499.729135840335	555.35658702909	131.383811613334	457.330211059034	474.42054941954	536.001247943482	237.309914032412	322.388542869789	167.559051889873	350.086697728018	381.273465413549	413.492159373648	710.472539869405	185.446277937449	255.41495274123	543.381933834986	337.037705957166	251.461514085283	129.252147190444	86.5384522573657
ENSG00000050426	0	0	46.1836046705373	11.5110576322612	17.8149786969521	18.6714824243323	34.0312219222489	0	7.03946982185932	0.528048053731854	14.0009222244854	66.7676262981365	30.9750836095936	0	10.2670965669244	0	3.31398703665967	15.4702353071589	10.8283080392623	0.56145878714293	18.1627348095656	8.81889746788806	13.7109672739433	8.47274367585665	8.01341394134976	36.1695111206243	0	6.99766993811588	23.0113619718377	53.0171672292171	1.35925142748802	27.2865644068716	10.1809943832195
ENSG00000050438	0	0.15257008074705	72.5742359108443	53.8553053509363	2.54499695670745	1.09832249554896	27.7921645698366	46.6396336676009	25.3420913586936	0	7.00046111224269	33.3838131490682	0.688335191324302	0.728468128047135	16.8007034731489	65.6919058066671	0	7.30538889504726	11.7306670425341	20.7739751242884	12.1084898730437	0	0	9.88486762183276	1.60268278826995	33.5859746120082	0	9.33022658415451	0	24.6151133564222	1.35925142748802	0	188.348396089561
ENSG00000050628	0	0	0	0	0	3.29496748664687	0	6.30265319832445	11.2631517149749	0	0	0	0	0	3.73348966069977	0	0	3.43783006825754	0	0	18.9195154266308	0	4.57032242464775	0	0	0.861178836205339	0	0	1.0459709987199	0	21.7480228398083	0	0
ENSG00000050730	77.5681212388392	50.3481266465264	23.0918023352686	31.2442992875661	0.848332318902482	9.88490245994062	5.10468328833734	22.0592861941356	10.793853726851	2.11219221492741	82.2554180688516	61.7600543257763	24.0917316963506	0	0.933372415174941	65.6919058066671	76.2217018431724	5.1567451023863	0	0	12.1084898730437	16.9028868134521	2.74219345478865	0	116.995843543707	0.861178836205339	116.070691946461	2.33255664603863	9.41373898847906	10.4140864200248	28.5442799772484	18.6697545941753	5.09049719160975
ENSG00000050748	0	40.7362115594623	0	30.8331900864139	24.601637248172	9.88490245994062	39.7030922426238	27.7316740726276	14.5482376318426	39.0755559761572	22.7514986147888	49.2411243948757	33.0400891835665	18.9401713292255	26.1344276248984	0	23.1979092566177	26.2134542704637	23.4613340850682	0.374305858095287	18.9195154266308	0.734908122324005	29.2500635177456	21.1818591896416	25.6429246123192	18.0847555603121	44.0268141865887	17.4941748452897	36.6089849551963	43.5498159382854	4.07775428246406	11.4890797502617	0
ENSG00000050820	43.3468912805278	28.8357452611924	26.390631240307	43.9886845232839	38.1749543506117	73.5876072017802	78.83899745321	43.4883070684387	74.1490821235849	168.447329140461	52.5034583418202	5.84216730108694	77.7818766196462	118.740304871683	44.8018759283972	0	13.2559481466387	70.4755163992795	134.902670989142	85.528888574773	96.1111383672845	92.5984234128246	133.453414799714	70.6061972988054	49.6831664363685	86.1178836205339	38.6902306488203	61.8127511200236	81.5857379001519	74.7920751983598	61.1663142369608	40.211779125916	25.4524859580487
ENSG00000051009	18.2513226444327	41.6516320439446	65.9765781007675	46.8664489313492	67.0182531932961	41.7362548308604	49.345271787261	46.6396336676009	17.3640255605863	51.2206612119898	27.1267868099404	117.677941350466	10.3250278698645	21.1255757133669	56.0023449104965	8.21148822583339	82.8496759164917	63.1701275042322	68.5792842486609	144.107755366685	31.0280052996745	27.1916005259882	98.7189643723915	28.2424789195222	32.053655765399	43.058941810267	54.6999812621253	47.8174112437919	29.810173463517	26.5085836146085	61.1663142369608	99.0933128460073	45.8144747244877
ENSG00000051108	184.794641774882	119.767513386434	69.2754070058059	122.099432742199	97.5582166737855	96.6523796083083	116.840528599721	141.179431642468	105.122749339766	140.988830346405	131.25864585455	194.460711593323	76.4052062369976	94.7008566461276	190.407972695688	24.6344646775002	192.211248126261	94.5403268770822	184.081236667458	276.237723274322	123.355240581633	180.787398091705	196.523864259853	128.503279083826	113.790477967167	148.983938663524	234.809675661806	72.3092560271975	75.8328974071924	93.726777780223	39.4182913971525	228.345460036452	117.081435407024
ENSG00000051128	6.84424599166228	121.903494516893	46.1836046705373	71.5330010004803	61.0799269609787	166.945019323442	113.437406407496	85.0858181773801	181.618321403971	98.7449860478566	138.259106966793	5.84216730108694	119.081988099104	206.156480237339	118.538296727218	16.4229764516668	172.327325906303	127.199712525529	36.0943601308742	14.4107755366685	92.3272352819584	85.2493421895846	223.94579880774	124.266907245898	70.5180426838779	269.548975732271	76.0463154131986	64.1453077660623	146.435939820785	91.8333075220367	85.6328399317452	40.211779125916	45.8144747244877
ENSG00000051180	0	0	0	6.57774721843497	0	0	6.80624438444979	0	0	0	6.12540347321236	0	0	0	0	0	0	8.59457517064384	0	0	0.756780617065232	0	0	4.23637183792833	3.20536557653991	6.88943068964271	0	0	1.0459709987199	0	0	18.6697545941753	0
ENSG00000051341	2.28141533055409	0	6.59765781007675	23.4332244656746	13.5733171024397	6.58993497329375	9.6421795446372	23.3198168338005	15.4868336080905	0	7.87551875127303	40.0605757788819	0	10.1985537926599	5.60023449104965	0	0	10.7432189633048	9.02359003271854	0.187152929047643	5.29746431945663	0	0	4.23637183792833	0	14.6400402154908	0	8.1639482611352	0	11.3608215491179	0	0	0
ENSG00000051382	36.5026452888655	30.3614460686629	49.4824335755756	19.3221324541527	27.9949665237819	21.9664499109792	29.4937256659491	49.7909602667632	25.3420913586936	94.5206016180018	42.8778243124865	99.316844118478	11.0133630611888	37.880342658451	31.734662115948	0	195.52523516292	23.2053529607384	11.2794875408982	50.905596700959	29.5144440655441	47.0341198287363	46.6172887314071	56.4849578390443	27.2456074005892	39.6142264654456	14.6756047288629	9.33022658415451	19.873448975678	11.3608215491179	23.1072742672963	15.7974846566099	15.2714915748292
ENSG00000051523	15.9699073138787	101.459103696788	257.308654592993	23.4332244656746	51.7482714530514	59.3094147596437	58.9874513318982	75.6318383798934	35.6666470974206	111.946187391153	52.5034583418202	62.594649654503	34.4167595662151	20.3971075853198	39.2016414373475	180.652740968335	3.31398703665967	31.37019937285	60.4580532192142	12.7263991752398	24.9737603631527	182.992122458677	18.281289698591	70.6061972988054	115.393160755437	67.1719492240165	178.775548515239	51.3162462128498	32.4251009603168	93.726777780223	2.71850285497604	208.239570473494	183.257898897951
ENSG00000051596	0	26.5471940499867	0	13.5666036380221	33.0849604371968	3.29496748664687	19.2843590892744	5.67238787849201	14.0789396437186	32.7389793313749	18.3762104196371	0.834595328726706	12.3900334438374	5.09927689632995	13.0672138124492	0	0	28.3620980631247	21.6566160785245	18.902445833812	12.1084898730437	0.734908122324005	42.9610307916889	16.9454873517133	28.8482901888591	25.8353650861602	0	15.1616181992511	26.6722604673573	15.1477620654906	1.35925142748802	7.18067484391357	0
ENSG00000051620	602.293647266281	463.35533522879	475.031362325526	409.875873548729	564.989324389053	356.954811053411	366.402822696214	498.539867987464	391.394522095378	183.232674644953	728.04795567324	383.913851214285	589.214923773603	538.337946626833	365.881986748577	287.402087904169	477.214133278992	324.015483933273	229.199186831051	246.667560484794	371.579282979029	313.80576823235	281.531861358302	447.643290874426	480.804836480986	513.262586378382	759.129008247544	534.155471942846	421.526312484118	372.066905733612	252.820765512771	254.19588947454	244.343865197268
ENSG00000051825	0	0.3051401614941	0	11.9221668334134	11.8766524646348	10.9832249554896	6.23905735241231	21.4290208743031	2.81578792874373	31.6828832239112	17.5011527806067	0.834595328726706	23.4033965050263	0	17.7340758883239	0	3.31398703665967	4.72701634385411	0	13.2878579623827	12.865270490109	0	0.914064484929551	1.41212394597611	19.2321934592394	0.861178836205339	20.0121882666312	3.49883496905794	14.1206084827186	2.84020538727948	0	0	5.09049719160975
ENSG00000052126	120.915012519367	70.9450875473782	164.941445251919	131.143835167547	153.548149721349	88.9641221394656	118.542089695834	82.5647568980503	107.469239280386	83.4315924896329	90.1309368201247	291.27376972562	101.185273124672	44.4365558108753	107.337827745118	123.172323387501	6.62797407331934	139.23211776443	84.3705668059184	118.093498229063	71.8941586211971	83.0446178226126	126.140898920278	74.8425691367337	56.0938975894483	152.428654008345	33.353647111052	43.1522979517146	163.694461299664	76.6855454565461	10.8740114199041	45.9563190010469	152.714915748292
ENSG00000052344	127.759258511029	97.0345713551237	118.757840581382	113.055030316851	167.969799142691	121.913797005934	86.7796159017348	22.689551513968	51.622778693635	48.0523728895987	113.757493073944	77.6173655715837	175.525473787697	160.991456298417	53.2022276649717	287.402087904169	255.177001822795	67.4674150895541	66.7745662421172	17.4052224014308	136.220511071742	178.582673724733	141.67999516408	108.73354384016	88.1475533548474	37.8918687930349	148.090193173071	117.794110624951	144.343997823346	80.4724859729187	129.128885611362	87.6042330957456	147.624418556683
ENSG00000052723	11.4070766527705	0.15257008074705	75.8730648158827	16.8554772472396	33.0849604371968	28.5563848842729	31.1952867620615	5.67238787849201	33.7894551449248	0.528048053731854	28.0018444489708	74.2789842566768	61.9501672191872	0.728468128047135	15.867331057974	49.2689293550003	23.1979092566177	15.4702353071589	9.02359003271854	12.7263991752398	12.1084898730437	44.8293954617643	25.5938055780274	33.8909747034266	43.2724352832887	30.1412592671869	12.0073129599787	16.3278965222704	30.8561444622369	29.348789001888	2.71850285497604	20.105889562958	173.076904514731
ENSG00000052749	22.8141533055409	12.205606459764	3.29882890503838	23.8443336668268	18.6633110158546	25.261417397626	39.7030922426238	12.6053063966489	1.40789396437186	12.6731532895645	27.1267868099404	3.33838131490682	8.26002229589163	0	36.4015241918227	164.229764516668	3.31398703665967	22.345895443674	17.1448210621652	51.2799025590543	21.1898572778265	0	10.0547093342251	25.4182310275699	4.80804836480986	26.6965439223655	76.0463154131986	9.33022658415451	0	24.6151133564222	27.1850285497604	183.825276004187	25.4524859580487
ENSG00000052795	193.920303097098	103.4425147465	112.160182771305	35.355391299088	47.506609858539	65.8993497329375	91.8842991900721	49.1606949469307	81.1885519454442	23.7621624179334	28.0018444489708	235.355882700931	18.5850501657562	115.826432359495	70.0029311381206	24.6344646775002	109.361572209769	91.9619543258891	155.656928064395	1.68437636142879	50.7043013433706	66.1417310091605	105.117415766898	79.0789409746621	72.1207254721479	43.058941810267	56.0341271465674	47.8174112437919	73.2179699103927	40.709610551006	5.43700570995207	147.92190178462	178.167401706341
ENSG00000052802	11.4070766527705	69.5719568206547	36.2871179554221	42.3442477186751	22.904972610367	21.9664499109792	114.004593439534	101.472716493024	36.6052430736685	136.236397862818	25.3766715318798	164.415279759161	57.8201560712414	16.7547669450841	62.5359518167211	8.21148822583339	3.31398703665967	30.0810130972534	45.5691296652287	200.815092868121	43.1364951727182	12.4934380795081	33.8203859423934	28.2424789195222	43.2724352832887	65.4495915516058	26.6829176888416	22.159288137367	52.8215354353547	53.9639023583102	10.8740114199041	14.3613496878271	25.4524859580487
ENSG00000052841	136.884919833246	75.5221899697897	92.3672093410745	80.5774034258284	93.3165550792731	149.371859394658	94.1530473182221	101.472716493024	124.833264840972	163.166848603143	88.380821542064	105.993606748292	113.57530656851	26.2248526096969	116.671551896868	49.2689293550003	9.94196110997901	100.986258255065	93.8453363402729	54.6486552819119	109.733189474459	20.5774274250721	99.633028857321	55.0728338930682	75.3260910486878	41.3365841378563	82.717044835409	103.798770748719	130.746374839987	106.981069587527	74.758828511841	51.7008588761777	111.990938215414
ENSG00000053108	0	0	0	0	0.848332318902482	0	1.13437406407496	0	0	0	0	0	0	0.728468128047135	2.80011724552482	0	0	0.859457517064384	2.70707700981556	0	0	0	0.914064484929551	0	0	9.47296719825873	0	0	0	0	0	0	0
ENSG00000053254	424.343251483061	266.082220822855	108.861353866266	211.721238593376	202.751424217693	186.714824243323	262.607595833354	182.146677431577	144.074482354054	177.424146053903	98.881513210428	338.011108134316	174.148803405048	106.356346694882	169.873779561839	517.323758227503	129.245494429727	228.185970780594	241.832212876857	231.88247909003	220.979940183048	340.997368758338	223.94579880774	160.982129841276	86.5448705665774	217.878245559951	325.531595803868	145.784790377414	159.510577304784	149.58415039672	178.06193700093	354.72533728933	621.040657376389
ENSG00000053371	59.3167985944064	8.54392452183479	49.4824335755756	76.4663114143066	20.3599756536596	36.2446423531156	59.5546383639356	63.656797303077	32.8508591686768	15.8414416119556	91.005994459155	0	38.5467707141609	27.6817888657911	69.0695587229457	0	162.385364796324	49.4188072312021	95.6500543468166	148.599425663829	67.3534749188057	22.0472436697201	60.3282560053504	63.5455775689249	57.6965803777183	57.6989820257577	16.009750613305	117.794110624951	47.5916804417553	53.0171672292171	16.3110171298562	21.5420245317407	106.900441023805
ENSG00000053372	38.7840606194196	63.4691535907727	52.781262480614	51.3886501440232	11.0283201457323	52.71947978635	8.50780548056223	18.9079595949734	32.3815611805529	20.0658260418104	99.7565708494584	74.2789842566768	62.6385024105115	0	44.8018759283972	8.21148822583339	39.767844439916	64.889042538361	29.3266676063353	55.3972669981024	18.9195154266308	80.8398934556405	62.1563849752095	72.0183212447815	65.7099943190681	34.4471534482136	6.6707294222104	62.979029443043	43.9307819462356	62.4845185201487	206.606216978179	1.43613496878271	5.09049719160975
ENSG00000053501	2.28141533055409	16.6301388014284	23.0918023352686	20.5554600576093	5.93832623231738	5.49161247774479	0	3.15132659916223	14.0789396437186	0	9.6256340293337	0	6.88335191324302	0	0.933372415174941	8.21148822583339	0	0	31.5825651145149	18.1538341176214	0.756780617065232	9.55380559021206	16.4531607287319	5.64849578390443	4.80804836480986	2.58353650861602	9.33902119109456	23.3255664603863	5.75284049295943	11.3608215491179	1.35925142748802	1.43613496878271	218.891379239219
ENSG00000053524	0	0	0	2.46665520691312	3.39332927560993	0	1.13437406407496	1.89079595949734	7.03946982185932	0	0.875057639030337	0	0	0	0	0	0	0	0	35.9333623771475	0	0	10.9687738191546	4.23637183792833	0	0	0	0	0	8.52061616183845	0	2.87226993756543	0
ENSG00000053747	0	0.457710242241149	65.9765781007675	6.16663801728279	5.08999391341489	19.7698049198812	4.53749625629986	8.82371447765423	48.3376927767674	0.528048053731854	35.8773632002438	0	0.688335191324302	0	8.40035173657447	8.21148822583339	3.31398703665967	21.4864379266096	0	0	1.51356123413046	10.2887137125361	0	8.47274367585665	0	0	0	40.819741305676	0.522985499359948	0	0	14.3613496878271	0
ENSG00000053770	2.28141533055409	50.5006967272735	6.59765781007675	20.5554600576093	50.0516068152465	39.5396098397625	27.7921645698366	31.5132659916223	63.8245263848579	7.39267275224595	43.7528819515168	68.4368169555899	30.2867484182693	27.6817888657911	28.0011724552482	24.6344646775002	19.883922219958	33.518843165511	21.6566160785245	16.0951518980973	38.5958114703269	37.4803142385243	2.74219345478865	25.4182310275699	14.4241450944296	57.6989820257577	30.6853553421678	48.9836895668112	21.9653909731178	14.2010269363974	4.07775428246406	22.9781595005234	25.4524859580487
ENSG00000053900	0	21.9700916275752	42.8847757654989	47.6886673336536	11.8766524646348	39.5396098397625	20.9859201853868	20.7987555544707	33.7894551449248	53.8609014806491	26.2517291709101	24.2032645330745	43.365117053431	47.3504283230638	21.4675655490237	8.21148822583339	26.5118962932774	73.0538889504726	30.2290266096071	8.6090347361916	14.3788317242394	2.20472436697202	1.8281289698591	18.3576112976894	28.8482901888591	11.1953248706694	25.3487718043995	11.6627832301931	12.5516519846387	51.1236969710307	193.013702703299	17.2336196253926	5.09049719160975
ENSG00000053918	43.3468912805278	102.37452418127	62.6777491957291	27.5443164771965	27.9949665237819	43.9328998219583	51.0468328833734	52.3120215460929	91.9824056722952	132.012013432963	15.7510375025461	41.7297664363353	83.9768933415649	120.925709255824	70.9363035532955	8.21148822583339	165.699351832983	96.6889706697432	102.868926372991	48.4726086233396	103.678944537937	70.5511797431045	132.539350314785	48.0122141631877	27.2456074005892	89.5625989653553	105.397524870924	32.6557930445408	16.2125504801584	54.9106374874034	62.5255656644488	251.323619536975	198.52939047278
ENSG00000054116	200.76454908876	115.648121206264	102.26369605619	92.4995702592418	42.4166159451241	83.4725096617208	55.0171421076358	89.4976754162072	97.1446835416587	62.3096703403587	91.8810520981853	117.677941350466	132.160356734266	99.0716654144104	82.1367725353948	24.6344646775002	13.2559481466387	112.159205976902	113.246054910618	131.942814978589	121.841679347502	58.0577416635964	84.0939326135187	80.4910649206382	75.3260910486878	64.5884127154005	100.060941333156	97.9673791336224	139.114142829746	28.4020538727948	182.139691283394	123.507607315313	91.6289494489754
ENSG00000054118	104.945105205488	126.480596939304	316.687574883684	194.865761346136	149.306488126837	158.15843935905	186.037346508294	186.558534670404	173.170957617739	192.209491558395	122.508069464247	204.475855538043	87.4185692981864	246.950695407979	217.475772735761	229.921670323335	92.7916370264708	125.910526249932	60.0068737175783	27.5114805700036	98.3814802184802	200.629917394453	112.429931646335	168.042749571157	144.241450944296	80.0896317670966	264.160885119532	92.1359875185258	98.8442593790301	171.359058365862	258.257771222724	216.85638028619	483.597233202926
ENSG00000054148	2.28141533055409	15.8672883976932	46.1836046705373	20.9665692587615	13.5733171024397	18.6714824243323	22.1202942494618	22.0592861941356	0.93859597624791	98.7449860478566	17.5011527806067	0	16.5200445917833	67.0190677803365	32.6680345311229	0	46.3958185132354	33.0891144069788	52.7880016914035	0	62.8127912164143	0.734908122324005	1.8281289698591	19.7697352436655	22.4375590357793	35.3083322844189	0	43.1522979517146	1.56895649807984	12.3075566782111	0	1.43613496878271	0
ENSG00000054179	2.28141533055409	11.7478962175228	13.1953156201535	6.16663801728279	4.24166159451241	0	2.26874812814993	0	14.0789396437186	0	1.75011527806067	0	0	0	2.80011724552482	0	0	8.16484641211165	5.86533352126705	0	23.4601991290222	0	39.3047728519707	1.41212394597611	0	6.88943068964271	0	0	4.70686949423953	1.89347025818632	1.35925142748802	4.30840490634814	0
ENSG00000054219	13.6884919833246	17.5455592859107	0	38.6442649083055	20.3599756536596	25.261417397626	23.8218553455743	7.56318383798934	37.0745410617924	44.3560365134757	3.50023055612135	0	11.7016982525131	0	13.0672138124492	8.21148822583339	0	28.3620980631247	41.0573346488694	0.187152929047643	30.2712246826093	9.55380559021206	0.914064484929551	9.88486762183276	14.4241450944296	18.9459343965175	18.6780423821891	18.660453168309	11.5056809859189	8.52061616183845	78.8365827943051	20.105889562958	0
ENSG00000054267	200.76454908876	200.934796343865	442.043073275142	471.953362922709	337.636262923188	275.678946382788	222.904503590731	335.301150150861	206.960412762664	249.766729415167	277.393271572617	377.237088584471	124.588669629699	238.209077871413	158.67331057974	640.496081615004	169.013338869643	231.623800848851	243.636930883401	242.924501903841	184.654470563917	427.716527192571	168.187865227037	213.230715842392	415.094842161918	239.407716465084	1246.0922560689	459.51365926961	178.861040781102	285.914008986135	324.861091169636	656.3136807337	1292.98628666888
ENSG00000054277	54.7539679332982	17.0878490436696	72.5742359108443	30.8331900864139	39.8716189884167	6.58993497329375	1.13437406407496	56.0936134650876	19.2412175130822	0	23.6265562538191	0.834595328726706	17.8967149744319	8.01314940851849	12.1338413972742	0	3.31398703665967	39.5350457849617	7.67005152781076	46.9753851909585	16.6491735754351	13.2283462018321	0.914064484929551	31.0667268114744	35.259021341939	4.3058941810267	36.0219388799362	6.99766993811588	25.1033039692775	35.9759349055401	0	4.30840490634814	0
ENSG00000054282	2.28141533055409	83.1506940071421	16.4941445251919	69.0663457935672	68.7149178311011	61.5060597507416	51.0468328833734	66.1778585824067	77.4341680404526	31.1548351701794	29.7519597270314	60.9254589970496	42.6767818621067	115.826432359495	119.471669142392	65.6919058066671	76.2217018431724	50.7079935067987	68.128104747025	131.568509120493	76.4348423235885	60.2624660305684	59.4141915204208	70.6061972988054	78.5314566252277	103.341460344641	102.72923310204	90.9697091955065	44.9767529449555	69.1116644238008	44.8552971071046	86.1680981269629	76.3574578741462
ENSG00000054392	2.28141533055409	0.3051401614941	19.7929734302303	40.2887017129142	2.54499695670745	5.49161247774479	10.2093665766747	28.36193939246	2.81578792874373	49.1084689970624	20.1263256976977	2.50378598618012	7.57168710456733	0	8.40035173657447	0	3.31398703665967	20.197251651013	24.3636930883401	60.4503960823888	24.9737603631527	0	13.7109672739433	16.9454873517133	6.41073115307981	10.3341460344641	0	5.83139161509657	5.75284049295943	20.8281728400496	2.71850285497604	1.43613496878271	35.6334803412682
ENSG00000054523	77.5681212388392	82.0827034419128	59.3789202906908	87.5662598454156	22.0566402914645	41.7362548308604	45.9421495950361	18.9079595949734	61.4780364442381	164.222944710606	56.0036888979415	0	53.0018097319713	0.728468128047135	58.8024621560213	139.595299839168	0	47.2701634385411	34.2896421243305	24.7041866342889	52.9746431945663	86.7191584342326	48.4454177012662	83.3153128125904	78.5314566252277	49.0871936637043	224.13650858627	97.9673791336224	38.1779414532762	83.3126913601982	188.935948420835	80.423558251832	223.981876430829
ENSG00000054598	260.081347683167	347.554643941779	75.8730648158827	151.699295225157	281.646329875624	271.285656400593	277.354458666329	340.973538029353	180.210427439599	243.430152770385	130.38358821552	136.87363391118	495.601337753498	418.869173627103	439.618407547397	0	513.667990682249	233.772444641512	229.199186831051	103.495569763347	266.386777206962	141.837267608533	223.03173432281	125.679031191874	214.759493628174	217.878245559951	161.431652017492	116.627832301931	422.049297983478	238.577252531477	284.083548344996	182.389141035405	106.900441023805
ENSG00000054611	34.2212299583114	28.6831751804454	112.160182771305	55.0886329543929	58.5349300042713	97.7507021038573	66.3608827483854	75.6318383798934	45.9912028361476	59.1413820179676	95.3812826543067	73.4443889279501	34.4167595662151	0.728468128047135	44.8018759283972	270.979111452502	96.1056240631304	48.1296209556055	87.9800028190058	69.0594308185804	77.9484035577189	68.3464553761325	53.0157401259139	73.4304451907576	38.4643869184789	38.7530476292403	145.421901404187	50.1499678898305	97.2753028809503	51.1236969710307	44.8552971071046	24.4142944693061	76.3574578741462
ENSG00000054654	568.072417307969	352.284316444938	686.156412247982	814.40732748248	531.904363951856	693.041494691392	332.371600773965	565.347991889703	398.433991917238	341.119042710777	402.526513953955	396.432781145185	344.167595662151	354.035510230908	465.752835172296	336.671017259169	324.770729592648	464.5367879733	372.674268351276	293.8300986048	323.902104103919	515.170593749128	428.696243431959	314.903639952672	371.822406878629	485.704863619811	545.665666736811	629.79029443043	428.325123975797	501.769618419376	78.8365827943051	564.401042731607	870.475019765267
ENSG00000054690	104.945105205488	11.7478962175228	0	57.1441789601538	43.2649482640266	41.7362548308604	38.0015311465113	27.1014087527951	37.5438390499164	1.05609610746371	30.6270173660618	0.834595328726706	15.831709400459	56.0920458596294	25.2010552097234	0	115.989546283088	31.37019937285	32.4849241177868	0.374305858095287	18.9195154266308	2.93963248929602	7.31251587943641	1.41212394597611	20.8348762475094	32.7247957758029	2.66829176888416	9.33022658415451	27.1952459667173	14.2010269363974	0	15.7974846566099	15.2714915748292
ENSG00000054793	248.674271030396	113.664710156552	95.6660382461129	100.721754282286	64.4732562365887	39.5396098397625	83.3764937095099	93.2792673352019	60.5394404679902	170.031473301657	66.5043805663056	151.896349828261	94.3019212114294	48.8073645791581	99.8708484237187	57.4804175808337	62.9657536965337	160.288826932508	166.936415605293	33.3132213704805	116.544215028046	77.9002609663445	124.312769950419	79.0789409746621	28.8482901888591	66.3107703878111	21.3463341510733	43.1522979517146	93.0914188860707	139.170063976695	81.5550856492811	31.5949693132197	10.1809943832195
ENSG00000054965	27.3769839666491	30.0563059071688	0	31.6554084887183	19.5116433347571	5.49161247774479	9.6421795446372	18.2776942751409	16.4254295843384	27.4584987940564	7.87551875127303	87.6325095163042	25.4684020789992	17.4832350731313	21.4675655490237	0	6.62797407331934	28.7918268216569	0.902359003271854	20.9611280533361	22.703418511957	0.734908122324005	63.9845139450686	28.2424789195222	9.61609672961972	2.58353650861602	30.6853553421678	44.3185762747339	16.7355359795183	12.3075566782111	4.07775428246406	5.74453987513086	20.361988766439
ENSG00000054967	0	7.62850403735249	49.4824335755756	11.9221668334134	16.1183140591472	36.2446423531156	3.40312219222489	11.9750410768165	1.40789396437186	1.58414416119556	20.1263256976977	0.834595328726706	11.0133630611888	0	7.46697932139953	287.402087904169	0	21.0567091680774	0.902359003271854	0	34.0551277679355	101.417320880713	1.8281289698591	45.1879662712355	33.656338553669	8.61178836205339	141.419463750861	29.1569580754829	0.522985499359948	15.1477620654906	82.9143370767691	199.622760660797	432.692261286828
ENSG00000054983	125.477843180475	63.9268638330139	62.6777491957291	58.7886157647626	43.2649482640266	35.1463198575667	96.9889824784095	142.439962282133	78.8420620048244	213.331413707669	31.5020750050921	116.843346021739	60.5734968365386	107.084814822929	67.2028138925958	8.21148822583339	72.9077148065127	100.556529496533	152.949851054579	25.6399512795271	80.2187454089146	30.1312330152842	108.773673706617	81.9031888666143	94.5582845079272	62.8660550429898	228.138946239596	73.4755343502168	99.89023037775	118.341891136645	5.43700570995207	318.821963069763	35.6334803412682
ENSG00000055044	100.38227454438	95.9665807898943	131.953156201535	62.4885985751323	50.0516068152465	38.4412873442135	98.6905435745219	131.095186525149	58.6622485154944	23.7621624179334	119.007838908126	141.88120588354	45.430122627404	0	110.137944990643	106.749346935834	13.2559481466387	81.6484641211165	39.2526166423257	111.730298641443	64.3263524505447	46.2992117064123	53.0157401259139	79.0789409746621	59.2992631659883	126.593288922185	32.0195012266099	73.4755343502168	81.0627524007919	92.7800426511298	10.8740114199041	157.974846566099	25.4524859580487
ENSG00000055070	114.070766527705	42.4144824476798	56.0800913856524	74.8218746096978	73.804911744516	77.980897183976	76.5702493250601	63.0265319832445	95.2674915891629	53.8609014806491	99.7565708494584	35.0530038065217	53.0018097319713	120.925709255824	112.004689820993	8.21148822583339	9.94196110997901	104.853817081855	72.6398997633843	67.0007485990563	87.786551579567	87.4540665565566	122.48464098056	84.7274367585665	126.611940273326	71.4778434050432	110.734108408693	58.3139161509657	100.93620137647	71.0051346819871	114.177119908994	119.199202408965	152.714915748292
ENSG00000055130	20.5327379749868	68.0462560131842	65.9765781007675	53.033086948632	32.2366281182943	20.8681274154302	57.8530772678232	83.1950222178828	53.0306726580069	34.3231234925705	70.0046111224269	24.2032645330745	28.9100780356207	17.4832350731313	88.6703794416194	8.21148822583339	0	52.8566372994596	101.96656736972	0.56145878714293	37.8390308532616	30.8661411376082	19.1953541835206	48.0122141631877	25.6429246123192	68.0331280602218	56.0341271465674	75.8080909962554	34.5170429577566	54.9106374874034	5.43700570995207	14.3613496878271	117.081435407024
ENSG00000055147	0	15.409578155452	69.2754070058059	33.7109544944792	13.5733171024397	15.3765149376854	18.7171720572369	0	7.97806579810723	2.64024026865927	5.25034583418202	0.834595328726706	4.81834633927012	31.3241295060268	21.4675655490237	65.6919058066671	109.361572209769	30.9404706143178	16.6936415605293	0.187152929047643	6.81102555358709	0	19.1953541835206	8.47274367585665	9.61609672961972	21.5294709051335	1.33414588444208	6.99766993811588	1.0459709987199	5.68041077455897	0	28.7226993756543	5.09049719160975
ENSG00000055163	27.3769839666491	8.84906468332889	56.0800913856524	14.3888220403265	6.78665855121986	43.9328998219583	58.9874513318982	3.78159191899467	21.5877074537019	6.33657664478224	6.12540347321236	52.5795057097825	23.4033965050263	0	46.6686207587471	24.6344646775002	62.9657536965337	61.4512124701034	10.3771285376263	15.9079989690497	40.8661533215225	74.2257203547245	87.7501905532369	66.3698254608771	35.259021341939	20.6682920689281	62.7048565687778	0	9.41373898847906	31.2422592600743	118.254874191458	100.52944781479	101.809943832195
ENSG00000055208	196.201718427652	169.657929790719	125.355498391458	106.888392299568	101.799878268298	114.225539537092	102.093665766747	103.363512452521	137.973608508443	162.638800549411	61.2540347321236	115.174155364285	106.003619463943	185.75937265202	110.137944990643	98.5378587100006	79.5356888798321	84.6565654308418	92.942977337001	56.145878714293	89.3001128136974	155.800521932689	106.031480251828	100.260800164304	94.5582845079272	68.8943068964272	349.546221723825	118.96038894797	169.447301792623	68.1649292947076	46.2145485345926	303.024478413153	417.420769711999
ENSG00000055211	41.0654759499737	104.205365150235	138.550814011612	68.2441273912629	131.491509429885	66.9976722284864	65.2265086843105	93.2792673352019	83.535041886064	43.8279884597438	119.882896547156	38.3913851214285	124.588669629699	153.706775017946	104.537710499593	0	222.037131456198	85.086294189374	70.8351817568406	88.8976412976306	108.219628240328	36.7454061162003	111.515867161405	86.1395607045426	134.625354214676	99.035566163614	150.758484941955	106.131327394758	157.941620806704	78.5790157147324	76.118079939329	60.317668688874	10.1809943832195
ENSG00000055332	146.010581155462	158.672883976932	138.550814011612	137.31047318483	126.40151551647	174.633276792284	114.004593439534	230.677107058675	116.855199042865	213.331413707669	70.8796687614573	253.716979932919	191.357183188156	128.938858664343	158.67331057974	205.287205645835	132.559481466387	149.545607969203	209.34728875907	212.605727398123	151.356123413046	64.6719147645124	234.914572626895	117.206287516017	110.585112390627	86.1178836205339	224.13650858627	109.630162363816	133.884287836147	91.8333075220367	152.236159878658	50.264723907395	493.778227586145
ENSG00000055483	59.3167985944064	48.8224258390559	82.4707226259594	77.6996390177631	51.7482714530514	90.0624446350145	58.9874513318982	57.984409424585	94.7981936010389	59.1413820179676	60.3789770930932	146.054182527174	27.5334076529721	153.706775017946	43.8685035132222	197.075717420001	122.617520356408	109.151104667177	73.0910792650202	41.3607973195292	123.355240581633	32.3359573822562	58.5001270354913	98.8486762183276	75.3260910486878	71.4778434050432	46.6951059554728	61.8127511200236	93.6144043854307	112.661480362086	13.5925142748802	188.133680910536	417.420769711999
ENSG00000055609	166.543319130449	217.71750522604	323.285232693761	330.94290692751	320.669616545138	209.779596649851	186.604533540332	264.711434329627	151.113952175913	231.813095588284	272.142925738435	382.244660556831	150.745406900022	280.460229298147	240.810083115135	377.728458388336	298.25883329937	177.048248515263	279.731291014275	174.426529872404	130.16626613522	401.259834788907	176.414445591403	216.054963734345	243.607783817033	189.459343965175	490.965685474686	417.527639640914	242.142286203656	186.506820431353	183.498942710882	300.152208475587	529.411707927414
ENSG00000055732	0	0	3.29882890503838	16.4443680460874	0.848332318902482	14.2781924421365	0	0	0.469297988123955	0.528048053731854	16.6260951415764	0	2.75334076529721	0	0	65.6919058066671	0	6.44593137798288	0	0	15.1356123413046	5.87926497859204	0	4.23637183792833	0	8.61178836205339	0	8.1639482611352	4.18388399487958	0	1.35925142748802	30.158834344437	0
ENSG00000055917	152.854827147124	166.606528175778	62.6777491957291	158.688151644744	112.82819841403	60.4077372551927	104.929600926934	177.73482019275	153.460442116533	130.427869271768	84.8805909859426	8.34595328726706	114.951976951158	173.375414475218	99.8708484237187	123.172323387501	135.873468503046	122.472696181675	119.562567933521	91.1434764462023	65.8399136846752	115.380575204869	56.6719980656322	139.800270651635	112.187795178897	159.318084697988	232.141383892922	129.456893855144	118.717708354708	158.104766558558	13.5925142748802	90.476503033311	15.2714915748292
ENSG00000055950	216.734456402639	69.7245269014018	39.5859468604605	38.2331557071533	99.2548813115904	105.4389595727	129.885830336583	82.5647568980503	129.526244722212	85.5437847045603	52.5034583418202	217.82938079767	137.66703826486	101.985537926599	108.271200160293	8.21148822583339	9.94196110997901	101.415987013597	57.7509762093987	248.164783917175	74.921281089458	15.4330705688041	57.5860625505617	77.666817028686	57.6965803777183	82.6731682757126	37.3560847643783	123.625502240047	126.039505345747	120.235361394832	70.681074229377	35.9033742195679	20.361988766439
ENSG00000055955	0	0	0	0.411109201152186	0	0	0	0	0	11.0890091283689	0	0	0	0	0	0	0	0	0	0	0	0	0	0	0	0	0	16.3278965222704	0	0	0	0	66.1764634909267
ENSG00000056050	2.28141533055409	25.7843436462514	9.89648671511513	20.5554600576093	16.1183140591472	28.5563848842729	48.7780847552235	15.7566329958111	12.2017476912228	0	28.0018444489708	1.66919065745341	57.1318208799171	43.7080876828281	27.0678000400733	0	3.31398703665967	42.9728758532192	69.0304637502969	20.2125163371455	3.02712246826093	6.61417310091605	11.8828383040842	22.5939831356177	67.312677107338	52.5319090085257	6.6707294222104	6.99766993811588	38.1779414532762	34.0824646473538	2.71850285497604	44.5201840322641	10.1809943832195
ENSG00000056097	70.7238752471769	74.4541994045603	59.3789202906908	117.166122328373	85.6815642091507	123.012119501483	83.3764937095099	131.095186525149	113.100815137873	51.2206612119898	142.634395161945	13.3535252596273	112.198636185861	136.223539944814	84.9368897809197	41.0574411291669	9.94196110997901	82.5079216381808	76.7005152781076	72.6153364704856	47.6771788751096	44.0944873394403	51.1876111560548	108.73354384016	97.7636500844671	78.3672740946859	76.0463154131986	113.128997332873	128.131447343187	124.969037040297	127.769634183874	58.8815337200913	0
ENSG00000056277	0	0	3.29882890503838	2.46665520691312	0.848332318902482	8.78657996439166	5.10468328833734	4.41185723882712	3.75438390499164	0	0.875057639030337	0	0	0	0	0	0	0.859457517064384	0	0.187152929047643	14.3788317242394	33.8057736269042	0	4.23637183792833	4.80804836480986	0	0	0	0	0	1.35925142748802	0	0
ENSG00000056558	0	0	0	0	13.5733171024397	12.0815474510385	0	0	0	0	6.12540347321236	0.834595328726706	0	0	0	0	3.31398703665967	0	7.21887202617484	9.35764645238217	6.81102555358709	41.1548548501443	0	7.06061972988054	14.4241450944296	0.861178836205339	25.3487718043995	8.1639482611352	5.22985499359948	13.2542918073043	0	44.5201840322641	213.800882047609
ENSG00000056586	157.417657808232	113.969850318046	118.757840581382	85.9218230408068	59.3832623231738	61.5060597507416	135.557700656958	71.8502464608987	28.6271772755613	67.5901508776773	87.5057639030337	62.594649654503	49.5601337753498	55.3635777315823	115.738179481693	164.229764516668	92.7916370264708	125.4807974914	111.89251640571	40.0507268161957	87.0297709625017	65.4068228868365	21.0234831533797	55.0728338930682	83.3395049900375	61.1436973705791	66.707294222104	104.965049071738	99.3672448783901	43.5498159382854	9.51475999241613	100.52944781479	20.361988766439
ENSG00000056972	22.8141533055409	104.510505311729	108.861353866266	35.7665005002402	32.2366281182943	25.261417397626	15.314049865012	11.9750410768165	56.3157585748746	85.5437847045603	30.6270173660618	63.4292449832297	37.1701003315123	0.728468128047135	14.0005862276241	254.556135000835	6.62797407331934	46.4107059214767	37.8990781374179	29.7573157185753	41.6229339385878	10.2887137125361	36.562579397182	32.4788507574505	14.4241450944296	12.9176825430801	64.0390024532199	57.1476378279464	60.6663179257539	15.1477620654906	1.35925142748802	12.9252147190444	127.262429790244
ENSG00000056998	2.28141533055409	0	23.0918023352686	0	11.0283201457323	5.49161247774479	0	10.0842451173191	3.75438390499164	0.528048053731854	0.875057639030337	0.834595328726706	13.0783686351617	29.8671932499326	5.60023449104965	0	0	18.9080653754164	4.06061551472335	0	14.3788317242394	0	21.0234831533797	4.23637183792833	3.20536557653991	3.44471534482136	0	0	0.522985499359948	0	0	1.43613496878271	10.1809943832195
ENSG00000057019	57.0353832638523	14.1890175094756	0	40.2887017129142	11.0283201457323	28.5563848842729	34.5984089542864	54.2028175055903	37.0745410617924	153.661983635969	36.7524208392741	38.3913851214285	50.9368041579984	51.7212370913466	80.270027705045	0	72.9077148065127	35.6674869581719	7.21887202617484	29.0087040023847	5.29746431945663	12.4934380795081	30.1641280026752	38.1273465413549	48.0804836480986	56.8378031895524	5.33658353776832	40.819741305676	65.8961729193534	55.8573726164965	8.15550856492811	11.4890797502617	5.09049719160975
ENSG00000057149	962.757269493827	1572.23468209835	1207.37137924405	491.275495376862	1511.72819228422	680.959947240354	2135.45917562112	428.580417486063	888.381091518647	884.480490000855	3961.38593189033	752.804986511489	2399.53647695652	1009.65682547333	1640.86870587755	1289.20365145584	255.177001822795	847.425111825483	812.574282446305	492.212203395302	728.779734233819	1163.3595576389	1032.89286797039	666.522502500723	1264.51671994499	3151.91454051154	949.911869722761	921.359875185258	679.358163668572	1253.47731091935	2082.37318691164	291.535398662891	931.560986064584
ENSG00000057252	95.8194438832719	20.4443908201047	115.459011676343	72.3552194027847	23.7533049292695	43.9328998219583	90.1827380939597	93.9095326550343	42.2368189311559	24.8182585253971	39.3775937563651	1.66919065745341	43.365117053431	45.1650239389224	51.3354828346218	24.6344646775002	3.31398703665967	41.6836895776226	44.2155911603209	3.93021151000051	20.4330766607613	16.9028868134521	14.6250317588728	48.0122141631877	54.4912148011784	74.9225587498645	49.363397724357	36.1546280135987	28.2412169654372	63.4312536492418	72.040325656865	30.158834344437	0
ENSG00000057294	57.0353832638523	52.6366778577322	0	36.9998281036967	23.7533049292695	17.5731599287833	35.7327830183614	37.1856538701143	50.6841827173871	17.4255857731512	30.6270173660618	25.8724551905279	27.5334076529721	12.3839581768013	60.6692069863712	8.21148822583339	33.1398703665967	39.9647745434939	24.814872589976	31.0673862219088	24.2169797460874	68.3464553761325	62.1563849752095	28.2424789195222	12.8214623061596	51.6707301723204	4.00243765332624	29.1569580754829	26.6722604673573	45.4432861964718	65.2440685194249	10.052944781479	5.09049719160975
ENSG00000057608	98.100859213826	219.700916275752	240.814510067801	110.99948431109	184.936445520741	160.355084350148	210.993575917943	124.162268006992	164.723593831508	145.741262829992	203.013372255038	116.843346021739	176.213808979021	213.441161517811	124.138531218267	65.6919058066671	175.641312942962	149.975336727735	164.229338595478	162.074436555259	142.274756008264	161.679786911281	69.4689008546459	127.09115513785	184.308520651045	218.739424396156	174.773110861913	229.756829634805	122.378606850228	144.850474751254	180.780439855906	285.79085878776	244.343865197268
ENSG00000057657	63.8796292555146	79.9467223114541	273.802799118185	24.6665520691312	79.7432379768333	54.9161247774479	13.6124887688996	44.7488377081036	35.1973491092966	67.5901508776773	35.8773632002438	32.5492178203415	70.2101895150788	115.826432359495	33.6014069462979	402.362923065836	72.9077148065127	23.6350817192706	39.7037961439616	107.2386283443	112.003531325654	126.404197039729	39.3047728519707	38.1273465413549	56.0938975894483	37.0306899568296	190.782861475218	69.9766993811589	99.3672448783901	64.377988778335	133.206639893826	71.8067484391357	81.4479550657559
ENSG00000057663	11.4070766527705	23.9535026772868	52.781262480614	42.3442477186751	45.8099452207341	53.8178022818989	32.3296608261365	28.9922047122925	40.8289249667841	60.1974781254313	48.1281701466685	1.66919065745341	47.4951282013769	16.7547669450841	67.2028138925958	0	3.31398703665967	44.691790887348	18.0471800654371	57.8302550757218	45.4068370239139	16.1679786911281	5.4843869095773	60.7213296769727	19.2321934592394	64.5884127154005	45.3609600710307	62.979029443043	41.3158544494359	33.1357295182607	4.07775428246406	25.8504294380889	5.09049719160975
ENSG00000057704	152.854827147124	14.3415875902227	36.2871179554221	56.7330697590017	59.3832623231738	112.028894545994	5.10468328833734	25.2106127932978	24.8727933705696	1.05609610746371	82.2554180688516	2.50378598618012	17.8967149744319	74.3037490608078	22.4009379641986	303.825064355835	79.5356888798321	55.4350098506528	1.80471800654371	11.6034816009539	31.0280052996745	282.939627094742	31.9922569725343	62.1334536229488	75.3260910486878	25.8353650861602	352.214513492709	108.463884040796	31.9021154609568	38.8161402928196	222.917234108035	442.329570385076	223.981876430829
ENSG00000057757	13.6884919833246	18.1558396088989	3.29882890503838	23.8443336668268	39.0232866695142	50.5228347952521	58.9874513318982	54.8330828254227	22.5263034299498	31.1548351701794	25.3766715318798	3.33838131490682	67.4568487497816	70.6614084205721	28.0011724552482	0	89.4776499898111	47.6998921970733	46.0203091668646	47.3496910490538	35.5686890020659	24.9868761590162	130.711221344926	62.1334536229488	48.0804836480986	78.3672740946859	32.0195012266099	46.6511329207726	30.8561444622369	52.0704321001239	2.71850285497604	90.476503033311	15.2714915748292
ENSG00000057935	4.56283066110819	28.5306050996983	26.390631240307	97.0217714719159	88.2265611658582	35.1463198575667	58.9874513318982	71.2199811410663	57.2543545511225	100.857178262784	87.5057639030337	33.3838131490682	111.510300994537	64.1051952681479	60.6692069863712	8.21148822583339	92.7916370264708	150.834794244799	101.064208366448	94.1379233109646	127.895924284024	27.1916005259882	110.601802676476	55.0728338930682	36.8617041302089	82.6731682757126	33.353647111052	41.9860196286953	86.8155928937513	56.8041077455897	9.51475999241613	27.2865644068716	30.5429831496585
ENSG00000058056	66.1610445860687	0	0	20.9665692587615	4.24166159451241	14.2781924421365	36.2999700503989	7.56318383798934	13.1403436674707	25.8743546328608	0.875057639030337	13.3535252596273	21.3383909310534	0	10.2670965669244	8.21148822583339	3.31398703665967	5.5864738609185	0	0	7.56780617065232	0.734908122324005	39.3047728519707	0	12.8214623061596	1.72235767241068	2.66829176888416	1.16627832301931	1.0459709987199	0.946735129093162	1.35925142748802	7.18067484391357	0
ENSG00000058063	57.0353832638523	52.3315376962381	72.5742359108443	65.3663629831975	61.9282592798812	28.5563848842729	23.2546683135368	51.0514909064281	19.2412175130822	68.646246985141	72.6297840395179	5.00757197236024	57.1318208799171	25.4963844816497	74.6697932139953	106.749346935834	89.4776499898111	51.567451023863	24.814872589976	62.1347724438176	34.0551277679355	94.0682396574726	63.9845139450686	60.7213296769727	41.6697524950188	50.809551336115	221.468216817385	66.4778644121009	54.9134774327945	52.0704321001239	24.4665256947843	107.710122658704	147.624418556683
ENSG00000058085	2.28141533055409	16.0198584784402	135.251985106573	109.766156707634	33.0849604371968	229.549401569732	58.4202642998607	66.8081239022392	352.912087069214	22.1780182567379	128.633472937459	22.5340738756211	20.6500557397291	18.9401713292255	98.0041035933688	123.172323387501	3.31398703665967	167.164487069023	27.9731291014275	63.0705370890558	68.1102555358709	66.1417310091605	130.711221344926	91.788056488447	19.2321934592394	31.8636169395976	40.0243765332624	305.56492063106	88.9075348911911	66.2714590365213	5.43700570995207	45.9563190010469	127.262429790244
ENSG00000058091	4.56283066110819	33.4128476836039	0	27.1332072760443	9.33165550792731	6.58993497329375	18.1499850251994	1.26053063966489	38.9517330142883	0	0	0	0	0	14.0005862276241	0	0	6.87566013651507	0	0.187152929047643	18.1627348095656	16.9028868134521	0.914064484929551	1.41212394597611	6.41073115307981	12.9176825430801	36.0219388799362	11.6627832301931	14.6435939820785	10.4140864200248	0	7.18067484391357	20.361988766439
ENSG00000058262	79.8495365693933	209.173580704205	98.9648671511513	106.477283098416	173.059793056106	180.124889270029	175.82797993162	153.784738039117	321.938419853033	257.687450221145	169.761181971885	166.919065745341	151.433742091347	101.257069798552	135.339000200366	295.613576130002	212.095170346219	312.412807452904	288.754881046993	400.320115232909	336.010593976963	238.845139755302	211.148896018726	168.042749571157	169.884375556615	179.125197930711	154.760922595281	185.438253360071	153.234751312465	296.32809540616	369.716388276741	317.38582810098	305.429831496585
ENSG00000058272	66.1610445860687	90.9317681252417	201.228563207341	128.677179960634	222.26306755245	162.551729341246	99.2577306065594	143.070227601965	156.276230045277	114.586427659812	192.512680586674	243.701835988198	119.081988099104	223.639715310471	107.337827745118	541.958222905003	122.617520356408	68.7566013651507	81.6634897961028	144.669214153828	91.5704546648931	177.112857480085	10.0547093342251	169.454873517133	144.241450944296	126.593288922185	597.697356230052	277.574240878597	85.2466363956715	170.412323236769	258.257771222724	460.999324979251	702.488612442145
ENSG00000058404	0	0	0	0	0	0	0	0	0	0	6.12540347321236	0	0	0	0	0	0	6.01620261945069	0	0	0	0	0	0	0	0	0	0	0	0	0	0	0
ENSG00000058453	57.0353832638523	0.762850403735249	6.59765781007675	134.021599575613	11.0283201457323	29.6547073798219	23.2546683135368	113.44775756984	32.8508591686768	77.0950158448506	0.875057639030337	0.834595328726706	0	10.927021920707	54.1356000801466	16.4229764516668	66.2797407331934	37.8161307508329	69.9328227535687	32.3774567252423	51.4610819604358	1.46981624464801	89.578319523096	29.6546028654983	25.6429246123192	61.1436973705791	0	0	12.0286664852788	29.348789001888	2.71850285497604	11.4890797502617	10.1809943832195
ENSG00000058600	66.1610445860687	46.6864447085972	6.59765781007675	18.9110232530006	51.7482714530514	42.8345773264094	31.762473794099	45.379103027936	27.2192833111894	6.33657664478224	29.7519597270314	50.0757197236024	41.3001114794581	19.6686394572727	12.1338413972742	114.960835161667	99.4196110997901	42.9728758532192	61.811591724122	0	17.4059541925003	9.55380559021206	40.2188373369002	9.88486762183276	25.6429246123192	36.1695111206243	5.33658353776832	0	17.7815069782382	28.4020538727948	0	5.74453987513086	30.5429831496585
ENSG00000058668	221.297287063747	56.6034999571555	141.84964291665	154.577059633222	84.8332318902482	130.700376970326	178.663915091807	94.5397979748668	83.06574389794	133.596157594159	182.88704655734	222.002357441304	86.7302341068621	67.7475359083836	151.20633125834	123.172323387501	9.94196110997901	128.059170042593	79.4075922879232	49.0340674104826	60.5424493652186	8.81889746788806	64.8985784299981	63.5455775689249	88.1475533548474	67.1719492240165	157.429214364165	174.941748452897	83.1546943982317	86.1528967474777	14.9517657023682	185.26141097297	25.4524859580487
ENSG00000058673	143.729165824908	101.001393454547	65.9765781007675	153.754841230918	98.406548992688	98.8490245994062	123.079585952134	178.365085512582	162.846401879012	124.619340680717	156.63531738643	89.3017001737576	88.1069044895107	266.619334865252	139.072489861066	312.036552581669	36.4538574032564	89.8133105332281	145.730979028405	177.608129666214	118.814556879241	196.955376782833	204.750444624219	114.382039624065	100.969015661007	89.5625989653553	213.463341510733	236.754499572921	113.487853361109	92.7800426511298	178.06193700093	147.92190178462	285.067842730146
ENSG00000058729	43.3468912805278	21.6649514660811	122.05666948642	11.099948431109	6.78665855121986	8.78657996439166	40.8374663066987	45.379103027936	7.03946982185932	33.7950754388386	18.3762104196371	5.00757197236024	32.3517539922422	4.37080876828281	35.4681517766478	0	0	8.16484641211165	27.9731291014275	0	10.5949286389133	18.3727030581001	0.914064484929551	29.6546028654983	22.4375590357793	7.75060952584805	2.66829176888416	23.3255664603863	9.41373898847906	33.1357295182607	2.71850285497604	1.43613496878271	10.1809943832195
ENSG00000058799	25.095568636095	121.750924436146	131.953156201535	23.8443336668268	112.82819841403	50.5228347952521	73.7343141648727	81.9344915782179	96.2060875654108	34.8511715463023	49.0032277856988	176.099614361335	57.8201560712414	168.276137578888	60.6692069863712	65.6919058066671	165.699351832983	69.1863301236829	39.2526166423257	1.49722343238115	20.4330766607613	57.3228335412724	54.843869095773	98.8486762183276	73.7234082604178	82.6731682757126	74.7121695287565	89.8034308724872	74.2639409091126	91.8333075220367	67.9625713744009	173.772331222708	15.2714915748292
ENSG00000058804	52.4725526027442	39.82079107498	13.1953156201535	14.7999312414787	33.0849604371968	40.6379323353114	36.2999700503989	18.2776942751409	49.7455867411392	0	42.8778243124865	25.8724551905279	55.0668153059442	45.8934920669695	32.6680345311229	8.21148822583339	6.62797407331934	39.1053170264295	15.7912825572575	51.2799025590543	59.0288881310881	30.1312330152842	26.507870062957	16.9454873517133	28.8482901888591	111.092069870489	2.66829176888416	2.33255664603863	16.7355359795183	15.1477620654906	2.71850285497604	7.18067484391357	10.1809943832195
ENSG00000058866	0	0.15257008074705	0	7.39996562073935	0	0	0.567187032037482	0	0	0	2.62517291709101	0	0	0	0	8.21148822583339	43.0818314765757	0	0.902359003271854	0	4.54068370239139	0	18.281289698591	0	0	0.861178836205339	4.00243765332624	0	0.522985499359948	9.46735129093162	0	5.74453987513086	0
ENSG00000059122	0	0.15257008074705	32.9882890503838	10.2777300288046	20.3599756536596	15.3765149376854	6.23905735241231	3.15132659916223	3.75438390499164	61.253574232895	25.3766715318798	0	8.26002229589163	0	18.6674483034988	0	0	9.88376144624042	22.5589750817964	0	16.6491735754351	22.0472436697201	15.5390962438024	14.1212394597611	1.60268278826995	13.7788613792854	5.33658353776832	0	19.873448975678	23.668378227329	0	35.9033742195679	0
ENSG00000059145	0	41.3464918824505	3.29882890503838	21.3776784599137	28.8432988426844	41.7362548308604	25.5234164416867	32.1435313114547	12.2017476912228	3.16828832239112	25.3766715318798	2.50378598618012	50.9368041579984	27.6817888657911	10.2670965669244	0	26.5118962932774	17.1891503412877	20.3030775736167	23.9555749180984	24.2169797460874	18.3727030581001	31.9922569725343	16.9454873517133	19.2321934592394	17.2235767241068	21.3463341510733	23.3255664603863	25.6262894686374	25.5618484855154	1.35925142748802	18.6697545941753	10.1809943832195
ENSG00000059377	6.84424599166228	16.6301388014284	138.550814011612	33.2998452933271	12.7249847835372	27.4580623887239	5.67187032037482	15.7566329958111	16.8947275724624	1.58414416119556	28.8769020880011	115.174155364285	17.8967149744319	0.728468128047135	5.60023449104965	385.939946614169	3.31398703665967	18.9080653754164	23.9125135867041	0	26.4873215972831	166.089235645225	21.0234831533797	90.3759325424709	70.5180426838779	3.44471534482136	384.234014719319	61.8127511200236	1.0459709987199	38.8161402928196	140.002897031266	617.538036576567	381.787289370731
ENSG00000059378	2.28141533055409	27.462614534469	0	24.255442867979	15.2699817402447	40.6379323353114	51.0468328833734	36.5553885502818	48.3376927767674	37.4914118149616	19.2512680586674	2.50378598618012	24.0917316963506	0.728468128047135	32.6680345311229	8.21148822583339	86.1636629531514	44.2620621288158	67.2257457437532	41.5479502485768	58.2721075140229	21.3123355473961	63.070449460139	28.2424789195222	59.2992631659883	72.3390222412485	29.3512094577258	16.3278965222704	55.4364629321545	42.6030808091923	4.07775428246406	37.3395091883506	10.1809943832195
ENSG00000059573	0	5.79766306838789	9.89648671511513	30.0109716841096	23.7533049292695	9.88490245994062	32.3296608261365	30.8830006717898	30.973667216181	45.4121326209394	10.500691668364	0	42.6767818621067	0	29.8679172855981	0	0	33.0891144069788	59.1045147143065	0.187152929047643	8.32458678771756	4.40944873394403	34.7344504273229	22.5939831356177	12.8214623061596	36.1695111206243	4.00243765332624	8.1639482611352	10.459709987199	9.46735129093162	2.71850285497604	0	0
ENSG00000059588	29.6583992972032	20.9021010623458	3.29882890503838	36.9998281036967	11.8766524646348	14.2781924421365	29.4937256659491	18.9079595949734	33.7894551449248	44.8840845672076	42.8778243124865	0.834595328726706	26.8450724616478	32.7810657621211	14.9339586427991	0	43.0818314765757	24.4945392363349	24.814872589976	0	9.08136740478279	7.34908122324005	10.9687738191546	16.9454873517133	20.8348762475094	12.9176825430801	4.00243765332624	11.6627832301931	31.9021154609568	24.6151133564222	0	4.30840490634814	0
ENSG00000059691	0	27.9203247767101	16.4941445251919	22.6110060633702	6.78665855121986	16.4748374332344	21.5531072174243	0	19.7105155012061	0	0	0	11.7016982525131	38.6088107864982	13.0672138124492	0	0	16.7594215827555	0	0.187152929047643	20.4330766607613	0	0	11.2969915678089	11.2187795178897	11.1953248706694	0	65.3115860890816	23.0113619718377	0	1.35925142748802	25.8504294380889	5.09049719160975
ENSG00000059728	725.490075116202	468.54271797419	1537.25426974788	709.163371987521	512.392720617099	716.106267097921	147.468628329745	177.104554872917	202.267432881425	133.068109540427	305.395116021587	889.678620422669	418.507796325176	427.610791163668	104.537710499593	3465.24803130169	735.705122138447	185.213094927375	277.926573007731	135.873026488589	462.392957026857	1480.83986648287	265.07870062957	598.74055309387	1270.92745109807	214.43353021513	3430.08906890059	842.052949219945	278.751271158852	585.082309779574	1776.54161572684	3334.70539751346	6363.12148951218
ENSG00000059758	18.2513226444327	12.0530363790169	0	21.3776784599137	20.3599756536596	32.9496748664687	37.4343441144738	75.001573060061	23.9341973943217	105.609610746371	10.500691668364	50.0757197236024	72.2751950890517	26.2248526096969	31.734662115948	0	33.1398703665967	33.518843165511	43.7644116586849	0	34.0551277679355	1.46981624464801	19.1953541835206	14.1212394597611	24.0402418240493	55.1154455171417	76.0463154131986	17.4941748452897	23.5343474711977	35.029199776447	1.35925142748802	38.7756441571333	5.09049719160975
ENSG00000059769	0	50.6532668080205	19.7929734302303	16.8554772472396	53.4449360908564	23.0647724065281	22.6874812814993	23.9500821536329	30.0350712399331	0.528048053731854	24.5016138928494	0.834595328726706	38.5467707141609	136.952008072861	46.6686207587471	49.2689293550003	3.31398703665967	12.8918627559658	20.7542570752527	93.5764645238217	28.0008828314136	0	40.2188373369002	18.3576112976894	30.4509729771291	51.6707301723204	46.6951059554728	30.3232363985022	32.9480864596767	28.4020538727948	2.71850285497604	54.5731288137431	0
ENSG00000059804	636.514877224592	97.7974217588589	2045.27392112379	1001.05090480557	290.129653064649	591.995825100888	22.6874812814993	65.5475932625743	127.179754781592	240.261864447993	418.277551456501	1891.19301489472	44.0534522447553	29.8671932499326	46.6686207587471	4647.7023358217	520.295964755568	146.96723541801	101.96656736972	36.6819740933381	303.469027443158	2036.43040695982	47.5313532163366	628.395155959368	1161.94502149572	126.593288922185	6984.25370505429	2294.06946137899	77.4018539052723	675.968882172517	1989.94408984246	5596.61797334624	6617.64634909267
ENSG00000059915	0	3.50911185718215	0	0	0	0	5.67187032037482	3.15132659916223	0	19.0097299343467	0	0	0.688335191324302	0	0	0	0	0	0	0	0	19.1076111804241	0	9.88486762183276	6.41073115307981	0	0	0	0	0	0	0	0
ENSG00000060069	2.28141533055409	51.8738274539969	52.781262480614	78.9329666212197	56.8382653664663	75.7842521928781	39.7030922426238	62.3962666634121	35.6666470974206	68.646246985141	32.3771326441225	27.5416458479813	46.1184578187283	107.813282950976	66.2694414774208	254.556135000835	275.060924042753	42.543147094687	67.2257457437532	54.2743494238166	66.5966943017405	12.4934380795081	162.70347831746	43.7758423252594	86.5448705665774	57.6989820257577	320.195012266099	29.1569580754829	55.9594484315144	67.2181941656145	168.547177008514	57.4453987513086	234.162870814048
ENSG00000060138	271.488424335937	235.415634592698	359.572350649183	261.876561133942	365.63122944697	314.120233727002	365.835635664176	311.98133331706	492.762887530153	397.620184460086	568.787465369719	500.757197236024	404.74109249869	304.499677523703	355.614890181653	443.420364195003	344.654651812606	527.706915477532	281.987188522455	428.01874873196	379.903869766747	559.999989210892	255.938055780274	279.600541303269	392.657283126138	557.182707024854	458.946184248076	249.583561126133	279.797242157572	409.936310897339	691.858976591401	587.37920223213	473.416238819706
ENSG00000060140	0	7.47593395660544	0	9.04440242534809	18.6633110158546	9.88490245994062	13.6124887688996	0.630265319832445	32.3815611805529	0	23.6265562538191	0	29.598413226945	46.6219601950167	33.6014069462979	8.21148822583339	6.62797407331934	3.00810130972534	32.0337446161508	0	20.4330766607613	0	29.2500635177456	11.2969915678089	17.6295106709695	17.2235767241068	25.3487718043995	1.16627832301931	24.0573329705576	0	1.35925142748802	0	5.09049719160975
ENSG00000060237	305.709654294249	213.445542965123	286.998114738339	308.743010065292	244.319707843915	242.72927151632	182.067037284032	258.408781131302	269.37704518315	269.304507403245	158.385432664491	266.235909863819	165.200445917833	222.182779054376	144.672724352116	156.018276290834	222.037131456198	235.061630917109	188.593031683818	183.409870466691	108.219628240328	183.727030581001	133.453414799714	251.358062383747	120.201209120246	244.574789482316	248.151134506227	254.24867441821	198.73448975678	250.884809209688	182.139691283394	456.690920072903	442.873255670048
ENSG00000060339	116.352181858259	224.43058877891	306.791088168569	177.599174897744	225.65639682806	207.582951658753	219.501381398506	267.862760928789	185.372705308962	292.010573713715	327.271556997346	327.995964189596	272.580735764424	117.283368615589	182.007620959114	8.21148822583339	195.52523516292	311.553349935839	188.593031683818	221.58906799241	195.24939920283	138.162726996913	223.03173432281	182.163989030918	193.924617380664	257.492472025396	124.075567253113	214.595211435554	313.791299615969	173.252528624049	195.732205558275	100.52944781479	96.7194466405852
ENSG00000060491	93.5380285527178	72.1656481933546	158.343787441842	105.24395549496	62.7765915987837	143.880246916913	80.5405585493225	83.1950222178828	67.5789102898495	83.4315924896329	79.6302451517606	83.4595328726706	68.1451839411059	56.0920458596294	76.5365380443452	114.960835161667	142.501442576366	84.2268366723096	128.586157966239	53.525737707626	221.736720800113	144.776900097829	124.312769950419	59.3092057309966	94.5582845079272	82.6731682757126	230.80723800848	99.1336574566417	132.838316837427	114.554950620273	213.402474115619	281.482453881412	722.850601208584
ENSG00000060558	59.3167985944064	127.548587504534	168.240274156957	66.5996905866541	61.0799269609787	147.17521440356	96.421795446372	151.893942079619	137.504310520319	26.4024026865927	145.259568079036	102.655225433385	122.523664055726	122.382645511919	117.604924312043	262.767623226668	245.235040712816	36.9566732337685	51.4344631864957	107.2386283443	130.16626613522	158.005246299661	135.281543769574	104.497172002232	139.433402579486	114.53678521531	165.434089670818	54.8150811819078	128.654432842547	88.9931021347572	180.780439855906	274.301779037498	402.14927813717
ENSG00000060642	0	10.9850458137876	0	19.7332416553049	11.8766524646348	2.19664499109792	9.07499251259972	8.19344915782179	8.44736378623119	34.3231234925705	2.62517291709101	9.18054861599377	0.688335191324302	32.7810657621211	13.0672138124492	0	0	9.45403268770822	45.5691296652287	0.374305858095287	15.8923929583699	3.67454061162003	5.4843869095773	18.3576112976894	1.60268278826995	1.72235767241068	8.00487530665248	29.1569580754829	16.2125504801584	16.0944971945837	1.35925142748802	0	5.09049719160975
ENSG00000060656	184.794641774882	110.460738460864	59.3789202906908	161.154806851657	122.159853921957	188.911469234421	121.378024856021	89.4976754162072	121.07888093598	140.988830346405	118.132781269095	96.8130581322979	83.2885581502406	192.315585804444	130.672138124492	106.749346935834	208.781183309559	193.377941339486	198.067801218172	117.906345300015	222.493501417178	127.139105162053	204.750444624219	139.800270651635	80.1341394134976	118.842679396337	60.0365647998936	170.27663516082	124.470548847668	142.957004493067	154.954662733634	99.0933128460073	35.6334803412682
ENSG00000060688	34.2212299583114	16.6301388014284	0	11.9221668334134	8.48332318902482	17.5731599287833	30.0609126979866	11.9750410768165	33.7894551449248	23.2341143642016	11.3757493073944	0	35.1050947575394	0.728468128047135	34.5347793614728	8.21148822583339	0	1.71891503412877	4.51179501635927	0.748611716190574	3.02712246826093	8.08398934556405	16.4531607287319	35.3030986494027	16.0268278826995	29.2800804309815	20.0121882666312	8.1639482611352	18.8274779769581	8.52061616183845	5.43700570995207	37.3395091883506	0
ENSG00000060718	0	0	0	0	0	0	0	0	0	0	0	0	0	0	0	0	19.883922219958	0	0	0	0	0	0	0	1.60268278826995	0.861178836205339	0	0	0	9.46735129093162	0	0	0
ENSG00000060749	68.4424599166228	113.664710156552	6.59765781007675	77.6996390177631	56.8382653664663	39.5396098397625	50.4796458513359	47.2698989874334	68.9868042542214	12.1451052358326	34.1272479221831	11.6843346021739	41.9884466707824	25.4963844816497	80.270027705045	0	3.31398703665967	44.691790887348	66.3233867404813	19.0895987628596	44.6500564068487	43.3595792171163	53.0157401259139	43.7758423252594	22.4375590357793	12.9176825430801	30.6853553421678	3.49883496905794	74.2639409091126	17.9879674527701	4.07775428246406	17.2336196253926	20.361988766439
ENSG00000060762	50.1911372721901	46.5338746278502	26.390631240307	90.0329150523287	45.8099452207341	61.5060597507416	105.496787958972	97.0608592541965	46.9297988123955	2.64024026865927	85.755648624973	35.8875991352484	124.588669629699	32.052597634074	68.1361863077707	0	99.4196110997901	50.7079935067987	35.6431806292383	40.2378797452433	81.7323066430451	22.7821517920442	63.070449460139	94.6123043803993	88.1475533548474	69.7554857326325	64.0390024532199	23.3255664603863	112.441882362389	63.4312536492418	70.681074229377	24.4142944693061	20.361988766439
ENSG00000060971	31.9398146277573	63.9268638330139	62.6777491957291	37.8220465060011	69.5632501500036	59.3094147596437	71.4655660367228	52.3120215460929	25.8113893468175	58.0852859105039	29.7519597270314	86.7979141875774	26.1567372703235	42.979619554781	28.0011724552482	114.960835161667	0	70.4755163992795	97.4547723533603	87.2132649362018	64.3263524505447	90.3936990458526	72.2110943094345	69.1940733528293	48.0804836480986	86.9790624567393	58.7024189154515	62.979029443043	69.0340859155131	70.058399552894	224.276485535523	106.273987689921	142.533921365073
ENSG00000060982	102.663689874934	478.764913384242	339.779377218953	80.5774034258284	194.268101028668	213.074564136498	235.949805327593	105.884573731851	220.100756430135	25.346306579129	150.509913913218	237.859668687111	310.43917128726	407.942151706396	33.6014069462979	361.305481936669	374.480535142543	151.694251761864	209.798468260706	9.17049352333453	591.045661927947	70.5511797431045	177.328510076333	145.448766435539	224.375590357793	110.230891034283	284.173073386163	197.101036590264	166.832374295823	232.896841756918	12.2332628473922	107.710122658704	162.895910131512
ENSG00000061273	401.52909817752	249.299511940679	148.447300726727	304.63191805377	379.20454654941	355.856488557862	255.801351448905	148.742615480457	221.508650394507	155.246127797165	271.267868099404	199.468283565683	214.072244501858	340.194615798012	217.475772735761	878.629240164172	546.807861048845	292.215555801891	174.606467133104	41.7351031776245	196.006179819895	178.582673724733	297.985022087034	201.933724274583	238.799735452223	177.4028402583	288.175511039489	139.953398762318	446.106630954035	221.5360202078	244.665256947843	399.245521321595	636.312148951218
ENSG00000061337	0	9.15420484482299	0	0	0	0	0	0	0	0	0	29.2108365054347	17.2083797831076	0	4.66686207587471	0	0	2.14864379266096	0	0	0.756780617065232	0.734908122324005	19.1953541835206	1.41212394597611	0	0	0	0	0	7.57388103274529	0	5.74453987513086	5.09049719160975
ENSG00000061455	0	0.15257008074705	0	2.46665520691312	0	0	0	0	0	1.05609610746371	0	0	0	0	0	0	0	0.429728758532192	15.7912825572575	0	0	0	0	1.41212394597611	0	0.861178836205339	0	0	1.0459709987199	0	0	0	0
ENSG00000061656	0	0	0	4.11109201152186	1.69666463780496	3.29496748664687	6.23905735241231	0	0	0	0	0	0	0	0	0	0	2.57837255119315	0	0	0.756780617065232	0	0	0	0	0	5.33658353776832	0	0	0	0	1.43613496878271	0
ENSG00000061676	269.207009005383	129.379428473498	158.343787441842	106.066173897264	91.6198904414681	97.7507021038573	103.795226862859	100.842451173191	130.934138686583	222.30823062111	132.133703493581	6.67676262981365	118.39365290778	191.587117676397	123.205158803092	0	56.3377796232144	123.332153698739	136.25620949405	257.33527744051	99.8950414526107	120.524932061137	142.59405964901	26.8303549735461	96.1609672961972	79.2284529308912	56.0341271465674	107.297605717777	139.114142829746	83.3126913601982	184.858194138371	45.9563190010469	61.085966299317
ENSG00000061794	20.5327379749868	62.4011630255434	19.7929734302303	38.6442649083055	62.7765915987837	34.0479973620177	96.421795446372	56.7238787849201	50.2148847292632	77.6230638985825	71.7547264004876	46.7373384086955	112.886971377186	33.5095338901682	69.0695587229457	8.21148822583339	0	61.8809412286356	58.2021557110346	134.750108914303	18.9195154266308	22.0472436697201	60.3282560053504	66.3698254608771	35.259021341939	47.3648359912937	9.33902119109456	41.9860196286953	24.0573329705576	45.4432861964718	138.643645603778	11.4890797502617	10.1809943832195
ENSG00000061918	0	0	0	1.23332760345656	0	6.58993497329375	9.6421795446372	0	8.44736378623119	0	9.6256340293337	0	0	1.45693625609427	0	0	0	0	4.51179501635927	0	0	0	6.39845139450686	14.1212394597611	0	10.3341460344641	0	0	0	15.1477620654906	0	2.87226993756543	0
ENSG00000061936	189.35747243599	47.1441549508384	207.826221017418	90.4440242534809	98.406548992688	121.913797005934	91.8842991900721	104.624043092186	64.2938243729818	21.1219221492741	70.8796687614573	40.8951711076086	37.1701003315123	32.7810657621211	56.9357173256714	41.0574411291669	169.013338869643	58.8728399189103	49.1785656783161	59.1403255790553	68.8670361529362	69.0813634984565	52.1016756409844	94.6123043803993	76.9287738369577	60.2825185343738	56.0341271465674	36.1546280135987	89.953505889911	35.029199776447	141.362148458754	56.0092637825259	111.990938215414
ENSG00000061938	0	19.5289703356224	0	62.4885985751323	29.6916311615869	29.6547073798219	22.6874812814993	0.630265319832445	11.2631517149749	61.253574232895	29.7519597270314	0.834595328726706	3.44167595662151	16.7547669450841	45.7352483435721	0	0	21.0567091680774	18.9495390687089	9.9191052395251	2.2703418511957	54.3832010519764	20.1094186684501	22.5939831356177	4.80804836480986	25.8353650861602	61.3707106843357	48.9836895668112	17.2585214788783	8.52061616183845	2.71850285497604	56.0092637825259	5.09049719160975
ENSG00000061987	0	64.6897142367491	3.29882890503838	22.199896862218	34.7816250750018	56.0144472729969	66.3608827483854	93.9095326550343	32.3815611805529	33.2670273851068	53.3785159808505	70.94060294177	48.8717985840255	91.0585160058919	23.3343103793735	0	23.1979092566177	94.9700556356144	64.0674892323017	123.708086100492	90.0568934307627	17.6377949357761	96.8908354025324	40.9515944333071	54.4912148011784	55.1154455171417	50.6975436087991	30.3232363985022	39.746897951356	44.4965510673786	58.4478113819848	18.6697545941753	25.4524859580487
ENSG00000062038	109.507935866596	100.543683212306	19.7929734302303	40.6998109140664	85.6815642091507	187.813146738872	62.9577605561605	30.8830006717898	226.67092826387	42.2438442985483	87.5057639030337	173.595828375155	123.21199924705	3.64234064023568	102.670965669244	24.6344646775002	99.4196110997901	113.878121011031	50.0809246815879	42.4837148938151	189.951934883373	217.532804207905	230.344250202247	80.4910649206382	52.8885320129084	142.094507973881	64.0390024532199	178.440583421955	119.763679353428	55.8573726164965	235.150496955427	93.3487729708764	30.5429831496585
ENSG00000062194	57.0353832638523	200.171945940129	227.619194447648	226.110060633702	294.371314659161	285.563848842729	193.977964956819	364.293354863153	184.903407320838	277.753276262955	231.890274343039	277.085649137266	263.632378277208	294.301123731043	197.874952017088	303.825064355835	119.303533319748	179.626621066456	212.505545270522	352.034659538617	139.247633540003	296.902881418898	230.344250202247	208.994344004464	403.876062644028	211.849993706513	671.075379874366	219.260324727631	228.021677720937	200.70784736775	209.324719833155	514.136318824212	453.054250053267
ENSG00000062282	20.5327379749868	4.72967250315854	184.734418682149	90.8551334546331	36.4782897128067	51.621157290801	5.10468328833734	0	18.3026215368342	41.1877481910846	57.7538041760022	78.4519609003104	0	0	2.80011724552482	566.592687582504	46.3958185132354	15.4702353071589	17.5960005638012	0.374305858095287	60.5424493652186	111.706034593249	5.4843869095773	60.7213296769727	232.389004299143	18.0847555603121	1462.22388934852	146.951068700434	18.3044924775982	35.9759349055401	149.517657023682	864.553251207194	1135.18087372897
ENSG00000062370	0	4.72967250315854	0	20.1443508564571	0	2.19664499109792	0.567187032037482	0	0	51.2206612119898	10.500691668364	0	0	0	13.0672138124492	0	0	1.28918627559658	0	0	0	0	0	2.82424789195222	0	0.861178836205339	5.33658353776832	0	6.79881149167932	0	0	1.43613496878271	0
ENSG00000062485	15.9699073138787	67.1308355287019	6.59765781007675	20.5554600576093	27.9949665237819	48.3261898041541	38.0015311465113	17.017163635476	25.8113893468175	17.953633826883	35.0023055612135	3.33838131490682	68.1451839411059	44.4365558108753	32.6680345311229	0	155.757390723004	52.4269085409274	81.2123102944669	38.9278092419098	13.6220511071742	36.7454061162003	21.9375476383092	31.0667268114744	11.2187795178897	54.2542666809364	50.6975436087991	31.4895147215215	28.2412169654372	28.4020538727948	0	40.211779125916	15.2714915748292
ENSG00000062524	164.261903799895	0	0	1.64443680460874	1.69666463780496	4.39328998219583	1.70156109611245	5.67238787849201	4.22368189311559	0.528048053731854	0	0	0	0	0	0	0	0	11.2794875408982	0	6.05424493652186	0	0	5.64849578390443	6.41073115307981	0	1.33414588444208	0	13.5976229833586	2.84020538727948	0	0	0
ENSG00000062582	0	0	0	11.5110576322612	0	0	0	0	0.469297988123955	0.528048053731854	0	0	0	0	0	0	0	3.43783006825754	1.35353850490778	0	0	0	0	0	0	0	4.00243765332624	0	4.18388399487958	9.46735129093162	0	0	5.09049719160975
ENSG00000062598	0	42.4144824476798	3.29882890503838	27.5443164771965	5.93832623231738	18.6714824243323	15.314049865012	0	14.0789396437186	2.11219221492741	21.0013833367281	15.8573112458074	33.7284243748908	69.2044721644779	0.933372415174941	0	0	27.5026405460603	40.1549756455975	19.2767516919073	31.7847859167398	0.734908122324005	42.0469663067593	2.82424789195222	22.4375590357793	28.4189015947762	9.33902119109456	3.49883496905794	6.27582599231937	23.668378227329	0	28.7226993756543	5.09049719160975
ENSG00000062650	95.8194438832719	150.891809858832	128.654327296497	102.366191086894	126.40151551647	123.012119501483	78.2718104211726	46.6396336676009	59.6008444917423	147.325406991187	131.25864585455	247.874812631832	172.7721330224	77.9460897010435	97.0707311781939	82.1148822583339	99.4196110997901	80.7890066040521	86.1752848124621	14.9722343238115	106.706067006198	101.417320880713	31.9922569725343	79.0789409746621	120.201209120246	86.1178836205339	245.482842737343	160.946408576665	116.625766357268	152.424355783999	12.2332628473922	195.314355754449	101.809943832195
ENSG00000062716	531.569772019104	283.780350189513	712.547043488289	535.675289101298	514.937717573807	493.146800501482	369.238757856401	494.128010748637	314.42965204305	583.493099373698	436.653761876138	247.040217303105	267.074054233829	343.108488310201	291.212193534582	1231.72323387501	493.784068462291	180.486078583521	415.536321006689	252.469301285271	342.82161953055	769.448804073233	106.945544736757	460.352406388211	671.52408828511	425.422345085438	2268.04800355154	774.408806484825	277.705300160132	558.573726164965	411.85318252887	1467.72993809593	2290.72373622439
ENSG00000062725	107.226520536042	83.6084042493833	29.6894601453454	69.8885641958716	58.5349300042713	64.8010272373885	70.8983790046853	88.8674100963748	78.8420620048244	149.437599206115	82.2554180688516	87.6325095163042	73.6518654717003	109.998687335117	114.804807066518	213.498693871668	46.3958185132354	50.7079935067987	85.7241053108262	56.145878714293	75.6780617065232	92.5984234128246	116.086189586053	55.0728338930682	56.0938975894483	88.70142012915	72.0438777598723	52.4825245358691	82.6317088988718	72.8986049401734	8.15550856492811	114.890797502617	106.900441023805
ENSG00000062822	0	4.27196226091739	0	2.46665520691312	6.78665855121986	10.9832249554896	7.37343141648727	3.15132659916223	1.40789396437186	0	3.50023055612135	0	0	0	5.60023449104965	0	3.31398703665967	9.02430392917603	0.902359003271854	8.6090347361916	3.02712246826093	4.40944873394403	0	4.23637183792833	0	0	0	3.49883496905794	0	0	0	0	0
ENSG00000063015	0	0	0	0	0.848332318902482	0	0	0	0	0	0	0	0	0	0	0	0	7.73511765357946	0	0.187152929047643	0	14.6981624464801	0.914064484929551	0	0	0	4.00243765332624	12.8290615532125	0	0	0	17.2336196253926	0
ENSG00000063046	59.3167985944064	45.0081738203797	72.5742359108443	53.8553053509363	41.5682836262216	29.6547073798219	55.0171421076358	57.3541441047525	81.6578499335682	8.97681691344151	113.757493073944	105.993606748292	19.9617205484048	41.5226832986867	72.8030483836454	0	159.071377759664	35.6674869581719	66.3233867404813	18.5281399757167	44.6500564068487	46.2992117064123	40.2188373369002	52.248586001116	59.2992631659883	76.6449164222752	29.3512094577258	29.1569580754829	28.2412169654372	41.6563456800991	76.118079939329	38.7756441571333	20.361988766439
ENSG00000063169	2.28141533055409	3.051401614941	0	5.34441961497842	13.5733171024397	10.9832249554896	6.23905735241231	0	6.57017183373537	0	14.8759798635157	0	1.3766703826486	0	6.53360690622459	0	0	7.73511765357946	10.8283080392623	0	13.6220511071742	33.8057736269042	0	15.5333634057372	0	0.861178836205339	6.6707294222104	2.33255664603863	5.75284049295943	0	0	0	0
ENSG00000063176	25.095568636095	12.5107466212581	0	11.5110576322612	30.5399634804894	18.6714824243323	7.37343141648727	15.7566329958111	3.75438390499164	39.603604029889	25.3766715318798	0	19.2733853570805	2.18540438414141	24.2676827945485	41.0574411291669	6.62797407331934	4.29728758532192	3.15825651145149	0.374305858095287	41.6229339385878	2.20472436697202	3.6562579397182	9.88486762183276	8.01341394134976	12.0565037068748	10.6731670755366	1.16627832301931	10.9826954865589	15.1477620654906	1.35925142748802	14.3613496878271	5.09049719160975
ENSG00000063177	739.178567099526	710.671436119758	781.822450494095	460.031196089296	814.399026146383	741.367684495547	821.854009422312	634.677177071272	856.938126314342	907.714604365056	976.564325157856	583.382134779968	890.705737573647	797.672600211613	1120.04689820993	583.01566403417	702.56525177185	723.233500609679	567.583813057997	732.890870150572	738.617882255667	668.766391314845	906.751969050114	761.134806881122	841.408463841725	1405.44386068711	593.694918576726	671.776314059125	812.719466005359	649.460298557909	634.770416636905	486.84975441734	789.027064699511
ENSG00000063180	0	0	56.0800913856524	11.099948431109	0.848332318902482	6.58993497329375	2.83593516018741	24.5803474734654	0	0	25.3766715318798	0	4.81834633927012	0	3.73348966069977	0	23.1979092566177	6.87566013651507	3.15825651145149	0	0	0	0.914064484929551	5.64849578390443	9.61609672961972	6.02825185343738	8.00487530665248	0	29.810173463517	0.946735129093162	0	0	0
ENSG00000063241	4.56283066110819	13.2735970249933	19.7929734302303	22.6110060633702	38.1749543506117	30.7530298753708	30.0609126979866	13.2355717164813	2.34648994061977	16.3694896656875	26.2517291709101	3.33838131490682	15.831709400459	13.8408944328956	19.6008207186738	0	69.5937277698531	48.1296209556055	46.4714886685005	30.8802332928612	31.7847859167398	16.1679786911281	16.4531607287319	46.6000902172116	16.0268278826995	29.2800804309815	25.3487718043995	34.9883496905794	16.7355359795183	5.68041077455897	35.3405371146885	24.4142944693061	5.09049719160975
ENSG00000063244	93.5380285527178	97.0345713551237	39.5859468604605	170.199209277005	100.951545949395	153.765149376854	172.992044771432	102.102981812856	117.793795019113	161.582704441947	128.633472937459	125.189299309006	86.0418989155378	67.7475359083836	136.272372615541	65.6919058066671	119.303533319748	138.802389005898	170.54585161838	193.141822777168	249.737603631527	113.175850837897	250.453668870697	108.73354384016	91.3529189313873	132.621540775622	265.495031003974	95.6348224875838	162.125504801584	108.874539845714	82.9143370767691	267.121104193585	249.434362388878
ENSG00000063245	84.4123672305015	42.5670525284269	59.3789202906908	59.610834167067	46.6582775396365	62.6043822462906	35.1655959863239	30.8830006717898	32.3815611805529	72.3425833612639	36.7524208392741	14.188120588354	28.2217428442964	37.1518745304039	47.601993173922	106.749346935834	13.2559481466387	43.4026046117514	45.5691296652287	50.1569849847684	123.355240581633	84.5144340672606	70.3829653395754	32.4788507574505	33.656338553669	40.475405301651	52.0316894932411	18.660453168309	38.1779414532762	39.7628754219128	48.9330513895687	165.155521410012	218.891379239219
ENSG00000063322	47.909721941636	33.717987845098	46.1836046705373	77.2885298166109	59.3832623231738	52.71947978635	45.9421495950361	51.0514909064281	53.4999706461309	115.642523767276	10.500691668364	37.5567897927018	58.5084912625657	110.727155463165	56.9357173256714	205.287205645835	99.4196110997901	35.2377581996397	35.6431806292383	15.9079989690497	24.9737603631527	20.5774274250721	35.6485149122525	55.0728338930682	30.4509729771291	33.5859746120082	76.0463154131986	41.9860196286953	64.8502019206335	35.029199776447	50.2923028170567	51.7008588761777	45.8144747244877
ENSG00000063438	0	0	0	5.7555288161306	5.93832623231738	0	15.314049865012	1.26053063966489	0	0	1.75011527806067	0	0	0	0	0	0	1.28918627559658	0	0	0	0	0.914064484929551	0	6.41073115307981	10.3341460344641	5.33658353776832	8.1639482611352	3.13791299615969	0	1.35925142748802	0	5.09049719160975
ENSG00000063587	2.28141533055409	12.358176540511	3.29882890503838	6.57774721843497	17.8149786969521	15.3765149376854	5.67187032037482	17.6474289553085	24.8727933705696	0.528048053731854	20.1263256976977	10.8497392734472	0	0	13.0672138124492	24.6344646775002	0	7.30538889504726	31.131385612879	101.249734614775	3.78390308532616	1.46981624464801	29.2500635177456	11.2969915678089	24.0402418240493	12.9176825430801	4.00243765332624	2.33255664603863	17.2585214788783	0	14.9517657023682	0	0
ENSG00000063601	29.6583992972032	28.9883153419395	0	64.133035379741	67.0182531932961	29.6547073798219	58.9874513318982	47.9001643072658	18.7719195249582	32.2109312776431	35.8773632002438	56.752482353416	45.430122627404	56.8205139876766	27.0678000400733	8.21148822583339	49.709805549895	43.4026046117514	21.6566160785245	18.5281399757167	16.6491735754351	35.2755898715522	55.7579335807026	18.3576112976894	27.2456074005892	55.9766243533471	66.707294222104	72.3092560271975	47.5916804417553	50.1769618419376	131.847388466338	31.5949693132197	10.1809943832195
ENSG00000063660	13.6884919833246	65.4525646404844	75.8730648158827	17.677695649544	82.2882349335408	62.6043822462906	65.2265086843105	63.656797303077	75.0876780998328	11.6170571821008	123.383127103277	60.0908636683228	27.5334076529721	169.733073834983	71.8696759684705	0	142.501442576366	96.6889706697432	87.0776438157339	56.8944904304836	47.6771788751096	40.4199467278203	164.531607287319	81.9031888666143	22.4375590357793	28.4189015947762	4.00243765332624	69.9766993811589	103.02814337391	46.3900213255649	138.643645603778	60.317668688874	15.2714915748292
ENSG00000063761	0	9.76448516781119	0	2.05554600576093	5.93832623231738	8.78657996439166	11.9109276727871	0	2.81578792874373	0.528048053731854	7.87551875127303	0.834595328726706	0	0	17.7340758883239	0	3.31398703665967	8.59457517064384	13.5353850490778	30.6930803638135	0	1.46981624464801	16.4531607287319	1.41212394597611	1.60268278826995	12.9176825430801	1.33414588444208	25.6581231064249	2.61492749679974	9.46735129093162	1.35925142748802	10.052944781479	0
ENSG00000063854	59.3167985944064	90.6266279637476	9.89648671511513	51.7997593451754	69.5632501500036	57.1127697685458	61.8233864920856	91.3884713757045	59.1315465036183	157.358320012092	41.1277090344258	17.5265019032608	62.6385024105115	123.839581768013	60.6692069863712	0	165.699351832983	49.4188072312021	88.8823618222777	103.495569763347	113.517092559785	15.4330705688041	114.258060616194	57.8970817850204	28.8482901888591	46.5036571550883	54.6999812621253	65.3115860890816	72.1719989116728	52.0704321001239	48.9330513895687	84.7319631581802	40.723977532878
ENSG00000063978	2.28141533055409	20.4443908201047	0	11.099948431109	25.4499695670745	0	18.1499850251994	0.630265319832445	11.7324497030989	36.4353157074979	16.6260951415764	0.834595328726706	12.3900334438374	21.1255757133669	28.9345448704232	24.6344646775002	3.31398703665967	16.3296928242233	7.67005152781076	23.9555749180984	20.4330766607613	26.4566924036642	36.562579397182	5.64849578390443	8.01341394134976	6.02825185343738	34.6877929954941	19.8267314913283	35.0400284571165	21.7749079691427	9.51475999241613	24.4142944693061	5.09049719160975
ENSG00000064012	196.201718427652	39.6682209942329	98.9648671511513	64.9552537820454	47.506609858539	76.8825746884271	52.7483939794859	20.7987555544707	24.4034953824457	144.685166722528	37.6274784783045	129.362275952639	51.6251393493227	33.5095338901682	18.6674483034988	197.075717420001	6.62797407331934	22.7756242022062	27.9731291014275	95.8222996723934	37.0822502361964	121.994748305785	86.8361260683073	67.7819494068532	27.2456074005892	71.4778434050432	158.763360248608	20.9930098143477	53.3445209347147	16.0944971945837	91.0698456416972	58.8815337200913	432.692261286828
ENSG00000064042	66.1610445860687	97.4922815973648	98.9648671511513	71.1218917993282	107.738204500615	69.1943172195843	73.1671271328352	86.9766141368774	52.092076681759	245.542344985312	54.2535736198809	38.3913851214285	52.313474540647	57.5489821157237	49.4687380042719	0	82.8496759164917	52.4269085409274	48.7273861766801	35.9333623771475	26.4873215972831	9.55380559021206	12.7969027890137	29.6546028654983	30.4509729771291	49.9483724999097	12.0073129599787	16.3278965222704	58.0513904289542	65.3247239074282	5.43700570995207	10.052944781479	15.2714915748292
ENSG00000064102	84.4123672305015	31.8871468761334	16.4941445251919	20.9665692587615	28.8432988426844	14.2781924421365	42.5390274028112	21.4290208743031	23.4648994061977	0	21.8764409757584	36.7221944639751	26.8450724616478	0	36.4015241918227	0	6.62797407331934	29.6512843387212	33.8384626226945	0.374305858095287	35.5686890020659	10.2887137125361	17.3672252136615	18.3576112976894	17.6295106709695	8.61178836205339	17.343896497747	11.6627832301931	18.8274779769581	6.62714590365213	2.71850285497604	18.6697545941753	5.09049719160975
ENSG00000064115	166.543319130449	41.8042021246916	92.3672093410745	40.2887017129142	101.799878268298	37.3429648486646	109.467097183234	104.624043092186	135.157820579699	218.083846191256	40.2526513953955	115.174155364285	86.0418989155378	238.93754599946	69.0695587229457	41.0574411291669	13.2559481466387	135.794287696173	51.8856426881316	218.781774056695	114.27387317685	36.0104979938762	155.390962438024	134.15177486773	81.7368222017676	163.623978879014	24.0146259199574	80.4732042883327	86.8155928937513	64.377988778335	33.9812856872005	86.1680981269629	91.6289494489754
ENSG00000064195	0	0	0	0	0	20.8681274154302	0.567187032037482	1.26053063966489	12.6710456793468	23.7621624179334	0	0	0	32.7810657621211	0.933372415174941	123.172323387501	0	6.87566013651507	0	0	11.3517092559785	0	7.31251587943641	0	0	5.16707301723204	2.66829176888416	0	4.70686949423953	0	114.177119908994	0	0
ENSG00000064199	2.28141533055409	0.457710242241149	62.6777491957291	78.9329666212197	4.24166159451241	12.0815474510385	53.3155810115233	83.1950222178828	7.03946982185932	196.961924041981	1.75011527806067	68.4368169555899	11.7016982525131	3.64234064023568	32.6680345311229	8.21148822583339	3.31398703665967	19.7675228924808	32.0337446161508	113.040369144777	10.5949286389133	0	7.31251587943641	25.4182310275699	11.2187795178897	0.861178836205339	4.00243765332624	120.126667270989	4.18388399487958	50.1769618419376	2.71850285497604	4.30840490634814	20.361988766439
ENSG00000064201	0	6.10280322988199	0	0	0	4.39328998219583	0	0	0	0	0	0.834595328726706	0	0	0	0	0	0	0	0	0	0	0	0	0	0.861178836205339	0	0	0	0	0	22.9781595005234	0
ENSG00000064205	0	0	0	0	0	0	4.53749625629986	0	0	0.528048053731854	4.37528819515168	0	0	0	0	0	3.31398703665967	1.28918627559658	0	0.187152929047643	0.756780617065232	0	0	0	0	1.72235767241068	0	0	1.56895649807984	0	0	0	106.900441023805
ENSG00000064225	2.28141533055409	16.0198584784402	19.7929734302303	33.2998452933271	22.904972610367	38.4412873442135	7.37343141648727	11.344775756984	21.5877074537019	0.528048053731854	5.25034583418202	0	16.5200445917833	26.953320737744	9.33372415174941	156.018276290834	0	22.345895443674	4.51179501635927	0.374305858095287	16.6491735754351	57.3228335412724	7.31251587943641	0	38.4643869184789	24.9741862499548	80.0487530665248	46.6511329207726	13.0746374839987	25.5618484855154	55.7293085270088	31.5949693132197	71.2669606825364
ENSG00000064270	4.56283066110819	47.9070053545736	42.8847757654989	127.032743156025	24.601637248172	23.0647724065281	32.3296608261365	73.1107771005636	54.9078646105027	170.031473301657	15.7510375025461	191.956925607142	23.4033965050263	37.1518745304039	84.9368897809197	8.21148822583339	62.9657536965337	39.5350457849617	85.2729258091902	148.973731521924	47.6771788751096	31.6010492599322	86.8361260683073	18.3576112976894	60.9019459542582	58.5601608619631	22.6804800355154	27.9906797524635	58.0513904289542	79.5257508438256	81.5550856492811	45.9563190010469	25.4524859580487
ENSG00000064300	0	0	0	0	2.54499695670745	3.29496748664687	4.53749625629986	0.630265319832445	1.40789396437186	0	10.500691668364	2.50378598618012	11.7016982525131	1.45693625609427	2.80011724552482	32.8459529033335	0	6.01620261945069	0	0	0	0	0	0	0	16.3623978879014	0	0	0	0	0	0	0
ENSG00000064309	2.28141533055409	14.6467277517168	0	4.11109201152186	5.08999391341489	0	0	6.30265319832445	7.50876780998328	12.1451052358326	7.00046111224269	0	7.57168710456733	13.1124263048484	15.867331057974	0	0	1.71891503412877	0	0	0.756780617065232	0	0	0	1.60268278826995	18.0847555603121	1.33414588444208	4.66511329207726	0	0	0	0	0
ENSG00000064313	88.9751978916096	82.845553845648	3.29882890503838	67.8330181901107	46.6582775396365	45.0312223175073	69.1968179085728	31.5132659916223	54.4385666223788	3.69633637612298	54.2535736198809	25.8724551905279	72.2751950890517	8.74161753656563	53.2022276649717	16.4229764516668	49.709805549895	47.2701634385411	48.2762066750442	58.2045609338171	55.244985045762	13.9632543241561	23.7656766081683	46.6000902172116	24.0402418240493	15.5012190516961	44.0268141865887	87.4708742264486	40.7928689500759	26.5085836146085	51.6515542445447	24.4142944693061	10.1809943832195
ENSG00000064393	257.799932352613	494.327061620441	158.343787441842	229.39893424292	138.278167981105	147.17521440356	203.620144501456	265.341699649459	242.627059860085	262.439882704731	105.881974322671	318.815415573602	298.737473034747	128.938858664343	267.877883155208	98.5378587100006	490.470081425631	207.129261612517	317.630369151693	207.178292455741	266.386777206962	86.7191584342326	213.891089473515	183.576112976894	403.876062644028	287.633731292583	166.76823555526	111.962719009854	316.406227112768	249.938074080595	225.635736963011	83.2958281893974	71.2669606825364
ENSG00000064419	41.0654759499737	87.1175161065654	131.953156201535	126.210524753721	130.643177110982	103.242314581602	163.349865226795	137.397839723473	170.82446767712	272.472795725636	117.257723630065	290.439174396894	150.745406900022	103.442474182693	86.8036346112695	49.2689293550003	112.675559246429	92.8214118429535	51.4344631864957	98.0681348209651	131.67982736935	32.3359573822562	124.312769950419	136.976022759683	81.7368222017676	99.035566163614	121.407275484229	117.794110624951	107.735012868149	100.353923683875	142.721399886242	126.379877252879	106.900441023805
ENSG00000064490	27.3769839666491	24.8689231617691	9.89648671511513	25.8998796725877	17.8149786969521	20.8681274154302	30.628099730024	17.017163635476	12.2017476912228	79.207208059778	17.5011527806067	24.2032645330745	4.81834633927012	8.74161753656563	5.60023449104965	0	0	24.0648104778027	27.5219495997916	64.567760521437	20.4330766607613	39.6850386054963	25.5938055780274	14.1212394597611	27.2456074005892	6.88943068964271	50.6975436087991	27.9906797524635	8.36776798975916	22.7216430982359	24.4665256947843	117.763067440183	0
ENSG00000064545	59.3167985944064	54.9252290689379	3.29882890503838	23.4332244656746	16.1183140591472	26.359739893175	44.2405884989236	6.9329185181569	40.8289249667841	39.0755559761572	26.2517291709101	14.188120588354	33.7284243748908	31.3241295060268	20.5341931338487	0	33.1398703665967	30.0810130972534	32.4849241177868	18.5281399757167	54.4882044286967	2.93963248929602	42.0469663067593	26.8303549735461	16.0268278826995	25.8353650861602	20.0121882666312	17.4941748452897	24.0573329705576	42.6030808091923	73.399577084353	61.7538036576567	5.09049719160975
ENSG00000064547	0	1.98341104971165	79.171893720921	29.5998624829574	17.8149786969521	23.0647724065281	15.8812368970495	49.7909602667632	27.2192833111894	62.3096703403587	26.2517291709101	8.34595328726706	5.50668153059442	0.728468128047135	13.0672138124492	114.960835161667	0	32.6593856484466	11.7306670425341	0.187152929047643	40.8661533215225	75.6955365993725	5.4843869095773	16.9454873517133	16.0268278826995	11.1953248706694	74.7121695287565	61.8127511200236	13.5976229833586	23.668378227329	0	147.92190178462	234.162870814048
ENSG00000064601	155.136242477678	145.094146790444	197.929734302303	129.088289161786	168.818131461594	257.007463958456	134.990513624921	74.3713077402285	175.517447558359	16.3694896656875	168.011066693825	87.6325095163042	134.225362308239	238.93754599946	112.938062236168	114.960835161667	119.303533319748	250.531866224268	157.461646070939	66.4392898119134	280.008828314136	159.475062544309	143.508124133939	179.339741138966	112.187795178897	158.456905861782	156.095068479723	95.6348224875838	137.022200832306	247.097868693315	40.7775428246406	267.121104193585	249.434362388878
ENSG00000064607	66.1610445860687	96.1191508706414	26.390631240307	68.2441273912629	72.108247106711	60.4077372551927	102.093665766747	98.3213898938614	48.8069907648913	91.8803613493425	41.1277090344258	89.3017001737576	67.4568487497816	120.925709255824	101.737593254069	8.21148822583339	109.361572209769	165.875300793426	201.226057729624	251.907842498128	96.1111383672845	69.0813634984565	170.015994196896	53.6607099470921	60.9019459542582	55.9766243533471	21.3463341510733	39.6534629826567	94.1373898847906	78.5790157147324	53.0108056720327	15.7974846566099	101.809943832195
ENSG00000064651	547.539679332982	571.680092559196	168.240274156957	245.843302289007	307.096299442699	318.513523709198	327.834104517665	295.594435001417	486.192715696417	257.159402167413	275.643156294556	262.062933220186	343.479260470827	563.105862980436	418.150841998374	98.5378587100006	394.364457362501	533.723118096982	353.724729282567	489.779215317683	225.520623885439	257.952750935726	320.836634210272	186.400360868846	338.16606832496	389.252833964813	166.76823555526	299.733529015964	506.772948879789	286.860744115228	420.008691093798	163.719386441229	66.1764634909267
ENSG00000064652	4.56283066110819	40.5836414787152	29.6894601453454	4.93331041382623	34.7816250750018	13.1798699465875	51.6140199154109	31.5132659916223	17.3640255605863	1.05609610746371	40.2526513953955	8.34595328726706	40.6117762881338	75.7606853169021	51.3354828346218	0	16.5699351832983	28.7918268216569	41.9596936521412	43.045173680958	26.4873215972831	24.9868761590162	0.914064484929551	33.8909747034266	6.41073115307981	55.1154455171417	14.6756047288629	9.33022658415451	15.1665794814385	41.6563456800991	106.021611344065	31.5949693132197	10.1809943832195
ENSG00000064655	173.387565122111	177.133863747325	369.468837364298	104.832846293807	100.103213630493	91.1607671305635	166.185800386982	54.2028175055903	125.302562829096	121.451052358326	79.6302451517606	80.1211515577638	73.6518654717003	100.528601670505	174.540641637714	24.6344646775002	208.781183309559	117.315951079288	147.986876536584	104.431334408585	99.8950414526107	44.8293954617643	137.109672739433	86.1395607045426	110.585112390627	141.233329137676	29.3512094577258	106.131327394758	109.826954865589	74.7920751983598	81.5550856492811	24.4142944693061	55.9954691077072
ENSG00000064666	143.729165824908	86.2020956220831	445.341902180181	129.499398362939	89.9232258036631	117.520507023738	106.631162023047	22.689551513968	108.407835256634	63.8938145015543	81.3803604298213	225.340738756211	57.8201560712414	65.5621315242422	86.8036346112695	632.284593389171	245.235040712816	116.886222320756	104.673644379535	52.0285142752449	146.05865909359	368.923877406651	213.891089473515	124.266907245898	176.295106709695	93.868493146382	765.799737669754	185.438253360071	37.1319704545563	102.247393942061	12.2332628473922	789.874232830493	921.379991681364
ENSG00000064687	4.56283066110819	34.7859784103274	52.781262480614	55.4997421555451	16.1183140591472	112.028894545994	22.6874812814993	41.5975111089414	38.9517330142883	92.4084094030744	13.125864585455	25.0378598618012	22.715061313702	96.886261030269	53.2022276649717	82.1148822583339	0	26.6431830289959	8.12123102944669	51.6542084171496	37.8390308532616	16.9028868134521	43.8750952766184	28.2424789195222	51.2858492246385	31.8636169395976	32.0195012266099	34.9883496905794	22.4883764724778	51.1236969710307	23.1072742672963	33.0311042820024	86.5384522573657
ENSG00000064692	0	0	3.29882890503838	33.2998452933271	2.54499695670745	13.1798699465875	18.7171720572369	6.9329185181569	7.97806579810723	0	0	0	0	0	33.6014069462979	0	0	15.0405065486267	0	0.56145878714293	15.1356123413046	0	30.1641280026752	5.64849578390443	8.01341394134976	12.0565037068748	2.66829176888416	12.8290615532125	0	19.8814377109564	2.71850285497604	1.43613496878271	0
ENSG00000064703	20.5327379749868	7.32336387585839	0	11.9221668334134	27.1466342048794	2.19664499109792	11.3437406407496	9.45397979748668	17.8333235487103	2.64024026865927	14.0009222244854	0	6.19501672191872	21.8540438414141	10.2670965669244	8.21148822583339	9.94196110997901	3.43783006825754	12.18184654417	15.5336931109544	5.29746431945663	0.734908122324005	3.6562579397182	2.82424789195222	9.61609672961972	5.16707301723204	2.66829176888416	4.66511329207726	18.8274779769581	12.3075566782111	1.35925142748802	14.3613496878271	0
ENSG00000064726	0	0.15257008074705	0	8.6332932241959	14.4216494213422	12.0815474510385	5.10468328833734	1.89079595949734	7.03946982185932	0	15.7510375025461	10.8497392734472	24.7800668876749	49.5358327072052	24.2676827945485	0	0	3.86755882678973	7.67005152781076	30.1316215766706	4.54068370239139	26.4566924036642	3.6562579397182	24.0061070815938	9.61609672961972	9.47296719825873	0	5.83139161509657	21.4424054737579	7.57388103274529	2.71850285497604	4.30840490634814	0
ENSG00000064763	52.4725526027442	0.457710242241149	0	13.1554944368699	4.24166159451241	0	7.37343141648727	0	2.81578792874373	0	1.75011527806067	0.834595328726706	3.44167595662151	0.728468128047135	0	0	0	1.28918627559658	24.3636930883401	0	3.78390308532616	16.9028868134521	0.914064484929551	5.64849578390443	30.4509729771291	3.44471534482136	28.0170635732837	4.66511329207726	10.9826954865589	7.57388103274529	2.71850285497604	24.4142944693061	0
ENSG00000064787	221.297287063747	386.460014532277	475.031362325526	332.998452933271	449.616129018316	278.973913869435	346.551276574902	635.307442391105	337.894551449248	182.704626591221	164.510836137703	434.824166266614	302.179148991369	379.531894712558	304.279407347031	123.172323387501	636.285511038657	253.110238775461	515.698170369865	605.252572540079	369.308941127833	144.041991975505	258.680249235063	208.994344004464	336.56338553669	339.304461464904	54.6999812621253	267.077735971423	259.400807682534	378.694051637265	148.158405596194	77.5512883142666	91.6289494489754
ENSG00000064886	0	0	0	0	0	0	0	0	13.6096416555947	0	0	0	0	0	0	0	0	0	0	0	9.83814802184802	5.14435685626804	0.914064484929551	0	4.80804836480986	3.44471534482136	17.343896497747	0	0	4.73367564546581	0	0	0
ENSG00000064932	88.9751978916096	64.6897142367491	105.562524961228	112.643921115699	98.406548992688	188.911469234421	76.0030622930226	79.4134302988881	145.482376318426	53.8609014806491	90.1309368201247	80.1211515577638	57.1318208799171	25.4963844816497	54.1356000801466	656.919058066671	294.944846262711	57.5836536433137	182.276518660915	124.082391958588	212.65535339533	212.388447351637	137.109672739433	81.9031888666143	147.446816520836	48.226014827499	1027.2923310204	124.791780563067	53.8675064340746	112.661480362086	816.910107920299	840.138956737888	1410.0677220759
ENSG00000064933	20.5327379749868	14.9518679132109	23.0918023352686	19.3221324541527	23.7533049292695	16.4748374332344	44.8077755309611	27.1014087527951	13.1403436674707	62.3096703403587	19.2512680586674	3.33838131490682	20.6500557397291	40.0657470425924	33.6014069462979	0	6.62797407331934	37.8161307508329	12.633026045806	13.4750108914303	18.9195154266308	1.46981624464801	58.5001270354913	14.1212394597611	17.6295106709695	13.7788613792854	10.6731670755366	0	24.0573329705576	35.9759349055401	0	1.43613496878271	0
ENSG00000064961	61.5982139249605	203.22334755507	62.6777491957291	93.3217886615462	93.3165550792731	103.242314581602	215.531072174243	110.296430970678	149.236760223418	181.648530483758	78.7551875127303	127.693085295186	163.13544034386	138.408944328956	96.137358763019	73.9033940325005	238.607066639496	114.307849769563	140.768004510409	278.483558422893	163.46461328609	51.4435685626804	105.117415766898	100.260800164304	125.009257485056	118.842679396337	64.0390024532199	118.96038894797	180.952982778542	149.58415039672	231.072742672963	132.12441712801	142.533921365073
ENSG00000064989	0	0	0	0.411109201152186	0	0	0	0	0	0	5.25034583418202	0.834595328726706	0	0	1.86674483034988	0	3.31398703665967	0	0	0	0	0	20.1094186684501	0	6.41073115307981	23.2518285775442	1.33414588444208	0	0	0	1.35925142748802	0	0
ENSG00000064995	63.8796292555146	79.0313018269718	98.9648671511513	85.5107138396547	103.496542906103	75.7842521928781	27.2249775377992	125.422798646657	139.850800460939	38.0194598686935	79.6302451517606	176.934209690062	117.705317716456	24.0394482255555	56.9357173256714	0	3.31398703665967	65.7485000554254	64.5186687339376	43.6066324681009	49.9475207263053	42.6246710947923	85.0079970984482	43.7758423252594	60.9019459542582	94.7296719825873	20.0121882666312	113.128997332873	21.9653909731178	89.9398372638504	48.9330513895687	97.6571778772246	10.1809943832195
ENSG00000064999	0	15.409578155452	26.390631240307	41.1109201152186	7.63499087012234	43.9328998219583	23.2546683135368	4.41185723882712	11.7324497030989	156.830271958361	22.7514986147888	1.66919065745341	39.2351059054852	8.01314940851849	23.3343103793735	8.21148822583339	36.4538574032564	26.6431830289959	12.633026045806	28.4472452152418	38.5958114703269	1.46981624464801	26.507870062957	14.1212394597611	19.2321934592394	24.9741862499548	9.33902119109456	17.4941748452897	28.2412169654372	27.4553187437017	4.07775428246406	34.4672392507851	50.9049719160975
ENSG00000065000	346.775130244222	177.286433828072	201.228563207341	235.976681461355	258.741357265257	220.762821605341	88.4811769978472	119.120145448332	142.666588389682	183.760722698685	193.387738225704	142.715801212267	116.328647333807	130.395794920437	131.605510539667	295.613576130002	225.351118492858	130.637542593786	151.145133048036	177.233823808118	124.868801815763	220.472436697202	182.81289698591	159.5700058953	88.1475533548474	102.480281508435	204.124320319638	114.295275655893	120.286664852788	156.211296300372	191.654451275811	133.560552096792	45.8144747244877
ENSG00000065029	57.0353832638523	38.6002304290036	23.0918023352686	33.7109544944792	14.4216494213422	25.261417397626	39.7030922426238	34.6645925907845	40.8289249667841	11.0890091283689	18.3762104196371	30.8800271628881	9.63669267854023	3.64234064023568	32.6680345311229	82.1148822583339	59.651766659874	41.6836895776226	67.2257457437532	28.4472452152418	76.4348423235885	19.1076111804241	74.0392232792936	26.8303549735461	33.656338553669	26.6965439223655	4.00243765332624	8.1639482611352	8.89075348911911	48.2834915837512	57.0885599544968	35.9033742195679	5.09049719160975
ENSG00000065054	6.84424599166228	28.9883153419395	0	56.7330697590017	60.2315946420762	71.3909622106823	53.8827680435608	23.9500821536329	95.7367895772868	56.5011417493083	22.7514986147888	20.8648832181677	36.481765140188	53.906641475488	35.4681517766478	65.6919058066671	106.047585173109	27.0729117875281	69.9328227535687	91.1434764462023	17.4059541925003	40.4199467278203	3.6562579397182	45.1879662712355	28.8482901888591	97.3132084912033	14.6756047288629	48.9836895668112	35.5630139564765	88.046367005664	1.35925142748802	8.61680981269629	0
ENSG00000065057	2.28141533055409	0	3.29882890503838	13.1554944368699	30.5399634804894	23.0647724065281	9.6421795446372	3.15132659916223	16.4254295843384	32.2109312776431	19.2512680586674	10.0151439447205	31.6634188009179	2.91387251218854	14.9339586427991	0	6.62797407331934	3.43783006825754	3.15825651145149	77.8556184838197	6.81102555358709	36.0104979938762	30.1641280026752	32.4788507574505	20.8348762475094	31.0024381033922	22.6804800355154	20.9930098143477	21.9653909731178	44.4965510673786	190.295199848323	14.3613496878271	0
[truncated: 18,360 more rows]
