# Supplementary material for: Inflammatory pathways are upregulated in the nasal epithelium in patients with idiopathic pulmonary fibrosis
Source: Respir Res. 2018 Nov 26;19:233. doi: 10.1186/s12931-018-0932-7 (PMC6257973; doi:10.1186/s12931-018-0932-7)
Supplement: Supplementary file 7 — Table S9. a Differentially expressed genes (Control Group Male vs Female) obtained using EdgeR glmLRT normalization. b Differentially expressed genes (Control Group Male vs Female) obtained using EdgeR glmLRT normalization with RUV. (XLS 105 kb) [file 12931_2018_932_MOESM7_ESM.xls]

## Sheet: TableSupp9abc
Supplementary Table 9a. Differentially expressed genes (Control Group Male vs Female) obtained using EdgeR glmLRT normalization
ensembl_gene_id	logFC	logCPM	LR	PValue	FDR	entrezgene	hgnc_symbol	chromosome_name	start_position	end_position	gene_biotype
ENSG00000012124	-5.06051	0.888674	12.7762	0.000351053	0.0469508	933	CD22	19	35319261	35347355	protein_coding
ENSG00000012817	7.07278	2.36778	37.7255	8.14321e-10	1.80891e-06	8284	KDM5D	Y	19703865	19744939	protein_coding
ENSG00000013293	4.78418	0.449292	15.1605	9.87491e-05	0.0247165	57709	SLC7A14	3	170459584	170586074	protein_coding
ENSG00000067048	6.20521	4.03717	89.2303	3.51425e-21	2.08172e-17	8653	DDX3Y	Y	12904108	12920478	protein_coding
ENSG00000067646	5.24961	1.01501	18.7725	1.47277e-05	0.00872422	7544	ZFY	Y	2935281	2982506	protein_coding
ENSG00000071909	4.00606	0.54906	14.6381	0.000130256	0.0261388	140469	MYO3B	2	170178145	170655171	protein_coding
ENSG00000080947	4.62046	0.385143	14.5953	0.000133249	0.0263108	114819	CROCCP3	1	16467436	16499257	transcribed_unprocessed_pseudogene
ENSG00000089558	5.25487	0.646367	16.3164	5.35993e-05	0.0164226	23415	KCNH4	17	42156891	42181278	protein_coding
ENSG00000092098	5.77147	0.69983	18.426	1.76631e-05	0.0094322	55072	RNF31	14	24146683	24160661	protein_coding
ENSG00000099725	6.25571	3.30322	45.2472	1.73672e-11	4.40904e-08	5616	PRKY	Y	7273972	7381548	transcribed_unprocessed_pseudogene
ENSG00000102109	3.91355	0.406725	14.5696	0.000135079	0.0263791	27344	PCSK1N	X	48831094	48835633	protein_coding
ENSG00000102313	5.14306	0.608885	16.0281	6.24104e-05	0.0176047	347365	ITIH6	X	54748899	54798240	protein_coding
ENSG00000104267	-5.20331	1.8554	13.308	0.000264275	0.0384954	760	CA2	8	85463852	85481493	protein_coding
ENSG00000105609	4.40494	0.776624	14.4004	0.00014777	0.0281107	10990	LILRB5	19	54249431	54257301	protein_coding
ENSG00000106823	-6.00806	1.63768	13.5273	0.000235124	0.0354101	1842	ECM2	9	92493554	92536655	protein_coding
ENSG00000107815	-5.21723	2.24897	22.9946	1.6246e-06	0.00222083	56652	TWNK	10	100987367	100994401	protein_coding
ENSG00000109674	-6.59074	2.06866	14.6963	0.000126296	0.0260977	55247	NEIL3	4	177309836	177362943	protein_coding
ENSG00000110169	4.92521	1.20336	14.8034	0.000119319	0.0256617	3263	HPX	11	6431049	6442617	protein_coding
ENSG00000113555	5.04231	0.75057	16.6457	4.50515e-05	0.0152014	51294	PCDH12	5	141943585	141969741	protein_coding
ENSG00000113594	-2.3448	5.21286	14.9466	0.000110599	0.0252797	3977	LIFR	5	38474963	38608354	protein_coding
ENSG00000114374	7.09791	2.45686	47.404	5.77648e-12	1.7109e-08	8287	USP9Y	Y	12701231	12860839	protein_coding
ENSG00000115361	4.71731	1.44684	13.1401	0.000289044	0.0404457	33	ACADL	2	210187939	210225491	protein_coding
ENSG00000120279	5.78692	0.971722	20.8908	4.8622e-06	0.00432031	80177	MYCT1	6	152697895	152724567	protein_coding
ENSG00000124159	-5.58252	1.31037	12.6885	0.000367915	0.0480751	8785	MATN4	20	45293445	45308529	protein_coding
ENSG00000125046	6.20052	1.63227	16.5761	4.67351e-05	0.0153539	51066	SSUH2	3	8619400	8745040	protein_coding
ENSG00000129824	5.90266	5.27057	110.041	9.59825e-26	1.7057e-21	6192	RPS4Y1	Y	2841486	2932000	protein_coding
ENSG00000131002	5.4632	3.52424	51.3563	7.70363e-13	2.73802e-09	246126	TXLNGY	Y	19567313	19606274	transcribed_unprocessed_pseudogene
ENSG00000135314	-5.44774	1.21175	16.038	6.20855e-05	0.0176047	80759	KHDC1	6	73241314	73310365	protein_coding
ENSG00000137766	5.18377	1.22159	16.8496	4.04625e-05	0.0143812	440279	UNC13C	15	54012904	54633414	protein_coding
ENSG00000139304	5.01132	0.522539	15.2582	9.37699e-05	0.0238055	374462	PTPRQ	12	80402178	80680234	protein_coding
ENSG00000149654	4.57668	0.362677	14.2601	0.000159201	0.0282915	64405	CDH22	20	46173733	46308498	protein_coding
ENSG00000153404	4.97784	0.982622	18.4814	1.71573e-05	0.0094322	153478	PLEKHG4B	5	92151	189972	protein_coding
ENSG00000153902	4.57891	1.33182	14.9492	0.000110447	0.0252797	163175	LGI4	19	35124513	35142451	protein_coding
ENSG00000154118	5.04608	1.40351	13.7003	0.00021442	0.0336145	57338	JPH3	16	87601835	87698156	protein_coding
ENSG00000154620	6.06314	1.06058	33.4289	7.39173e-09	1.45954e-05	9087	TMSB4Y	Y	13703567	13706024	protein_coding
ENSG00000156113	-4.77353	2.67181	13.6354	0.000221965	0.0340046	3778	KCNMA1	10	76869601	77638369	protein_coding
ENSG00000158477	4.58698	0.352755	13.8978	0.000193023	0.0318758	909	CD1A	1	158254137	158258269	protein_coding
ENSG00000161634	4.75824	0.790631	12.5241	0.000401746	0.0488547	117159	DCD	12	54644591	54648493	protein_coding
ENSG00000163661	4.7695	1.7545	18.4576	1.7373e-05	0.0094322	5806	PTX3	3	157436789	157443628	protein_coding
ENSG00000163746	5.45061	1.13558	17.6472	2.65912e-05	0.0115504	57047	PLSCR2	3	146391421	146495991	protein_coding
ENSG00000164404	5.20701	0.639716	16.2318	5.60451e-05	0.016881	2661	GDF9	5	132861181	132866884	protein_coding
ENSG00000164509	7.12758	1.56714	19.1217	1.22643e-05	0.00751548	133396	IL31RA	5	55851379	55922853	protein_coding
ENSG00000164749	-5.26271	1.10412	13.4041	0.000251079	0.0374952	3174	HNF4G	8	75407914	75566843	protein_coding
ENSG00000165246	6.13463	1.11452	32.4441	1.22671e-08	2.17998e-05	22829	NLGN4Y	Y	14522638	14845650	protein_coding
ENSG00000166006	4.5467	0.356354	14.3779	0.000149547	0.0281107	3747	KCNC2	12	75040077	75209868	protein_coding
ENSG00000166896	-4.81263	1.58865	12.5543	0.000395303	0.0484478	91419	ATP23	12	57941541	57957269	protein_coding
ENSG00000168152	-5.42365	1.21282	13.2188	0.000277154	0.0394025	79725	THAP9	4	82900684	82919969	protein_coding
ENSG00000170209	5.33758	1.41027	18.1739	2.01626e-05	0.0102374	255239	ANKK1	11	113387791	113400418	protein_coding
ENSG00000170579	5.01265	0.544595	15.8199	6.96642e-05	0.0189381	9229	DLGAP1	18	3496032	4455335	protein_coding
ENSG00000172673	-4.78164	0.81118	12.6373	0.000378136	0.0480872	387357	THEMIS	6	127708072	127918631	protein_coding
ENSG00000176728	4.9555	0.743278	20.6036	5.6491e-06	0.00456319	NA	TTTY14	Y	18872501	19077416	lincRNA
ENSG00000177875	4.8222	0.806709	12.7175	0.000362259	0.0476866	387856	CCDC184	12	48183584	48185926	protein_coding
ENSG00000178093	-6.58415	2.00807	13.2431	0.00027358	0.0392079	83983	TSSK6	19	19512418	19515685	protein_coding
ENSG00000178385	5.19104	0.631262	19.3332	1.09779e-05	0.00723545	389072	PLEKHM3	2	207821288	208025560	protein_coding
ENSG00000180221	4.52381	0.704232	12.5047	0.000405923	0.0488547	NA	TPT1P10	10	58212541	58213036	processed_pseudogene
ENSG00000183878	5.94984	1.55974	22.3365	2.28815e-06	0.00271084	7404	UTY	Y	13248379	13480673	protein_coding
ENSG00000187123	-6.07336	1.66444	15.1217	0.000100796	0.0248783	130574	LYPD6	2	149329985	149474148	protein_coding
ENSG00000187186	-4.8512	0.850337	13.6539	0.000219786	0.0339636	730098		9	34664163	34666112	protein_coding
ENSG00000187686	5.42029	0.921512	14.7774	0.000120977	0.0256617	NA	KRT18P59	11	125113161	125126781	transcribed_processed_pseudogene
ENSG00000188100	5.62452	1.40609	17.5972	2.72983e-05	0.0115504	643161	FAM25A	10	87020306	87024730	protein_coding
ENSG00000188295	-4.69559	2.01751	16.5363	4.77266e-05	0.0153539	79862	ZNF669	1	247099962	247104372	protein_coding
ENSG00000188763	-5.22391	1.07104	12.7966	0.000347249	0.0469508	8326	FZD9	7	73433783	73436120	protein_coding
ENSG00000189045	4.34476	1.75627	20.9664	4.67404e-06	0.00432031	728780	ANKDD1B	5	75611459	75671846	protein_coding
ENSG00000196466	-5.40608	2.63873	12.5963	0.000386513	0.0482188	90576	ZNF799	19	12390016	12401271	protein_coding
ENSG00000197847	5.70276	0.872048	19.4842	1.01436e-05	0.00721051	NA	SLC22A20P	11	65213840	65242757	transcribed_unitary_pseudogene
ENSG00000198077	4.99667	4.1791	14.901	0.000113302	0.0252797	1549	CYP2A7	19	40875439	40882752	protein_coding
ENSG00000198692	5.8803	3.2383	58.4087	2.12949e-14	9.4608e-11	9086	EIF1AY	Y	20575725	20593154	protein_coding
ENSG00000199347	6.22	1.20332	21.5769	3.39927e-06	0.00355343	26829	RNU5E-1	1	11908152	11908271	snRNA
ENSG00000205559	-4.9466	0.90078	14.3518	0.000151636	0.0281107	100144603	CHKB-AS1	22	50583026	50583877	antisense_RNA
ENSG00000205625	5.98387	1.46365	13.6897	0.000215635	0.0336145	NA		6	154706643	154707795	processed_pseudogene
ENSG00000207105	-5.54812	1.28763	13.9833	0.000184437	0.0312156	NA		15	48995912	48996022	misc_RNA
ENSG00000207177	4.66723	0.400642	14.7501	0.000122742	0.0256617	NA		5	110684794	110684927	snoRNA
ENSG00000207313	5.99042	1.02883	24.0415	9.42822e-07	0.00139624	677794	SNORA2B	12	48667457	48667593	snoRNA
ENSG00000213203	-6.46972	1.88463	14.8865	0.000114179	0.0252797	170575	GIMAP1	7	150716557	150724284	protein_coding
ENSG00000213272	5.54961	0.793873	17.1375	3.47682e-05	0.013783	NA	RPL7AP9	12	76599671	76600470	processed_pseudogene
ENSG00000214465	4.63296	0.567155	15.423	8.59344e-05	0.0227931	NA	SMARCE1P6	2	26149204	26150731	processed_pseudogene
ENSG00000215009	4.84255	0.636808	13.2807	0.000268153	0.0387427	341392	ACSM4	12	7304284	7328724	protein_coding
ENSG00000215160	5.85347	1.17318	14.3102	0.000155019	0.0281107	NA	OR7E122P	3	8682943	8693701	transcribed_unprocessed_pseudogene
ENSG00000220472	3.95894	0.89189	13.9545	0.000187291	0.0313996	NA		6	7338839	7339568	processed_pseudogene
ENSG00000221883	4.32753	0.885536	13.7341	0.000210597	0.0336145	646450	ARIH2OS	3	48917788	48919385	protein_coding
ENSG00000222267	4.89995	0.4748	16.5104	4.83833e-05	0.0153539	NA	RNU6-892P	8	20229779	20229877	snRNA
ENSG00000223343	3.7868	0.129126	12.5004	0.00040687	0.0488547	NA		3	48985049	48989988	antisense_RNA
ENSG00000224186	5.48313	1.61837	17.6379	2.67209e-05	0.0115504	NA	C5orf66	5	135033280	135358219	antisense_RNA
ENSG00000226149	4.76852	0.758885	12.6309	0.000379418	0.0480872	NA		6	129526626	129552587	lincRNA
ENSG00000227053	4.50185	2.46724	19.3306	1.0993e-05	0.00723545	102724094		7	101014320	101017608	antisense_RNA
ENSG00000228486	2.61323	2.53441	14.9272	0.000111738	0.0252797	728537	C2orf92	2	97664217	97703064	protein_coding
ENSG00000229807	-5.6236	8.19084	93.8733	3.36382e-22	2.98892e-18	7503	XIST	X	73820651	73852753	lincRNA
ENSG00000230069	6.10916	0.91815	17.1125	3.5229e-05	0.013783	NA	LRRC37A15P	4	102727274	102730721	processed_pseudogene
ENSG00000230148	-6.22703	2.5088	28.9853	7.2929e-08	0.00011782	100874362	HOXB-AS1	17	48543551	48551250	antisense_RNA
ENSG00000230939	5.05516	0.544719	15.8018	7.03347e-05	0.0189381	NA		6	8784178	8785445	lincRNA
ENSG00000231177	-5.05183	1.39405	14.0608	0.000176994	0.0305375	84657	LINC00852	3	10284419	10285746	antisense_RNA
ENSG00000231890	-6.47048	1.85903	12.6215	0.000381339	0.0480872	NA	DARS-AS1	2	135985176	136022593	antisense_RNA
ENSG00000233864	5.36312	1.47748	22.7509	1.84413e-06	0.00234086	64595	TTTY15	Y	12662334	12692233	lincRNA
ENSG00000234222	4.95393	1.13305	16.6338	4.53366e-05	0.0152014	105371260	LIX1L-AS1	1	145926590	145959179	antisense_RNA
ENSG00000234636	4.2961	0.64315	13.0964	0.000295871	0.0410775	100873985	MED14OS	X	40735400	40738701	protein_coding
ENSG00000235172	5.90788	0.801186	20.2732	6.71353e-06	0.00497109	NA	LINC01366	5	170331429	170333879	lincRNA
ENSG00000235501	-4.286	1.95402	13.8014	0.00020318	0.0331257	729970		1	94927566	94963270	antisense_RNA
ENSG00000235652	5.74609	0.87248	17.0077	3.72284e-05	0.013783	100507557		6	145799409	145886585	antisense_RNA
ENSG00000235978	-5.01364	0.952985	13.5796	0.00022866	0.0347309	NA		3	4814294	4887293	antisense_RNA
ENSG00000237054	6.17599	1.51001	14.0139	0.00018146	0.031007	NA	PRMT5-AS1	14	22918947	22926900	antisense_RNA
ENSG00000239115	5.76685	0.91309	17.6734	2.62267e-05	0.0115504	NA	RNU7-67P	8	101307367	101307428	snRNA
ENSG00000239168	5.90328	0.83098	16.7401	4.28664e-05	0.0149368	NA	RNU7-197P	4	148991572	148991633	snRNA
ENSG00000239388	4.57682	0.695185	14.8693	0.000115225	0.0252797	142686	ASB14	3	57268347	57292682	protein_coding
ENSG00000239627	5.23145	0.640604	16.3482	5.27064e-05	0.0164226	NA	RPL12P20	4	41389115	41389593	processed_pseudogene
ENSG00000240674	-7.60293	2.60566	14.904	0.000113122	0.0252797	NA		4	165012366	165012845	processed_pseudogene
ENSG00000240893	-5.72602	1.40825	12.5761	0.000390721	0.0482188	101929694	LINC02042	3	112736447	112749319	lincRNA
ENSG00000243403	-5.24306	1.53051	13.1903	0.000281402	0.0396889	NA		15	64592979	64593326	processed_pseudogene
ENSG00000243566	6.7999	1.35296	21.0474	4.48056e-06	0.00432031	105375355	UPK3B	7	76510428	76516521	protein_coding
ENSG00000247796	-4.92259	1.90041	13.0477	0.000303651	0.0418309	257396		5	53109842	53115126	antisense_RNA
ENSG00000248474	-4.87116	0.858529	13.7332	0.000210699	0.0336145	NA	LINC02122	5	74084068	74103216	lincRNA
ENSG00000249631	6.31393	1.2598	20.7556	5.21778e-06	0.00441548	NA		4	11625714	11813958	lincRNA
ENSG00000250075	-5.02875	0.950705	14.644	0.00012985	0.0261388	101927237		4	67417305	67468251	lincRNA
ENSG00000251669	5.7582	1.65834	16.0662	6.11674e-05	0.0176047	348926	FAM86EP	4	3941760	3955419	transcribed_unprocessed_pseudogene
ENSG00000253878	4.98518	1.27341	14.4656	0.000142746	0.0275733	NA		8	94950037	94951396	sense_intronic
ENSG00000254473	4.71082	0.596035	13.3346	0.00026056	0.0382679	NA		9	83707594	83713378	antisense_RNA
ENSG00000254815	5.15697	0.612762	18.3851	1.8046e-05	0.0094322	692247		11	557595	560107	antisense_RNA
ENSG00000256377	4.99469	1.328	14.6287	0.000130907	0.0261388	NA		12	27696388	27710770	antisense_RNA
ENSG00000256973	5.07289	0.574096	15.9106	6.64073e-05	0.0184394	NA		12	22460519	22463914	lincRNA
ENSG00000256982	-4.63445	1.42417	14.7624	0.000121941	0.0256617	NA		16	89046172	89052965	lincRNA
ENSG00000257605	4.54989	0.351817	14.2271	0.000162019	0.0285072	NA		12	53298655	53300314	antisense_RNA
ENSG00000258449	4.94058	0.876067	12.8375	0.000339737	0.046442	NA		12	25096868	25100980	antisense_RNA
ENSG00000259120	-7.5393	2.80816	17.0086	3.72101e-05	0.013783	100130933	SMIM6	17	75646243	75647977	protein_coding
ENSG00000259702	5.47091	1.16091	14.8847	0.000114288	0.0252797	NA		15	96045341	96064357	lincRNA
ENSG00000260185	5.8768	1.01828	20.3887	6.32012e-06	0.00488326	NA		16	71655027	71664212	antisense_RNA
ENSG00000261465	5.11363	1.33238	22.0258	2.69013e-06	0.00298789	NA		16	19062499	19067691	antisense_RNA
ENSG00000261572	-5.51699	1.71687	13.891	0.000193719	0.0318758	NA		3	32236688	32238578	sense_intronic
ENSG00000264548	5.19786	1.31154	17.6912	2.59828e-05	0.0115504	NA		17	82214227	82217352	antisense_RNA
ENSG00000264743	5.78838	0.907386	17.081	3.58183e-05	0.013783	NA	DPRXP4	17	30975387	30975954	processed_pseudogene
ENSG00000264772	-5.74214	1.43662	14.323	0.000153971	0.0281107	NA		17	7572826	7582024	processed_transcript
ENSG00000266368	4.79388	0.777876	12.7745	0.000351384	0.0469508	NA		17	11953889	11977594	antisense_RNA
ENSG00000266770	4.16272	0.527133	12.6651	0.000372535	0.0480872	NA	RN7SL619P	19	13815062	13815319	misc_RNA
ENSG00000269927	5.6411	0.862705	17.2857	3.21601e-05	0.0132911	NA		14	71141125	71143253	lincRNA
ENSG00000270117	4.87645	0.479663	15.2662	9.3373e-05	0.0238055	NA		11	65498010	65498405	lincRNA
ENSG00000271079	4.94865	0.496123	15.0856	0.000102743	0.0250117	441294	CTAGE15	7	143571801	143574387	protein_coding
ENSG00000271917	-6.89758	2.2216	12.7254	0.000360713	0.0476866	NA		1	164828436	164829952	sense_intronic
ENSG00000273113	5.65728	0.835608	19.2156	1.16758e-05	0.0074104	NA		2	241581922	241582726	lincRNA
ENSG00000273906	5.49016	0.761956	16.918	3.90296e-05	0.014155	NA		Y	6918682	6920791	sense_intronic
ENSG00000274303	4.96214	1.24856	12.5797	0.000389962	0.0482188	NA		11	120365666	120365963	misc_RNA
ENSG00000274849	-4.39937	0.60172	14.1725	0.000166794	0.0290598	NA		18	36189824	36190272	sense_intronic
ENSG00000276043	5.03867	0.723515	17.6	2.72585e-05	0.0115504	29128	UHRF1	19	4903080	4962154	protein_coding
ENSG00000276073	5.02996	0.561329	18.0268	2.17818e-05	0.0107524	NA		20	33985617	33988989	lincRNA
ENSG00000276855	-3.50369	3.46723	13.3789	0.000254473	0.0376853	NA		17	15789016	15789705	lincRNA
ENSG00000278389	5.06449	0.545934	15.3623	8.87412e-05	0.0231915	NA		16	19111035	19111484	lincRNA
ENSG00000278518	-7.70976	2.75107	14.2698	0.000158383	0.0282915	NA		10	133526259	133527513	antisense_RNA
ENSG00000279333	3.99678	0.188779	13.6999	0.000214465	0.0336145	NA		1	210678315	210681932	TEC
ENSG00000280200	4.53596	0.35334	14.3257	0.000153752	0.0281107	NA		12	130976786	130978812	TEC
ENSG00000280248	-5.26915	1.10125	12.6205	0.000381537	0.0480872	NA		17	80339898	80342058	TEC
Supplementary Table 9b. Differentially expressed genes (Control Group Male vs Female) obtained using EdgeR glmLRT normalization with RUV
ensembl_gene_id	logFC	logCPM	LR	PValue	FDR	entrezgene	hgnc_symbol	chromosome_name	start_position	end_position	gene_biotype
ENSG00000012124	-5.58842	0.881597	15.7186	7.34995e-05	0.0152455	933	CD22	19	35319261	35347355	protein_coding
ENSG00000012817	7.40248	2.36937	45.216	1.76456e-11	6.27161e-08	8284	KDM5D	Y	19703865	19744939	protein_coding
ENSG00000013293	5.54179	0.450249	20.5526	5.80164e-06	0.0032219	57709	SLC7A14	3	170459584	170586074	protein_coding
ENSG00000067048	6.34086	4.03725	87.4334	8.7166e-21	7.21534e-17	8653	DDX3Y	Y	12904108	12920478	protein_coding
ENSG00000067646	5.30069	1.01592	16.3605	5.23653e-05	0.0126021	7544	ZFY	Y	2935281	2982506	protein_coding
ENSG00000071909	4.75235	0.549281	16.5861	4.64905e-05	0.0119737	140469	MYO3B	2	170178145	170655171	protein_coding
ENSG00000080947	4.97433	0.385976	14.5857	0.000133929	0.0224533	114819	CROCCP3	1	16467436	16499257	transcribed_unprocessed_pseudogene
ENSG00000089558	5.31053	0.647019	14.0826	0.000174952	0.0259713	23415	KCNH4	17	42156891	42181278	protein_coding
ENSG00000099725	6.24309	3.3042	42.0537	8.8799e-11	2.63008e-07	5616	PRKY	Y	7273972	7381548	transcribed_unprocessed_pseudogene
ENSG00000100147	-5.75442	1.28329	12.4538	0.000417133	0.0430981	79879	CCDC134	22	41800679	41826299	protein_coding
ENSG00000101052	2.89976	2.95021	13.5554	0.000231626	0.0298278	51098	IFT52	20	43590931	43647296	protein_coding
ENSG00000102109	4.26012	0.408789	12.8959	0.000329305	0.0368055	27344	PCSK1N	X	48831094	48835633	protein_coding
ENSG00000102313	5.57188	0.610267	17.5654	2.77589e-05	0.00865445	347365	ITIH6	X	54748899	54798240	protein_coding
ENSG00000105352	3.7612	2.07656	13.2363	0.000274586	0.03314	1089	CEACAM4	19	41618971	41627074	protein_coding
ENSG00000105609	4.28894	0.777518	12.9891	0.000313317	0.0352402	10990	LILRB5	19	54249431	54257301	protein_coding
ENSG00000107815	-5.33998	2.24819	23.2936	1.39064e-06	0.00120471	56652	TWNK	10	100987367	100994401	protein_coding
ENSG00000109674	-6.10566	2.06975	12.309	0.00045078	0.0450045	55247	NEIL3	4	177309836	177362943	protein_coding
ENSG00000109956	-6.61687	1.19973	14.1663	0.000167342	0.0258859	27087	B3GAT1	11	134378504	134411918	protein_coding
ENSG00000113555	5.81124	0.751083	20.2399	6.83133e-06	0.00361092	51294	PCDH12	5	141943585	141969741	protein_coding
ENSG00000113594	-2.23116	5.21243	12.228	0.000470784	0.0463614	3977	LIFR	5	38474963	38608354	protein_coding
ENSG00000114374	6.78954	2.45784	40.9253	1.58162e-10	4.01528e-07	8287	USP9Y	Y	12701231	12860839	protein_coding
ENSG00000121653	2.69994	3.30341	12.5087	0.000405052	0.0423422	9479	MAPK8IP1	11	45885651	45906465	protein_coding
ENSG00000125046	6.95304	1.63472	27.1496	1.88305e-07	0.000257412	51066	SSUH2	3	8619400	8745040	protein_coding
ENSG00000129824	5.78298	5.2707	101.1	8.74645e-24	1.55433e-19	6192	RPS4Y1	Y	2841486	2932000	protein_coding
ENSG00000131002	4.91804	3.52473	39.3214	3.5948e-10	7.9854e-07	246126	TXLNGY	Y	19567313	19606274	transcribed_unprocessed_pseudogene
ENSG00000132164	-7.31397	2.49439	22.3409	2.28293e-06	0.00150259	6538	SLC6A11	3	10816200	10940733	protein_coding
ENSG00000134962	-6.24215	1.2251	12.1212	0.000498511	0.0476292	152831	KLB	4	39406853	39451536	protein_coding
ENSG00000135314	-5.52431	1.21266	15.6537	7.60623e-05	0.0152455	80759	KHDC1	6	73241314	73310365	protein_coding
ENSG00000136928	-7.01622	1.92983	17.1691	3.41961e-05	0.00934922	9568	GABBR2	9	98288082	98709197	protein_coding
ENSG00000137766	6.21669	1.22193	17.8708	2.3642e-05	0.00807967	440279	UNC13C	15	54012904	54633414	protein_coding
ENSG00000144712	-6.02826	2.95761	12.8418	0.000338953	0.0376471	23066	CAND2	3	12796472	12871916	protein_coding
ENSG00000147160	-6.4443	0.953851	15.8895	6.71502e-05	0.0142063	158835	AWAT2	X	70040542	70049938	protein_coding
ENSG00000148584	-6.78784	3.23702	12.9997	0.000311543	0.0352402	29974	A1CF	10	50799409	50885675	protein_coding
ENSG00000149654	5.25754	0.36302	17.7266	2.55036e-05	0.00816383	64405	CDH22	20	46173733	46308498	protein_coding
ENSG00000150394	-6.32147	1.68616	19.5462	9.81962e-06	0.00459222	1006	CDH8	16	61647242	62037035	protein_coding
ENSG00000153404	5.55875	0.985251	15.0367	0.00010544	0.0185523	153478	PLEKHG4B	5	92151	189972	protein_coding
ENSG00000153902	4.75606	1.33337	15.0475	0.000104838	0.0185523	163175	LGI4	19	35124513	35142451	protein_coding
ENSG00000154118	5.00467	1.40487	12.7195	0.000361867	0.0394524	57338	JPH3	16	87601835	87698156	protein_coding
ENSG00000154620	4.83093	1.06065	22.478	2.12559e-06	0.00145284	9087	TMSB4Y	Y	13703567	13706024	protein_coding
ENSG00000156113	-5.1865	2.67156	13.2316	0.000275266	0.03314	3778	KCNMA1	10	76869601	77638369	protein_coding
ENSG00000161634	5.50512	0.792276	13.99	0.000183786	0.0259713	117159	DCD	12	54644591	54648493	protein_coding
ENSG00000163661	3.69243	1.74874	12.6069	0.000384328	0.0408277	5806	PTX3	3	157436789	157443628	protein_coding
ENSG00000163746	6.07918	1.13772	23.1816	1.47402e-06	0.00120471	57047	PLSCR2	3	146391421	146495991	protein_coding
ENSG00000164404	5.73573	0.641209	17.367	3.08126e-05	0.00902894	2661	GDF9	5	132861181	132866884	protein_coding
ENSG00000164509	5.40843	1.55862	13.496	0.000239073	0.0300074	133396	IL31RA	5	55851379	55922853	protein_coding
ENSG00000165246	4.62111	1.11521	18.346	1.84206e-05	0.00681811	22829	NLGN4Y	Y	14522638	14845650	protein_coding
ENSG00000165633	-5.20029	2.25386	13.8825	0.000194601	0.0264625	196740	VSTM4	10	49014245	49115509	protein_coding
ENSG00000166006	5.22538	0.357018	17.7844	2.47408e-05	0.00816383	3747	KCNC2	12	75040077	75209868	protein_coding
ENSG00000170579	5.38151	0.545632	15.5549	8.0142e-05	0.0154805	9229	DLGAP1	18	3496032	4455335	protein_coding
ENSG00000170893	-6.14892	1.24644	14.0916	0.000174117	0.0259713	7200	TRH	3	129974305	129977938	protein_coding
ENSG00000172167	-4.63959	2.74062	12.671	0.000371373	0.039998	27085	MTBP	8	120445400	120542133	protein_coding
ENSG00000176728	4.59018	0.745481	12.6877	0.00036806	0.0398829	NA	TTTY14	Y	18872501	19077416	lincRNA
ENSG00000177875	5.26948	0.808654	14.0471	0.000178289	0.0259713	387856	CCDC184	12	48183584	48185926	protein_coding
ENSG00000178093	-6.94748	2.00619	15.1996	9.67214e-05	0.0175391	83983	TSSK6	19	19512418	19515685	protein_coding
ENSG00000178385	5.74172	0.633025	23.1591	1.49139e-06	0.00120471	389072	PLEKHM3	2	207821288	208025560	protein_coding
ENSG00000179066	-6.06819	1.49921	12.1357	0.000494648	0.0475156	NA		19	35105969	35107318	lincRNA
ENSG00000179520	-3.4339	1.40617	17.2993	3.19298e-05	0.00906712	246213	SLC17A8	12	100357079	100422059	protein_coding
ENSG00000182685	-6.16547	1.56131	14.2185	0.000162763	0.0258255	283870	BRICD5	16	2209253	2211950	protein_coding
ENSG00000182965	4.48681	0.429643	14.4442	0.000144372	0.023337	NA	NPM1P14	7	112520488	112521670	processed_pseudogene
ENSG00000183454	5.36317	0.687616	13.4743	0.000241852	0.0300556	2903	GRIN2A	16	9753404	10182754	protein_coding
ENSG00000183813	-7.12518	2.49314	15.6025	7.81513e-05	0.015347	1233	CCR4	3	32951574	32956349	protein_coding
ENSG00000186487	-6.9877	1.3932	18.1574	2.03378e-05	0.00722847	23040	MYT1L	2	1789113	2331260	protein_coding
ENSG00000187021	-7.40008	1.87531	14.9991	0.000107561	0.0187399	5407	PNLIPRP1	10	116590385	116609175	protein_coding
ENSG00000187123	-6.04059	1.66564	13.9111	0.000191668	0.0264041	130574	LYPD6	2	149329985	149474148	protein_coding
ENSG00000187186	-4.88055	0.851711	12.6256	0.000380507	0.0407349	730098		9	34664163	34666112	protein_coding
ENSG00000188295	-4.72902	2.01807	15.9004	6.67655e-05	0.0142063	79862	ZNF669	1	247099962	247104372	protein_coding
ENSG00000188501	-6.97127	1.91574	15.9546	6.48783e-05	0.0142063	197021	LCTL	15	66547179	66565979	protein_coding
ENSG00000189045	4.35952	1.75868	20.118	7.28064e-06	0.00369669	728780	ANKDD1B	5	75611459	75671846	protein_coding
ENSG00000197415	-6.65567	1.97531	14.8125	0.000118747	0.0204879	79674	VEPH1	3	157259742	157533619	protein_coding
ENSG00000197587	-6.06064	1.47266	13.9275	0.00019	0.0263788	127343	DMBX1	1	46506996	46514226	protein_coding
ENSG00000197847	5.66496	0.872766	16.2934	5.42536e-05	0.0126021	NA	SLC22A20P	11	65213840	65242757	transcribed_unitary_pseudogene
ENSG00000197959	4.50695	1.33535	12.2367	0.000468578	0.0463614	26052	DNM3	1	171841498	172418466	protein_coding
ENSG00000198626	-5.99061	1.4231	12.7549	0.000355087	0.0391433	6262	RYR2	1	237042205	237833988	protein_coding
ENSG00000198692	6.038	3.23923	59.0615	1.52816e-14	6.78925e-11	9086	EIF1AY	Y	20575725	20593154	protein_coding
ENSG00000199347	6.59545	1.20546	33.5716	6.8688e-09	1.22066e-05	26829	RNU5E-1	1	11908152	11908271	snRNA
ENSG00000199530	-6.33543	1.67235	13.2032	0.000279468	0.03314	NA		4	82944738	82944845	misc_RNA
ENSG00000205277	5.49921	1.08039	12.1561	0.000489281	0.0474051	10071	MUC12	7	100969623	101018949	protein_coding
ENSG00000207105	-6.10967	1.28869	17.2078	3.35051e-05	0.00930343	NA		15	48995912	48996022	misc_RNA
ENSG00000207177	4.88631	0.401342	13.7156	0.000212684	0.0277912	NA		5	110684794	110684927	snoRNA
ENSG00000207313	6.61579	1.02935	25.9412	3.51982e-07	0.000417005	677794	SNORA2B	12	48667457	48667593	snoRNA
ENSG00000211454	-5.08491	0.610341	13.1252	0.00029135	0.0339322	246181	AKR7L	1	19265982	19274194	polymorphic_pseudogene
ENSG00000212306	-6.99572	1.37352	15.66	7.58114e-05	0.0152455	NA		15	100638363	100638457	misc_RNA
ENSG00000213203	-6.95266	1.88103	18.3072	1.87996e-05	0.00681811	170575	GIMAP1	7	150716557	150724284	protein_coding
ENSG00000213272	5.29323	0.794692	14.7468	0.000122958	0.0210105	NA	RPL7AP9	12	76599671	76600470	processed_pseudogene
ENSG00000213358	-7.4014	2.39264	12.3779	0.000434445	0.0441173	NA		3	196527339	196528791	unprocessed_pseudogene
ENSG00000214465	4.91746	0.567881	13.9864	0.000184142	0.0259713	NA	SMARCE1P6	2	26149204	26150731	processed_pseudogene
ENSG00000214491	-7.2157	1.39961	17.7101	2.57259e-05	0.00816383	730005	SEC14L6	22	30522799	30546682	protein_coding
ENSG00000215009	5.55043	0.636857	15.1509	9.92487e-05	0.0178156	341392	ACSM4	12	7304284	7328724	protein_coding
ENSG00000220472	4.30104	0.894114	16.9048	3.9303e-05	0.0105826	NA		6	7338839	7339568	processed_pseudogene
ENSG00000221883	4.27872	0.887847	12.5989	0.000385969	0.0408277	646450	ARIH2OS	3	48917788	48919385	protein_coding
ENSG00000223343	4.37143	0.130543	14.4261	0.000145766	0.023337	NA		3	48985049	48989988	antisense_RNA
ENSG00000224186	4.97247	1.61492	14.0522	0.000177805	0.0259713	NA	C5orf66	5	135033280	135358219	antisense_RNA
ENSG00000224697	-5.94194	1.00139	25.2392	5.06416e-07	0.000529383	NA	NEFMP1	10	54599678	54600683	processed_pseudogene
ENSG00000225901	-6.98109	1.48982	17.356	3.09924e-05	0.00902894	NA	MTND2P9	9	80565032	80565962	unprocessed_pseudogene
ENSG00000226149	5.18687	0.759783	16.0219	6.26136e-05	0.0139088	NA		6	129526626	129552587	lincRNA
ENSG00000227053	4.54413	2.46863	19.0472	1.27528e-05	0.00527045	102724094		7	101014320	101017608	antisense_RNA
ENSG00000228486	3.07662	2.53577	16.4865	4.89975e-05	0.0122639	728537	C2orf92	2	97664217	97703064	protein_coding
ENSG00000229688	-4.1064	2.18732	26.0188	3.38117e-07	0.000417005	100506025	ISPD-AS1	7	16210488	16270604	antisense_RNA
ENSG00000229807	-5.69114	8.19086	86.7716	1.21805e-20	7.21534e-17	7503	XIST	X	73820651	73852753	lincRNA
ENSG00000229992	-5.13072	0.627923	14.1896	0.000165285	0.0258859	NA	HMGB3P9	1	92647048	92647630	processed_pseudogene
ENSG00000230148	-6.28122	2.50788	28.8396	7.86271e-08	0.00011644	100874362	HOXB-AS1	17	48543551	48551250	antisense_RNA
ENSG00000231890	-6.49195	1.85425	15.9142	6.62794e-05	0.0142063	NA	DARS-AS1	2	135985176	136022593	antisense_RNA
ENSG00000233330	-5.96546	1.42715	13.3197	0.000262639	0.0324122	NA		6	149591755	149592663	antisense_RNA
ENSG00000233864	5.87057	1.47885	22.7764	1.81989e-06	0.00134755	64595	TTTY15	Y	12662334	12692233	lincRNA
ENSG00000234022	5.23575	0.958417	13.878	0.00019507	0.0264625	NA		2	15564170	15573868	antisense_RNA
ENSG00000234222	4.74948	1.13533	17.5159	2.8492e-05	0.00872986	105371260	LIX1L-AS1	1	145926590	145959179	antisense_RNA
ENSG00000234277	-7.15655	1.95154	21.1729	4.19654e-06	0.0024057	NA	LINC01641	1	227393591	227431035	lincRNA
ENSG00000234284	-5.98031	1.50387	13.1815	0.000282721	0.0332731	345462	ZNF879	5	179023752	179035064	protein_coding
ENSG00000234602	4.2524	0.558389	12.4707	0.000413386	0.0429608	345643	MCIDAS	5	55219614	55227315	protein_coding
ENSG00000235172	4.37275	0.794199	13.8576	0.000197194	0.026548	NA	LINC01366	5	170331429	170333879	lincRNA
ENSG00000237166	-6.31049	1.63781	15.2429	9.45337e-05	0.0173192	100507140	LINC01792	2	200712305	200735177	lincRNA
ENSG00000237489	-6.50728	1.07718	15.2925	9.20793e-05	0.0170452	387723	C10orf143	10	130063900	130110817	protein_coding
ENSG00000237734	-7.54745	2.42652	18.5332	1.66968e-05	0.0064318	NA		9	27391734	27397563	antisense_RNA
ENSG00000237772	5.65279	1.00766	13.2214	0.000276765	0.03314	NA		2	138604510	138613167	lincRNA
ENSG00000237781	6.12181	1.38772	13.7963	0.000203734	0.0271361	NA		1	150548562	150557724	antisense_RNA
ENSG00000237806	-4.89021	0.516681	13.1136	0.000293153	0.0339322	NA	FAUP2	3	181242345	181242901	processed_pseudogene
ENSG00000239115	6.6058	0.914034	25.4483	4.54393e-07	0.000504689	NA	RNU7-67P	8	101307367	101307428	snRNA
ENSG00000239168	5.39797	0.826087	14.0903	0.000174243	0.0259713	NA	RNU7-197P	4	148991572	148991633	snRNA
ENSG00000239388	5.02391	0.697943	15.498	8.25914e-05	0.0157821	142686	ASB14	3	57268347	57292682	protein_coding
ENSG00000239627	5.5659	0.641557	14.6778	0.000127543	0.0215863	NA	RPL12P20	4	41389115	41389593	processed_pseudogene
ENSG00000240204	3.32105	2.03383	13.2991	0.000265527	0.0325426	100287482	SMKR1	7	129502479	129512932	protein_coding
ENSG00000240674	-8.02853	2.59065	20.2184	6.90852e-06	0.00361092	NA		4	165012366	165012845	processed_pseudogene
ENSG00000241684	-6.10153	1.1696	17.2866	3.21438e-05	0.00906712	NA	ADAMTS9-AS2	3	64684909	65011468	antisense_RNA
ENSG00000243541	-6.69383	1.53089	29.0992	6.87657e-08	0.000111094	NA	RN7SL104P	2	15950689	15950981	misc_RNA
ENSG00000243566	5.35853	1.34564	15.592	7.85875e-05	0.015347	105375355	UPK3B	7	76510428	76516521	protein_coding
ENSG00000244053	-8.14242	2.53886	18.4977	1.70106e-05	0.0064318	NA	RPL13AP2	14	47200575	47201104	processed_pseudogene
ENSG00000248474	-5.00246	0.859225	13.7882	0.000204617	0.0271361	NA	LINC02122	5	74084068	74103216	lincRNA
ENSG00000249631	6.64388	1.26174	34.2429	4.86441e-09	9.60506e-06	NA		4	11625714	11813958	lincRNA
ENSG00000249655	-7.17266	1.9622	13.9555	0.000187192	0.0261935	NA		5	80630313	80631590	antisense_RNA
ENSG00000250073	-6.26316	1.11847	12.1782	0.000483507	0.047211	101929340		11	124759129	124765936	antisense_RNA
ENSG00000250075	-5.24974	0.951891	15.3545	8.91078e-05	0.0166688	101927237		4	67417305	67468251	lincRNA
ENSG00000251669	5.48413	1.66141	14.1644	0.000167513	0.0258859	348926	FAM86EP	4	3941760	3955419	transcribed_unprocessed_pseudogene
ENSG00000252027	-5.8533	1.17466	15.4554	8.44767e-05	0.0159706	NA	RNU6ATAC14P	2	176664676	176664766	snRNA
ENSG00000253223	4.86733	1.29255	14.5569	0.000135988	0.022514	NA		8	66984135	66986187	processed_pseudogene
ENSG00000253878	5.2816	1.27561	19.1633	1.20001e-05	0.00516641	NA		8	94950037	94951396	sense_intronic
ENSG00000254420	-6.58779	1.18611	16.4523	4.98893e-05	0.0123137	NA		11	78324758	78444049	antisense_RNA
ENSG00000254473	5.20353	0.596977	14.0188	0.000180996	0.0259713	NA		9	83707594	83713378	antisense_RNA
ENSG00000254815	5.71937	0.614255	19.7832	8.67416e-06	0.0042819	692247		11	557595	560107	antisense_RNA
ENSG00000256377	5.83766	1.33106	16.246	5.56267e-05	0.0126736	NA		12	27696388	27710770	antisense_RNA
ENSG00000256973	5.53839	0.575326	16.7332	4.30225e-05	0.0112434	NA		12	22460519	22463914	lincRNA
ENSG00000257605	4.57357	0.352082	12.423	0.000424078	0.043312	NA		12	53298655	53300314	antisense_RNA
ENSG00000257954	-6.005	0.967542	16.8362	4.07495e-05	0.0108084	NA		12	49389516	49390162	processed_pseudogene
ENSG00000258044	-6.53566	1.16261	13.9904	0.000183746	0.0259713	NA		12	79823778	79825496	antisense_RNA
ENSG00000259120	-7.69923	2.8057	19.1301	1.22103e-05	0.00516641	100130933	SMIM6	17	75646243	75647977	protein_coding
ENSG00000259462	-6.67896	1.57999	16.4874	4.89743e-05	0.0122639	283692	CPEB1-AS1	15	82647770	82692820	antisense_RNA
ENSG00000259684	5.1702	0.462905	17.7631	2.50191e-05	0.00816383	NA		15	50557601	50560500	antisense_RNA
ENSG00000259702	5.33552	1.16332	17.3773	3.06465e-05	0.00902894	NA		15	96045341	96064357	lincRNA
ENSG00000260185	5.23576	1.02154	13.1079	0.00029405	0.0339322	NA		16	71655027	71664212	antisense_RNA
ENSG00000260351	-7.45469	1.91354	19.6323	9.38671e-06	0.00450841	NA		15	83022571	83090782	antisense_RNA
ENSG00000260805	-5.16355	0.914731	12.1108	0.000501296	0.0476392	NA		1	212557833	212559731	lincRNA
ENSG00000261359	4.26899	2.59485	16.2154	5.65314e-05	0.0127167	100652740	PYCARD-AS1	16	31201885	31203452	antisense_RNA
ENSG00000261465	5.86461	1.33509	24.1321	8.99485e-07	0.000888042	NA		16	19062499	19067691	antisense_RNA
ENSG00000261997	-5.60016	2.56333	13.0874	0.000297288	0.0340846	NA		16	55538200	55542027	lincRNA
ENSG00000264548	5.45692	1.31426	16.3373	5.30111e-05	0.0126021	NA		17	82214227	82217352	antisense_RNA
ENSG00000264743	6.4161	0.907465	19.2569	1.14254e-05	0.00507601	NA	DPRXP4	17	30975387	30975954	processed_pseudogene
ENSG00000264772	-5.41497	1.43878	12.3482	0.000441419	0.0443189	NA		17	7572826	7582024	processed_transcript
ENSG00000266368	5.21345	0.779102	16.2812	5.46035e-05	0.0126021	NA		17	11953889	11977594	antisense_RNA
ENSG00000266770	4.73456	0.528039	13.4981	0.000238811	0.0300074	NA	RN7SL619P	19	13815062	13815319	misc_RNA
ENSG00000267943	-5.86718	1.31853	13.4905	0.000239776	0.0300074	NA		19	53007512	53013180	lincRNA
ENSG00000269927	6.21982	0.864511	18.8462	1.4169e-05	0.0055955	NA		14	71141125	71143253	lincRNA
ENSG00000270117	4.93002	0.480213	13.2015	0.000279725	0.03314	NA		11	65498010	65498405	lincRNA
ENSG00000270328	-7.79358	2.35835	21.9332	2.82303e-06	0.00175936	NA		8	56776283	56776874	processed_pseudogene
ENSG00000270457	4.86412	0.636612	16.3268	5.33045e-05	0.0126021	NA		1	59289303	59289640	lincRNA
ENSG00000271917	-7.08813	2.21761	14.4344	0.000145125	0.023337	NA		1	164828436	164829952	sense_intronic
ENSG00000272195	-5.39407	0.969412	12.2224	0.000472197	0.0463614	NA		1	244969350	244971088	antisense_RNA
ENSG00000272717	-5.57047	0.927304	12.3558	0.000439611	0.0443189	NA		4	139556799	139557643	antisense_RNA
ENSG00000272906	3.25111	1.42217	12.1502	0.00049083	0.0474051	NA		1	179881607	179882595	lincRNA
ENSG00000272983	-6.18299	1.51788	13.5659	0.000230335	0.0298278	NA		10	38137337	38144399	lincRNA
ENSG00000273113	6.32442	0.83569	21.6957	3.19502e-06	0.00189262	NA		2	241581922	241582726	lincRNA
ENSG00000273829	-8.57261	2.87403	21.9009	2.87105e-06	0.00175936	NA		16	50054143	50054430	misc_RNA
ENSG00000273906	5.53725	0.762665	14.5454	0.000136825	0.022514	NA		Y	6918682	6920791	sense_intronic
ENSG00000273980	-4.53415	0.381498	12.4336	0.000421681	0.043312	NA		10	133257144	133257551	lincRNA
ENSG00000274660	4.08319	0.0805059	13.0117	0.000309555	0.0352402	NA		10	100666695	100667009	misc_RNA
ENSG00000275355	-6.46153	1.39454	15.6465	7.6352e-05	0.0152455	NA		18	76840838	76841102	misc_RNA
ENSG00000276043	5.31711	0.722582	18.0727	2.12628e-05	0.00740905	29128	UHRF1	19	4903080	4962154	protein_coding
ENSG00000276073	5.51575	0.563162	23.4451	1.2853e-06	0.00120216	NA		20	33985617	33988989	lincRNA
ENSG00000278518	-7.91542	2.73917	15.6566	7.59489e-05	0.0152455	NA		10	133526259	133527513	antisense_RNA
ENSG00000278952	-5.84505	1.0939	12.7457	0.000356829	0.0391433	NA		11	65118310	65119111	TEC
ENSG00000279204	-8.17803	2.54264	19.2672	1.13642e-05	0.00507601	NA		5	159106380	159108617	TEC
ENSG00000279333	4.2217	0.190867	12.5576	0.000394592	0.0414929	NA		1	210678315	210681932	TEC
ENSG00000279557	-5.28041	0.634463	13.7208	0.000212096	0.0277912	NA		5	43586367	43587543	TEC
ENSG00000279565	-7.01153	1.97302	13.5037	0.000238093	0.0300074	NA		6	88172261	88175762	TEC
ENSG00000280200	4.85207	0.354073	14.1164	0.000171842	0.0259713	NA		12	130976786	130978812	TEC
Supplementary Table 9c. Differentially expressed genes (Control Group Male vs Female) obtained using EdgeR glmQLF normalization with RUV
ensembl_gene_id	logFC	logCPM	F	PValue	FDR	entrezgene	hgnc_symbol	chromosome_name	start_position	end_position	gene_biotype
ENSG00000012817	7.43405	2.36937	38.6692	3.62332e-07	0.0012878	8284	KDM5D	Y	19703865	19744939	protein_coding
ENSG00000067048	6.22167	4.03725	62.7253	2.19585e-09	1.30075e-05	8653	DDX3Y	Y	12904108	12920478	protein_coding
ENSG00000067646	5.28375	1.01592	19.2477	9.67465e-05	0.0463919	7544	ZFY	Y	2935281	2982506	protein_coding
ENSG00000071909	4.70885	0.549281	18.8044	0.000112561	0.0487885	140469	MYO3B	2	170178145	170655171	protein_coding
ENSG00000099725	6.25847	3.3042	37.5652	4.76464e-07	0.00141121	5616	PRKY	Y	7273972	7381548	transcribed_unprocessed_pseudogene
ENSG00000113555	5.83425	0.751083	25.9361	1.14483e-05	0.0184952	51294	PCDH12	5	141943585	141969741	protein_coding
ENSG00000114374	6.81134	2.45784	34.543	1.0313e-06	0.00261819	8287	USP9Y	Y	12701231	12860839	protein_coding
ENSG00000125046	7.1996	1.63472	29.0064	7.97774e-06	0.0141798	51066	SSUH2	3	8619400	8745040	protein_coding
ENSG00000129824	5.76824	5.2707	99.7051	6.82014e-12	6.06003e-08	6192	RPS4Y1	Y	2841486	2932000	protein_coding
ENSG00000131002	4.90451	3.52473	29.6285	3.91249e-06	0.0086911	246126	TXLNGY	Y	19567313	19606274	transcribed_unprocessed_pseudogene
ENSG00000132164	-7.67485	2.49439	23.4442	3.18346e-05	0.0353582	6538	SLC6A11	3	10816200	10940733	protein_coding
ENSG00000137766	6.03416	1.22193	20.7086	5.92935e-05	0.0424687	440279	UNC13C	15	54012904	54633414	protein_coding
ENSG00000161634	5.53243	0.792276	20.1602	7.11374e-05	0.0424687	117159	DCD	12	54644591	54648493	protein_coding
ENSG00000163746	6.1325	1.13772	27.1521	7.97916e-06	0.0141798	57047	PLSCR2	3	146391421	146495991	protein_coding
ENSG00000177875	5.45063	0.808654	20.3563	6.66378e-05	0.0424687	387856	CCDC184	12	48183584	48185926	protein_coding
ENSG00000182965	4.58954	0.429643	18.5383	0.000123354	0.049821	NA	NPM1P14	7	112520488	112521670	processed_pseudogene
ENSG00000183454	5.39588	0.687616	19.149	0.000100051	0.0463919	2903	GRIN2A	16	9753404	10182754	protein_coding
ENSG00000198692	5.92312	3.23923	38.8004	3.50833e-07	0.0012878	9086	EIF1AY	Y	20575725	20593154	protein_coding
ENSG00000215009	5.53153	0.636857	21.1818	5.07504e-05	0.0409948	341392	ACSM4	12	7304284	7328724	protein_coding
ENSG00000226149	5.46613	0.759783	21.6119	4.6565e-05	0.0409948	NA		6	129526626	129552587	lincRNA
ENSG00000229807	-5.66777	8.19086	166.572	4.91244e-15	8.7299e-11	7503	XIST	X	73820651	73852753	lincRNA
ENSG00000230148	-6.27852	2.50788	20.1796	7.06789e-05	0.0424687	100874362	HOXB-AS1	17	48543551	48551250	antisense_RNA
ENSG00000233864	5.85252	1.47885	22.9108	2.90861e-05	0.0353582	64595	TTTY15	Y	12662334	12692233	lincRNA
ENSG00000234022	5.30865	0.958417	19.001	0.000105232	0.0467517	NA		2	15564170	15573868	antisense_RNA
ENSG00000237734	-8.92912	2.42652	21.4173	8.39511e-05	0.0438793	NA		9	27391734	27397563	antisense_RNA
ENSG00000237781	6.04162	1.38772	19.2465	9.67836e-05	0.0463919	NA		1	150548562	150557724	antisense_RNA
ENSG00000239388	5.10771	0.697943	20.2283	6.954e-05	0.0424687	142686	ASB14	3	57268347	57292682	protein_coding
ENSG00000244053	-8.95212	2.53886	21.0542	6.23197e-05	0.0424687	NA	RPL13AP2	14	47200575	47201104	processed_pseudogene
ENSG00000251669	5.83198	1.66141	19.8324	7.93937e-05	0.0438793	348926	FAM86EP	4	3941760	3955419	transcribed_unprocessed_pseudogene
ENSG00000253878	5.38678	1.27561	20.1369	7.16932e-05	0.0424687	NA		8	94950037	94951396	sense_intronic
ENSG00000254473	5.13117	0.596977	19.6832	8.3482e-05	0.0438793	NA		9	83707594	83713378	antisense_RNA
ENSG00000256377	5.90977	1.33106	20.6645	6.01632e-05	0.0424687	NA		12	27696388	27710770	antisense_RNA
ENSG00000259684	5.30004	0.462905	23.7701	2.88901e-05	0.0353582	NA		15	50557601	50560500	antisense_RNA
ENSG00000259702	5.55774	1.16332	19.5349	9.19865e-05	0.0463919	NA		15	96045341	96064357	lincRNA
ENSG00000261465	5.87046	1.33509	24.463	1.79132e-05	0.0265279	NA		16	19062499	19067691	antisense_RNA
ENSG00000264548	5.49384	1.31426	18.6643	0.000118114	0.049821	NA		17	82214227	82217352	antisense_RNA
ENSG00000266368	5.49279	0.779102	21.8375	4.3318e-05	0.0409948	NA		17	11953889	11977594	antisense_RNA
ENSG00000270328	-8.60884	2.35835	22.6733	4.98559e-05	0.0409948	NA		8	56776283	56776874	processed_pseudogene
ENSG00000270457	4.91613	0.636612	19.7914	8.04963e-05	0.0438793	NA		1	59289303	59289640	lincRNA
ENSG00000273829	-10.1499	2.87403	24.0356	4.41962e-05	0.0409948	NA		16	50054143	50054430	misc_RNA
ENSG00000276043	5.26546	0.722582	21.7129	4.26912e-05	0.0409948	29128	UHRF1	19	4903080	4962154	protein_coding
ENSG00000279204	-9.22235	2.54264	19.7305	0.000120555	0.049821	NA		5	159106380	159108617	TEC
Supplementary Table 8d. Differentially expressed genes (Control Group Male vs Female) obtained using DESeq Wald normalization with RUV
ensembl_gene_id	baseMean	log2FoldChange	lfcSE	stat	pvalue	padj	entrezgene	hgnc_symbol	chromosome_name	start_position	end_position	gene_biotype
ENSG00000012817	7.19142	6.29417	1.41571	4.44593	8.75121e-06	0.0104621	8284	KDM5D	Y	19703865	19744939	protein_coding
ENSG00000067048	25.1338	6.48641	0.704036	9.21318	3.16613e-20	1.32479e-16	8653	DDX3Y	Y	12904108	12920478	protein_coding
ENSG00000099725	14.5528	6.49706	1.09417	5.93788	2.88727e-09	4.83242e-06	5616	PRKY	Y	7273972	7381548	transcribed_unprocessed_pseudogene
ENSG00000107815	6.09587	-5.4053	1.24807	-4.33092	1.48488e-05	0.0165683	56652	TWNK	10	100987367	100994401	protein_coding
ENSG00000113594	58.0334	-2.1827	0.525297	-4.15517	3.25045e-05	0.028484	3977	LIFR	5	38474963	38608354	protein_coding
ENSG00000114374	7.08204	6.16295	1.44728	4.2583	2.05983e-05	0.0207623	8287	USP9Y	Y	12701231	12860839	protein_coding
ENSG00000129824	60.6357	5.93539	0.501328	11.8393	2.44367e-32	2.04498e-28	6192	RPS4Y1	Y	2841486	2932000	protein_coding
ENSG00000131002	16.5913	4.97146	0.842042	5.90405	3.54681e-09	5.39663e-06	246126	TXLNGY	Y	19567313	19606274	transcribed_unprocessed_pseudogene
ENSG00000144712	14.48	-5.94825	1.45109	-4.09917	4.14633e-05	0.0330463	23066	CAND2	3	12796472	12871916	protein_coding
ENSG00000189403	340.149	-0.868659	0.195289	-4.44807	8.66469e-06	0.0104621	3146	HMGB1	13	30456704	30617597	protein_coding
ENSG00000198034	1078.84	-0.983287	0.242474	-4.05523	5.00844e-05	0.0381029	6191	RPS4X	X	72255679	72277300	protein_coding
ENSG00000198692	13.3962	6.05541	0.904549	6.69439	2.16568e-11	4.02745e-08	9086	EIF1AY	Y	20575725	20593154	protein_coding
ENSG00000199347	2.39833	22.6748	2.75955	8.21684	2.08943e-16	5.82846e-13	26829	RNU5E-1	1	11908152	11908271	snRNA
ENSG00000224697	2.56731	-23.3622	2.97564	-7.85114	4.12267e-15	9.85732e-12	NA	NEFMP1	10	54599678	54600683	processed_pseudogene
ENSG00000229807	449.402	-5.71695	0.329654	-17.3423	2.25629e-67	3.77635e-63	7503	XIST	X	73820651	73852753	lincRNA
ENSG00000230148	8.00033	-6.16799	1.2563	-4.90964	9.12456e-07	0.00127265	100874362	HOXB-AS1	17	48543551	48551250	antisense_RNA
ENSG00000232118	4.04112	-22.8853	2.41876	-9.46156	3.0337e-21	1.6925e-17	NA	BACH1-AS1	21	29370019	29376339	lincRNA
ENSG00000240674	11.7838	-6.76288	1.63172	-4.14462	3.40372e-05	0.028484	NA		4	165012366	165012845	processed_pseudogene
ENSG00000243541	4.49205	-23.9055	3.34061	-7.15603	8.30496e-13	1.7375e-09	NA	RN7SL104P	2	15950689	15950981	misc_RNA
ENSG00000259120	11.0441	-6.9669	1.64238	-4.24195	2.21583e-05	0.0207623	100130933	SMIM6	17	75646243	75647977	protein_coding
ENSG00000276855	16.521	-3.97433	0.937291	-4.24023	2.23291e-05	0.0207623	NA		17	15789016	15789705	lincRNA
