# Supplementary material for: Inflammatory pathways are upregulated in the nasal epithelium in patients with idiopathic pulmonary fibrosis
Source: Respir Res. 2018 Nov 26;19:233. doi: 10.1186/s12931-018-0932-7 (PMC6257973; doi:10.1186/s12931-018-0932-7)
Supplement: Supplementary file 8 — Table S10. Differentially expressed genes obtained using DESeq Wald with RUV (IPF smokers vs CTRL smokers). (XLS 106 kb) [file 12931_2018_932_MOESM8_ESM.xls]

## Sheet: Additional Table S10
Supplementary Table 10. Differentially expressed genes obtained using DESeq Wald with RUV (IPF smokers vs CTRL smokers)
ensembl_gene_id	baseMean	log2FoldChange	lfcSE	stat	pvalue	padj	entrezgene	hgnc_symbol	chromosome_name	start_position	end_position	gene_biotype
ENSG00000005893	364.232	1.22358	0.36771	3.32757	0.000876071	0.0493581	3920	LAMP2	X	120427827	120469365	protein_coding
ENSG00000006611	12.0649	-6.05214	1.55875	-3.88268	0.000103309	0.0201988	10083	USH1C	11	17493895	17544416	protein_coding
ENSG00000013810	210.334	2.56634	0.646709	3.9683	7.23876e-05	0.0152418	10460	TACC3	4	1721490	1745176	protein_coding
ENSG00000021355	790.871	1.95525	0.527017	3.71003	0.000207236	0.0246634	1992	SERPINB1	6	2832332	2842006	protein_coding
ENSG00000027697	171.662	2.18591	0.564576	3.87178	0.000108044	0.0203961	3459	IFNGR1	6	137197484	137219449	protein_coding
ENSG00000062282	259.462	3.06446	0.918484	3.33643	0.000848604	0.0488924	84649	DGAT2	11	75759512	75801535	protein_coding
ENSG00000064932	331.97	2.17292	0.576262	3.77071	0.000162786	0.0234519	22904	SBNO2	19	1107636	1174283	protein_coding
ENSG00000068831	67.3532	3.11518	0.895616	3.47825	0.000504696	0.0414817	10235	RASGRP2	11	64726911	64745456	protein_coding
ENSG00000069399	1142.69	2.0267	0.572006	3.54315	0.00039538	0.0376436	602	BCL3	19	44747705	44760044	protein_coding
ENSG00000072110	628.549	1.87474	0.555284	3.37618	0.000734995	0.0460525	87	ACTN1	14	68874143	68979440	protein_coding
ENSG00000072401	176.756	2.32167	0.465696	4.98537	6.18433e-07	0.0024399	7321	UBE2D1	10	58334975	58370753	protein_coding
ENSG00000074660	71.9561	4.37849	1.16397	3.76169	0.000168768	0.0236903	8578	SCARF1	17	1633858	1645747	protein_coding
ENSG00000079974	106.987	-1.88849	0.551749	-3.42273	0.000619962	0.0448703	11158	RABL2B	22	50767501	50783663	protein_coding
ENSG00000079974	106.987	-1.88849	0.551749	-3.42273	0.000619962	0.0448703	11159	RABL2B	22	50767501	50783663	protein_coding
ENSG00000083067	11.7785	6.38101	1.5298	4.17115	3.03069e-05	0.0103697	80036	TRPM3	9	70529063	71446904	protein_coding
ENSG00000087157	59.7435	2.77348	0.821694	3.37531	0.000737313	0.0460525	9489	PGS1	17	78378640	78425114	protein_coding
ENSG00000087586	22.8148	3.40704	1.01798	3.34685	0.000817343	0.047841	6790	AURKA	20	56369389	56392337	protein_coding
ENSG00000089351	64.8368	3.26034	0.895275	3.64172	0.000270819	0.0290706	57655	GRAMD1A	19	34994784	35026471	protein_coding
ENSG00000091436	44.3971	2.68138	0.640164	4.18858	2.80707e-05	0.0103389	51776	MAP3K20	2	173075435	173268010	protein_coding
ENSG00000095794	280.673	2.3362	0.687994	3.39567	0.000684615	0.0451557	1390	CREM	10	35126791	35212958	protein_coding
ENSG00000099860	670.118	2.70434	0.619043	4.36857	1.25061e-05	0.0091983	4616	GADD45B	19	2476122	2478259	protein_coding
ENSG00000099985	703.364	3.38204	1.00416	3.36802	0.000757096	0.0460525	5008	OSM	22	30262829	30266840	protein_coding
ENSG00000100034	129.523	2.32738	0.659492	3.52905	0.000417058	0.037911	9647	PPM1F	22	21919420	21952837	protein_coding
ENSG00000100055	664.369	3.06585	0.893516	3.43122	0.000600875	0.0444526	27128	CYTH4	22	37282027	37315345	protein_coding
ENSG00000100906	3650.4	1.84314	0.533488	3.45489	0.000550511	0.043711	4792	NFKBIA	14	35401511	35404749	protein_coding
ENSG00000101336	301.146	3.22465	0.934968	3.44895	0.000562774	0.043711	3055	HCK	20	32052188	32101856	protein_coding
ENSG00000102096	311.488	3.07536	0.646145	4.75955	1.94026e-06	0.00424877	11040	PIM2	X	48913182	48919024	protein_coding
ENSG00000102524	456.496	3.07675	0.905956	3.39614	0.000683432	0.0451557	10673	TNFSF13B	13	108251240	108308484	protein_coding
ENSG00000103257	108.176	3.73281	0.819589	4.55449	5.25125e-06	0.007187	8140	SLC7A5	16	87830023	87869488	protein_coding
ENSG00000103381	175.784	2.51831	0.591992	4.25396	2.10026e-05	0.0091983	55313	CPPED1	16	12659799	12804017	protein_coding
ENSG00000103490	70.2731	1.42865	0.418636	3.41262	0.000643404	0.0448703	29108	PYCARD	16	31201485	31203450	protein_coding
ENSG00000103496	240.74	1.81256	0.484365	3.74214	0.000182461	0.0241323	6810	STX4	16	31032889	31042975	protein_coding
ENSG00000104419	540.524	1.55516	0.404291	3.84663	0.000119754	0.0205524	10397	NDRG1	8	133237171	133302022	protein_coding
ENSG00000104856	184.499	2.28407	0.611917	3.73265	0.000189478	0.0241323	5971	RELB	19	45001430	45038198	protein_coding
ENSG00000105835	4601.76	2.29149	0.616793	3.71517	0.000203065	0.0244325	10135	NAMPT	7	106248285	106286326	protein_coding
ENSG00000107201	102.975	2.55063	0.705696	3.61435	0.000301107	0.0313983	23586	DDX58	9	32455705	32526324	protein_coding
ENSG00000108179	423.754	2.44913	0.588368	4.16258	3.14671e-05	0.0104404	10105	PPIF	10	79347469	79355337	protein_coding
ENSG00000111729	53.298	3.34717	0.990531	3.37917	0.000727047	0.0460525	50856	CLEC4A	12	8123632	8138607	protein_coding
ENSG00000111732	10.2661	5.95366	1.7212	3.45901	0.000542167	0.0436485	57379	AICDA	12	8602166	8612871	protein_coding
ENSG00000112096	2364.54	2.5939	0.63334	4.09559	4.21099e-05	0.0121327	6648	SOD2	6	159669057	159745186	protein_coding
ENSG00000113368	548.178	3.30773	0.888187	3.72414	0.000195985	0.0241323	4001	LMNB1	5	126776623	126837020	protein_coding
ENSG00000114268	16.9368	4.76981	1.39682	3.41476	0.00063838	0.0448703	5210	PFKFB4	3	48517684	48562015	protein_coding
ENSG00000115828	109.293	2.73238	0.803722	3.39966	0.000674702	0.0451557	25797	QPCT	2	37342827	37373322	protein_coding
ENSG00000116473	158.005	1.47243	0.442619	3.32662	0.00087906	0.0493581	5906	RAP1A	1	111542218	111716691	protein_coding
ENSG00000116679	1635.85	2.06909	0.599487	3.45143	0.000557617	0.043711	10625	IVNS1ABP	1	185296388	185317329	protein_coding
ENSG00000117228	357.266	2.29679	0.567013	4.05068	5.10687e-05	0.012764	2633	GBP1	1	89052319	89065360	protein_coding
ENSG00000118503	404.384	2.09058	0.622426	3.35877	0.000782903	0.0463352	7128	TNFAIP3	6	137867188	137883312	protein_coding
ENSG00000118520	16.1144	6.3905	1.50077	4.25815	2.06122e-05	0.0091983	383	ARG1	6	131573144	131584332	protein_coding
ENSG00000119917	228.311	3.54089	0.767913	4.61105	4.00637e-06	0.00626654	3437	IFIT3	10	89327894	89340971	protein_coding
ENSG00000120063	95.558	2.26441	0.601642	3.76372	0.000167406	0.0236903	10672	GNA13	17	65010715	65056839	protein_coding
ENSG00000120217	52.2733	2.958	0.769485	3.84413	0.000120982	0.0205524	29126	CD274	9	5450503	5470566	protein_coding
ENSG00000121060	580.606	2.26802	0.553266	4.09934	4.14335e-05	0.0121327	7706	TRIM25	17	56836387	56914080	protein_coding
ENSG00000121933	16.068	6.96577	1.40148	4.97029	6.68528e-07	0.0024399	57413	TMIGD3	1	111483348	111563962	protein_coding
ENSG00000122417	146.831	-1.49546	0.426736	-3.50442	0.00045761	0.0388401	57489	ODF2L	1	86346824	86396342	protein_coding
ENSG00000123146	818.69	2.43683	0.665435	3.66201	0.000250245	0.027128	976	ADGRE5	19	14380501	14408725	protein_coding
ENSG00000123610	166.791	4.23928	1.04538	4.05524	5.00819e-05	0.012764	7130	TNFAIP6	2	151357592	151380048	protein_coding
ENSG00000123700	48.8962	3.78772	0.875546	4.32613	1.51753e-05	0.0091983	3759	KCNJ2	17	70168673	70180048	protein_coding
ENSG00000124126	298.107	2.30192	0.65547	3.51186	0.000444977	0.0382281	57580	PREX1	20	48624252	48827883	protein_coding
ENSG00000125780	11.8957	5.07472	1.49284	3.39937	0.000675408	0.0451557	7053	TGM3	20	2296001	2341078	protein_coding
ENSG00000126262	791.755	3.76753	1.04435	3.60755	0.000309097	0.0315351	2867	FFAR2	19	35443907	35451767	protein_coding
ENSG00000126561	137.538	2.4394	0.693691	3.51655	0.00043719	0.0382281	6776	STAT5A	17	42287547	42311943	protein_coding
ENSG00000126759	38.3261	3.77111	1.13208	3.33114	0.000864901	0.0492386	5199	CFP	X	47623172	47630305	protein_coding
ENSG00000127528	333.009	2.15916	0.631174	3.42087	0.000624218	0.0448703	10365	KLF2	19	16324817	16327874	protein_coding
ENSG00000128016	290.812	2.37027	0.671874	3.52784	0.000418963	0.037911	7538	ZFP36	19	39406813	39409412	protein_coding
ENSG00000128655	12.9361	6.46858	1.68014	3.85002	0.000118106	0.0205524	50940	PDE11A	2	177623252	178072755	protein_coding
ENSG00000130429	575.672	1.32599	0.393534	3.36945	0.000753181	0.0460525	10095	ARPC1B	7	99374249	99394816	protein_coding
ENSG00000131759	132.599	2.12906	0.631843	3.36961	0.000752747	0.0460525	5914	RARA	17	40309192	40357643	protein_coding
ENSG00000131873	205.121	2.38436	0.638785	3.73265	0.000189475	0.0241323	22856	CHSY1	15	101175723	101251932	protein_coding
ENSG00000132475	4737.97	1.89122	0.482997	3.9156	9.01788e-05	0.0182846	3021	H3F3B	17	75776434	75785893	protein_coding
ENSG00000133106	117.429	2.29432	0.673591	3.40611	0.000658954	0.0451557	94240	EPSTI1	13	42886388	42992271	protein_coding
ENSG00000133318	266.151	1.33159	0.352559	3.77692	0.000158779	0.0231955	10313	RTN3	11	63681446	63759891	protein_coding
ENSG00000134321	69.559	2.74325	0.80478	3.4087	0.000652732	0.0451557	91543	RSAD2	2	6865806	6898239	protein_coding
ENSG00000134686	319.176	1.76661	0.522472	3.38125	0.000721562	0.0460525	1912	PHC2	1	33323623	33431052	protein_coding
ENSG00000135604	69.8149	3.7046	0.869549	4.26037	2.04088e-05	0.0091983	8676	STX11	6	144150526	144188370	protein_coding
ENSG00000135821	1659.48	1.29027	0.382284	3.37515	0.000737753	0.0460525	2752	GLUL	1	182381704	182392206	protein_coding
ENSG00000137752	94.5933	2.80217	0.758117	3.69622	0.000218831	0.0248917	834	CASP1	11	105025443	105035250	protein_coding
ENSG00000138646	71.0356	3.72562	0.909633	4.09574	4.20828e-05	0.0121327	51191	HERC5	4	88457117	88506163	protein_coding
ENSG00000140379	1809.24	3.04947	0.888687	3.43144	0.000600387	0.0444526	597	BCL2A1	15	79960889	79971446	protein_coding
ENSG00000140564	420.816	2.14449	0.533218	4.02179	5.77581e-05	0.0135055	5045	FURIN	15	90868592	90883458	protein_coding
ENSG00000141480	617.878	1.83936	0.513842	3.57963	0.000344086	0.0342491	409	ARRB2	17	4710489	4721499	protein_coding
ENSG00000141574	380.403	2.288	0.530924	4.30947	1.63645e-05	0.0091983	6398	SECTM1	17	82321024	82334074	protein_coding
ENSG00000142089	303.428	1.92496	0.522194	3.68629	0.000227544	0.0251655	10410	IFITM3	11	319669	327537	protein_coding
ENSG00000142102	37.081	3.00545	0.889649	3.37824	0.000729513	0.0460525	80162	PGGHG	11	289135	296107	protein_coding
ENSG00000143119	274.993	2.5437	0.688573	3.69417	0.000220608	0.0248917	963	CD53	1	110871188	110899928	protein_coding
ENSG00000144118	294.438	1.77694	0.521871	3.40494	0.000661789	0.0451557	5899	RALB	2	120240064	120294713	protein_coding
ENSG00000144655	622.504	2.1712	0.616668	3.52085	0.000430162	0.0381061	64651	CSRNP1	3	39141855	39154562	protein_coding
ENSG00000146574	13.3991	6.46943	1.3529	4.78191	1.73634e-06	0.00424877	221960	CCZ1B	7	6794134	6826770	protein_coding
ENSG00000147408	50.3677	4.00122	0.953856	4.19478	2.73133e-05	0.0103389	55790	CSGALNACT1	8	19404161	19758029	protein_coding
ENSG00000147454	2585.35	2.51055	0.677281	3.70681	0.00020989	0.0247106	51312	SLC25A37	8	23528805	23575463	protein_coding
ENSG00000148926	601.044	2.43306	0.680668	3.57452	0.000350869	0.0346096	133	ADM	11	10304680	10307397	protein_coding
ENSG00000150977	565.093	2.27437	0.588863	3.8623	0.000112323	0.0204971	196383	RILPL2	12	123410683	123436717	protein_coding
ENSG00000151651	592.123	2.87338	0.833073	3.44913	0.000562399	0.043711	101	ADAM8	10	133262403	133276868	protein_coding
ENSG00000151726	383.554	2.24896	0.586491	3.83461	0.000125766	0.0205524	2180	ACSL1	4	184755595	184826818	protein_coding
ENSG00000153310	858.467	1.78912	0.532542	3.35958	0.000780603	0.0463352	51571	FAM49B	8	129839593	130017129	protein_coding
ENSG00000153395	152.001	2.77961	0.747763	3.71724	0.000201414	0.0244325	79888	LPCAT1	5	1456480	1523977	protein_coding
ENSG00000155657	19.3513	4.77303	1.08813	4.38646	1.1521e-05	0.0091983	7273	TTN	2	178525989	178830802	protein_coding
ENSG00000156127	117.022	2.62328	0.655281	4.0033	6.24657e-05	0.0136787	10538	BATF	14	75522425	75547015	protein_coding
ENSG00000157350	65.1061	3.29416	0.864724	3.80949	0.000139254	0.021756	6483	ST3GAL2	16	70375978	70439237	protein_coding
ENSG00000157557	731.841	1.40565	0.403907	3.48014	0.00050115	0.0414817	2114	ETS2	21	38805307	38824955	protein_coding
ENSG00000158869	135.871	3.01784	0.737935	4.08958	4.32163e-05	0.0121327	2207	FCER1G	1	161215234	161220699	protein_coding
ENSG00000159496	124.301	4.12604	1.1979	3.44439	0.000572359	0.0441321	266747	RGL4	22	23688136	23699176	protein_coding
ENSG00000159588	28.6796	-2.75985	0.789513	-3.49564	0.000472926	0.0398313	149483	CCDC17	1	45620044	45624057	protein_coding
ENSG00000159840	283.85	2.69207	0.628357	4.28429	1.83323e-05	0.0091983	7791	ZYX	7	143381080	143391111	protein_coding
ENSG00000160255	887.909	2.32717	0.653406	3.5616	0.000368607	0.0357158	3689	ITGB2	21	44885953	44931989	protein_coding
ENSG00000162645	409.992	2.0167	0.593001	3.40083	0.000671805	0.0451557	2634	GBP2	1	89106132	89150456	protein_coding
ENSG00000163297	68.9552	2.60904	0.761954	3.42414	0.000616749	0.0448703	118429	ANTXR2	4	79901149	80125454	protein_coding
ENSG00000163687	21.357	6.04221	1.39016	4.34642	1.38379e-05	0.0091983	1776	DNASE1L3	3	58192257	58214697	protein_coding
ENSG00000163931	275.897	1.60151	0.466146	3.43564	0.000591147	0.044399	7086	TKT	3	53224707	53256052	protein_coding
ENSG00000164327	163.338	1.86416	0.489475	3.8085	0.000139814	0.021756	253260	RICTOR	5	38937919	39074408	protein_coding
ENSG00000164970	26.9063	-2.54223	0.660227	-3.85054	0.000117856	0.0205524	203259	FAM219A	9	34398184	34458570	protein_coding
ENSG00000166165	96.2603	-1.90296	0.473266	-4.02091	5.79741e-05	0.0135055	1152	CKB	14	103519659	103523111	protein_coding
ENSG00000166710	24958.9	1.46368	0.384545	3.80627	0.000141079	0.021756	567	B2M	15	44711487	44718877	protein_coding
ENSG00000166923	17.1462	4.77151	1.37038	3.48188	0.000497901	0.0414817	26585	GREM1	15	32717974	32745107	protein_coding
ENSG00000167851	92.5101	3.63894	0.835745	4.35412	1.336e-05	0.0091983	11314	CD300A	17	74466399	74484796	protein_coding
ENSG00000167996	4105.76	1.72471	0.478301	3.60591	0.00031106	0.0315351	2495	FTH1	11	61959718	61967660	protein_coding
ENSG00000168010	551.859	2.74354	0.65261	4.20395	2.62294e-05	0.0103389	89849	ATG16L2	11	72814308	72843674	protein_coding
ENSG00000168310	112.287	1.97265	0.560413	3.51999	0.000431561	0.0381061	3660	IRF2	4	184387713	184474580	protein_coding
ENSG00000168394	236.713	1.85635	0.512917	3.61921	0.000295505	0.0311104	6890	TAP1	6	32845209	32853978	protein_coding
ENSG00000168734	50.0604	-1.88732	0.548628	-3.44006	0.000581576	0.044399	11142	PKIG	20	44531785	44624247	protein_coding
ENSG00000169180	267.74	2.79741	0.597651	4.68068	2.85926e-06	0.00521767	23214	XPO6	16	28097979	28211920	protein_coding
ENSG00000169403	402.372	1.86586	0.545466	3.42067	0.00062466	0.0448703	5724	PTAFR	1	28147166	28193936	protein_coding
ENSG00000170458	363.645	2.57784	0.686734	3.75377	0.000174194	0.0238406	929	CD14	5	140631728	140633701	protein_coding
ENSG00000170525	796.463	2.65212	0.654901	4.04965	5.12937e-05	0.012764	5209	PFKFB3	10	6144934	6254644	protein_coding
ENSG00000171236	857.281	2.39898	0.587834	4.08106	4.48316e-05	0.0122715	116844	LRG1	19	4536409	4540474	protein_coding
ENSG00000171310	78.1579	2.15685	0.646523	3.33608	0.000849694	0.0488924	50515	CHST11	12	104455295	104762014	protein_coding
ENSG00000171502	10.3146	6.60985	1.64972	4.00664	6.15889e-05	0.0136787	255631	COL24A1	1	85729233	86156943	protein_coding
ENSG00000171700	60.0006	3.07016	0.890188	3.44889	0.000562906	0.043711	10287	RGS19	20	64073181	64079988	protein_coding
ENSG00000172007	16.4983	4.1389	1.17538	3.52134	0.000429367	0.0381061	83452	RAB33B	4	139453232	139476609	protein_coding
ENSG00000172216	1329.57	2.35137	0.58914	3.99119	6.57415e-05	0.0141138	1051	CEBPB	20	50190734	50192689	protein_coding
ENSG00000172243	421.121	2.2494	0.589278	3.81722	0.000134963	0.021731	64581	CLEC7A	12	10116777	10130258	protein_coding
ENSG00000173110	46.6239	3.48396	0.847477	4.11098	3.9398e-05	0.0121327	3310	HSPA6	1	161524540	161526910	protein_coding
ENSG00000173193	355.416	1.90643	0.455663	4.18386	2.86598e-05	0.0103389	54625	PARP14	3	122680618	122730840	protein_coding
ENSG00000173334	491.937	2.1805	0.584992	3.7274	0.000193464	0.0241323	10221	TRIB1	8	125430321	125438405	protein_coding
ENSG00000173868	33.2715	5.20214	1.1553	4.50285	6.70484e-06	0.00815681	162466	PHOSPHO1	17	49223362	49230766	protein_coding
ENSG00000175463	50.1829	3.07113	0.905336	3.39225	0.000693216	0.0454492	374403	TBC1D10C	11	67403915	67410089	protein_coding
ENSG00000175471	61.2301	3.05279	0.858177	3.55729	0.000374699	0.0359875	79772	MCTP1	5	94703741	95284575	protein_coding
ENSG00000175984	97.2371	-1.52606	0.406223	-3.75671	0.000172165	0.0238406	163259	DENND2C	1	114582848	114670422	protein_coding
ENSG00000177663	323.077	1.73785	0.523089	3.32228	0.000892847	0.049861	23765	IL17RA	22	17084954	17115694	protein_coding
ENSG00000178467	20.9507	-2.66726	0.792687	-3.36483	0.00076591	0.0460767	54681	P4HTM	3	48989886	49007154	protein_coding
ENSG00000181634	15.5357	5.0958	1.36735	3.72676	0.000193956	0.0241323	9966	TNFSF15	9	114784635	114806126	protein_coding
ENSG00000182253	12.6761	-2.99231	0.886965	-3.37365	0.000741781	0.0460525	23336	SYNM	15	99098217	99135593	protein_coding
ENSG00000182541	582.287	2.07472	0.51078	4.06187	4.86809e-05	0.012764	3985	LIMK2	22	31212239	31280080	protein_coding
ENSG00000182782	137.925	2.79573	0.716941	3.89952	9.6383e-05	0.0191872	338442	HCAR2	12	122701293	122703343	protein_coding
ENSG00000184208	27.4402	3.68779	0.954013	3.86556	0.000110836	0.0204971	79640	C22orf46	22	41688939	41698136	protein_coding
ENSG00000184445	9.98602	3.84957	1.14234	3.36989	0.000751985	0.0460525	9735	KNTC1	12	122527246	122626396	protein_coding
ENSG00000184557	385.46	3.78451	1.01627	3.72391	0.000196162	0.0241323	9021	SOCS3	17	78356778	78360077	protein_coding
ENSG00000185379	14.663	-3.40381	0.847956	-4.01414	5.96639e-05	0.0136096	5892	RAD51D	17	35092208	35121522	protein_coding
ENSG00000185650	2825.92	1.86171	0.480116	3.87762	0.000105483	0.0202619	677	ZFP36L1	14	68787660	68796253	protein_coding
ENSG00000187116	268.425	3.51576	0.995534	3.53154	0.000413152	0.037911	353514	LILRA5	19	54307070	54313139	protein_coding
ENSG00000187608	213.832	3.01447	0.703621	4.28422	1.83378e-05	0.0091983	9636	ISG15	1	1001138	1014540	protein_coding
ENSG00000188186	116.035	1.76103	0.409522	4.30022	1.7063e-05	0.0091983	389541	LAMTOR4	7	100148907	100155944	protein_coding
ENSG00000188404	367.945	2.58825	0.737243	3.51071	0.000446909	0.0382281	6402	SELL	1	169690667	169711698	protein_coding
ENSG00000188536	198.644	4.69189	1.26864	3.69836	0.000216994	0.0248917	3040	HBA2	16	172876	173710	protein_coding
ENSG00000197580	16.5632	-3.18486	0.949098	-3.35568	0.000791711	0.0466045	83875	BCO2	11	112175467	112224699	protein_coding
ENSG00000198258	163.304	1.21425	0.334292	3.63231	0.000280895	0.0298594	59286	UBL5	19	9827892	9830115	protein_coding
ENSG00000198626	10.6378	6.53748	1.58393	4.12738	3.66916e-05	0.0118158	6262	RYR2	1	237042205	237833988	protein_coding
ENSG00000198814	240.554	2.09257	0.553238	3.7824	0.000155324	0.0231955	2710	GK	X	30653359	30731456	protein_coding
ENSG00000199883	10.5453	4.43083	1.25192	3.53922	0.000401307	0.0378786	NA	RN7SKP90	11	16842253	16842587	misc_RNA
ENSG00000202198	33.0405	2.7924	0.81287	3.43523	0.000592041	0.044399	NA		6	52995620	52995950	misc_RNA
ENSG00000203710	23.432	3.83848	1.12255	3.41944	0.000627491	0.0448703	1378	CR1	1	207496147	207641765	protein_coding
ENSG00000204160	304.611	2.07432	0.607465	3.41472	0.000638468	0.0448703	84243	ZDHHC18	1	26826710	26857602	protein_coding
ENSG00000204642	228.192	1.45202	0.411457	3.52898	0.00041717	0.037911	3134	HLA-F	6	29722775	29738528	protein_coding
ENSG00000205002	17.1743	6.46731	1.5121	4.27703	1.89404e-05	0.0091983	441376	AARD	8	116938199	116944487	protein_coding
ENSG00000205269	13.3989	4.24237	1.13686	3.73167	0.000190212	0.0241323	100113407	TMEM170B	6	11538278	11583524	protein_coding
ENSG00000207175	12.6876	6.12107	1.41409	4.32862	1.50047e-05	0.0091983	NA	RNU1-67P	X	119423742	119423905	snRNA
ENSG00000210144	232.995	2.05993	0.577253	3.56849	0.000359039	0.0350993	NA	MT-TY	MT	5826	5891	Mt_tRNA
ENSG00000210176	116.971	3.7254	1.11868	3.33017	0.000867937	0.0492386	NA	MT-TH	MT	12138	12206	Mt_tRNA
ENSG00000213654	140.573	2.60334	0.740851	3.51399	0.000441435	0.0382281	63940	GPSM3	6	32190766	32195523	protein_coding
ENSG00000217555	265.107	2.26441	0.627071	3.61108	0.000304924	0.0314964	51192	CKLF	16	66552563	66566251	protein_coding
ENSG00000218336	19.173	5.88777	1.375	4.28203	1.85199e-05	0.0091983	55714	TENM3	4	182143987	182803024	protein_coding
ENSG00000222009	35.829	3.20897	0.953407	3.36579	0.000763259	0.0460767	149478	BTBD19	1	44808482	44815585	protein_coding
ENSG00000224397	60.3772	2.99603	0.864092	3.46726	0.000525799	0.0426443	100506115	SMIM25	20	50267486	50279795	lincRNA
ENSG00000225611	10.2188	6.9669	1.6671	4.17905	2.92725e-05	0.0103389	729083	LINC02158	3	42770612	42773635	antisense
ENSG00000226321	19.3351	-2.89466	0.832596	-3.47667	0.000507677	0.0414817	728763	CROCC2	2	240906330	240993311	protein_coding
ENSG00000228695	12.4742	5.22385	1.55351	3.36261	0.000772086	0.0461944	51716	CES1P1	16	55760566	55793960	transcribed_unprocessed_pseudogene
ENSG00000228695	12.4742	5.22385	1.55351	3.36261	0.000772086	0.0461944	107987423	CES1P1	16	55760566	55793960	transcribed_unprocessed_pseudogene
ENSG00000230092	17.6931	4.03041	1.18049	3.41418	0.000639736	0.0448703	NA		1	800879	817712	transcribed_unprocessed_pseudogene
ENSG00000230438	11.9848	6.45052	1.59526	4.04354	5.265e-05	0.0128103	221756	SERPINB9P1	6	2854657	2881407	lincRNA
ENSG00000230454	16.8424	7.61853	2.11425	3.60343	0.000314046	0.0315458	NA		3	50260303	50263358	lincRNA
ENSG00000231767	25.6988	6.16201	1.1636	5.29562	1.18614e-07	0.0012987	NA		1	192716132	192716653	protein_coding
ENSG00000234745	10253.9	1.72109	0.455706	3.77675	0.000158888	0.0231955	3106	HLA-B	6	31269491	31357188	protein_coding
ENSG00000240634	12.3847	5.38319	1.5656	3.43842	0.000585125	0.044399	NA		16	28813980	28814673	processed_pseudogene
ENSG00000241061	10.2675	5.53192	1.63929	3.37459	0.000739271	0.0460525	NA	RPL5P1	15	24908932	24909825	processed_pseudogene
ENSG00000241157	21.9489	6.73067	1.83042	3.67713	0.000235873	0.0258258	NA		17	60245288	60245647	processed_pseudogene
ENSG00000243806	18.3112	4.27583	1.2781	3.34546	0.000821455	0.047841	NA	RPL7P18	5	94825961	94826694	processed_pseudogene
ENSG00000244482	15.8236	5.75573	1.49981	3.83764	0.000124223	0.0205524	79168	LILRA6	19	54236592	54242791	protein_coding
ENSG00000250442	12.0918	6.95532	1.61413	4.30901	1.63986e-05	0.0091983	NA	EIF3KP3	4	116043407	116044045	processed_pseudogene
ENSG00000251230	77.3995	4.20118	1.13618	3.69763	0.000217622	0.0248917	NA	MIR3945HG	4	184844585	184855751	lincRNA
ENSG00000253276	90.9573	2.91185	0.735539	3.9588	7.5327e-05	0.0155614	168455	CCDC71L	7	106656765	106660996	protein_coding
ENSG00000256612	262.163	-2.05219	0.581649	-3.52823	0.000418347	0.037911	1556	CYP2B7P	19	40924219	40950660	transcribed_unprocessed_pseudogene
ENSG00000266094	668.348	1.73386	0.519894	3.33503	0.000852905	0.0488924	83593	RASSF5	1	206507530	206589448	protein_coding
ENSG00000267385	33.3205	4.20904	1.09706	3.83665	0.000124725	0.0205524	NA		19	4528427	4540067	protein_coding
ENSG00000275302	153.687	3.96778	1.05977	3.74399	0.00018112	0.0241323	6351	CCL4	17	36103590	36105621	protein_coding
ENSG00000277001	14.2293	5.2441	1.5791	3.32095	0.000897125	0.049861	NA		5	91314716	91314997	misc_RNA
ENSG00000277443	835.062	1.8632	0.551513	3.37835	0.000729234	0.0460525	4082	MARCKS	6	113857362	113863471	protein_coding
ENSG00000277632	91.5578	3.18206	0.861959	3.69166	0.000222796	0.0248917	6348	CCL3	17	36088256	36090169	protein_coding
ENSG00000279159	20.1131	5.65048	1.34739	4.19365	2.74497e-05	0.0103389	NA		22	29978950	30028236	antisense
ENSG00000279948	14.7996	-3.24541	0.854578	-3.79768	0.000146058	0.022211	NA		19	46946535	46949156	TEC
