# Supplementary material for: Inflammatory pathways are upregulated in the nasal epithelium in patients with idiopathic pulmonary fibrosis
Source: Respir Res. 2018 Nov 26;19:233. doi: 10.1186/s12931-018-0932-7 (PMC6257973; doi:10.1186/s12931-018-0932-7)
Supplement: Supplementary file 9 — Table S11. Simplified gene signature. (XLS 59 kb) [file 12931_2018_932_MOESM9_ESM.xls]

## Sheet: AdditionalTableS11
Additional Table S11. Simplified gene signature
ensembl_gene_id	logFC1	FDR1	logFC2	FDR2	logFC3	FDR3	logFC4	FDR4	symbol
ENSG00000103257	3.33514	7.11854e-05	3.27216	0.000105426	3.27283	0.000503239	3.48246	9.46406e-05	SLC7A5
ENSG00000074660	3.28292	0.00272735	3.97909	0.000264108	3.94567	0.000883574	4.23632	9.46406e-05	SCARF1
ENSG00000277632	3.63386	9.75132e-05	3.85194	0.000105426	3.85496	0.000503239	4.01706	0.000107463	CCL3
ENSG00000102524	3.02702	0.000115636	3.01142	0.000202741	3.01016	0.000503239	3.08721	0.000565645	TNFSF13B
ENSG00000205002	5.07646	0.00143138	5.29141	0.000264108	5.37208	0.000536891	6.06532	0.000687554	AARD
ENSG00000186188	5.94526	4.88437e-05	5.2966	0.000514356	5.27883	0.000631629	5.85035	0.000817476	FFAR4
ENSG00000275302	3.806	0.00029292	3.88574	0.000404126	3.90401	0.00107524	4.05905	0.000866523	CCL4
ENSG00000244482	5.4707	0.000201319	6.49197	2.59001e-05	6.36144	0.000101071	5.91401	0.000927926	LILRA6
ENSG00000183019	3.80468	0.000279209	3.8049	0.000399565	3.80651	0.00104702	3.9526	0.00107783	MCEMP1
ENSG00000230438	6.50689	9.5104e-06	6.46302	2.13518e-05	6.43982	9.16854e-05	6.54305	0.00217105	SERPINB9P1
ENSG00000198216	6.72724	4.13615e-05	5.26146	0.00105001	5.19432	0.000740809	6.65288	0.00488342	CACNA1E
